# Supplementary material for: Accounting for sex differences variability in the design of sex-adapted cancer treatments
Source: medRxiv preprint, doi:10.1101/2023.04.22.23288966, version 1 (2023-04-25)
Supplement: Pole-defining genes for each cancer [file 288966_file02.xlsx]

## Sheet: ACC
gene	stat	p	fdr	direction
XIST	-7.83625	2.10106e-11	3.20023e-08	Female
ATXN10	-7.6508	4.77072e-11	6.29767e-08	Female
TSIX	-7.62837	5.26741e-11	6.51875e-08	Female
SLC25A20	-7.36862	1.65458e-10	1.82013e-07	Female
KLF11	-7.33753	1.89684e-10	1.97681e-07	Female
SMAD2	-7.31817	2.06522e-10	2.04467e-07	Female
RALBP1	-7.28159	2.425e-10	2.28654e-07	Female
PDE2A	-7.25837	2.68514e-10	2.41675e-07	Female
PPARA	-7.15188	4.28151e-10	3.53242e-07	Female
SYTL2	-7.1538	4.24584e-10	3.53242e-07	Female
CTNNB1	-7.06549	6.24646e-10	4.94745e-07	Female
IDH1	-6.67457	3.41217e-09	2.41302e-06	Female
FAM168B	-6.48033	7.86977e-09	5.19431e-06	Female
CD97	-6.39138	1.15152e-08	7.35526e-06	Female
SEMA4G	-6.23962	2.1973e-08	1.20858e-05	Female
CAT	-6.18444	2.77627e-08	1.39889e-05	Female
SLC30A1	-6.11058	3.7931e-08	1.83188e-05	Female
LDOC1L	-6.07285	4.44661e-08	2.09637e-05	Female
RBP3	-6.03197	5.28079e-08	2.42787e-05	Female
MTMR3	-6.01019	5.78633e-08	2.54611e-05	Female
C22orf29	-5.96872	6.88494e-08	2.78222e-05	Female
RASL10B	-5.91305	8.68931e-08	3.30879e-05	Female
GFRA2	-5.90216	9.09338e-08	3.39732e-05	Female
KIAA0100	-5.87754	1.00764e-07	3.69486e-05	Female
DPYSL2	-5.85308	1.11566e-07	3.87566e-05	Female
DCAF6	-5.81483	1.30784e-07	4.31608e-05	Female
CIDEA	-5.79213	1.43703e-07	4.66469e-05	Female
RAB30	-5.7742	1.54786e-07	4.94341e-05	Female
CDK6	-5.75641	1.66611e-07	5.23661e-05	Female
GALNT12	-5.73381	1.82932e-07	5.46225e-05	Female
SMCR7L	-5.72773	1.87583e-07	5.46225e-05	Female
PSD3	-5.72333	1.9102e-07	5.48171e-05	Female
HPD	-5.68785	2.21115e-07	6.23419e-05	Female
TTLL12	-5.68521	2.23538e-07	6.23419e-05	Female
PCK2	-5.67956	2.28797e-07	6.29224e-05	Female
LPA	-5.66989	2.38087e-07	6.45803e-05	Female
PBX1	-5.65895	2.49045e-07	6.55928e-05	Female
CEBPZ	-5.6349	2.74923e-07	7.06979e-05	Female
CASZ1	-5.61161	3.02489e-07	7.41405e-05	Female
FAM36A	-5.60989	3.04628e-07	7.41405e-05	Female
TEF	-5.61399	2.99541e-07	7.41405e-05	Female
FBXO9	-5.58698	3.34589e-07	7.83866e-05	Female
GRID2IP	-5.5856	3.36491e-07	7.83866e-05	Female
DAAM2	-5.56786	3.61807e-07	8.14108e-05	Female
TBXA2R	-5.56827	3.61205e-07	8.14108e-05	Female
ICK	-5.54295	4.00564e-07	8.71375e-05	Female
PLCL2	-5.54033	4.04861e-07	8.71375e-05	Female
LPHN3	-5.53011	4.22109e-07	8.79808e-05	Female
PDLIM2	-5.53151	4.19704e-07	8.79808e-05	Female
RARS2	-5.53042	4.21564e-07	8.79808e-05	Female
B3GALNT2	-5.52628	4.28747e-07	8.84336e-05	Female
RANGAP1	-5.52069	4.38625e-07	8.95383e-05	Female
PDIA6	-5.47541	5.27342e-07	0.000104672	Female
GAS2L1	-5.43154	6.30058e-07	0.000121922	Female
TMCO3	-5.42991	6.3421e-07	0.000121922	Female
ELOVL3	-5.39232	7.38317e-07	0.000139065	Female
UBR4	-5.38768	7.52307e-07	0.000139219	Female
PARVB	-5.37609	7.88324e-07	0.000144014	Female
SHROOM3	-5.37398	7.95032e-07	0.000144014	Female
ASB13	-5.36354	8.29209e-07	0.00014792	Female
AFG3L2	-5.3485	8.80979e-07	0.00015302	Female
NAGS	-5.34958	8.77174e-07	0.00015302	Female
SH3BP5L	-5.34224	9.03466e-07	0.000155561	Female
BIRC2	-5.33949	9.13512e-07	0.000155935	Female
CBS	-5.32532	9.67058e-07	0.000161625	Female
ALS2	-5.31252	1.01809e-06	0.000167994	Female
SNURF	-5.30015	1.06987e-06	0.000175079	Female
LOC389333	-5.28304	1.14583e-06	0.000182972	Female
FAM45B	-5.25621	1.27567e-06	0.000198894	Female
FECH	-5.24793	1.31858e-06	0.000199307	Female
SPTBN1	-5.25124	1.30125e-06	0.000199307	Female
TIMM17A	-5.23778	1.37313e-06	0.000204431	Female
CCL22	-5.23045	1.41386e-06	0.000205449	Female
GLT25D2	-5.2247	1.44668e-06	0.000205449	Female
LAMC3	-5.23163	1.4072e-06	0.000205449	Female
NRXN2	-5.22556	1.44172e-06	0.000205449	Female
RAB4A	-5.21959	1.47642e-06	0.000207337	Female
SEMA6B	-5.21473	1.50527e-06	0.000208432	Female
SREBF2	-5.21518	1.50261e-06	0.000208432	Female
CMTM4	-5.20609	1.558e-06	0.000211301	Female
DSTYK	-5.19737	1.613e-06	0.000217272	Female
GRIK5	-5.19505	1.62795e-06	0.000217805	Female
SAP130	-5.19116	1.65335e-06	0.000219718	Female
MOBKL3	-5.1868	1.6822e-06	0.000222061	Female
CHRNB4	-5.16321	1.84742e-06	0.000237908	Female
RETSAT	-5.15749	1.88984e-06	0.000241424	Female
DISP1	-5.15072	1.94121e-06	0.000243334	Female
N4BP3	-5.14924	1.95265e-06	0.000243334	Female
PGM5P2	-5.14907	1.95395e-06	0.000243334	Female
RELN	-5.15295	1.92418e-06	0.000243334	Female
NBPF1	-5.14308	2.00088e-06	0.000246084	Female
CCNY	-5.13518	2.06442e-06	0.000250783	Female
MAPK8IP2	-5.1319	2.09145e-06	0.000252517	Female
RND2	-5.1258	2.14247e-06	0.00025403	Female
IMMT	-5.10455	2.3302e-06	0.000271413	Female
HYAL1	-5.09799	2.39128e-06	0.000276899	Female
C1orf69	-5.07118	2.6578e-06	0.000294702	Female
RPS6KC1	-5.0731	2.6378e-06	0.000294702	Female
CLNK	-5.0571	2.80914e-06	0.000298642	Female
POLDIP3	-5.05667	2.81395e-06	0.000298642	Female
SEPT4	-5.05763	2.80334e-06	0.000298642	Female
SNX6	-5.06216	2.75377e-06	0.000298642	Female
UGGT1	-5.05819	2.79717e-06	0.000298642	Female
CIDEB	-5.04946	2.89484e-06	0.000303285	Female
ASB4	-5.04059	2.9974e-06	0.000312376	Female
GSTT2	-5.03734	3.03589e-06	0.000313092	Female
GCK	-5.01498	3.31407e-06	0.000333355	Female
MFHAS1	-5.01607	3.29999e-06	0.000333355	Female
TMX2	-5.01479	3.31655e-06	0.000333355	Female
GYLTL1B	-5.00974	3.3829e-06	0.000334544	Female
ITIH3	-5.00938	3.38756e-06	0.000334544	Female
SLC22A11	-5.00911	3.39119e-06	0.000334544	Female
TRIM16	-4.98862	3.67419e-06	0.000355369	Female
EFNA4	-4.96926	3.96268e-06	0.000377236	Female
APOBEC2	-4.93106	4.59838e-06	0.000427476	Female
IL17RA	-4.91702	4.85629e-06	0.000447253	Female
PIAS2	-4.90766	5.03591e-06	0.000455514	Female
WDSUB1	-4.89736	5.24102e-06	0.000469581	Female
SCAP	-4.89542	5.28068e-06	0.000471003	Female
HS6ST1	-4.87818	5.64528e-06	0.00049681	Female
PNMAL2	-4.86961	5.83545e-06	0.000511273	Female
MAPK1	-4.86582	5.92152e-06	0.000515492	Female
SS18	-4.8652	5.93567e-06	0.000515492	Female
CERK	-4.84611	6.38971e-06	0.000546594	Female
CPN2	-4.8453	6.40977e-06	0.000546594	Female
FZD7	-4.84402	6.44153e-06	0.000546594	Female
SUPT6H	-4.8433	6.45942e-06	0.000546594	Female
CLTCL1	-4.82879	6.8308e-06	0.00056357	Female
KIAA1644	-4.82948	6.81265e-06	0.00056357	Female
TSG101	-4.81356	7.24326e-06	0.000590221	Female
LMX1B	-4.79889	7.66303e-06	0.000611115	Female
C9orf84	-4.78997	7.92997e-06	0.000628085	Female
ZC3H10	-4.78581	8.05754e-06	0.000633124	Female
STAB2	-4.77835	8.29143e-06	0.000648927	Female
NKPD1	-4.76766	8.63782e-06	0.000668599	Female
ABCB4	-4.76322	8.78577e-06	0.000674291	Female
ANKS6	-4.75941	8.91492e-06	0.000680555	Female
HSPD1	-4.75778	8.9705e-06	0.000680555	Female
MOAP1	-4.75808	8.96041e-06	0.000680555	Female
ACLY	-4.73138	9.92223e-06	0.000738728	Female
KLHDC2	-4.73134	9.92383e-06	0.000738728	Female
SLC44A4	-4.71718	1.04738e-05	0.000770976	Female
PNLIPRP2	-4.71538	1.05461e-05	0.000773423	Female
VPS4B	-4.7135	1.06218e-05	0.000776097	Female
PROX1	-4.70408	1.10094e-05	0.000792717	Female
PTX4	-4.70089	1.1144e-05	0.000799499	Female
TNFSF4	-4.69586	1.1359e-05	0.000811981	Female
DLC1	-4.69426	1.1428e-05	0.000813978	Female
HSDL1	-4.69005	1.16125e-05	0.000819208	Female
WNT3	-4.68975	1.16255e-05	0.000819208	Female
UBE4B	-4.68442	1.18633e-05	0.000832998	Female
PSMD2	-4.66706	1.26705e-05	0.000868128	Female
MYOM1	-4.65827	1.30997e-05	0.00088831	Female
ADM2	-4.65553	1.32363e-05	0.000894513	Female
MOCOS	-4.64135	1.39651e-05	0.000931053	Female
TMEM17	-4.63463	1.43246e-05	0.000951815	Female
C10orf72	-4.63022	1.45649e-05	0.000953529	Female
LRRC8D	-4.6293	1.46155e-05	0.000953529	Female
RHBDD3	-4.61904	1.51922e-05	0.000973533	Female
DDTL	-4.61242	1.55761e-05	0.000988533	Female
CDH2	-4.60806	1.5834e-05	0.00100169	Female
TBC1D10A	-4.60676	1.59117e-05	0.0010034	Female
RHBG	-4.60588	1.59643e-05	0.00100352	Female
FGFRL1	-4.5956	1.6594e-05	0.00102361	Female
LGR5	-4.59303	1.67553e-05	0.00102716	Female
PAPSS2	-4.59203	1.68183e-05	0.00102783	Female
USP19	-4.59038	1.6923e-05	0.00103105	Female
FLJ36031	-4.57883	1.76732e-05	0.00106212	Female
MAFG	-4.57802	1.77268e-05	0.00106212	Female
PCP4	-4.57436	1.79721e-05	0.00107188	Female
USP34	-4.5713	1.81796e-05	0.001081	Female
C3orf59	-4.56967	1.82914e-05	0.00108439	Female
SLC26A6	-4.56469	1.86359e-05	0.00110152	Female
SLC12A2	-4.55898	1.9039e-05	0.00111536	Female
MOSC1	-4.54902	1.97625e-05	0.00115093	Female
FAM166B	-4.54086	2.03745e-05	0.00117963	Female
FGFR3	-4.53706	2.06661e-05	0.00118956	Female
MAML3	-4.5358	2.07636e-05	0.00119171	Female
METTL13	-4.527	2.14568e-05	0.00120701	Female
EPRS	-4.52588	2.15473e-05	0.00120867	Female
DUSP12	-4.52312	2.17702e-05	0.00121772	Female
EIF4ENIF1	-4.51989	2.20344e-05	0.001219	Female
PITX1	-4.51982	2.20394e-05	0.001219	Female
TYRO3	-4.52076	2.19625e-05	0.001219	Female
FBXO7	-4.51786	2.22012e-05	0.00122219	Female
ATP9B	-4.51317	2.25927e-05	0.00122722	Female
CA4	-4.51209	2.26839e-05	0.00122722	Female
EDNRB	-4.51315	2.25951e-05	0.00122722	Female
GSTA4	-4.51475	2.24602e-05	0.00122722	Female
VPREB3	-4.51225	2.26707e-05	0.00122722	Female
SLC31A1	-4.50994	2.28664e-05	0.00123373	Female
FASN	-4.50511	2.32817e-05	0.00124933	Female
KLHL14	-4.50332	2.34371e-05	0.0012519	Female
GAL3ST2	-4.49739	2.39605e-05	0.00126856	Female
AOC3	-4.48756	2.48526e-05	0.00130532	Female
VSNL1	-4.4879	2.48204e-05	0.00130532	Female
KAZ	-4.48338	2.52415e-05	0.00130864	Female
NDEL1	-4.48309	2.5268e-05	0.00130864	Female
PCNXL3	-4.48422	2.51626e-05	0.00130864	Female
SLC38A8	-4.47037	2.64898e-05	0.00135365	Female
WDR3	-4.46908	2.66173e-05	0.00135365	Female
ZFYVE20	-4.45438	2.81074e-05	0.00141617	Female
SLC29A4	-4.44905	2.86669e-05	0.00144069	Female
SLC25A44	-4.44147	2.94817e-05	0.00147416	Female
NIPSNAP1	-4.43957	2.96898e-05	0.00147977	Female
PDK4	-4.439	2.97518e-05	0.00147977	Female
PSMD1	-4.42519	3.13094e-05	0.00154603	Female
LGI3	-4.42244	3.16283e-05	0.00155403	Female
PEX11A	-4.42174	3.17097e-05	0.00155417	Female
GAL3ST1	-4.4187	3.20679e-05	0.00156784	Female
AKIRIN2	-4.41508	3.24977e-05	0.00158105	Female
RPTOR	-4.41181	3.28924e-05	0.00158854	Female
PTPN4	-4.40155	3.41581e-05	0.00162015	Female
TMEM64	-4.40326	3.39441e-05	0.00162015	Female
LRRC16B	-4.39535	3.49469e-05	0.00164736	Female
PIGS	-4.39474	3.50254e-05	0.00164736	Female
TNS1	-4.39116	3.54892e-05	0.00166522	Female
YLPM1	-4.38157	3.67618e-05	0.00171679	Female
FAM45A	-4.37751	3.73129e-05	0.00173544	Female
LRP8	-4.37734	3.73364e-05	0.00173544	Female
SLC25A15	-4.3717	3.81166e-05	0.00175523	Female
PARG	-4.3705	3.82849e-05	0.00175594	Female
ZIC2	-4.36718	3.87539e-05	0.00176001	Female
AMDHD1	-4.36145	3.95755e-05	0.00178504	Female
PSME4	-4.36264	3.94033e-05	0.00178504	Female
AMBRA1	-4.35931	3.98875e-05	0.00178691	Female
MRPL49	-4.36003	3.97825e-05	0.00178691	Female
UGCG	-4.35715	4.02028e-05	0.00179697	Female
CYFIP2	-4.35359	4.07314e-05	0.00181241	Female
HIC2	-4.35117	4.10933e-05	0.00182366	Female
NBEAL1	-4.35006	4.12606e-05	0.00182366	Female
CYTSA	-4.34505	4.20224e-05	0.00184498	Female
PI4KB	-4.33516	4.35686e-05	0.00189554	Female
JOSD1	-4.33303	4.39086e-05	0.00189833	Female
SAMM50	-4.33348	4.38368e-05	0.00189833	Female
SMS	-4.32988	4.44156e-05	0.00191606	Female
ZNF687	-4.32331	4.54932e-05	0.00194559	Female
FAM82A1	-4.32261	4.56099e-05	0.00194638	Female
DEPDC5	-4.31868	4.6267e-05	0.00196174	Female
C17orf103	-4.31719	4.65199e-05	0.00196825	Female
EPS8L2	-4.31515	4.6866e-05	0.00197866	Female
LGALS8	-4.31184	4.74346e-05	0.00198945	Female
LOC284100	-4.31149	4.74946e-05	0.00198945	Female
FDPS	-4.30935	4.78668e-05	0.00199249	Female
RAET1E	-4.30674	4.83238e-05	0.00199737	Female
TXNDC9	-4.3062	4.84186e-05	0.00199737	Female
HIRA	-4.30558	4.8528e-05	0.00199772	Female
ETV5	-4.30144	4.92628e-05	0.00201124	Female
FGF21	-4.29538	5.03598e-05	0.00203375	Female
CD83	-4.29206	5.09716e-05	0.0020514	Female
ACY1	-4.29008	5.13392e-05	0.0020559	Female
ITGA7	-4.29061	5.12415e-05	0.0020559	Female
NMT2	-4.28622	5.20639e-05	0.00207846	Female
MUCL1	-4.28464	5.23632e-05	0.00208202	Female
NEK8	-4.28498	5.22983e-05	0.00208202	Female
C2orf60	-4.28015	5.32239e-05	0.0020952	Female
PES1	-4.28079	5.3099e-05	0.0020952	Female
TRAK2	-4.27479	5.42671e-05	0.0021236	Female
DDX50	-4.26912	5.53925e-05	0.00213249	Female
DNM1	-4.27075	5.50668e-05	0.00213249	Female
METTL2A	-4.27089	5.50398e-05	0.00213249	Female
RHOF	-4.26823	5.55711e-05	0.00213249	Female
UBE2Q2	-4.26927	5.53639e-05	0.00213249	Female
XRCC6	-4.26842	5.55337e-05	0.00213249	Female
GDPD5	-4.26526	5.61735e-05	0.00214314	Female
EIF4A3	-4.26324	5.65848e-05	0.00215055	Female
ERN1	-4.26183	5.68735e-05	0.00215325	Female
DHX32	-4.2541	5.84861e-05	0.00219334	Female
KDM5B	-4.25208	5.8916e-05	0.00220528	Female
PTPRF	-4.24914	5.95438e-05	0.00222039	Female
PDZD8	-4.24849	5.96839e-05	0.00222143	Female
FOXN3	-4.24549	6.03348e-05	0.00223057	Female
DNAJC16	-4.24153	6.12027e-05	0.00225675	Female
C14orf21	-4.23867	6.18386e-05	0.00227596	Female
LIFR	-4.23678	6.22613e-05	0.00227881	Female
PRKD3	-4.22855	6.41357e-05	0.00233018	Female
DCAF11	-4.22657	6.45954e-05	0.00233831	Female
KDM6A	-4.2247	6.50311e-05	0.00234589	Female
RNF121	-4.22415	6.51604e-05	0.00234589	Female
LMAN1L	-4.22153	6.57765e-05	0.00235949	Female
GPR125	-4.21669	6.69327e-05	0.00238426	Female
KCTD20	-4.21663	6.69485e-05	0.00238426	Female
CD46	-4.21304	6.78183e-05	0.00239371	Female
PRMT5	-4.21392	6.7603e-05	0.00239371	Female
PNPLA3	-4.19238	7.304e-05	0.00254624	Female
PRKAR2A	-4.19047	7.35417e-05	0.00255434	Female
RQCD1	-4.18783	7.42427e-05	0.00256558	Female
LEFTY2	-4.18444	7.51488e-05	0.00259237	Female
C6orf122	-4.18098	7.60858e-05	0.00260876	Female
CHIC2	-4.18176	7.58734e-05	0.00260876	Female
CST5	-4.18095	7.60953e-05	0.00260876	Female
SBF1	-4.18015	7.63124e-05	0.00260978	Female
AMOTL2	-4.17735	7.70803e-05	0.00261428	Female
C22orf26	-4.17679	7.72362e-05	0.00261428	Female
HSD17B11	-4.17784	7.69464e-05	0.00261428	Female
SLC30A10	-4.17849	7.67683e-05	0.00261428	Female
THOC5	-4.17686	7.72155e-05	0.00261428	Female
LOC100130238	-4.1718	7.86272e-05	0.00265682	Female
COL11A1	-4.16585	8.0317e-05	0.00267859	Female
TAC4	-4.16473	8.06392e-05	0.00268359	Female
C9orf172	-4.16314	8.10995e-05	0.00268987	Female
FAM114A1	-4.16138	8.16098e-05	0.00269326	Female
ELAC1	-4.1595	8.21619e-05	0.00270247	Female
IRAK1	-4.15717	8.28486e-05	0.00271155	Female
SGCE	-4.15344	8.39589e-05	0.00274335	Female
CACNB1	-4.15274	8.41662e-05	0.00274559	Female
FAM83G	-4.15225	8.43148e-05	0.00274592	Female
FLJ22536	-4.1506	8.48133e-05	0.00275289	Female
FRMPD1	-4.15045	8.48568e-05	0.00275289	Female
YWHAQ	-4.14888	8.53345e-05	0.00275289	Female
CST2	-4.14581	8.62731e-05	0.00277771	Female
ORC2L	-4.14412	8.67955e-05	0.00279	Female
ETV4	-4.14212	8.74155e-05	0.00280537	Female
POLG	-4.13991	8.81077e-05	0.00281391	Female
SIM2	-4.13991	8.81058e-05	0.00281391	Female
GPR75	-4.13632	8.92411e-05	0.00283638	Female
PTPLAD1	-4.13643	8.92059e-05	0.00283638	Female
CD300LG	-4.13284	9.03518e-05	0.00286249	Female
TMIE	-4.13167	9.07291e-05	0.00286938	Female
ANKRD28	-4.12477	9.29843e-05	0.0028904	Female
ATP8B3	-4.12816	9.18689e-05	0.0028904	Female
BACE1	-4.12857	9.17348e-05	0.0028904	Female
C10orf26	-4.12534	9.27939e-05	0.0028904	Female
DPYSL5	-4.1252	9.2841e-05	0.0028904	Female
C6orf223	-4.11818	9.51868e-05	0.00291892	Female
CCDC90B	-4.11909	9.48783e-05	0.00291892	Female
DHX9	-4.11832	9.51382e-05	0.00291892	Female
ITPR2	-4.11776	9.53292e-05	0.00291892	Female
TNFSF13B	-4.11239	9.71614e-05	0.00295352	Female
AP3M1	-4.11072	9.77387e-05	0.00295897	Female
C18orf45	-4.11066	9.7762e-05	0.00295897	Female
DAPL1	-4.11032	9.78802e-05	0.00295897	Female
SULT2B1	-4.10821	9.86149e-05	0.00297211	Female
ENTPD8	-4.10666	9.91578e-05	0.00298393	Female
ACAN	-4.1027	0.000100561	0.00301622	Female
FOXA3	-4.10031	0.000101416	0.00303344	Female
FAM83H	-4.09912	0.000101845	0.00304167	Female
SPRR2B	-4.09227	0.000104344	0.00309763	Female
ABR	-4.09048	0.000105009	0.00311269	Female
C1orf55	-4.08757	0.000106094	0.00312149	Female
HYAL3	-4.08777	0.000106018	0.00312149	Female
PARD3	-4.08858	0.000105715	0.00312149	Female
SPRR2D	-4.08804	0.000105917	0.00312149	Female
CCDC73	-4.08271	0.000107934	0.00316621	Female
MPP3	-4.07804	0.000109729	0.00320464	Female
CYTH1	-4.07598	0.000110529	0.00320815	Female
RIOK3	-4.07684	0.000110196	0.00320815	Female
LEFTY1	-4.07167	0.000112225	0.00324877	Female
CNTD2	-4.06892	0.000113319	0.00327568	Female
ARHGAP1	-4.06575	0.000114593	0.00329325	Female
IDI1	-4.06114	0.00011647	0.00332309	Female
UNC50	-4.06133	0.000116393	0.00332309	Female
LOC642852	-4.05981	0.000117017	0.00332903	Female
MYH2	-4.05941	0.000117183	0.00332903	Female
C12orf53	-4.05817	0.000117697	0.00333713	Female
EIF5	-4.05725	0.00011808	0.00333713	Female
ITGA9	-4.05746	0.000117992	0.00333713	Female
KILLIN	-4.0571	0.000118142	0.00333713	Female
ABLIM2	-4.0556	0.000118767	0.00334525	Female
C10orf28	-4.05326	0.000119749	0.00336811	Female
ZRANB1	-4.05256	0.000120044	0.00337161	Female
HAT1	-4.04867	0.000121701	0.0034133	Female
SLC12A1	-4.04683	0.00012249	0.0034306	Female
ELP2	-4.04376	0.000123821	0.00343387	Female
PAQR7	-4.04442	0.000123531	0.00343387	Female
SCAMP3	-4.04465	0.000123433	0.00343387	Female
UNC119B	-4.04473	0.000123399	0.00343387	Female
LPPR1	-4.03932	0.000125766	0.00348293	Female
TMEM14A	-4.03609	0.000127203	0.0035178	Female
DDT	-4.03339	0.000128413	0.00354632	Female
C18orf10	-4.03102	0.000129487	0.00355612	Female
HIGD1A	-4.02121	0.000134021	0.00366033	Female
API5	-4.01175	0.000138538	0.00375264	Female
USP22	-4.00963	0.00013957	0.00377544	Female
NGEF	-4.00863	0.000140057	0.00378345	Female
TM9SF2	-4.00741	0.000140657	0.00378672	Female
SRP9	-4.00333	0.000142676	0.00382808	Female
SPATA21	-4.0028	0.000142942	0.00383004	Female
ARHGEF16	-4.00027	0.000144211	0.0038536	Female
CECR5	-3.99726	0.000145735	0.00387342	Female
GDI2	-3.99524	0.000146766	0.00389559	Female
ZNF496	-3.99199	0.000148442	0.00393221	Female
RPRD1A	-3.98864	0.00015019	0.00397052	Female
AMOT	-3.98814	0.00015045	0.00397209	Female
ZNF775	-3.9847	0.000152266	0.0039987	Female
PCCA	-3.98036	0.000154591	0.00403833	Female
EGLN1	-3.97622	0.000156837	0.00407551	Female
SLC7A1	-3.97098	0.000159722	0.00413418	Female
SOCS7	-3.97019	0.000160164	0.0041366	Female
FAM119B	-3.96913	0.000160752	0.00414459	Female
PLEKHM3	-3.96571	0.000162678	0.00417253	Female
C15orf37	-3.96398	0.000163658	0.00419224	Female
BEST4	-3.95812	0.00016703	0.00425658	Female
NBPF3	-3.95836	0.000166889	0.00425658	Female
PVRL3	-3.95629	0.00016809	0.00426711	Female
ALLC	-3.95454	0.000169119	0.00428142	Female
ZBTB42	-3.95477	0.000168985	0.00428142	Female
EIF3L	-3.95201	0.000170609	0.00428485	Female
NIPA2	-3.95154	0.000170888	0.00428485	Female
MAPK14	-3.9469	0.000173659	0.00433207	Female
PON2	-3.94682	0.000173712	0.00433207	Female
IP6K1	-3.94273	0.000176192	0.00437738	Female
TRIB1	-3.93647	0.000180052	0.00444541	Female
ARPC2	-3.93462	0.000181213	0.00445738	Female
TRIM32	-3.9323	0.000182675	0.00448778	Female
CYP27B1	-3.93087	0.00018358	0.00449885	Female
HIST1H3E	-3.93	0.00018413	0.00450675	Female
FAM69B	-3.92308	0.000188589	0.0045823	Female
HPCAL1	-3.92306	0.000188605	0.0045823	Female
NR1D2	-3.91976	0.000190771	0.00461792	Female
OSBP	-3.9183	0.000191733	0.00462685	Female
RORA	-3.91681	0.000192721	0.00463114	Female
THPO	-3.91413	0.000194514	0.00466293	Female
CUL5	-3.91224	0.000195791	0.00468219	Female
CEP76	-3.90765	0.000198916	0.00475119	Female
CIB4	-3.90656	0.000199664	0.00476332	Female
MPL	-3.89784	0.00020575	0.00486834	Female
SNORD116-4	-3.89818	0.000205512	0.00486834	Female
EPT1	-3.89733	0.000206114	0.00487025	Female
AATK	-3.89553	0.000207396	0.0048947	Female
SLIT2	-3.89102	0.000210643	0.00494486	Female
IMPA2	-3.89008	0.000211326	0.00495204	Female
XYLT1	-3.88966	0.00021163	0.00495329	Female
C6orf211	-3.88905	0.00021207	0.00495773	Female
ME1	-3.88664	0.00021384	0.00498146	Female
TFIP11	-3.88436	0.000215519	0.00500291	Female
RRM1	-3.88299	0.000216536	0.00502065	Female
BCAN	-3.88203	0.000217257	0.00503146	Female
C22orf15	-3.8808	0.000218175	0.00504241	Female
TFB2M	-3.88071	0.000218239	0.00504241	Female
HIST1H3H	-3.87859	0.000219834	0.00507336	Female
LRPPRC	-3.87733	0.000220793	0.00508954	Female
MRAS	-3.87478	0.00022273	0.00512824	Female
PCID2	-3.87246	0.000224512	0.00516325	Female
PI4KA	-3.87173	0.000225075	0.00517019	Female
KCMF1	-3.86918	0.000227049	0.00519145	Female
LOC729375	-3.86782	0.000228116	0.00520279	Female
PPP4R1	-3.86687	0.000228859	0.00520279	Female
SLC41A1	-3.86691	0.000228822	0.00520279	Female
SRMS	-3.864	0.000231119	0.00523015	Female
SNAP29	-3.85977	0.000234494	0.00526441	Female
VAV2	-3.85753	0.000236295	0.00529224	Female
FXC1	-3.85668	0.000236989	0.00529642	Female
CHRNA7	-3.85463	0.000238655	0.00532163	Female
NUP133	-3.85376	0.000239369	0.00533156	Female
FREM2	-3.84831	0.00024387	0.00540687	Female
PURB	-3.84855	0.000243675	0.00540687	Female
CAMK1	-3.84733	0.000244687	0.00540743	Female
R3HDM1	-3.84764	0.000244429	0.00540743	Female
LOC219347	-3.84496	0.000246678	0.00542712	Female
ZC3H7B	-3.84464	0.000246953	0.00542712	Female
ORC4L	-3.84148	0.000249631	0.00546785	Female
ARHGEF6	-3.83655	0.000253867	0.00553614	Female
PXMP2	-3.83687	0.000253593	0.00553614	Female
SMO	-3.83621	0.000254166	0.00553657	Female
IMPDH1	-3.83453	0.000255624	0.0055561	Female
EFNA3	-3.83249	0.000257408	0.00558262	Female
C1orf43	-3.83183	0.000257992	0.00558917	Female
KLHL20	-3.82936	0.000260167	0.00561784	Female
AGMAT	-3.82685	0.00026241	0.00566011	Female
SLC45A1	-3.82593	0.000263228	0.00566682	Female
RALYL	-3.82422	0.000264768	0.00568003	Female
MSI2	-3.82022	0.000268398	0.00575167	Female
CTDSPL2	-3.80891	0.000278924	0.00591661	Female
FLVCR1	-3.80883	0.000279	0.00591661	Female
AIMP2	-3.80807	0.000279721	0.00591747	Female
MARCH7	-3.80831	0.000279497	0.00591747	Female
C10orf2	-3.80446	0.00028318	0.00595249	Female
KCNG3	-3.80487	0.000282778	0.00595249	Female
AFF3	-3.80005	0.000287444	0.00603572	Female
NAA35	-3.79897	0.000288505	0.00605158	Female
ADSL	-3.79318	0.000294226	0.00615258	Female
IL23R	-3.79315	0.000294253	0.00615258	Female
PPP2R5C	-3.7928	0.00029461	0.00615355	Female
LOC572558	-3.7922	0.000295207	0.00615954	Female
LSS	-3.79161	0.000295792	0.00616524	Female
LOC284749	-3.79045	0.000296962	0.00617663	Female
FBXW10	-3.78998	0.000297439	0.00618005	Female
BAP1	-3.78837	0.000299064	0.0062073	Female
COG2	-3.78564	0.000301837	0.00625175	Female
CCNDBP1	-3.78444	0.000303072	0.00627077	Female
HOXD8	-3.78308	0.000304471	0.00629315	Female
BAT2L1	-3.78219	0.000305381	0.00630537	Female
GREM2	-3.77593	0.000311926	0.00641375	Female
ACACA	-3.77244	0.000315626	0.00647638	Female
TLCD1	-3.77159	0.000316534	0.0064883	Female
PGM5	-3.76836	0.000320002	0.00654182	Female
PIKFYVE	-3.76824	0.000320137	0.00654182	Female
P4HB	-3.76692	0.000321561	0.00655773	Female
WDYHV1	-3.76651	0.000322013	0.00655986	Female
NT5C1A	-3.76521	0.000323428	0.0065626	Female
TOR1AIP2	-3.76601	0.000322558	0.0065626	Female
SORBS1	-3.76054	0.000328569	0.00664556	Female
CLDN19	-3.75871	0.000330599	0.00665262	Female
RHOBTB1	-3.75512	0.000334631	0.00672012	Female
JPH2	-3.75085	0.000339474	0.00679668	Female
ABTB1	-3.74897	0.000341631	0.00681919	Female
ITGA2	-3.74637	0.000344639	0.00686539	Female
RBM9	-3.74538	0.000345784	0.00687349	Female
TMEM97	-3.74372	0.000347721	0.00689903	Female
HNRNPM	-3.74323	0.000348296	0.00689942	Female
CCNI2	-3.74226	0.000349436	0.00690538	Female
REEP2	-3.74064	0.000351349	0.00691432	Female
RFX5	-3.74094	0.000350984	0.00691432	Female
MCM3APAS	-3.73973	0.000352415	0.00692279	Female
CDHR1	-3.73344	0.000359952	0.00702901	Female
SERPINA12	-3.73202	0.000361669	0.00705558	Female
SNX10	-3.73075	0.000363218	0.00707186	Female
PRPSAP2	-3.72973	0.000364459	0.00708906	Female
NOTUM	-3.72459	0.000370801	0.00719827	Female
ALDH1B1	-3.72099	0.000375307	0.00726437	Female
NPC1	-3.71813	0.000378925	0.00731295	Female
C21orf122	-3.71771	0.000379453	0.007313	Female
TRMT2A	-3.71519	0.000382677	0.00735668	Female
KLF6	-3.71362	0.000384696	0.00738833	Female
PDZK1	-3.71235	0.000386338	0.00741268	Female
CHL1	-3.71086	0.00038827	0.00741499	Female
PIGF	-3.71081	0.000388331	0.00741499	Female
SPPL2A	-3.71113	0.000387911	0.00741499	Female
NPLOC4	-3.70861	0.000391204	0.00745799	Female
CCDC106	-3.70558	0.000395179	0.00752399	Female
RTN4R	-3.70439	0.000396762	0.00754686	Female
SPTAN1	-3.70112	0.000401124	0.00761521	Female
SLC4A1	-3.69834	0.000404866	0.00765688	Female
LAMB2L	-3.69614	0.00040785	0.00770595	Female
GGNBP2	-3.69218	0.000413271	0.00775737	Female
TAF4B	-3.69255	0.000412764	0.00775737	Female
RHOU	-3.68728	0.000420088	0.00786779	Female
CRAT	-3.68612	0.000421717	0.0078852	Female
KIAA1024	-3.68554	0.000422536	0.00789305	Female
IARS2	-3.68489	0.000423447	0.00790261	Female
SV2C	-3.68338	0.000425584	0.00793501	Female
FAM117A	-3.68266	0.000426611	0.00794669	Female
APOB	-3.67804	0.000433222	0.00803958	Female
NUP50	-3.67764	0.000433797	0.00804272	Female
CCDC142	-3.67426	0.000438717	0.00811114	Female
UMPS	-3.6746	0.000438217	0.00811114	Female
MTMR4	-3.67325	0.00044019	0.00811278	Female
SPRR2A	-3.67308	0.000440435	0.00811278	Female
PPPDE1	-3.67179	0.000442339	0.00813254	Female
METTL9	-3.67033	0.000444492	0.00815811	Female
YME1L1	-3.67022	0.000444649	0.00815811	Female
KLHL22	-3.6693	0.000446005	0.0081696	Female
TOMM20	-3.66777	0.000448291	0.00819632	Female
PLEKHB2	-3.66694	0.000449523	0.00820368	Female
GTPBP4	-3.66466	0.000452939	0.00823351	Female
RASSF3	-3.6648	0.000452725	0.00823351	Female
MYH4	-3.66346	0.000454747	0.00824582	Female
WSCD1	-3.66369	0.000454407	0.00824582	Female
SLC25A1	-3.66115	0.000458249	0.00828657	Female
CDK5RAP2	-3.66053	0.000459201	0.00828865	Female
ASGR1	-3.65639	0.000465544	0.00833774	Female
RHBDL3	-3.65638	0.000465568	0.00833774	Female
SLC25A25	-3.65629	0.000465711	0.00833774	Female
KLHL5	-3.65558	0.000466812	0.0083448	Female
ISG20L2	-3.65412	0.000469072	0.00836766	Female
PDCD11	-3.65134	0.000473421	0.00843074	Female
RANBP9	-3.65131	0.00047346	0.00843074	Female
PARP1	-3.64986	0.000475742	0.00846376	Female
PIP5KL1	-3.64658	0.000480939	0.00854088	Female
LOC729082	-3.64564	0.000482444	0.00855227	Female
SSPN	-3.64303	0.000486627	0.0086033	Female
CIT	-3.63982	0.000491832	0.00867612	Female
MYADM	-3.63863	0.000493765	0.00869843	Female
HAO2	-3.63634	0.00049753	0.0087492	Female
LRRC36	-3.63568	0.000498612	0.00876044	Female
STARD7	-3.63274	0.000503483	0.00880695	Female
SLC23A2	-3.6292	0.000509405	0.00890267	Female
ID2B	-3.62854	0.000510515	0.00890634	Female
RNASE4	-3.62878	0.000510118	0.00890634	Female
GTF3C4	-3.62775	0.000511856	0.00891764	Female
CAND2	-3.62686	0.000513367	0.0089325	Female
RNF141	-3.62503	0.000516471	0.00897075	Female
C22orf39	-3.62268	0.000520493	0.00901808	Female
LOC730101	-3.62264	0.000520563	0.00901808	Female
TUBB2A	-3.62085	0.000523636	0.00906338	Female
WFIKKN2	-3.61852	0.000527681	0.00910158	Female
LGALS14	-3.6163	0.000531558	0.0091525	Female
IER3IP1	-3.6139	0.000535783	0.0091969	Female
ZDHHC20	-3.60987	0.000542934	0.0092838	Female
RAD51C	-3.60828	0.000545798	0.00930865	Female
BOK	-3.60657	0.000548868	0.00933688	Female
SLC25A17	-3.60676	0.000548525	0.00933688	Female
ZP1	-3.60205	0.000557099	0.00945255	Female
C22orf30	-3.60013	0.000560629	0.00948437	Female
CYP4F2	-3.60045	0.000560025	0.00948437	Female
FAM178A	-3.5994	0.000561974	0.00948613	Female
ZNF148	-3.59967	0.000561477	0.00948613	Female
ZNF521	-3.59915	0.000562432	0.00948613	Female
SFRP1	-3.59825	0.000564103	0.00950621	Female
KIAA0284	-3.59595	0.000568377	0.00952589	Female
DPP10	-3.59513	0.000569919	0.00953928	Female
NOV	-3.59401	0.000572006	0.00956612	Female
LOC286002	-3.5934	0.000573167	0.00957746	Female
OBFC1	-3.59213	0.000575554	0.00960113	Female
GLI3	-3.59059	0.000578478	0.00962558	Female
LOC284837	-3.59072	0.000578227	0.00962558	Female
DACT2	-3.58827	0.000582893	0.00967251	Female
HACL1	-3.58845	0.000582547	0.00967251	Female
MMADHC	-3.58808	0.000583252	0.00967251	Female
ZNF407	-3.5865	0.000586291	0.00971477	Female
KCTD18	-3.58607	0.00058711	0.00972021	Female
AP1M2	-3.58245	0.000594123	0.0098117	Female
FTSJ3	-3.58087	0.000597213	0.0098463	Female
ATP10D	-3.58002	0.000598886	0.00985747	Female
MYC	-3.57964	0.000599613	0.00986125	Female
MTOR	-3.57151	0.00061579	0.0100938	Female
LOC729176	-3.57103	0.000616763	0.0101013	Female
AQP2	-3.56978	0.000619294	0.0101261	Female
TMEM123	-3.56991	0.000619037	0.0101261	Female
C22orf28	-3.56735	0.000624234	0.0101897	Female
TMEM63A	-3.56265	0.0006339	0.0103053	Female
FAM86B2	-3.56227	0.000634694	0.0103095	Female
ADNP2	-3.56078	0.000637783	0.0103345	Female
KIF7	-3.55908	0.000641337	0.0103655	Female
KIF1A	-3.55818	0.000643225	0.0103802	Female
DAK	-3.55647	0.000646825	0.0104128	Female
SPOCD1	-3.55601	0.00064779	0.0104199	Female
IFFO2	-3.55443	0.000651135	0.0104652	Female
RASGEF1A	-3.5498	0.000661058	0.0105921	Female
GDF2	-3.549	0.00066277	0.0106006	Female
HSPA8	-3.5479	0.000665158	0.0106302	Female
LDLRAD1	-3.54669	0.000667779	0.0106549	Female
GALNT9	-3.54589	0.000669535	0.0106743	Female
LOC220429	-3.54325	0.0006753	0.0107537	Female
CHRNA4	-3.54058	0.000681192	0.010782	Female
MS4A15	-3.54008	0.000682306	0.010786	Female
PITRM1	-3.53998	0.000682533	0.010786	Female
POLR2A	-3.53889	0.000684967	0.0108158	Female
CCDC93	-3.53651	0.000690283	0.0108911	Female
ABHD8	-3.5345	0.00069482	0.0109333	Female
SLC22A17	-3.53447	0.000694876	0.0109333	Female
KCNMB4	-3.53206	0.000700334	0.0109797	Female
EXTL2	-3.53148	0.000701674	0.010992	Female
RPL23AP82	-3.52968	0.000705783	0.0110389	Female
SERHL2	-3.52799	0.000709655	0.0110602	Female
TIMP4	-3.52814	0.000709327	0.0110602	Female
NCAN	-3.52735	0.000711134	0.0110701	Female
CLN8	-3.52368	0.000719655	0.0111306	Female
GATA3	-3.52342	0.000720269	0.0111306	Female
SFTPC	-3.52508	0.000716394	0.0111306	Female
TNFRSF13C	-3.52404	0.000718833	0.0111306	Female
BMS1	-3.52136	0.000725109	0.0111542	Female
HIF1AN	-3.5212	0.000725477	0.0111542	Female
MYH7B	-3.52117	0.000725552	0.0111542	Female
NR4A3	-3.52197	0.000723675	0.0111542	Female
HBP1	-3.51839	0.000732122	0.0112465	Female
EIF4EBP2	-3.51223	0.00074689	0.0114379	Female
TTC3	-3.50849	0.000755983	0.0115503	Female
AXIN2	-3.50825	0.000756579	0.0115505	Female
TEX10	-3.50743	0.000758572	0.011572	Female
CPT2	-3.50716	0.000759258	0.0115736	Female
JARID2	-3.50284	0.000769942	0.0117004	Female
TRIM25	-3.50131	0.000773752	0.0117403	Female
UBR1	-3.50005	0.000776899	0.011761	Female
NOL9	-3.49912	0.000779259	0.0117877	Female
ERMP1	-3.49859	0.000780583	0.0117928	Female
SETD7	-3.49482	0.000790154	0.011898	Female
SCYL3	-3.49427	0.000791565	0.0119011	Female
SMURF2	-3.49431	0.000791456	0.0119011	Female
ALS2CL	-3.49372	0.00079297	0.0119024	Female
NOS1AP	-3.49329	0.000794057	0.0119024	Female
CYP51A1	-3.49304	0.0007947	0.0119031	Female
NELF	-3.49232	0.000796561	0.0119219	Female
TMEM177	-3.49204	0.000797283	0.0119237	Female
TMEM131	-3.49116	0.00079954	0.0119485	Female
SHB	-3.48802	0.000807691	0.012043	Female
ESCO1	-3.48759	0.000808807	0.0120506	Female
PSD	-3.48652	0.000811606	0.0120741	Female
STK24	-3.48592	0.000813165	0.0120882	Female
STAM2	-3.48498	0.000815632	0.0121158	Female
SH3BP5	-3.4835	0.000819545	0.0121557	Female
CDHR5	-3.48321	0.000820309	0.0121579	Female
PRKAB1	-3.48208	0.000823307	0.0121841	Female
APOA1	-3.48077	0.000826786	0.0122023	Female
SFTPD	-3.48032	0.000827965	0.0122023	Female
TMEM184B	-3.48046	0.000827607	0.0122023	Female
ZCCHC12	-3.48022	0.000828235	0.0122023	Female
LHB	-3.47965	0.000829767	0.012206	Female
ZNF711	-3.47513	0.000841925	0.0123215	Female
ALPL	-3.47311	0.000847423	0.0123745	Female
MRPL46	-3.46958	0.000857089	0.012458	Female
PERP	-3.4658	0.000867569	0.0125575	Female
GOLGA7B	-3.46423	0.000871967	0.0125844	Female
GPRC6A	-3.46352	0.000873937	0.0125945	Female
CDH10	-3.4631	0.000875139	0.0126026	Female
INVS	-3.45926	0.000885991	0.0127311	Female
TMEM191A	-3.45854	0.000888044	0.0127514	Female
C20orf195	-3.45816	0.000889105	0.0127574	Female
FLVCR2	-3.45759	0.000890756	0.0127718	Female
C7orf51	-3.45467	0.000899117	0.0128359	Female
LRRC2	-3.45335	0.00090294	0.0128812	Female
NBPF10	-3.45205	0.000906698	0.0129255	Female
HADHA	-3.44891	0.000915886	0.0130377	Female
PPP2R3C	-3.44742	0.000920264	0.0130718	Female
RNF168	-3.4463	0.00092357	0.0131	Female
LTB4R2	-3.44468	0.000928365	0.0131304	Female
NUDT17	-3.44511	0.000927081	0.0131304	Female
DGCR5	-3.44282	0.000933904	0.0131899	Female
PHC2	-3.44154	0.000937735	0.0132346	Female
ATXN1	-3.44089	0.000939693	0.0132372	Female
MYH1	-3.44042	0.000941109	0.01324	Female
GART	-3.43793	0.000948635	0.0133219	Female
SEPT5	-3.43435	0.000959559	0.0134277	Female
CNGA3	-3.43196	0.000966918	0.0134906	Female
CTAGE5	-3.42823	0.000978483	0.0136347	Female
TATDN2	-3.4265	0.000983923	0.0136913	Female
ACTR1B	-3.42524	0.000987861	0.0137364	Female
ANG	-3.42465	0.000989728	0.0137429	Female
YY1AP1	-3.42459	0.000989923	0.0137429	Female
C4orf12	-3.42236	0.000996986	0.0137858	Female
PPRC1	-3.41828	0.00101003	0.0139079	Female
RGS9BP	-3.41868	0.00100874	0.0139079	Female
LOC646627	-3.416	0.00101741	0.0139901	Female
ERO1LB	-3.41555	0.00101885	0.0140002	Female
STX5	-3.41226	0.00102957	0.0141102	Female
SERPINA13	-3.41054	0.00103524	0.0141762	Female
GNB3	-3.4098	0.00103768	0.0141901	Female
DYNLL2	-3.40876	0.0010411	0.0142185	Female
HNRPLL	-3.40714	0.0010465	0.0142712	Female
UTS2D	-3.40608	0.00105002	0.0143094	Female
C2CD2	-3.40306	0.00106016	0.0144079	Female
COL18A1	-3.40307	0.0010601	0.0144079	Female
AKR7A2	-3.4017	0.00106473	0.0144304	Female
RAB11FIP5	-3.3998	0.00107119	0.014508	Female
SLC39A10	-3.39555	0.00108574	0.014655	Female
ZSWIM4	-3.39393	0.00109132	0.0147202	Female
NCEH1	-3.3903	0.00110395	0.0148703	Female
DOC2B	-3.38969	0.00110609	0.0148829	Female
BCL11B	-3.38914	0.00110801	0.0148845	Female
NGFR	-3.38931	0.00110744	0.0148845	Female
C10orf114	-3.38854	0.00111012	0.0148925	Female
CDH12	-3.38829	0.001111	0.0148925	Female
TUBB4Q	-3.38812	0.00111162	0.0148925	Female
TTC30B	-3.38789	0.00111241	0.014893	Female
HSPA13	-3.38751	0.00111376	0.0149011	Female
DDX1	-3.38714	0.00111508	0.0149087	Female
UBIAD1	-3.38615	0.00111858	0.014941	Female
GGA1	-3.38488	0.00112308	0.0149751	Female
BTN2A2	-3.38443	0.0011247	0.014984	Female
FCRLB	-3.3816	0.00113482	0.015091	Female
KCNK3	-3.37897	0.00114429	0.015166	Female
USP14	-3.37907	0.00114392	0.015166	Female
HOXD13	-3.3768	0.00115216	0.0152398	Female
EPO	-3.37451	0.00116056	0.0153208	Female
PSEN2	-3.37351	0.00116422	0.0153583	Female
NTM	-3.36987	0.00117768	0.0154903	Female
TEDDM1	-3.36975	0.00117812	0.0154903	Female
CHRNA3	-3.36837	0.00118329	0.0155378	Female
TRIM37	-3.36704	0.00118826	0.0155819	Female
TWSG1	-3.36611	0.00119173	0.0155965	Female
XKR5	-3.36628	0.0011911	0.0155965	Female
ETFA	-3.36516	0.00119532	0.015633	Female
NFATC4	-3.3648	0.00119667	0.0156404	Female
LOC729020	-3.36295	0.00120369	0.0156964	Female
MBL2	-3.35648	0.00122848	0.0158961	Female
SGK196	-3.3552	0.00123346	0.015932	Female
GMFB	-3.35445	0.00123638	0.0159504	Female
NF2	-3.35438	0.00123662	0.0159504	Female
POLE3	-3.354	0.00123811	0.0159504	Female
PNO1	-3.35285	0.0012426	0.0159928	Female
ENPP7	-3.35222	0.00124508	0.015993	Female
MYH10	-3.35091	0.00125023	0.0160232	Female
DCBLD2	-3.34995	0.001254	0.0160587	Female
FAM89A	-3.34863	0.00125921	0.0160979	Female
IGSF5	-3.34861	0.00125931	0.0160979	Female
C9orf30	-3.34678	0.00126656	0.0161489	Female
PTPN9	-3.34637	0.00126821	0.0161555	Female
LOC90784	-3.34583	0.00127038	0.0161559	Female
PDHX	-3.34337	0.00128021	0.0162542	Female
INPP5B	-3.34237	0.00128424	0.0162799	Female
PYCR2	-3.34244	0.00128396	0.0162799	Female
LOC151162	-3.34081	0.00129058	0.0163289	Female
RHBDD1	-3.34059	0.00129147	0.0163297	Female
C22orf9	-3.34006	0.00129361	0.0163464	Female
ATP6V1E1	-3.33917	0.00129721	0.0163814	Female
TBCEL	-3.33768	0.0013033	0.0164164	Female
TSN	-3.33797	0.00130211	0.0164164	Female
SRL	-3.33585	0.00131082	0.0165006	Female
AMMECR1L	-3.33475	0.00131535	0.0165401	Female
SLC17A7	-3.33468	0.00131563	0.0165401	Female
NBAS	-3.33354	0.00132036	0.0165891	Female
ZNF516	-3.33251	0.00132464	0.0166323	Female
SAPS2	-3.33051	0.00133297	0.0167157	Female
LRRC42	-3.32983	0.00133582	0.0167345	Female
PGAM4	-3.32975	0.00133616	0.0167345	Female
NOD2	-3.32855	0.00134116	0.0167865	Female
LOC100133612	-3.32771	0.00134471	0.0167992	Female
C2orf14	-3.3274	0.00134602	0.0168049	Female
ARHGAP32	-3.32299	0.00136473	0.0169957	Female
MGC57346	-3.32232	0.00136759	0.0170162	Female
C9orf125	-3.32021	0.00137666	0.0170264	Female
HLF	-3.32037	0.00137596	0.0170264	Female
PXK	-3.32165	0.00137049	0.0170264	Female
REN	-3.32135	0.00137177	0.0170264	Female
RNF20	-3.32034	0.00137611	0.0170264	Female
C3orf20	-3.31946	0.00137989	0.0170557	Female
ZBTB7C	-3.3189	0.00138233	0.0170645	Female
F12	-3.31812	0.00138567	0.0170739	Female
LRRC37B2	-3.31822	0.00138527	0.0170739	Female
UPF2	-3.31851	0.00138402	0.0170739	Female
C1orf131	-3.31754	0.00138823	0.0170841	Female
MYO18B	-3.31627	0.00139374	0.0171306	Female
C1orf226	-3.31358	0.00140552	0.0172648	Female
AKAP12	-3.31304	0.00140786	0.0172722	Female
GCNT4	-3.31304	0.00140787	0.0172722	Female
DDB1	-3.31282	0.00140884	0.0172734	Female
ILF2	-3.3111	0.00141645	0.0173255	Female
CADM1	-3.31006	0.00142103	0.0173572	Female
E2F6	-3.30981	0.00142215	0.0173572	Female
CLPX	-3.3086	0.00142756	0.0173738	Female
BIRC6	-3.30605	0.00143897	0.0174583	Female
CYP26B1	-3.30627	0.00143796	0.0174583	Female
KATNA1	-3.3067	0.00143601	0.0174583	Female
TMEM120B	-3.30571	0.00144046	0.0174583	Female
CALM2	-3.30359	0.00145005	0.0175183	Female
XPA	-3.30338	0.00145098	0.0175189	Female
FBXW2	-3.30227	0.001456	0.0175367	Female
MOSPD3	-3.30257	0.00145467	0.0175367	Female
SMCP	-3.30155	0.00145929	0.0175656	Female
ERLEC1	-3.3009	0.00146225	0.0175906	Female
USH1C	-3.30042	0.00146444	0.0176062	Female
ACTR8	-3.29771	0.00147685	0.0177231	Female
HPX	-3.29727	0.00147888	0.0177308	Female
ARF4	-3.29693	0.00148045	0.017734	Female
LIPA	-3.29571	0.00148609	0.0177694	Female
RIC8A	-3.29549	0.00148712	0.017771	Female
TCF7	-3.29434	0.00149246	0.017824	Female
GNA11	-3.2929	0.00149917	0.0178718	Female
LOC648691	-3.28975	0.00151392	0.0180151	Female
ULBP3	-3.28848	0.0015199	0.0180474	Female
LRP11	-3.28081	0.00155658	0.0183853	Female
PEG10	-3.28124	0.00155451	0.0183853	Female
TRIB2	-3.2807	0.0015571	0.0183853	Female
CCDC83	-3.28028	0.00155916	0.0183886	Female
ZNF70	-3.27568	0.00158157	0.0186036	Female
GRK7	-3.27441	0.00158784	0.0186592	Female
ADAM17	-3.27293	0.00159511	0.0187153	Female
CACNA1S	-3.27149	0.00160229	0.0187524	Female
CXorf38	-3.27146	0.0016024	0.0187524	Female
HMGCS2	-3.26665	0.0016265	0.0189787	Female
ZC3HAV1	-3.26664	0.00162652	0.0189787	Female
SMAD4	-3.26286	0.0016457	0.0191617	Female
UCHL5	-3.26278	0.00164608	0.0191617	Female
RERE	-3.26229	0.00164858	0.0191683	Female
ZZEF1	-3.26027	0.00165891	0.019277	Female
QSER1	-3.26002	0.00166022	0.019281	Female
FABP4	-3.25926	0.00166411	0.0192991	Female
MAPKAP1	-3.25915	0.00166471	0.0192991	Female
CREBZF	-3.2583	0.00166908	0.0193384	Female
QPCT	-3.25709	0.00167534	0.0193656	Female
ITGB5	-3.25647	0.00167854	0.0193801	Female
KCNJ12	-3.25491	0.00168668	0.0194513	Female
C18orf8	-3.25404	0.00169119	0.0194807	Female
FDFT1	-3.25354	0.00169379	0.0194992	Female
ARL8A	-3.25289	0.0016972	0.0195159	Female
BRD3	-3.25241	0.00169971	0.0195253	Female
TRIM45	-3.25236	0.0017	0.0195253	Female
CLCN2	-3.2513	0.00170558	0.0195667	Female
POM121L9P	-3.25058	0.00170939	0.0195813	Female
ATL1	-3.24859	0.0017199	0.0196514	Female
DDX31	-3.24715	0.00172758	0.0196954	Female
SEC23A	-3.24693	0.00172873	0.0196954	Female
TMTC1	-3.24708	0.00172792	0.0196954	Female
PLIN4	-3.24583	0.0017346	0.0197509	Female
ACBD3	-3.2443	0.00174281	0.0198102	Female
TBC1D22A	-3.24312	0.00174917	0.019837	Female
CCT4	-3.24204	0.00175501	0.019869	Female
LTBP1	-3.24239	0.0017531	0.019869	Female
TADA2A	-3.24158	0.00175748	0.0198847	Female
USP12	-3.24141	0.0017584	0.0198847	Female
LONRF3	-3.23958	0.00176834	0.0199516	Female
RPS6KA1	-3.23863	0.00177356	0.019999	Female
VSIG10	-3.238	0.00177702	0.0200267	Female
PITPNM1	-3.23592	0.00178842	0.0201094	Female
RHPN2	-3.23568	0.00178972	0.0201126	Female
SMYD2	-3.23417	0.00179808	0.0201607	Female
CERCAM	-3.23186	0.0018109	0.0202534	Female
PLD5	-3.23176	0.00181147	0.0202534	Female
NR1H3	-3.23047	0.00181865	0.0203109	Female
AIFM3	-3.22945	0.00182441	0.020347	Female
NDUFS2	-3.22888	0.00182756	0.0203644	Female
FBXL18	-3.22826	0.00183107	0.0203921	Female
MYL12A	-3.22478	0.00185074	0.0205417	Female
ZKSCAN3	-3.2244	0.00185294	0.0205432	Female
NUP210	-3.22326	0.00185943	0.0205938	Female
PRRT4	-3.22251	0.0018637	0.0206214	Female
DDX21	-3.21908	0.00188344	0.0207719	Female
ROD1	-3.21966	0.00188008	0.0207719	Female
SFRP5	-3.21836	0.00188764	0.0207998	Female
IGF2BP1	-3.21724	0.00189411	0.0208581	Female
SYDE2	-3.21708	0.00189504	0.0208581	Female
ADAM19	-3.21637	0.00189918	0.0208804	Female
EIF2S1	-3.21565	0.00190336	0.0209032	Female
SESN3	-3.21462	0.00190937	0.020946	Female
EDN3	-3.21055	0.00193335	0.0211738	Female
GIP	-3.20471	0.00196825	0.0214761	Female
LARGE	-3.20456	0.00196917	0.0214761	Female
SALL2	-3.20448	0.00196963	0.0214761	Female
NAV1	-3.20346	0.00197579	0.0215108	Female
PRPF40A	-3.20304	0.00197832	0.0215116	Female
C1orf203	-3.20191	0.00198517	0.0215743	Female
MIP	-3.20034	0.00199472	0.0216302	Female
MYL3	-3.20017	0.00199578	0.0216302	Female
LOC728606	-3.19832	0.00200709	0.0216652	Female
SMCR8	-3.19849	0.00200605	0.0216652	Female
SPON1	-3.19815	0.00200818	0.0216652	Female
UST	-3.19789	0.00200977	0.0216652	Female
WNT4	-3.19905	0.00200262	0.0216652	Female
ISM1	-3.19764	0.00201131	0.0216681	Female
POU4F1	-3.19744	0.00201252	0.0216693	Female
GATA4	-3.19669	0.00201715	0.0216955	Female
PPP3R1	-3.19558	0.00202398	0.0217415	Female
UGP2	-3.19546	0.00202472	0.0217415	Female
ALAS1	-3.19226	0.00204459	0.0218834	Female
DLGAP1	-3.19288	0.00204075	0.0218834	Female
HSD17B7	-3.19209	0.00204567	0.0218834	Female
IWS1	-3.19212	0.00204547	0.0218834	Female
GTPBP1	-3.19036	0.00205653	0.0219404	Female
FGF12	-3.18959	0.00206137	0.0219784	Female
SRRD	-3.18944	0.00206231	0.0219784	Female
ATF6	-3.18861	0.00206752	0.0220102	Female
MEGF9	-3.18775	0.00207294	0.022056	Female
PCSK6	-3.18664	0.00207996	0.0221188	Female
CHRD	-3.18567	0.00208617	0.0221254	Female
CLDN1	-3.18598	0.00208414	0.0221254	Female
MGAT5	-3.18586	0.00208495	0.0221254	Female
PRAMEF14	-3.18483	0.00209151	0.0221585	Female
RTP3	-3.18465	0.00209264	0.0221585	Female
SORBS2	-3.18391	0.00209735	0.0221847	Female
NEU4	-3.18336	0.00210086	0.0222099	Female
IL10RB	-3.18204	0.00210938	0.0222762	Female
LOC441089	-3.18206	0.00210925	0.0222762	Female
TRABD	-3.18041	0.00211985	0.0223391	Female
ZBTB5	-3.17957	0.0021253	0.0223846	Female
CRMP1	-3.17798	0.00213558	0.0223857	Female
MEIS3P1	-3.17919	0.00212773	0.0223857	Female
GEFT	-3.17705	0.00214165	0.0224256	Female
SUV39H2	-3.1772	0.0021407	0.0224256	Female
SIDT2	-3.1751	0.00215438	0.0225112	Female
EPB41L4B	-3.17489	0.00215579	0.0225141	Female
ITGA8	-3.17395	0.00216193	0.0225544	Female
PDXP	-3.17313	0.00216738	0.0225875	Female
SNORD115-13	-3.17028	0.00218622	0.022736	Female
EHBP1	-3.16931	0.00219265	0.0227866	Female
GPATCH4	-3.1692	0.00219339	0.0227866	Female
FAM134A	-3.16861	0.00219734	0.022809	Female
DHX30	-3.16833	0.0021992	0.0228111	Female
ICAM5	-3.16585	0.00221583	0.022938	Female
DVWA	-3.16317	0.00223392	0.0230815	Female
ISCA1P1	-3.16311	0.00223436	0.0230815	Female
CAMTA2	-3.15938	0.0022598	0.0233175	Female
GOLGA6A	-3.15789	0.00227005	0.0233746	Female
SP5	-3.15766	0.0022716	0.0233784	Female
TRAPPC6A	-3.15731	0.00227405	0.0233792	Female
SDF2	-3.15573	0.00228492	0.0234431	Female
ABCB6	-3.15359	0.00229982	0.023577	Female
CDC42BPB	-3.1535	0.00230042	0.023577	Female
ISCA1	-3.15256	0.00230701	0.0236322	Female
MLLT6	-3.1521	0.00231023	0.023653	Female
TM9SF3	-3.15189	0.00231164	0.0236552	Female
RPH3AL	-3.15117	0.0023167	0.0236948	Female
ID2	-3.15063	0.00232049	0.0237213	Female
AUTS2	-3.1501	0.00232425	0.0237352	Female
KCTD1	-3.14895	0.00233235	0.0237933	Female
ADAM10	-3.14848	0.00233568	0.023815	Female
GIGYF2	-3.1481	0.00233837	0.0238234	Female
PANK1	-3.14667	0.00234853	0.0238234	Female
TGFBRAP1	-3.14745	0.00234292	0.0238234	Female
FAM10A4	-3.14596	0.00235357	0.0238622	Female
MAP2K5	-3.14479	0.00236191	0.0239003	Female
MYEOV	-3.14467	0.00236276	0.0239003	Female
SLC2A6	-3.14442	0.00236456	0.0239003	Female
GAL3ST3	-3.14344	0.00237157	0.0239467	Female
RBM8A	-3.14218	0.00238059	0.0240256	Female
RBM7	-3.14171	0.00238395	0.024035	Female
PRKAB2	-3.13938	0.00240081	0.024168	Female
TMPRSS6	-3.13392	0.00244076	0.0244706	Female
NCRNA00189	-3.13352	0.00244367	0.0244874	Female
VPS37D	-3.13312	0.00244664	0.0244923	Female
HSD3B2	-3.13289	0.00244836	0.0244972	Female
AAMP	-3.13144	0.00245905	0.0245705	Female
BRSK1	-3.13011	0.00246896	0.0246026	Female
CUL3	-3.12965	0.00247241	0.0246026	Female
FAM189B	-3.13001	0.00246968	0.0246026	Female
URB1	-3.12944	0.00247392	0.0246038	Female
CDC14C	-3.129	0.00247722	0.0246242	Female
GATAD2B	-3.12791	0.00248538	0.0246929	Female
TM7SF3	-3.12756	0.00248799	0.0247065	Female
QSOX1	-3.12704	0.00249188	0.0247322	Female
CTDSP2	-3.12558	0.00250289	0.0248171	Female
PHLDB1	-3.12468	0.00250967	0.0248718	Female
NCRNA00235	-3.12393	0.00251536	0.0249158	Female
COL2A1	-3.12267	0.00252491	0.0249854	Female
MAP4K2	-3.1225	0.0025262	0.0249857	Female
CRKL	-3.12168	0.00253249	0.0250104	Female
USP37	-3.1218	0.00253152	0.0250104	Female
EBF4	-3.12099	0.00253771	0.0250377	Female
TRH	-3.12002	0.00254513	0.0250852	Female
PLD6	-3.11849	0.00255688	0.0251609	Female
ZNF410	-3.11743	0.00256505	0.0252187	Female
FAM86B1	-3.11725	0.00256645	0.0252199	Female
WDFY3	-3.11677	0.00257016	0.0252439	Female
URB2	-3.11622	0.00257439	0.0252604	Female
CABLES1	-3.11576	0.00257794	0.0252647	Female
HAPLN4	-3.11598	0.00257626	0.0252647	Female
IFI27	-3.11387	0.00259264	0.0253266	Female
SGSM3	-3.11407	0.0025911	0.0253266	Female
NUP88	-3.11275	0.00260139	0.0253555	Female
OR14I1	-3.11225	0.00260535	0.0253682	Female
HERC2	-3.11064	0.00261798	0.0253998	Female
POLR1B	-3.11062	0.0026181	0.0253998	Female
TSNAX	-3.10996	0.00262327	0.0254251	Female
ATG9A	-3.10748	0.00264288	0.025565	Female
GTF3C3	-3.10651	0.00265059	0.0256021	Female
C14orf70	-3.10498	0.00266279	0.0256919	Female
SERPINA9	-3.10486	0.00266377	0.0256919	Female
SOAT1	-3.10411	0.00266975	0.0257206	Female
GLRX	-3.10374	0.00267275	0.0257283	Female
KIAA1826	-3.10294	0.00267915	0.0257774	Female
CELA2A	-3.1002	0.00270123	0.0259394	Female
C14orf104	-3.09906	0.00271051	0.0259997	Female
MCFD2	-3.09911	0.00271005	0.0259997	Female
DCAF4	-3.09825	0.00271711	0.0260287	Female
ESPNL	-3.09683	0.00272863	0.0261139	Female
MMEL1	-3.09602	0.00273525	0.0261489	Female
RHCE	-3.0959	0.00273625	0.0261489	Female
FOXN4	-3.09573	0.00273765	0.0261497	Female
TTLL1	-3.0955	0.00273952	0.0261548	Female
DRG1	-3.09384	0.00275318	0.0262356	Female
LOC148709	-3.09382	0.00275333	0.0262356	Female
QRICH1	-3.09282	0.00276163	0.02629	Female
USP32	-3.09223	0.00276649	0.0263109	Female
ZFAND1	-3.09196	0.00276873	0.0263196	Female
LTB4R	-3.09159	0.00277181	0.0263362	Female
MARS2	-3.09137	0.00277364	0.0263409	Female
EIF3J	-3.08944	0.00278969	0.0264807	Female
GNPAT	-3.08426	0.00283317	0.0266944	Female
NYNRIN	-3.08484	0.00282829	0.0266944	Female
CLTC	-3.08402	0.00283526	0.0266956	Female
CYB5R1	-3.08343	0.00284022	0.0267296	Female
HDAC4	-3.08151	0.00285656	0.0268452	Female
C7orf52	-3.08085	0.00286219	0.0268727	Female
ACP1	-3.0785	0.00288232	0.0270069	Female
C3orf18	-3.07839	0.00288332	0.0270069	Female
TXNRD3IT1	-3.07518	0.00291107	0.0272154	Female
GANAB	-3.07498	0.00291279	0.0272186	Female
POLR3A	-3.07269	0.00293268	0.0273653	Female
NKD1	-3.0719	0.00293964	0.027392	Female
RFX7	-3.07147	0.00294337	0.0274122	Female
GP5	-3.07078	0.00294947	0.027419	Female
INTS5	-3.07083	0.00294898	0.027419	Female
H1F0	-3.07061	0.00295092	0.0274196	Female
NTNG2	-3.06925	0.00296295	0.027454	Female
WDR45L	-3.0693	0.0029625	0.027454	Female
OPRL1	-3.06893	0.00296574	0.0274671	Female
C11orf90	-3.06752	0.00297827	0.0275574	Female
PRSS35	-3.0673	0.00298014	0.0275618	Female
GPR137B	-3.06679	0.0029847	0.0275778	Female
LRTM1	-3.06664	0.00298605	0.0275778	Female
SCARB1	-3.0651	0.00299977	0.0276658	Female
TMEM79	-3.06371	0.00301217	0.0277543	Female
HADHB	-3.063	0.00301853	0.0278	Female
ZNF503	-3.06163	0.00303092	0.0279011	Female
MERTK	-3.05965	0.00304882	0.0280398	Female
CGRRF1	-3.059	0.00305464	0.0280803	Female
LOC285033	-3.05845	0.00305971	0.0281008	Female
SLC28A2	-3.05796	0.00306412	0.0281152	Female
CHRFAM7A	-3.05607	0.00308133	0.0282209	Female
RALGPS1	-3.05644	0.003078	0.0282209	Female
RFT1	-3.05621	0.00308006	0.0282209	Female
STXBP1	-3.05426	0.00309801	0.0283081	Female
SDHC	-3.05388	0.00310152	0.0283087	Female
TCF20	-3.05347	0.00310522	0.0283087	Female
BMPR2	-3.05292	0.00311037	0.0283209	Female
ZNF462	-3.05286	0.00311086	0.0283209	Female
CELF4	-3.05104	0.00312774	0.0284485	Female
ROM1	-3.04919	0.00314493	0.0285786	Female
COX15	-3.04558	0.00317875	0.0288198	Female
SORCS1	-3.04496	0.0031846	0.0288464	Female
ARHGAP12	-3.04063	0.00322574	0.0291524	Female
AAK1	-3.04022	0.00322962	0.0291741	Female
TMEM218	-3.03941	0.00323735	0.0292307	Female
ADSS	-3.03894	0.00324192	0.0292548	Female
FMO1	-3.03679	0.00326254	0.0293644	Female
LOC284233	-3.037	0.0032606	0.0293644	Female
SLC16A13	-3.03688	0.00326174	0.0293644	Female
PKDREJ	-3.03567	0.00327346	0.0294493	Female
EIF3A	-3.03343	0.00329521	0.0295538	Female
PRAME	-3.03297	0.00329963	0.0295538	Female
VKORC1L1	-3.03373	0.00329225	0.0295538	Female
WDR37	-3.03293	0.00329999	0.0295538	Female
PEA15	-3.03276	0.00330166	0.0295553	Female
UBE2G1	-3.02893	0.00333926	0.0298379	Female
RAB15	-3.02778	0.0033506	0.0298723	Female
SP2	-3.0261	0.00336724	0.0299527	Female
OBP2B	-3.02492	0.00337902	0.0300171	Female
EHMT1	-3.02389	0.00338934	0.0300548	Female
TRAF5	-3.02197	0.00340854	0.030171	Female
SNX30	-3.02122	0.00341612	0.0302246	Female
PVRL1	-3.02082	0.00342013	0.0302466	Female
SH3RF2	-3.01993	0.00342912	0.030299	Female
PACSIN2	-3.01956	0.00343288	0.0303139	Female
TMEM151A	-3.01946	0.00343387	0.0303139	Female
PTPN7	-3.01905	0.00343804	0.0303372	Female
DOCK7	-3.01319	0.00349788	0.0307283	Female
SMEK2	-3.01217	0.00350838	0.030766	Female
KIF3C	-3.01012	0.00352961	0.03087	Female
TRIP12	-3.00873	0.00354404	0.0309689	Female
C14orf37	-3.00687	0.00356347	0.0310914	Female
PRCC	-3.00684	0.00356384	0.0310914	Female
SELS	-3.00642	0.00356825	0.0311118	Female
HSPA1L	-3.00486	0.00358459	0.0311931	Female
C9orf4	-3.00443	0.00358918	0.0311982	Female
NEIL1	-3.00346	0.0035994	0.0312732	Female
KCTD3	-3.00296	0.00360467	0.0313053	Female
DOLK	-3.00165	0.00361852	0.0314118	Female
KIAA1409	-3.00054	0.00363039	0.0314874	Female
LOC647288	-2.99963	0.00364005	0.0315296	Female
P2RX5	-2.99972	0.00363908	0.0315296	Female
TUBBP5	-2.99894	0.00364746	0.0315721	Female
PEX26	-2.99853	0.00365181	0.03159	Female
DDN	-2.99459	0.00369427	0.0318881	Female
KCNH3	-2.99322	0.00370913	0.0319741	Female
RAC3	-2.99254	0.00371656	0.0319963	Female
CCRL2	-2.99216	0.0037207	0.0320181	Female
SLC1A4	-2.99159	0.00372695	0.0320579	Female
FAM116A	-2.99045	0.00373941	0.0320954	Female
FAM83F	-2.98921	0.00375303	0.0321705	Female
ZIC5	-2.98715	0.00377564	0.03232	Female
WWTR1	-2.98599	0.0037885	0.0323904	Female
KIAA0652	-2.98549	0.00379403	0.0324236	Female
PPP1R16B	-2.98505	0.00379897	0.0324518	Female
PITPNB	-2.98427	0.00380759	0.0325115	Female
DDX18	-2.98235	0.00382908	0.0326527	Female
TUBA8	-2.98187	0.00383448	0.0326616	Female
CNTN2	-2.98147	0.00383889	0.032666	Female
C2orf70	-2.98049	0.00384993	0.0327178	Female
SMARCD1	-2.97966	0.00385925	0.0327548	Female
SF3A1	-2.979	0.00386676	0.0327885	Female
C10orf67	-2.97841	0.00387342	0.0328188	Female
TLK2	-2.97723	0.00388675	0.0329177	Female
TPI1P2	-2.97644	0.00389578	0.03298	Female
CHEK2	-2.97588	0.00390214	0.0330057	Female
LOC100132354	-2.97544	0.00390713	0.0330229	Female
AGFG1	-2.97432	0.00391996	0.0330999	Female
KLHL18	-2.9729	0.00393627	0.0331809	Female
GFRA3	-2.97105	0.00395747	0.0333291	Female
SNX17	-2.97093	0.0039589	0.0333291	Female
HSD11B2	-2.97076	0.0039609	0.0333318	Female
MINPP1	-2.96906	0.00398062	0.0334125	Female
DCAF8	-2.96687	0.00400603	0.0335548	Female
KCNC2	-2.96619	0.00401397	0.033607	Female
RNF152	-2.96433	0.00403575	0.0337466	Female
MPZL1	-2.96403	0.00403937	0.0337483	Female
CREBL2	-2.96376	0.00404251	0.0337603	Female
CDC26	-2.96294	0.00405222	0.0338271	Female
SERPINE3	-2.96192	0.00406419	0.0338985	Female
ZFP91	-2.96177	0.00406602	0.0338995	Female
GKN1	-2.96113	0.00407358	0.0339339	Female
PHOSPHO2	-2.9597	0.00409058	0.0340326	Female
GPR149	-2.9593	0.00409528	0.0340431	Female
WNT10B	-2.95847	0.00410519	0.0340706	Female
EIF3D	-2.95811	0.00410952	0.0340899	Female
UBXN8	-2.95659	0.00412768	0.034157	Female
ZRANB3	-2.95606	0.0041341	0.034165	Female
AACS	-2.95538	0.00414231	0.0342141	Female
CELA2B	-2.95336	0.00416664	0.0343465	Female
CHRM4	-2.9524	0.00417828	0.0343465	Female
DDX42	-2.95246	0.00417758	0.0343465	Female
PEX10	-2.95227	0.00417989	0.0343465	Female
WAC	-2.95285	0.00417281	0.0343465	Female
HIST2H2BE	-2.94901	0.00421966	0.0345834	Female
IARS	-2.94849	0.00422597	0.0346207	Female
LDLR	-2.94695	0.00424494	0.0347331	Female
CGREF1	-2.94674	0.00424758	0.0347403	Female
PI4KAP1	-2.9441	0.00428016	0.0349635	Female
DCUN1D5	-2.9412	0.00431631	0.0352152	Female
CKS1B	-2.94047	0.00432546	0.0352753	Female
HNRNPR	-2.93878	0.00434669	0.0354047	Female
GPR89A	-2.93841	0.00435129	0.0354276	Female
MIB1	-2.93809	0.00435535	0.0354308	Female
DUOX1	-2.93581	0.00438416	0.0355636	Female
HSPA5	-2.93528	0.00439091	0.0355947	Female
USP48	-2.93523	0.00439159	0.0355947	Female
TRIM13	-2.93402	0.004407	0.0356466	Female
GYG2	-2.93314	0.00441826	0.0357194	Female
MAGI1	-2.93236	0.00442821	0.0357724	Female
ATP1A3	-2.93139	0.00444068	0.0358313	Female
C1orf115	-2.93088	0.00444723	0.0358549	Female
SLC19A1	-2.93019	0.00445608	0.0359116	Female
SPSB3	-2.92825	0.00448111	0.0360693	Female
S100PBP	-2.92641	0.00450497	0.0362088	Female
TMC1	-2.92635	0.00450575	0.0362088	Female
TGOLN2	-2.92512	0.00452178	0.0362984	Female
GGPS1	-2.92409	0.00453531	0.0363578	Female
PIGM	-2.92418	0.00453409	0.0363578	Female
RAB43	-2.92245	0.00455678	0.0364856	Female
SLMO1	-2.92186	0.00456456	0.0365331	Female
PANX2	-2.91997	0.00458953	0.0366772	Female
TDRD12	-2.91896	0.00460286	0.0367505	Female
ANKRD43	-2.91733	0.00462455	0.0368197	Female
LLGL1	-2.9167	0.00463301	0.0368719	Female
MC2R	-2.91631	0.00463825	0.0368844	Female
LOC440925	-2.91612	0.00464079	0.0368897	Female
RIPK4	-2.91513	0.00465396	0.0369322	Female
TSPAN8	-2.91502	0.00465546	0.0369322	Female
CHST10	-2.91376	0.00467246	0.0370029	Female
KIAA1671	-2.91352	0.00467558	0.0370029	Female
PECI	-2.91255	0.00468868	0.0370769	Female
C9orf119	-2.91184	0.00469827	0.0371247	Female
CCDC50	-2.90875	0.00474029	0.0374402	Female
COL4A3BP	-2.90742	0.00475849	0.037536	Female
ATF2	-2.90675	0.00476764	0.0375812	Female
C8orf40	-2.90522	0.00478871	0.0377173	Female
QSOX2	-2.90412	0.0048038	0.0378061	Female
UAP1	-2.90212	0.00483147	0.0379937	Female
NCKAP5L	-2.9002	0.00485817	0.0381557	Female
SCAPER	-2.89669	0.00490738	0.0384531	Female
SETX	-2.89593	0.00491807	0.0385064	Female
ASCC1	-2.89565	0.00492202	0.0385221	Female
SP7	-2.89208	0.00497276	0.0387966	Female
C22orf13	-2.89143	0.00498194	0.0388375	Female
C4orf40	-2.88931	0.00501239	0.0389982	Female
SET	-2.88887	0.00501862	0.0390313	Female
TLE1	-2.88843	0.00502495	0.0390498	Female
FRS2	-2.88659	0.00505161	0.0391955	Female
RAD51AP2	-2.88642	0.00505402	0.0391988	Female
MMS19	-2.88485	0.00507678	0.0393394	Female
TNRC6B	-2.88447	0.00508231	0.0393566	Female
C14orf109	-2.88116	0.00513058	0.0396838	Female
IPPK	-2.87991	0.00514894	0.0397793	Female
HPS6	-2.87975	0.00515133	0.0397822	Female
EPC2	-2.8789	0.00516388	0.0398325	Female
ADPRHL1	-2.87838	0.00517159	0.0398609	Female
FBXO31	-2.87686	0.00519414	0.0400036	Female
ZNF488	-2.87688	0.00519374	0.0400036	Female
CDH15	-2.87359	0.00524279	0.0402062	Female
DCC	-2.87452	0.00522889	0.0402062	Female
PLEKHA3	-2.87371	0.00524105	0.0402062	Female
SERPINB2	-2.87374	0.0052406	0.0402062	Female
FOXRED2	-2.87069	0.00528634	0.0404406	Female
LRRC57	-2.87061	0.00528765	0.0404406	Female
ALS2CR4	-2.87008	0.00529559	0.0404857	Female
PITPNA	-2.8686	0.00531792	0.0406094	Female
PI4KAP2	-2.86744	0.00533565	0.0407011	Female
HS3ST5	-2.86625	0.0053537	0.0407916	Female
ST3GAL4	-2.86595	0.00535826	0.0407916	Female
TMPPE	-2.86607	0.00535643	0.0407916	Female
VIL1	-2.86541	0.0053666	0.040808	Female
BLMH	-2.86466	0.00537805	0.0408794	Female
BECN1	-2.86315	0.00540125	0.0409771	Female
RRAGC	-2.86243	0.00541223	0.0410447	Female
E2F5	-2.8609	0.00543597	0.0412089	Female
SPHK2	-2.86074	0.00543838	0.0412114	Female
ZNF619	-2.86058	0.00544092	0.0412148	Female
AQP7P1	-2.86037	0.00544408	0.0412231	Female
MYCBPAP	-2.85743	0.00548991	0.0414907	Female
BCL7A	-2.85709	0.0054952	0.0415075	Female
SNAPC4	-2.85702	0.00549632	0.0415075	Female
ABHD13	-2.85591	0.00551365	0.041614	Female
C1orf124	-2.8543	0.00553897	0.0417499	Female
KHNYN	-2.85367	0.00554878	0.0417762	Female
PEX11B	-2.85353	0.00555106	0.0417775	Female
L3MBTL2	-2.85278	0.00556284	0.0418082	Female
SERHL	-2.85176	0.00557909	0.0418929	Female
RAET1G	-2.84981	0.00560996	0.0420312	Female
SC5DL	-2.84987	0.00560904	0.0420312	Female
APEH	-2.84946	0.00561558	0.0420553	Female
MGAT5B	-2.84875	0.00562689	0.042124	Female
DDI2	-2.84749	0.00564712	0.0422595	Female
FLJ35390	-2.84668	0.00566014	0.042325	Female
CSN2	-2.84644	0.00566388	0.0423369	Female
ACAT2	-2.84626	0.00566683	0.0423429	Female
BCDIN3D	-2.84487	0.00568924	0.0424944	Female
FARP1	-2.8447	0.00569193	0.0424985	Female
C10orf140	-2.84369	0.00570822	0.042588	Female
AFARP1	-2.84285	0.00572193	0.0426349	Female
GPRC5C	-2.84277	0.00572313	0.0426349	Female
PPP1R2P3	-2.84293	0.00572059	0.0426349	Female
LMF2	-2.84234	0.00573013	0.042655	Female
DHRS4	-2.83903	0.00578421	0.0428315	Female
GABARAPL3	-2.83894	0.00578559	0.0428315	Female
LRRC28	-2.83908	0.00578336	0.0428315	Female
NETO2	-2.83935	0.00577887	0.0428315	Female
RBM43	-2.83973	0.00577278	0.0428315	Female
ST6GALNAC6	-2.83914	0.00578231	0.0428315	Female
TROVE2	-2.8389	0.00578629	0.0428315	Female
ZFYVE9	-2.83947	0.00577699	0.0428315	Female
CELA1	-2.83787	0.0058032	0.0429086	Female
VEZF1	-2.83796	0.00580163	0.0429086	Female
VAMP2	-2.83743	0.00581046	0.0429462	Female
GATA5	-2.8372	0.00581424	0.0429581	Female
ANKRD29	-2.83666	0.00582309	0.0430075	Female
HIST1H2AC	-2.83622	0.00583043	0.0430456	Female
ANKMY1	-2.83556	0.00584125	0.0430934	Female
FLJ13197	-2.83477	0.00585441	0.0431744	Female
MESTIT1	-2.83442	0.00586016	0.0432007	Female
JPH3	-2.83367	0.00587261	0.0432281	Female
LOC441177	-2.83254	0.00589142	0.0433182	Female
CDC123	-2.83117	0.00591425	0.0434377	Female
DHRS11	-2.83095	0.00591799	0.043449	Female
DPP4	-2.82893	0.00595188	0.0436332	Female
POLR2B	-2.82878	0.00595434	0.043635	Female
ZC3H11A	-2.82827	0.00596287	0.0436652	Female
ZBTB6	-2.82494	0.00601934	0.0439325	Female
SPRYD4	-2.8248	0.00602158	0.0439327	Female
ZBTB40	-2.82276	0.00605638	0.0441215	Female
C11orf9	-2.82213	0.00606721	0.0441842	Female
HRASLS5	-2.82191	0.00607092	0.044195	Female
C9orf16	-2.8204	0.00609685	0.0443348	Female
ABCC5	-2.8196	0.00611062	0.0444023	Female
MUC6	-2.81945	0.0061132	0.0444048	Female
KRTAP5-6	-2.81912	0.00611887	0.0444297	Female
PNPLA2	-2.8187	0.00612623	0.0444668	Female
HSD3B1	-2.81787	0.00614046	0.0444891	Female
CAMSAP1	-2.81698	0.00615596	0.0445845	Female
SENP3	-2.81628	0.006168	0.0446555	Female
SLC25A23	-2.81601	0.00617269	0.044673	Female
GNG12	-2.8137	0.00621312	0.0449328	Female
MON1A	-2.81282	0.00622855	0.0450279	Female
CFLAR	-2.81236	0.00623647	0.045036	Female
MB	-2.80926	0.00629121	0.0453155	Female
CA1	-2.80895	0.00629671	0.0453221	Female
PGAM1	-2.80874	0.00630038	0.0453321	Female
UBN1	-2.80738	0.00632461	0.0454733	Female
TM6SF2	-2.80608	0.00634766	0.0455729	Female
RAPGEF1	-2.80346	0.00639464	0.0458315	Female
USH2A	-2.80342	0.00639526	0.0458315	Female
HOXB8	-2.80329	0.00639773	0.0458327	Female
CRK	-2.8002	0.00645338	0.0461152	Female
FABP1	-2.8002	0.00645347	0.0461152	Female
AATF	-2.80005	0.00645606	0.046117	Female
MIOX	-2.79941	0.00646769	0.0461521	Female
RNF123	-2.79888	0.00647729	0.0461521	Female
ST13	-2.79921	0.00647134	0.0461521	Female
CEP68	-2.7984	0.00648617	0.0461937	Female
NIF3L1	-2.79764	0.00649999	0.0462473	Female
FAM108B1	-2.79557	0.0065377	0.046428	Female
ACBD6	-2.79515	0.00654542	0.0464537	Female
GGT3P	-2.79399	0.0065667	0.0465236	Female
UBQLN4	-2.79327	0.00658014	0.0465999	Female
C8orf47	-2.79179	0.00660743	0.046743	Female
AP2B1	-2.79128	0.00661678	0.0467559	Female
CXorf57	-2.79116	0.00661915	0.0467559	Female
RPS26	-2.79105	0.00662106	0.0467559	Female
NKIRAS1	-2.79029	0.00663519	0.0468223	Female
SUZ12	-2.7883	0.00667228	0.0470003	Female
STXBP5	-2.78781	0.00668146	0.0470338	Female
DMRTB1	-2.7875	0.00668718	0.0470542	Female
SDK2	-2.78718	0.00669327	0.0470644	Female
ANKRD44	-2.78585	0.0067181	0.0471377	Female
GPAA1	-2.78589	0.00671744	0.0471377	Female
HIAT1	-2.78572	0.00672059	0.0471377	Female
KCNC4	-2.78594	0.00671647	0.0471377	Female
PIK3C3	-2.78619	0.00671172	0.0471377	Female
TRPV3	-2.78561	0.00672274	0.0471377	Female
SPDYE3	-2.78498	0.00673455	0.0471705	Female
PDZD4	-2.7848	0.00673794	0.0471775	Female
FAM118B	-2.78465	0.00674072	0.0471803	Female
IREB2	-2.78433	0.00674681	0.0472062	Female
PIP5K1A	-2.78399	0.00675325	0.0472346	Female
BMP4	-2.78135	0.00680334	0.0475011	Female
GRSF1	-2.78102	0.00680954	0.0475276	Female
KLK7	-2.78064	0.00681676	0.0475612	Female
NES	-2.78	0.00682894	0.0476294	Female
CT45A5	-2.77962	0.00683622	0.0476458	Female
ABCB10	-2.77841	0.00685939	0.0477409	Female
CUX2	-2.77688	0.00688881	0.0479107	Female
NHEJ1	-2.77676	0.00689105	0.0479107	Female
PRPF4	-2.77574	0.00691059	0.047996	Female
NAT8L	-2.77489	0.00692714	0.0480676	Female
KBTBD4	-2.77463	0.00693204	0.0480775	Female
DAB2	-2.77371	0.00695003	0.0481571	Female
ATRNL1	-2.77219	0.00697947	0.0482631	Female
HNRNPH1	-2.77212	0.00698074	0.0482631	Female
MC5R	-2.77169	0.00698921	0.0483048	Female
OR1L8	-2.77137	0.00699536	0.0483136	Female
PIPSL	-2.77101	0.00700237	0.0483283	Female
TTBK1	-2.77073	0.00700792	0.0483497	Female
KRT32	-2.77058	0.00701096	0.0483539	Female
CROCCL2	-2.77034	0.00701549	0.0483683	Female
ATP4A	-2.77018	0.00701876	0.048374	Female
DUOXA1	-2.76967	0.00702866	0.0484085	Female
PGAP2	-2.76686	0.00708391	0.0487008	Female
TNFAIP3	-2.76676	0.00708585	0.0487008	Female
BTN1A1	-2.76579	0.00710497	0.0487132	Female
FADS6	-2.76602	0.00710055	0.0487132	Female
MRPS22	-2.76567	0.00710734	0.0487132	Female
RBPMS2	-2.7664	0.00709306	0.0487132	Female
C1QL3	-2.76551	0.00711051	0.0487181	Female
OSTC	-2.76503	0.00712018	0.0487512	Female
ANKRD16	-2.76429	0.00713481	0.0487754	Female
DUSP16	-2.76446	0.0071314	0.0487754	Female
PSMD11	-2.7647	0.00712669	0.0487754	Female
AK7	-2.76405	0.00713963	0.0487826	Female
OTX1	-2.76371	0.00714621	0.0488107	Female
SMARCC1	-2.76222	0.00717596	0.0489632	Female
SLC13A5	-2.76199	0.00718062	0.0489781	Female
COL9A3	-2.76138	0.0071927	0.0490267	Female
SLC32A1	-2.76142	0.00719202	0.0490267	Female
MICALL1	-2.76093	0.00720185	0.0490722	Female
DPH2	-2.75946	0.00723131	0.049256	Female
SLC30A6	-2.75907	0.0072391	0.0492864	Female
HR	-2.7586	0.00724862	0.0492882	Female
SUV420H1	-2.75797	0.00726128	0.0493244	Female
DENND2D	-2.75653	0.00729036	0.049406	Female
TOR3A	-2.75651	0.00729076	0.049406	Female
FAM35A	-2.7561	0.00729921	0.0494198	Female
SMAGP	-2.75604	0.00730029	0.0494198	Female
UNC13B	-2.75627	0.00729577	0.0494198	Female
RAB11FIP2	-2.75436	0.00733447	0.0495327	Female
LPPR3	-2.7525	0.00737252	0.0497388	Female
GUCY2E	-2.75158	0.00739138	0.0498151	Female
CANT1	-2.75089	0.00740538	0.0498876	Female
PGBD3	-2.75081	0.00740718	0.0498876	Female
POLR2D	-2.75019	0.00741989	0.0499562	Female
DDX3Y	9.58515	8.98654e-15	1.15656e-10	Male
KDM5D	9.41573	1.90019e-14	1.15656e-10	Male
RPS4Y1	9.4947	1.34009e-14	1.15656e-10	Male
ZFY	9.36903	2.33637e-14	1.15656e-10	Male
PRKY	9.08304	8.29612e-14	2.73786e-10	Male
USP9Y	9.11509	7.19702e-14	2.73786e-10	Male
EIF1AY	9.02913	1.0538e-13	2.98089e-10	Male
UTY	8.87652	2.07458e-13	5.13485e-10	Male
CYorf15B	8.55557	8.63205e-13	1.89915e-09	Male
TTTY15	8.3421	2.22835e-12	4.41235e-09	Male
PPARD	8.2334	3.61089e-12	6.49994e-09	Male
CYorf15A	8.19033	4.37172e-12	7.2137e-09	Male
TOP1P1	7.69913	3.85351e-11	5.45023e-08	Male
NLGN4Y	7.38873	1.51453e-10	1.76407e-07	Male
TMSB4Y	6.87522	1.43087e-09	1.08972e-06	Male
ARPC3	6.70694	2.96703e-09	2.17593e-06	Male
PDZD11	6.63343	4.07485e-09	2.78228e-06	Male
RRBP1	6.36705	1.27757e-08	7.90537e-06	Male
HSPB1	6.35463	1.3471e-08	8.08299e-06	Male
ENTPD6	6.34572	1.39923e-08	8.14888e-06	Male
653553	6.25033	2.09969e-08	1.18788e-05	Male
NCRNA00185	6.22623	2.32575e-08	1.2119e-05	Male
NDUFA1	6.23239	2.26578e-08	1.2119e-05	Male
NAA20	6.18025	2.82589e-08	1.39889e-05	Male
TSR2	6.02687	5.39499e-08	2.42787e-05	Male
BLVRB	6.00328	5.95666e-08	2.56408e-05	Male
TTTY10	5.99506	6.16544e-08	2.59749e-05	Male
COX7B	5.98827	6.34353e-08	2.61684e-05	Male
NXT1	5.94219	7.69333e-08	3.04671e-05	Male
CAPNS1	5.92239	8.3571e-08	3.24468e-05	Male
STX4	5.8596	1.08579e-07	3.83925e-05	Male
VPS16	5.86327	1.06931e-07	3.83925e-05	Male
MAP3K6	5.82796	1.23845e-07	4.16864e-05	Male
ZNF23	5.82725	1.24211e-07	4.16864e-05	Male
CCDC23	5.73737	1.80254e-07	5.46225e-05	Male
CDS2	5.73941	1.78745e-07	5.46225e-05	Male
SNRPB2	5.73038	1.85541e-07	5.46225e-05	Male
IQUB	5.66294	2.44993e-07	6.55554e-05	Male
UBE2I	5.65632	2.51758e-07	6.55928e-05	Male
SH3BGRL	5.62332	2.88298e-07	7.3187e-05	Male
TOP1P2	5.60501	3.10775e-07	7.41405e-05	Male
ZNF84	5.60761	3.07486e-07	7.41405e-05	Male
SNRPB	5.57646	3.49317e-07	8.04282e-05	Male
HIGD2A	5.5498	3.89514e-07	8.66603e-05	Male
PDCD5	5.54255	4.01208e-07	8.71375e-05	Male
PLD4	5.50946	4.59157e-07	9.27731e-05	Male
MAGED2	5.47482	5.28617e-07	0.000104672	Male
NUBP1	5.43343	6.25252e-07	0.000121922	Male
PCBP3	5.40385	7.04724e-07	0.000134175	Male
SYS1	5.39027	7.44453e-07	0.000139065	Male
MS4A14	5.37243	8.00038e-07	0.000144014	Male
BCORL2	5.35919	8.43866e-07	0.000149191	Male
COX6B1	5.32423	9.71335e-07	0.000161625	Male
ZCCHC3	5.32754	9.58493e-07	0.000161625	Male
MRPL22	5.29774	1.08029e-06	0.000175334	Male
SERTAD3	5.29515	1.09153e-06	0.000175719	Male
HS6ST3	5.26556	1.22885e-06	0.000194204	Male
ZNF480	5.26416	1.23578e-06	0.000194204	Male
GAPT	5.24817	1.31734e-06	0.000199307	Male
SUSD4	5.25262	1.29411e-06	0.000199307	Male
XRCC1	5.23835	1.36997e-06	0.000204431	Male
HARS	5.22612	1.43846e-06	0.000205449	Male
RASGEF1C	5.23129	1.40911e-06	0.000205449	Male
ZNF768	5.22367	1.4526e-06	0.000205449	Male
C13orf16	5.20991	1.53449e-06	0.000211003	Male
PNLIPRP3	5.20671	1.55413e-06	0.000211301	Male
CSGALNACT1	5.17619	1.75469e-06	0.00022867	Male
ZNF764	5.17609	1.75536e-06	0.00022867	Male
C20orf29	5.16282	1.8503e-06	0.000237908	Male
TBL3	5.14647	1.97416e-06	0.000244315	Male
LOC644936	5.13545	2.06224e-06	0.000250783	Male
RBM19	5.12968	2.10983e-06	0.000253193	Male
LCORL	5.12809	2.12315e-06	0.000253256	Male
COX6A1	5.11646	2.22308e-06	0.000262019	Male
ANKS3	5.10518	2.32441e-06	0.000271413	Male
C5orf32	5.09154	2.45289e-06	0.000282382	Male
B9D2	5.08795	2.48783e-06	0.000283262	Male
PDRG1	5.08782	2.48915e-06	0.000283262	Male
CSNK2A2	5.0785	2.58224e-06	0.000291291	Male
ZNF141	5.07783	2.58912e-06	0.000291291	Male
SNTB2	5.07058	2.66409e-06	0.000294702	Male
CSF2RA	5.06008	2.77642e-06	0.000298642	Male
FANCL	5.06071	2.76958e-06	0.000298642	Male
PFDN1	5.05609	2.82036e-06	0.000298642	Male
FAM96B	5.0542	2.8414e-06	0.000299269	Male
LAS1L	5.03842	3.02311e-06	0.000313092	Male
ACTB	5.02521	3.18386e-06	0.000326651	Male
APAF1	5.01501	3.31367e-06	0.000333355	Male
AMY1A	5.00847	3.39964e-06	0.000334544	Male
C5orf43	5.00748	3.41285e-06	0.000334544	Male
COMMD7	4.98828	3.67914e-06	0.000355369	Male
IQCK	4.98975	3.65793e-06	0.000355369	Male
CBLN4	4.97381	3.89302e-06	0.000374203	Male
C20orf30	4.97042	3.94479e-06	0.000377236	Male
UROD	4.96769	3.98709e-06	0.000377743	Male
SLC35A4	4.96389	4.04666e-06	0.000381561	Male
PSMB10	4.93644	4.5032e-06	0.000422596	Male
TCOF1	4.93372	4.55118e-06	0.000425085	Male
SFRS8	4.92158	4.77103e-06	0.000441454	Male
C12orf65	4.91452	4.90366e-06	0.000449525	Male
VWA5B2	4.90755	5.03801e-06	0.000455514	Male
ZFP14	4.908	5.02919e-06	0.000455514	Male
COPG2	4.90203	5.14707e-06	0.00046326	Male
ZNF605	4.89175	5.35639e-06	0.000475614	Male
THOC6	4.88888	5.4161e-06	0.000478769	Male
SSBP3	4.85971	6.06299e-06	0.00052425	Male
ABAT	4.84936	6.31008e-06	0.000543243	Male
CHD7	4.83549	6.65675e-06	0.00056077	Male
CPEB2	4.83445	6.68359e-06	0.00056077	Male
FCGR1C	4.82993	6.80092e-06	0.00056357	Male
TDRD9	4.83065	6.78205e-06	0.00056357	Male
IFT80	4.82271	6.99261e-06	0.000574525	Male
ATXN2L	4.81575	7.18243e-06	0.000587683	Male
SNRPF	4.81125	7.3077e-06	0.000593031	Male
DNAH7	4.80662	7.43884e-06	0.00060121	Male
TTTY14	4.80269	7.55202e-06	0.000607876	Male
GPRC5A	4.79815	7.68485e-06	0.000611115	Male
PTPRA	4.79989	7.63372e-06	0.000611115	Male
ZNF341	4.78838	7.97846e-06	0.000629409	Male
CFDP1	4.76972	8.56992e-06	0.000668082	Male
ZNF133	4.76747	8.64408e-06	0.000668599	Male
ZNF423	4.7643	8.74962e-06	0.000674129	Male
SAT1	4.75531	9.05561e-06	0.00068439	Male
FGD1	4.74759	9.32673e-06	0.0007022	Male
TTLL9	4.74231	9.51696e-06	0.000713808	Male
DNTTIP1	4.72105	1.03208e-05	0.000765401	Male
SIGLEC10	4.7178	1.04492e-05	0.000770976	Male
CHFR	4.70782	1.08538e-05	0.00078965	Male
COX4I1	4.70702	1.0887e-05	0.00078965	Male
SSBP2	4.70439	1.09963e-05	0.000792717	Male
IFFO1	4.69308	1.14794e-05	0.000814711	Male
H2AFJ	4.68128	1.20057e-05	0.000840015	Male
AMY2B	4.67734	1.21863e-05	0.000849649	Male
GAL3ST4	4.67388	1.23475e-05	0.000854867	Male
MED29	4.67462	1.23129e-05	0.000854867	Male
TREM2	4.67185	1.24426e-05	0.000858453	Male
TWIST1	4.67084	1.24905e-05	0.000858764	Male
C5orf62	4.66117	1.29566e-05	0.000883133	Male
DNM1L	4.66072	1.29787e-05	0.000883133	Male
TIMM17B	4.64485	1.3782e-05	0.000925077	Male
ZCCHC10	4.64573	1.37363e-05	0.000925077	Male
FAM104B	4.64327	1.38646e-05	0.000927477	Male
AKR1D1	4.62985	1.45851e-05	0.000953529	Male
APEX2	4.6323	1.44508e-05	0.000953529	Male
BCL3	4.62713	1.47356e-05	0.000953529	Male
PMFBP1	4.62849	1.46605e-05	0.000953529	Male
ZNF10	4.62723	1.47303e-05	0.000953529	Male
ZNF879	4.62727	1.47281e-05	0.000953529	Male
AGXT2L2	4.62096	1.50825e-05	0.000972799	Male
APBB2	4.61962	1.5159e-05	0.000973533	Male
ZNF676	4.61577	1.53808e-05	0.000982437	Male
KIAA1009	4.6149	1.54314e-05	0.0009825	Male
TCEB2	4.60452	1.60462e-05	0.00100548	Male
EBF1	4.60163	1.62216e-05	0.00101326	Male
CEP135	4.59991	1.6327e-05	0.00101345	Male
ZBTB46	4.60016	1.63116e-05	0.00101345	Male
MYST1	4.59636	1.65469e-05	0.00102361	Male
C17orf60	4.59307	1.67527e-05	0.00102716	Male
RGS1	4.58713	1.71308e-05	0.00103869	Male
SFRS4	4.58678	1.71532e-05	0.00103869	Male
LAT2	4.58306	1.73945e-05	0.00105009	Male
PCDHGC3	4.5776	1.77548e-05	0.00106212	Male
MRPS26	4.55961	1.89943e-05	0.00111536	Male
TOP1	4.55991	1.89728e-05	0.00111536	Male
NXF5	4.5514	1.95867e-05	0.00114406	Male
UBE2V1	4.54678	1.99288e-05	0.00115721	Male
NCOA6	4.53936	2.04894e-05	0.00118283	Male
C19orf61	4.53409	2.08969e-05	0.00119245	Male
C6orf136	4.5347	2.08489e-05	0.00119245	Male
MAPK8IP3	4.53287	2.09924e-05	0.00119438	Male
TLR5	4.53211	2.10514e-05	0.00119438	Male
DOCK4	4.53065	2.11668e-05	0.0011954	Male
TMSL3	4.53036	2.11901e-05	0.0011954	Male
C11orf93	4.52075	2.19636e-05	0.001219	Male
ZDHHC24	4.51763	2.22205e-05	0.00122219	Male
NTN1	4.51613	2.23449e-05	0.00122563	Male
ARHGDIB	4.50827	2.3009e-05	0.00123805	Male
SNX16	4.50311	2.3456e-05	0.0012519	Male
GIYD2	4.4988	2.38353e-05	0.00126856	Male
PSENEN	4.49741	2.39585e-05	0.00126856	Male
MGAT4A	4.49521	2.41552e-05	0.00127546	Male
NDUFA2	4.48657	2.49442e-05	0.00130667	Male
PKIG	4.48288	2.52883e-05	0.00130864	Male
RALY	4.48262	2.53123e-05	0.00130864	Male
ZNF140	4.47932	2.56243e-05	0.00132132	Male
ITGB3BP	4.47753	2.57955e-05	0.00132669	Male
GNAO1	4.4724	2.62911e-05	0.00134868	Male
CLEC2D	4.46725	2.67982e-05	0.00135365	Male
GSTA2	4.46824	2.67003e-05	0.00135365	Male
OSGEP	4.46761	2.67629e-05	0.00135365	Male
PLP2	4.46938	2.65874e-05	0.00135365	Male
CDR2	4.44773	2.88077e-05	0.0014441	Male
MAPK9	4.4384	2.98181e-05	0.00147977	Male
TXNDC3	4.42806	3.09795e-05	0.00153356	Male
SHFM1	4.42356	3.14982e-05	0.00155148	Male
MSTN	4.41786	3.21665e-05	0.00156879	Male
C11orf92	4.41202	3.28665e-05	0.00158854	Male
KLHDC4	4.41228	3.28348e-05	0.00158854	Male
CPNE4	4.41087	3.30063e-05	0.00159017	Male
PPIH	4.40991	3.31235e-05	0.00159194	Male
PIGU	4.4088	3.3259e-05	0.00159458	Male
PDHA1	4.40138	3.41802e-05	0.00162015	Male
TRIP10	4.40272	3.40111e-05	0.00162015	Male
ZNF267	4.40121	3.42014e-05	0.00162015	Male
TRIM9	4.39575	3.48946e-05	0.00164736	Male
SIGLEC9	4.38547	3.6239e-05	0.00169638	Male
CCDC85A	4.37478	3.76881e-05	0.00174768	Male
AKR1C1	4.37279	3.79641e-05	0.00175373	Male
FAM127B	4.37257	3.79955e-05	0.00175373	Male
CTSA	4.3695	3.84248e-05	0.00175594	Male
RIN3	4.36906	3.84868e-05	0.00175594	Male
RND3	4.37026	3.83187e-05	0.00175594	Male
ZNF688	4.36759	3.86955e-05	0.00176001	Male
FUNDC2	4.36166	3.95457e-05	0.00178504	Male
LRCH4	4.35969	3.98313e-05	0.00178691	Male
NARFL	4.35531	4.04745e-05	0.00180504	Male
ZCCHC8	4.35012	4.12507e-05	0.00182366	Male
MLST8	4.34837	4.15151e-05	0.00183083	Male
FCGR1B	4.3463	4.1831e-05	0.00184066	Male
TIMP1	4.34438	4.21264e-05	0.00184545	Male
FLT3LG	4.33981	4.28358e-05	0.00187239	Male
FAM101A	4.33731	4.32287e-05	0.0018854	Male
MT1E	4.33463	4.36526e-05	0.00189554	Male
CCDC92	4.32671	4.49337e-05	0.0019342	Male
DYNLL1	4.32598	4.50532e-05	0.00193514	Male
RGS18	4.32454	4.52906e-05	0.00194113	Male
PSG4	4.32003	4.60402e-05	0.00195632	Male
RERG	4.32048	4.59651e-05	0.00195632	Male
ZCRB1	4.31315	4.72087e-05	0.00198889	Male
CENPB	4.31133	4.75233e-05	0.00198945	Male
GNAS	4.3103	4.77019e-05	0.00199249	Male
LY86	4.30917	4.78979e-05	0.00199249	Male
ADAM28	4.30745	4.81993e-05	0.00199664	Male
SOD2	4.30774	4.81474e-05	0.00199664	Male
CDK14	4.30419	4.87727e-05	0.00200363	Male
GNPTAB	4.30303	4.89798e-05	0.00200382	Male
RGS10	4.30343	4.89085e-05	0.00200382	Male
LOC401397	4.29881	4.97376e-05	0.00202331	Male
UBOX5	4.29867	4.97628e-05	0.00202331	Male
LOC388789	4.295	5.04304e-05	0.00203375	Male
MKKS	4.29536	5.03648e-05	0.00203375	Male
ZCCHC9	4.2963	5.01927e-05	0.00203375	Male
GPCPD1	4.28978	5.13948e-05	0.0020559	Male
IL17RE	4.28044	5.3167e-05	0.0020952	Male
MAP1A	4.28129	5.30029e-05	0.0020952	Male
NDUFB10	4.28221	5.28272e-05	0.0020952	Male
C12orf35	4.27564	5.40999e-05	0.00212125	Male
TGFBI	4.27596	5.40381e-05	0.00212125	Male
CASC1	4.27036	5.51448e-05	0.00213249	Male
FAM43B	4.27287	5.46463e-05	0.00213249	Male
PQBP1	4.27072	5.50725e-05	0.00213249	Male
ZNF100	4.27143	5.49323e-05	0.00213249	Male
ELOVL7	4.26749	5.57213e-05	0.00213411	Male
SEMG1	4.26617	5.59885e-05	0.00214021	Male
CTU2	4.26432	5.63635e-05	0.00214626	Male
FAM124B	4.26192	5.68558e-05	0.00215325	Male
AKR1C3	4.25976	5.73017e-05	0.00216532	Male
KIAA0895L	4.25758	5.77556e-05	0.00217487	Male
LOC92249	4.25749	5.77738e-05	0.00217487	Male
ZNF529	4.25621	5.80424e-05	0.00218083	Male
PPDPF	4.25056	5.92393e-05	0.0022132	Male
COMMD10	4.24726	5.99497e-05	0.00222714	Male
PCDH11Y	4.24616	6.01894e-05	0.00223057	Male
ROR2	4.24528	6.03801e-05	0.00223057	Male
ACADL	4.23719	6.21688e-05	0.00227881	Male
ZGPAT	4.23764	6.20676e-05	0.00227881	Male
NKRF	4.23419	6.28447e-05	0.00229592	Male
C20orf135	4.23283	6.31544e-05	0.00230298	Male
NDUFAF2	4.23049	6.36896e-05	0.00231823	Male
CX3CR1	4.22697	6.45016e-05	0.00233831	Male
CLEC4A	4.22437	6.5109e-05	0.00234589	Male
TCEAL4	4.22302	6.54253e-05	0.00235116	Male
BTBD12	4.2198	6.61883e-05	0.00236997	Male
LPAR5	4.21702	6.68535e-05	0.00238426	Male
ZDHHC17	4.21576	6.71584e-05	0.00238744	Male
FOXF1	4.21371	6.76545e-05	0.00239371	Male
UXT	4.21341	6.77274e-05	0.00239371	Male
C16orf53	4.20249	7.0438e-05	0.00247989	Male
RPS14	4.2022	7.05104e-05	0.00247989	Male
CCDC59	4.20158	7.06678e-05	0.00248102	Male
MAF	4.19696	7.18514e-05	0.00251582	Male
RNF39	4.19672	7.19131e-05	0.00251582	Male
VAC14	4.19509	7.23341e-05	0.00252608	Male
RGS2	4.19003	7.36593e-05	0.00255434	Male
ZMYND15	4.19091	7.34275e-05	0.00255434	Male
UQCRB	4.18872	7.40041e-05	0.00256181	Male
C16orf70	4.18074	7.61509e-05	0.00260876	Male
KIAA1274	4.17848	7.67715e-05	0.00261428	Male
THOC3	4.17098	7.88577e-05	0.00266007	Male
UBE2N	4.16981	7.91885e-05	0.00266669	Male
HSPBP1	4.16881	7.9473e-05	0.0026672	Male
ITPA	4.16909	7.93944e-05	0.0026672	Male
EVI2A	4.16713	7.99503e-05	0.00267415	Male
TP53RK	4.16739	7.98774e-05	0.00267415	Male
ZNF668	4.16573	8.03536e-05	0.00267859	Male
C11orf80	4.1633	8.10538e-05	0.00268987	Male
RICTOR	4.16264	8.12456e-05	0.00269021	Male
GSTA1	4.16159	8.15488e-05	0.00269326	Male
ARAP3	4.16039	8.18996e-05	0.00269833	Male
MED28	4.15895	8.23228e-05	0.00270327	Male
FCGR1A	4.15732	8.28022e-05	0.00271155	Male
PRKCB	4.14879	8.53632e-05	0.00275289	Male
ZNF165	4.14935	8.51919e-05	0.00275289	Male
ZNF492	4.14997	8.50047e-05	0.00275289	Male
HIRIP3	4.14085	8.78104e-05	0.00281348	Male
C5orf28	4.13652	8.91757e-05	0.00283638	Male
GRPEL2	4.13442	8.98463e-05	0.00285104	Male
BFSP1	4.13127	9.0859e-05	0.00286938	Male
ARHGAP24	4.12684	9.23022e-05	0.0028904	Male
FAM18A	4.12682	9.23078e-05	0.0028904	Male
PPP1R11	4.1258	9.26426e-05	0.0028904	Male
TAF4	4.12548	9.27486e-05	0.0028904	Male
ZNF841	4.12737	9.21267e-05	0.0028904	Male
CHMP1A	4.12425	9.31535e-05	0.00289112	Male
TMEM90A	4.12278	9.36415e-05	0.00290171	Male
C8orf75	4.12232	9.37972e-05	0.002902	Male
F3	4.11794	9.5268e-05	0.00291892	Male
PI3	4.11762	9.53759e-05	0.00291892	Male
ZNF385D	4.11808	9.52207e-05	0.00291892	Male
UBE2CBP	4.1162	9.58578e-05	0.00292914	Male
DCTN4	4.1142	9.65392e-05	0.00294541	Male
CHST5	4.11213	9.72523e-05	0.00295352	Male
FAT3	4.11253	9.71153e-05	0.00295352	Male
ZNF26	4.10906	9.83174e-05	0.00296766	Male
GBP2	4.10234	0.000100688	0.00301622	Male
ZNF721	4.10293	0.00010048	0.00301622	Male
POU2F2	4.09661	0.000102754	0.00306419	Male
COG7	4.09448	0.00010353	0.00308225	Male
KIAA1217	4.0941	0.00010367	0.00308225	Male
TMEM215	4.08788	0.000105977	0.00312149	Male
MSRA	4.08538	0.000106919	0.00314111	Male
NFKBID	4.08018	0.000108903	0.00318905	Male
RGAG4	4.07984	0.000109034	0.00318905	Male
HRH2	4.07565	0.000110659	0.00320815	Male
LOC283070	4.07565	0.000110659	0.00320815	Male
TLR7	4.07568	0.000110648	0.00320815	Male
ARFGAP1	4.06591	0.000114529	0.00329325	Male
C21orf2	4.06635	0.000114353	0.00329325	Male
NSMCE1	4.06627	0.000114384	0.00329325	Male
MPZL2	4.06512	0.000114849	0.00329583	Male
NFKBIB	4.06414	0.000115247	0.00330246	Male
NDUFS5	4.06188	0.000116169	0.00332309	Male
SYN2	4.06058	0.000116703	0.00332494	Male
UBE2A	4.0562	0.000118517	0.00334296	Male
HAVCR2	4.04627	0.00012273	0.00343244	Male
PAPSS1	4.04579	0.00012294	0.00343348	Male
SPI1	4.04413	0.00012366	0.00343387	Male
BRD8	4.0317	0.000129179	0.00355612	Male
PLCXD3	4.03193	0.000129073	0.00355612	Male
SLC16A14	4.03108	0.000129458	0.00355612	Male
TCFL5	4.02337	0.000133009	0.00364779	Male
ELMO1	4.02149	0.000133887	0.00366033	Male
ZSWIM1	4.02133	0.000133966	0.00366033	Male
ABCF3	4.01883	0.000135141	0.00368079	Male
MAK	4.01893	0.000135094	0.00368079	Male
CHMP4B	4.0174	0.000135821	0.00368916	Male
THUMPD1	4.01744	0.000135803	0.00368916	Male
ZNF571	4.01455	0.000137183	0.00372104	Male
CD74	4.00721	0.000140752	0.00378672	Male
ENPP1	4.00755	0.000140587	0.00378672	Male
PXN	4.00626	0.000141223	0.00379424	Male
ZNF765	4.0017	0.000143493	0.00383961	Male
CDKAL1	3.99947	0.000144616	0.00385923	Male
DCUN1D3	3.9981	0.000145308	0.00386727	Male
MSH4	3.99846	0.000145129	0.00386727	Male
ZCCHC4	3.9918	0.000148543	0.00393221	Male
NPC2	3.98654	0.000151291	0.00398896	Male
C20orf96	3.98598	0.000151589	0.0039915	Male
RBMX2	3.98555	0.000151818	0.00399223	Male
CHST6	3.98362	0.000152844	0.00400325	Male
LILRB1	3.98396	0.000152662	0.00400325	Male
BCAS4	3.98251	0.000153433	0.00401337	Male
ZNF404	3.97932	0.00015515	0.00404761	Male
ATP5I	3.97728	0.000156258	0.00406578	Male
ATP6V1F	3.97757	0.000156097	0.00406578	Male
ARF5	3.97573	0.0001571	0.00407699	Male
MAGIX	3.97369	0.000158223	0.00410074	Male
STK32A	3.97006	0.000160233	0.0041366	Male
C16orf57	3.96805	0.000161361	0.0041549	Male
GPR126	3.96686	0.000162027	0.00416644	Male
LRRIQ1	3.9665	0.000162231	0.00416644	Male
FAM113A	3.96241	0.000164553	0.00420971	Male
FAM127A	3.95988	0.000166007	0.00424143	Male
EIF3CL	3.95664	0.000167891	0.00426711	Male
G0S2	3.95639	0.000168031	0.00426711	Male
CTBP1	3.95423	0.000169302	0.00428142	Male
C10orf105	3.95225	0.000170469	0.00428485	Male
CTNNBL1	3.9529	0.000170084	0.00428485	Male
LOC442454	3.95352	0.00016972	0.00428485	Male
OSBPL3	3.95143	0.000170953	0.00428485	Male
PPP2CA	3.9517	0.000170793	0.00428485	Male
ABCA11P	3.95001	0.000171795	0.00430052	Male
ARHGAP17	3.94942	0.00017215	0.00430397	Male
ZNF75A	3.94538	0.000174578	0.00434821	Male
DPYD	3.94299	0.000176029	0.00437738	Male
HMGN5	3.94218	0.000176526	0.0043802	Male
UQCRQ	3.9395	0.000178174	0.00441554	Male
SYT6	3.93852	0.00017878	0.00442502	Male
MORF4L2	3.93703	0.000179703	0.00444231	Male
TNR	3.93581	0.000180468	0.00445012	Male
CDH23	3.93473	0.000181141	0.00445738	Male
TRAPPC5	3.93164	0.000183089	0.00449238	Male
FCER1A	3.92674	0.00018622	0.00454643	Male
SYCP2L	3.927	0.000186052	0.00454643	Male
VAV3	3.9264	0.00018644	0.00454643	Male
S100A11	3.92591	0.000186756	0.00454852	Male
UQCC	3.92248	0.000188983	0.00458585	Male
HAUS5	3.91987	0.000190693	0.00461792	Male
EMP3	3.91918	0.000191154	0.00462154	Male
B4GALT7	3.91803	0.000191914	0.00462685	Male
GPR34	3.91779	0.000192075	0.00462685	Male
C1orf133	3.91721	0.000192455	0.00463037	Male
FLI1	3.91566	0.00019349	0.00464399	Male
ZNF575	3.91288	0.000195352	0.00467735	Male
TCTEX1D1	3.90368	0.000201653	0.00480498	Male
SFRS12	3.90183	0.000202942	0.00482987	Male
JAK3	3.90069	0.000203742	0.0048431	Male
HCFC1R1	3.89779	0.000205788	0.00486834	Male
ZFYVE16	3.89803	0.000205621	0.00486834	Male
CYTL1	3.89456	0.000208088	0.00489935	Male
ZNF683	3.89469	0.000207999	0.00489935	Male
GRM6	3.89227	0.000209738	0.00493232	Male
PREX1	3.89084	0.00021077	0.00494486	Male
CCNJL	3.88809	0.000212777	0.00496839	Male
LOC648740	3.88689	0.000213652	0.00498146	Male
CARD16	3.88443	0.000215468	0.00500291	Male
PSG7	3.88447	0.000215436	0.00500291	Male
ATOX1	3.87121	0.000225474	0.00517336	Male
GLTP	3.86928	0.000226971	0.00519145	Male
OGFR	3.86949	0.000226812	0.00519145	Male
LOC283856	3.86713	0.000228653	0.00520279	Male
ZNF788	3.86776	0.000228162	0.00520279	Male
RUFY1	3.86599	0.000229551	0.00521256	Male
RSRC2	3.86526	0.000230123	0.00521737	Male
YARS2	3.86505	0.000230291	0.00521737	Male
ABHD12	3.8633	0.000231677	0.00523083	Male
PIGL	3.86363	0.000231413	0.00523083	Male
EPS8	3.8626	0.000232231	0.00523736	Male
DNAI1	3.86123	0.00023332	0.00524996	Male
ZFP90	3.8615	0.000233111	0.00524996	Male
PSG5	3.86073	0.000233721	0.00525301	Male
LOC100132247	3.85899	0.000235116	0.00527241	Male
RPP21	3.85724	0.000236535	0.00529224	Male
MALAT1	3.85605	0.000237502	0.00530188	Male
GM2A	3.85147	0.000241247	0.00536734	Male
FBXW12	3.8485	0.000243717	0.00540687	Male
KIF24	3.84802	0.000244116	0.00540687	Male
ZNF577	3.8468	0.000245137	0.00541004	Male
ZNF643	3.84654	0.000245352	0.00541004	Male
CMAH	3.84432	0.000247223	0.00542712	Male
FCGR2A	3.84451	0.000247056	0.00542712	Male
NPRL3	3.84304	0.000248302	0.00544478	Male
CCDC147	3.83749	0.000253051	0.00553614	Male
SELPLG	3.83698	0.000253496	0.00553614	Male
COX7C	3.83493	0.000255275	0.00555462	Male
ITGA10	3.83301	0.00025695	0.00557881	Male
CSDC2	3.83084	0.000258865	0.00560194	Male
CHRAC1	3.83026	0.000259376	0.00560688	Male
CD59	3.82555	0.000263574	0.00566682	Male
CDK5RAP1	3.82554	0.00026358	0.00566682	Male
SLC16A10	3.82467	0.000264362	0.00567747	Male
NOC4L	3.81807	0.00027037	0.00578768	Male
C1orf230	3.81639	0.000271919	0.00581455	Male
SIRPA	3.81579	0.000272477	0.0058202	Male
RNASET2	3.81457	0.000273614	0.00583818	Male
TERF2IP	3.81381	0.000274322	0.00584698	Male
CLECL1	3.81082	0.000277125	0.00589556	Male
TNFAIP8L2	3.81074	0.000277197	0.00589556	Male
NME4	3.80875	0.000279083	0.00591661	Male
ZNF354A	3.8072	0.000280556	0.00592881	Male
ABI3BP	3.80663	0.000281099	0.00593395	Male
CDH6	3.80545	0.000282227	0.00595142	Male
ZNF224	3.80452	0.000283119	0.00595249	Male
HCP5	3.79574	0.000291686	0.00611183	Male
BLOC1S1	3.79049	0.000296924	0.00617663	Male
HDAC8	3.7879	0.000299539	0.00621064	Male
RLIM	3.77935	0.000308338	0.00635979	Male
IL3RA	3.77716	0.000310625	0.0064003	Male
NDUFA3	3.77618	0.000311661	0.00641375	Male
ZNF524	3.77481	0.000313107	0.00643137	Male
LAIR1	3.76856	0.000319788	0.00654182	Male
TIMM16	3.76691	0.000321577	0.00655773	Male
RP2	3.76517	0.000323473	0.0065626	Male
SGTA	3.76519	0.000323445	0.0065626	Male
RBM39	3.76208	0.000326861	0.0066195	Male
ZNF137	3.762	0.000326947	0.0066195	Male
B9D1	3.75932	0.000329921	0.00664939	Male
FBRS	3.75993	0.000329239	0.00664939	Male
GADL1	3.75916	0.000330102	0.00664939	Male
NDUFS7	3.75921	0.000330047	0.00664939	Male
LST1	3.7568	0.000332739	0.0066889	Male
HECTD3	3.75194	0.000338232	0.00678555	Male
MSN	3.75151	0.000338724	0.00678853	Male
EFCAB10	3.74905	0.000341539	0.00681919	Male
ZNF542	3.74904	0.000341548	0.00681919	Male
RALGDS	3.74828	0.000342429	0.00682823	Male
GPR87	3.7458	0.000345295	0.00687155	Male
JMJD5	3.74512	0.000346087	0.00687349	Male
CRIP3	3.74311	0.000348438	0.00689942	Male
TMEM188	3.74231	0.000349371	0.00690538	Male
C12orf50	3.74039	0.000351635	0.00691432	Male
MIDN	3.74063	0.000351351	0.00691432	Male
RNPS1	3.74143	0.000350411	0.00691432	Male
ALG13	3.73836	0.000354048	0.00694798	Male
MTHFSD	3.73684	0.000355867	0.00697675	Male
HLA-A	3.73585	0.000357052	0.00699306	Male
PLCE1	3.73514	0.000357899	0.00700273	Male
BOLA2	3.73375	0.000359571	0.0070285	Male
IKZF1	3.73146	0.000362348	0.00706186	Male
LPAR6	3.72896	0.000365412	0.0071006	Male
PHF6	3.72413	0.000371383	0.0072025	Male
C20orf196	3.72208	0.000373943	0.00724505	Male
TYROBP	3.72039	0.000376062	0.00727188	Male
ZFP2	3.71958	0.000377089	0.00728462	Male
ZDHHC14	3.71755	0.000379666	0.007313	Male
DUSP23	3.71526	0.000382585	0.00735668	Male
CPPED1	3.71188	0.000386938	0.00741499	Male
LCP2	3.71163	0.000387258	0.00741499	Male
ZNHIT1	3.7085	0.000391337	0.00745799	Male
TIGD7	3.70286	0.00039879	0.00757816	Male
MECOM	3.7004	0.000402083	0.00762609	Male
BCL7C	3.6998	0.000402898	0.00763424	Male
FYB	3.69879	0.000404256	0.00765265	Male
ALDOA	3.695	0.000409401	0.00771401	Male
DBNDD2	3.69473	0.000409777	0.00771401	Male
SIRT6	3.69553	0.000408687	0.00771401	Male
SRY	3.69469	0.000409835	0.00771401	Male
NOX5	3.69215	0.000413314	0.00775737	Male
FIZ1	3.69042	0.000415712	0.007795	Male
GPR32	3.68707	0.000420389	0.00786779	Male
ZNF593	3.68207	0.000427449	0.0079548	Male
PNRC2	3.68103	0.000428932	0.00797492	Male
GUCY1B3	3.67948	0.00043115	0.00800863	Male
MTCP1NB	3.6744	0.000438507	0.00811114	Male
CST3	3.67308	0.000440444	0.00811278	Male
IFT81	3.67314	0.00044035	0.00811278	Male
CD4	3.67255	0.00044121	0.00811932	Male
CDK2AP1	3.67	0.000444966	0.00815811	Male
DDX55	3.66789	0.000448108	0.00819632	Male
CRTC3	3.66713	0.000449243	0.00820368	Male
C1orf113	3.66645	0.000450258	0.00820953	Male
SDC2	3.66465	0.000452956	0.00823351	Male
ZNF331	3.66446	0.000453236	0.00823351	Male
CLEC7A	3.66239	0.000456366	0.00826006	Male
SGPP2	3.66249	0.000456215	0.00826006	Male
FAM192A	3.66066	0.000458994	0.00828865	Male
ATP6AP2	3.65941	0.000460916	0.00831202	Male
ZNF254	3.6584	0.000462449	0.00833209	Male
ABI3	3.65656	0.000465289	0.00833774	Male
DENND3	3.65762	0.000463648	0.00833774	Male
PARVG	3.6579	0.000463224	0.00833774	Male
ZNF34	3.65714	0.000464399	0.00833774	Male
APOB48R	3.65522	0.00046737	0.0083448	Male
SLC27A2	3.65538	0.000467109	0.0083448	Male
FAM78A	3.64736	0.000479694	0.00852641	Male
MPZ	3.64624	0.000481493	0.00854305	Male
MOCS2	3.64446	0.000484338	0.00857816	Male
HSFY2	3.64335	0.000486123	0.00860208	Male
TMEM149	3.64081	0.000490222	0.00865913	Male
PCDHB6	3.63968	0.00049206	0.00867612	Male
NRXN3	3.63747	0.000495669	0.00872422	Male
CLEC12A	3.63356	0.000502127	0.00879581	Male
COQ7	3.63366	0.000501962	0.00879581	Male
OSTF1	3.63339	0.000502402	0.00879581	Male
ZNF771	3.63403	0.000501339	0.00879581	Male
GPX8	3.62763	0.000512063	0.00891764	Male
SLC15A2	3.62627	0.000514361	0.00894193	Male
LAPTM5	3.62397	0.000518284	0.00899433	Male
NAT9	3.62059	0.0005241	0.0090635	Male
KCNMB1	3.61939	0.000526172	0.00909139	Male
GPSM3	3.61898	0.000526891	0.00909587	Male
POP4	3.61738	0.000529671	0.00912795	Male
VAMP7	3.61526	0.000533387	0.00917601	Male
DCI	3.61434	0.000534998	0.00919575	Male
SLC25A2	3.61378	0.000535994	0.0091969	Male
HIST1H4J	3.61324	0.000536942	0.00920519	Male
SETD1A	3.61286	0.000537614	0.00920874	Male
E2F4	3.61109	0.00054076	0.00925462	Male
LGALS9	3.60907	0.000544374	0.00930038	Male
JAM3	3.60853	0.000545352	0.00930865	Male
DNM2	3.60797	0.000546353	0.0093101	Male
NAA40	3.60532	0.000551129	0.00936729	Male
[truncated: 942 more rows]

## Sheet: BLCA
gene	stat	p	fdr	direction
C1S	-8.62145	1.32085e-16	2.47153e-12	Female
CPXM1	-8.5385	2.4421e-16	2.47153e-12	Female
CES1	-8.2694	1.7439e-15	8.82459e-12	Female
GLI2	-8.27129	1.72028e-15	8.82459e-12	Female
AEBP1	-8.18527	3.19549e-15	1.078e-11	Female
SFRP2	-8.20307	2.81219e-15	1.078e-11	Female
PDPN	-8.07159	7.19343e-15	2.08003e-11	Female
MSC	-7.93474	1.89025e-14	4.78258e-11	Female
MRGPRF	-7.90473	2.3326e-14	5.24602e-11	Female
EMILIN1	-7.85021	3.41312e-14	6.28045e-11	Female
LY86	-7.85874	3.21612e-14	6.28045e-11	Female
DCN	-7.81408	4.38767e-14	7.4009e-11	Female
NTNG2	-7.7995	4.85434e-14	7.55821e-11	Female
ISLR	-7.78425	5.39507e-14	7.80011e-11	Female
C1R	-7.74751	6.95447e-14	8.34166e-11	Female
CCDC80	-7.74644	7.00599e-14	8.34166e-11	Female
TPSB2	-7.75557	6.57823e-14	8.34166e-11	Female
SERPINF1	-7.73626	7.51503e-14	8.45066e-11	Female
PRRX2	-7.71253	8.84868e-14	9.11016e-11	Female
TPSAB1	-7.71004	9.00169e-14	9.11016e-11	Female
COPZ2	-7.69683	9.85667e-14	9.50043e-11	Female
MEG3	-7.67056	1.18015e-13	1.0423e-10	Female
PID1	-7.67004	1.18437e-13	1.0423e-10	Female
GATA6	-7.65785	1.28746e-13	1.08581e-10	Female
FAM20C	-7.62337	1.62926e-13	1.31912e-10	Female
LUM	-7.60547	1.84049e-13	1.40265e-10	Female
SCARF2	-7.60305	1.87103e-13	1.40265e-10	Female
GPR68	-7.59552	1.96939e-13	1.42366e-10	Female
CHRDL2	-7.56818	2.37126e-13	1.54828e-10	Female
KIAA1755	-7.56862	2.36419e-13	1.54828e-10	Female
TAGLN	-7.56891	2.35953e-13	1.54828e-10	Female
ARSI	-7.51616	3.37122e-13	2.1324e-10	Female
NNMT	-7.47545	4.43449e-13	2.71996e-10	Female
CD37	-7.43347	5.87671e-13	3.49854e-10	Female
COL5A1	-7.4234	6.28618e-13	3.63539e-10	Female
FGF7	-7.40434	7.13951e-13	3.9057e-10	Female
POSTN	-7.40701	7.0134e-13	3.9057e-10	Female
COL3A1	-7.38976	7.86834e-13	4.18218e-10	Female
LY96	-7.38345	8.20635e-13	4.18218e-10	Female
PDLIM2	-7.37868	8.47138e-13	4.18218e-10	Female
PODN	-7.38207	8.28234e-13	4.18218e-10	Female
PRRX1	-7.3603	9.57284e-13	4.61343e-10	Female
COL6A3	-7.35028	1.0231e-12	4.81592e-10	Female
HTRA3	-7.33393	1.14027e-12	5.24549e-10	Female
C13orf18	-7.32312	1.22492e-12	5.50967e-10	Female
OLFML3	-7.31705	1.27516e-12	5.61096e-10	Female
HSPB2	-7.29051	1.51948e-12	6.54379e-10	Female
CEACAM4	-7.27472	1.68619e-12	7.11044e-10	Female
FIBIN	-7.27058	1.73277e-12	7.15777e-10	Female
KCNJ8	-7.25843	1.87698e-12	7.59839e-10	Female
CH25H	-7.25177	1.96095e-12	7.71022e-10	Female
GREM1	-7.25024	1.98079e-12	7.71022e-10	Female
COL1A2	-7.24678	2.02627e-12	7.73845e-10	Female
MFAP4	-7.2352	2.18638e-12	8.19529e-10	Female
HIC1	-7.23165	2.23793e-12	8.23599e-10	Female
EFEMP1	-7.2271	2.30566e-12	8.33371e-10	Female
COL1A1	-7.21551	2.48754e-12	8.83339e-10	Female
SSC5D	-7.20715	2.62744e-12	9.1693e-10	Female
BTK	-7.20019	2.74966e-12	9.31468e-10	Female
GYPC	-7.19557	2.83395e-12	9.31468e-10	Female
LOC399959	-7.19454	2.85317e-12	9.31468e-10	Female
P4HA3	-7.19648	2.81721e-12	9.31468e-10	Female
CCL19	-7.19057	2.92797e-12	9.40716e-10	Female
CPA3	-7.18726	2.99198e-12	9.4626e-10	Female
IFFO1	-7.17613	3.21737e-12	9.90557e-10	Female
TMEM90B	-7.17553	3.22992e-12	9.90557e-10	Female
RARRES2	-7.16864	3.37823e-12	1.02058e-09	Female
COL6A2	-7.15859	3.60683e-12	1.06282e-09	Female
PLA2G5	-7.15761	3.62988e-12	1.06282e-09	Female
SGCD	-7.15569	3.67556e-12	1.06282e-09	Female
CDH11	-7.13315	4.25528e-12	1.21312e-09	Female
CAMK2A	-7.12661	4.43963e-12	1.23215e-09	Female
ITGAX	-7.12647	4.44379e-12	1.23215e-09	Female
TPST1	-7.12305	4.54329e-12	1.24271e-09	Female
HAND2	-7.10247	5.19122e-12	1.40101e-09	Female
NEGR1	-7.06212	6.73583e-12	1.74795e-09	Female
PIK3R5	-7.06359	6.67229e-12	1.74795e-09	Female
SASH3	-7.0643	6.64205e-12	1.74795e-09	Female
CSDC2	-7.05864	6.88875e-12	1.75185e-09	Female
TBXAS1	-7.05785	6.92398e-12	1.75185e-09	Female
IRF8	-7.0511	7.23107e-12	1.80696e-09	Female
ANXA6	-7.03538	8.00027e-12	1.96066e-09	Female
BCL2A1	-7.03461	8.03984e-12	1.96066e-09	Female
ACTA2	-7.02226	8.70314e-12	1.99035e-09	Female
PCOLCE	-7.02874	8.34856e-12	1.99035e-09	Female
PDLIM3	-7.02192	8.72239e-12	1.99035e-09	Female
PTGFR	-7.02674	8.45671e-12	1.99035e-09	Female
SERPINE2	-7.02236	8.69759e-12	1.99035e-09	Female
SOD3	-7.0214	8.75158e-12	1.99035e-09	Female
DES	-7.00888	9.48255e-12	2.10919e-09	Female
MFRP	-7.00979	9.42721e-12	2.10919e-09	Female
BGN	-7.00713	9.58958e-12	2.10981e-09	Female
ADAM33	-7.00523	9.70697e-12	2.11267e-09	Female
PODNL1	-6.99893	1.01061e-11	2.17615e-09	Female
POU2AF1	-6.99697	1.02335e-11	2.18038e-09	Female
PLN	-6.98035	1.13806e-11	2.39952e-09	Female
AIF1	-6.9775	1.15897e-11	2.41842e-09	Female
GLT8D2	-6.96696	1.23954e-11	2.56016e-09	Female
GPR132	-6.96366	1.26596e-11	2.58832e-09	Female
C9orf3	-6.96099	1.2877e-11	2.60643e-09	Female
TMEM119	-6.9562	1.32758e-11	2.66055e-09	Female
MDGA1	-6.95381	1.34795e-11	2.67489e-09	Female
CTGF	-6.95211	1.3626e-11	2.67771e-09	Female
HSPB6	-6.94249	1.44855e-11	2.81925e-09	Female
CD79A	-6.94096	1.46275e-11	2.81976e-09	Female
FERMT3	-6.92639	1.60459e-11	3.06402e-09	Female
CD180	-6.91862	1.68575e-11	3.1889e-09	Female
CNN1	-6.91609	1.71298e-11	3.21041e-09	Female
SPON1	-6.90422	1.84677e-11	3.4294e-09	Female
CRISPLD2	-6.87759	2.18548e-11	3.98524e-09	Female
LRRC32	-6.8778	2.18259e-11	3.98524e-09	Female
TNFAIP8L2	-6.86744	2.33007e-11	4.21097e-09	Female
WDFY4	-6.86365	2.38641e-11	4.27464e-09	Female
PTGDS	-6.86057	2.43324e-11	4.32028e-09	Female
GFPT2	-6.84809	2.63215e-11	4.59288e-09	Female
LRRC15	-6.84839	2.62717e-11	4.59288e-09	Female
LST1	-6.84584	2.66973e-11	4.61863e-09	Female
AMICA1	-6.84355	2.70851e-11	4.646e-09	Female
MMP2	-6.83457	2.86579e-11	4.8745e-09	Female
GLIS1	-6.82565	3.0308e-11	5.1122e-09	Female
LTB	-6.82128	3.11519e-11	5.21113e-09	Female
GGT5	-6.81961	3.14797e-11	5.2228e-09	Female
NAPSB	-6.811	3.32266e-11	5.4678e-09	Female
THY1	-6.79883	3.58586e-11	5.85334e-09	Female
CD33	-6.79465	3.68083e-11	5.9603e-09	Female
TNFRSF8	-6.79017	3.78529e-11	6.0808e-09	Female
ALDH2	-6.7885	3.82517e-11	6.09647e-09	Female
AG2	-6.78401	3.9339e-11	6.17256e-09	Female
MMP23B	-6.78429	3.9272e-11	6.17256e-09	Female
CYTH4	-6.77939	4.04902e-11	6.30433e-09	Female
LMCD1	-6.77048	4.28079e-11	6.61431e-09	Female
GAS7	-6.76698	4.3752e-11	6.62429e-09	Female
HSD11B1	-6.76661	4.38543e-11	6.62429e-09	Female
VCAN	-6.76898	4.32095e-11	6.62429e-09	Female
SFRP4	-6.76421	4.45142e-11	6.67417e-09	Female
SLA	-6.76012	4.56629e-11	6.79606e-09	Female
TWIST2	-6.75865	4.60836e-11	6.80859e-09	Female
CCDC8	-6.75446	4.73017e-11	6.93793e-09	Female
RNASE6	-6.75048	4.84902e-11	7.06108e-09	Female
PTGER2	-6.7271	5.60749e-11	8.08882e-09	Female
SIGLEC10	-6.72632	5.63472e-11	8.08882e-09	Female
BLK	-6.71578	6.01533e-11	8.55101e-09	Female
MPEG1	-6.71439	6.06737e-11	8.55101e-09	Female
NCF1B	-6.71397	6.08343e-11	8.55101e-09	Female
ADAMTS10	-6.70875	6.2835e-11	8.71126e-09	Female
DACT3	-6.70966	6.248e-11	8.71126e-09	Female
CHI3L1	-6.70493	6.43395e-11	8.74294e-09	Female
DPT	-6.70488	6.43594e-11	8.74294e-09	Female
KIAA1644	-6.70547	6.41233e-11	8.74294e-09	Female
CD53	-6.70058	6.60945e-11	8.84556e-09	Female
HCK	-6.70051	6.61228e-11	8.84556e-09	Female
EVI2A	-6.69713	6.75205e-11	8.93256e-09	Female
FAP	-6.68419	7.31432e-11	9.513e-09	Female
HEPH	-6.6838	7.33179e-11	9.513e-09	Female
KLHL6	-6.68492	7.28154e-11	9.513e-09	Female
MYL9	-6.6804	7.48736e-11	9.65297e-09	Female
C1orf162	-6.67935	7.53633e-11	9.65461e-09	Female
CD300LB	-6.67688	7.65218e-11	9.74137e-09	Female
MXRA8	-6.67319	7.82825e-11	9.90322e-09	Female
TGFB3	-6.66487	8.24031e-11	1.03598e-08	Female
COMP	-6.65455	8.78118e-11	1.08926e-08	Female
COX7A1	-6.65396	8.81327e-11	1.08926e-08	Female
CRYAB	-6.65246	8.89507e-11	1.08926e-08	Female
CTSK	-6.65263	8.88567e-11	1.08926e-08	Female
FAM180A	-6.65177	8.93318e-11	1.08926e-08	Female
EMP3	-6.64367	9.38955e-11	1.13805e-08	Female
VIM	-6.64039	9.58063e-11	1.14747e-08	Female
THBS2	-6.63911	9.65654e-11	1.14975e-08	Female
RCN3	-6.63813	9.71484e-11	1.14993e-08	Female
CTSG	-6.63589	9.84939e-11	1.15588e-08	Female
GAS1	-6.63539	9.87929e-11	1.15588e-08	Female
NEXN	-6.62865	1.02967e-10	1.19095e-08	Female
CD300LF	-6.6263	1.04466e-10	1.19463e-08	Female
IL16	-6.62679	1.04152e-10	1.19463e-08	Female
CHST1	-6.61904	1.0922e-10	1.24198e-08	Female
MRC2	-6.61434	1.12418e-10	1.2712e-08	Female
DNASE1L3	-6.59984	1.2285e-10	1.37073e-08	Female
MS4A6A	-6.59931	1.23251e-10	1.37073e-08	Female
SPON2	-6.60094	1.22025e-10	1.37073e-08	Female
PARVG	-6.58923	1.31086e-10	1.4499e-08	Female
SPI1	-6.5879	1.32154e-10	1.45376e-08	Female
CD79B	-6.58635	1.33414e-10	1.45969e-08	Female
COL5A2	-6.5839	1.35425e-10	1.46585e-08	Female
TYROBP	-6.58422	1.35154e-10	1.46585e-08	Female
HTRA1	-6.57889	1.39631e-10	1.49845e-08	Female
ODZ3	-6.57768	1.40658e-10	1.49845e-08	Female
TMEM176B	-6.5779	1.40472e-10	1.49845e-08	Female
LOC728264	-6.57443	1.4348e-10	1.52051e-08	Female
LRP1	-6.572	1.45621e-10	1.53516e-08	Female
FAM20A	-6.55626	1.60273e-10	1.68087e-08	Female
FLRT2	-6.55496	1.61548e-10	1.68552e-08	Female
NTM	-6.5519	1.64583e-10	1.70838e-08	Female
CPNE5	-6.55094	1.65549e-10	1.70963e-08	Female
TPM2	-6.54962	1.66888e-10	1.71471e-08	Female
FMOD	-6.5401	1.76825e-10	1.79855e-08	Female
MAPK11	-6.54017	1.7675e-10	1.79855e-08	Female
CEACAM3	-6.53379	1.83731e-10	1.85945e-08	Female
FNDC1	-6.5316	1.86184e-10	1.86812e-08	Female
RHOH	-6.53057	1.87357e-10	1.86812e-08	Female
SORCS2	-6.5307	1.87208e-10	1.86812e-08	Female
PDGFRA	-6.5267	1.91807e-10	1.90312e-08	Female
CD248	-6.52042	1.99248e-10	1.96598e-08	Female
GGTA1	-6.51973	2.00085e-10	1.96598e-08	Female
BTLA	-6.51129	2.1058e-10	2.0574e-08	Female
ZNF469	-6.51063	2.11422e-10	2.0574e-08	Female
ACTG2	-6.50513	2.18581e-10	2.11688e-08	Female
GPR183	-6.50285	2.21608e-10	2.13598e-08	Female
HSPB7	-6.50112	2.23949e-10	2.14832e-08	Female
CD22	-6.49941	2.26268e-10	2.16033e-08	Female
CD86	-6.49725	2.29242e-10	2.17844e-08	Female
FPR1	-6.49517	2.32142e-10	2.18548e-08	Female
WBSCR17	-6.49592	2.31089e-10	2.18548e-08	Female
CXorf21	-6.49398	2.33814e-10	2.19103e-08	Female
C1QA	-6.49	2.39504e-10	2.23401e-08	Female
MS4A2	-6.47455	2.62902e-10	2.44101e-08	Female
LILRA5	-6.47359	2.64428e-10	2.44397e-08	Female
SELPLG	-6.47055	2.69322e-10	2.47221e-08	Female
SULF2	-6.47018	2.69926e-10	2.47221e-08	Female
CMAH	-6.46615	2.76554e-10	2.51021e-08	Female
CYTIP	-6.46615	2.76556e-10	2.51021e-08	Female
CD300A	-6.46275	2.82273e-10	2.55067e-08	Female
CLEC11A	-6.45952	2.87808e-10	2.58912e-08	Female
SULF1	-6.45756	2.91231e-10	2.60832e-08	Female
NFAM1	-6.45634	2.93377e-10	2.61597e-08	Female
COL16A1	-6.45385	2.97793e-10	2.6437e-08	Female
STAB1	-6.44207	3.19635e-10	2.82521e-08	Female
PNMAL2	-6.43925	3.251e-10	2.86102e-08	Female
OMD	-6.43742	3.28685e-10	2.88005e-08	Female
PPAPDC3	-6.43387	3.35763e-10	2.92939e-08	Female
P2RX1	-6.4273	3.49241e-10	3.0339e-08	Female
SVEP1	-6.42217	3.6015e-10	3.1153e-08	Female
MS4A4A	-6.41729	3.70826e-10	3.19399e-08	Female
LILRB3	-6.41321	3.79984e-10	3.25508e-08	Female
SCN1B	-6.41271	3.81134e-10	3.25508e-08	Female
C19orf35	-6.40496	3.99198e-10	3.39502e-08	Female
CD19	-6.40248	4.05168e-10	3.43138e-08	Female
BATF3	-6.40155	4.07432e-10	3.43618e-08	Female
LMOD1	-6.4001	4.10965e-10	3.45159e-08	Female
TNFAIP6	-6.39789	4.16419e-10	3.48295e-08	Female
ABI3BP	-6.39408	4.25996e-10	3.54839e-08	Female
FOLR2	-6.39119	4.33432e-10	3.59553e-08	Female
NBLA00301	-6.38801	4.41709e-10	3.64924e-08	Female
FBN1	-6.38657	4.45534e-10	3.65483e-08	Female
SMOC2	-6.38639	4.45997e-10	3.65483e-08	Female
NCF1	-6.37836	4.67863e-10	3.81856e-08	Female
ARHGAP9	-6.37632	4.73586e-10	3.84974e-08	Female
OLFML1	-6.37357	4.8142e-10	3.89777e-08	Female
PALLD	-6.36779	4.98253e-10	4.01798e-08	Female
CERKL	-6.36053	5.20252e-10	4.17874e-08	Female
KCNE4	-6.35829	5.2721e-10	4.20129e-08	Female
SRGN	-6.35873	5.25827e-10	4.20129e-08	Female
GPC6	-6.35318	5.43462e-10	4.29326e-08	Female
MYO1F	-6.35232	5.46246e-10	4.29326e-08	Female
RSPO3	-6.35202	5.47237e-10	4.29326e-08	Female
TNFRSF13B	-6.35292	5.44321e-10	4.29326e-08	Female
ALOX5AP	-6.34366	5.75049e-10	4.4596e-08	Female
DOK5	-6.34405	5.73733e-10	4.4596e-08	Female
WAS	-6.33839	5.93305e-10	4.58362e-08	Female
CTHRC1	-6.33551	6.03541e-10	4.64497e-08	Female
NCF1C	-6.33386	6.09445e-10	4.67264e-08	Female
ADAMDEC1	-6.32944	6.2564e-10	4.76075e-08	Female
PNOC	-6.32958	6.25102e-10	4.76075e-08	Female
THBS1	-6.32114	6.57147e-10	4.98177e-08	Female
CD52	-6.31004	7.01697e-10	5.29964e-08	Female
NCKAP1L	-6.30848	7.08203e-10	5.3289e-08	Female
C1QB	-6.3077	7.11474e-10	5.33368e-08	Female
CD27	-6.30682	7.15185e-10	5.34172e-08	Female
MN1	-6.30559	7.2038e-10	5.36074e-08	Female
HSPA12B	-6.30442	7.25387e-10	5.37823e-08	Female
ACAP1	-6.30347	7.29433e-10	5.38849e-08	Female
LAT2	-6.29948	7.46815e-10	5.49683e-08	Female
COL8A2	-6.29769	7.54738e-10	5.51504e-08	Female
PDGFRB	-6.29801	7.53353e-10	5.51504e-08	Female
ZFPM2	-6.29612	7.61783e-10	5.5465e-08	Female
CHRD	-6.2928	7.76828e-10	5.61563e-08	Female
TMEM176A	-6.29325	7.74775e-10	5.61563e-08	Female
AOAH	-6.29193	7.80834e-10	5.6245e-08	Female
CCIN	-6.2857	8.1e-10	5.8139e-08	Female
LILRA2	-6.28108	8.32354e-10	5.95324e-08	Female
BNC2	-6.27782	8.48459e-10	6.03012e-08	Female
CD48	-6.2777	8.49061e-10	6.03012e-08	Female
DOK2	-6.27293	8.73233e-10	6.18011e-08	Female
GRK5	-6.26842	8.96692e-10	6.30713e-08	Female
ZCCHC24	-6.26828	8.97413e-10	6.30713e-08	Female
LRRC25	-6.26627	9.08114e-10	6.36026e-08	Female
C4A	-6.2624	9.28997e-10	6.48408e-08	Female
C1orf38	-6.25343	9.79205e-10	6.75539e-08	Female
FILIP1L	-6.2525	9.84555e-10	6.75539e-08	Female
HDC	-6.25352	9.78691e-10	6.75539e-08	Female
LAIR1	-6.25262	9.83877e-10	6.75539e-08	Female
PRR16	-6.25465	9.72216e-10	6.75539e-08	Female
EVI2B	-6.24813	1.0101e-09	6.90724e-08	Female
CCL11	-6.24641	1.02035e-09	6.95385e-08	Female
HPGDS	-6.24275	1.04246e-09	7.08071e-08	Female
CYS1	-6.23906	1.06526e-09	7.21133e-08	Female
CXCL12	-6.23796	1.07209e-09	7.23342e-08	Female
CNRIP1	-6.23602	1.08433e-09	7.2915e-08	Female
IL21R	-6.2349	1.09151e-09	7.2915e-08	Female
SLC22A3	-6.2349	1.0915e-09	7.2915e-08	Female
ROR2	-6.23319	1.10249e-09	7.34063e-08	Female
GRASP	-6.22448	1.1601e-09	7.68301e-08	Female
NBL1	-6.22427	1.1615e-09	7.68301e-08	Female
CXCR5	-6.22054	1.18707e-09	7.82653e-08	Female
GAS6	-6.21881	1.19915e-09	7.88055e-08	Female
ARL4C	-6.21805	1.20451e-09	7.89011e-08	Female
ZNF521	-6.21545	1.22292e-09	7.98487e-08	Female
CD28	-6.21252	1.24396e-09	8.09617e-08	Female
IL10RA	-6.20593	1.29271e-09	8.35988e-08	Female
VENTX	-6.20593	1.29274e-09	8.35988e-08	Female
VPREB3	-6.20416	1.30617e-09	8.41983e-08	Female
MYO1G	-6.2018	1.32426e-09	8.50931e-08	Female
BIN2	-6.19386	1.38695e-09	8.83985e-08	Female
C10orf72	-6.19261	1.39702e-09	8.83985e-08	Female
DACT1	-6.19335	1.39107e-09	8.83985e-08	Female
LPAR1	-6.19255	1.39754e-09	8.83985e-08	Female
VSIG4	-6.19399	1.38587e-09	8.83985e-08	Female
COL14A1	-6.19158	1.40542e-09	8.86202e-08	Female
MGC29506	-6.19091	1.4109e-09	8.86896e-08	Female
MRVI1	-6.18512	1.45923e-09	9.14438e-08	Female
OLFM1	-6.18202	1.48578e-09	9.28202e-08	Female
CPXM2	-6.18035	1.50033e-09	9.34408e-08	Female
RASGRP2	-6.17924	1.50999e-09	9.37537e-08	Female
PLEK	-6.176	1.53872e-09	9.52455e-08	Female
NCR3	-6.17295	1.56624e-09	9.66531e-08	Female
TCL1A	-6.16946	1.59822e-09	9.83271e-08	Female
IRF4	-6.16675	1.62357e-09	9.95842e-08	Female
C17orf87	-6.16434	1.64642e-09	1.00377e-07	Female
ITGB2	-6.16465	1.64345e-09	1.00377e-07	Female
GPR34	-6.16127	1.67598e-09	1.01872e-07	Female
DOCK2	-6.15643	1.72367e-09	1.04457e-07	Female
FCER2	-6.15421	1.74599e-09	1.05483e-07	Female
GLIPR1	-6.15372	1.75101e-09	1.05483e-07	Female
MS4A1	-6.15263	1.76203e-09	1.05832e-07	Female
GSTM5	-6.14819	1.80789e-09	1.08232e-07	Female
SLC2A5	-6.14774	1.8127e-09	1.08232e-07	Female
SAMSN1	-6.14562	1.83508e-09	1.09247e-07	Female
KLF2	-6.1427	1.8663e-09	1.1078e-07	Female
WIPF1	-6.13773	1.92068e-09	1.13674e-07	Female
SIRPA	-6.13607	1.93921e-09	1.14104e-07	Female
TIMP2	-6.13653	1.93401e-09	1.14104e-07	Female
PRKCDBP	-6.13479	1.95362e-09	1.14618e-07	Female
MMP9	-6.13103	1.99646e-09	1.16793e-07	Female
TRAF3IP3	-6.13025	2.00546e-09	1.16981e-07	Female
RGS2	-6.12915	2.01832e-09	1.17393e-07	Female
POM121L9P	-6.12451	2.07308e-09	1.20233e-07	Female
IGF1	-6.12356	2.08448e-09	1.20549e-07	Female
GAB3	-6.12181	2.10561e-09	1.21423e-07	Female
LOC606724	-6.12122	2.11286e-09	1.21495e-07	Female
PDZRN3	-6.11338	2.21046e-09	1.26748e-07	Female
CENPP	-6.11005	2.25335e-09	1.28842e-07	Female
GPR124	-6.10846	2.27399e-09	1.29656e-07	Female
CMKLR1	-6.10318	2.34423e-09	1.33286e-07	Female
OSCAR	-6.10098	2.37403e-09	1.34601e-07	Female
CFP	-6.09979	2.39039e-09	1.3515e-07	Female
CALD1	-6.09872	2.40517e-09	1.35607e-07	Female
PTGS1	-6.09582	2.4456e-09	1.37504e-07	Female
NFATC1	-6.09396	2.47181e-09	1.38592e-07	Female
EBI3	-6.09344	2.47928e-09	1.38628e-07	Female
TWIST1	-6.09106	2.51345e-09	1.40151e-07	Female
ADORA3	-6.08909	2.54195e-09	1.41351e-07	Female
LIMS2	-6.08583	2.59001e-09	1.43629e-07	Female
SPIB	-6.08507	2.6013e-09	1.4386e-07	Female
CD14	-6.0843	2.61288e-09	1.44107e-07	Female
GNGT2	-6.08018	2.67532e-09	1.46751e-07	Female
MSRB3	-6.08045	2.6712e-09	1.46751e-07	Female
SGIP1	-6.07832	2.70414e-09	1.47931e-07	Female
COL6A1	-6.07379	2.77523e-09	1.51411e-07	Female
PCBP3	-6.06841	2.86206e-09	1.55728e-07	Female
PTGIR	-6.06535	2.91272e-09	1.5806e-07	Female
SELM	-6.06482	2.92158e-09	1.58117e-07	Female
TMEM158	-6.06379	2.93889e-09	1.58629e-07	Female
FCGR1A	-6.06063	2.99243e-09	1.6109e-07	Female
KCNMB1	-6.05535	3.08432e-09	1.65596e-07	Female
RASGRP4	-6.05407	3.10689e-09	1.66367e-07	Female
ADAMTS2	-6.05278	3.12986e-09	1.67154e-07	Female
ATP8B2	-6.05119	3.15854e-09	1.67801e-07	Female
FTL	-6.05163	3.15056e-09	1.67801e-07	Female
HS3ST2	-6.05028	3.17495e-09	1.68231e-07	Female
EGFL7	-6.0492	3.19467e-09	1.68676e-07	Female
IL2RA	-6.0489	3.20002e-09	1.68676e-07	Female
RAB3IL1	-6.04441	3.28328e-09	1.72168e-07	Female
RUNX3	-6.0417	3.33443e-09	1.74399e-07	Female
PRICKLE1	-6.04065	3.35452e-09	1.74997e-07	Female
C1QC	-6.03467	3.47098e-09	1.80607e-07	Female
LHFP	-6.0335	3.49408e-09	1.81343e-07	Female
C22orf9	-6.01801	3.81645e-09	1.96983e-07	Female
PIK3R6	-6.01763	3.82463e-09	1.96983e-07	Female
TCTEX1D1	-6.01849	3.80612e-09	1.96983e-07	Female
FCGR2B	-6.01388	3.90726e-09	2.00728e-07	Female
GLI1	-6.01223	3.9439e-09	2.01411e-07	Female
LDLRAD2	-6.01221	3.94438e-09	2.01411e-07	Female
MS4A7	-6.01194	3.95041e-09	2.01411e-07	Female
NCF2	-6.01025	3.98865e-09	2.02342e-07	Female
SIGLECP3	-6.0106	3.98061e-09	2.02342e-07	Female
ADAMTS14	-6.00719	4.05866e-09	2.05378e-07	Female
CD163	-6.00542	4.09962e-09	2.06894e-07	Female
MRC1	-6.00502	4.10905e-09	2.06894e-07	Female
OGN	-6.00008	4.22598e-09	2.12253e-07	Female
SLC7A7	-5.9992	4.24701e-09	2.12782e-07	Female
FXYD1	-5.99395	4.3755e-09	2.18319e-07	Female
FAM26E	-5.99192	4.42605e-09	2.20117e-07	Female
AMPH	-5.98791	4.52795e-09	2.24633e-07	Female
CSF2RB	-5.98728	4.54406e-09	2.24881e-07	Female
ARHGAP24	-5.98416	4.62524e-09	2.2834e-07	Female
FCAMR	-5.98178	4.68805e-09	2.30878e-07	Female
RSPO2	-5.97715	4.81242e-09	2.36428e-07	Female
PXDN	-5.97616	4.83948e-09	2.37181e-07	Female
ST6GALNAC5	-5.97525	4.86447e-09	2.3783e-07	Female
CD209	-5.97406	4.89732e-09	2.38285e-07	Female
FAM19A5	-5.97412	4.89567e-09	2.38285e-07	Female
GAPT	-5.97174	4.96212e-09	2.40859e-07	Female
CSF1R	-5.96812	5.06456e-09	2.44444e-07	Female
EDNRA	-5.96826	5.06067e-09	2.44444e-07	Female
NRP2	-5.96743	5.08428e-09	2.44444e-07	Female
PTH1R	-5.96189	5.24603e-09	2.51623e-07	Female
SRPX	-5.9559	5.4264e-09	2.59659e-07	Female
CES4	-5.95527	5.44585e-09	2.59975e-07	Female
CR1	-5.95098	5.57935e-09	2.65098e-07	Female
LILRB4	-5.94904	5.64074e-09	2.67387e-07	Female
ADAM12	-5.94645	5.72368e-09	2.70685e-07	Female
SH3RF3	-5.94084	5.9073e-09	2.78717e-07	Female
ZEB2	-5.93917	5.96336e-09	2.80708e-07	Female
C3AR1	-5.93833	5.9914e-09	2.80856e-07	Female
FCGR2A	-5.93825	5.99425e-09	2.80856e-07	Female
MFAP5	-5.92908	6.31178e-09	2.9505e-07	Female
ACTC1	-5.92767	6.36187e-09	2.96707e-07	Female
CADM3	-5.92704	6.38432e-09	2.97069e-07	Female
MAPK12	-5.92277	6.53945e-09	3.03589e-07	Female
APOE	-5.91818	6.71036e-09	3.10811e-07	Female
SDS	-5.91713	6.75001e-09	3.11934e-07	Female
FCGR1B	-5.91512	6.82657e-09	3.14753e-07	Female
FCRL5	-5.91142	6.96975e-09	3.19897e-07	Female
RASAL3	-5.91151	6.96645e-09	3.19897e-07	Female
STOM	-5.90929	7.05377e-09	3.23021e-07	Female
FBLN5	-5.90833	7.09148e-09	3.24015e-07	Female
CCL14	-5.90676	7.15432e-09	3.2615e-07	Female
TLR10	-5.90407	7.263e-09	3.30361e-07	Female
SLCO2B1	-5.8931	7.72349e-09	3.50518e-07	Female
PRKCB	-5.89259	7.74529e-09	3.50721e-07	Female
SCT	-5.88691	7.99556e-09	3.61246e-07	Female
APLNR	-5.88557	8.05564e-09	3.62087e-07	Female
LOC653786	-5.88528	8.06845e-09	3.62087e-07	Female
PTGDR	-5.8854	8.06323e-09	3.62087e-07	Female
SLAMF6	-5.88463	8.09802e-09	3.62087e-07	Female
COL23A1	-5.88126	8.25191e-09	3.67901e-07	Female
ITGA11	-5.87828	8.39057e-09	3.73261e-07	Female
COLEC12	-5.87387	8.59961e-09	3.81721e-07	Female
MT1L	-5.87306	8.63841e-09	3.82604e-07	Female
HS3ST3A1	-5.87242	8.66947e-09	3.83141e-07	Female
FUT7	-5.86915	8.82903e-09	3.89343e-07	Female
SFRP1	-5.8678	8.89561e-09	3.91426e-07	Female
AXL	-5.8666	8.95563e-09	3.93213e-07	Female
HAVCR2	-5.8658	8.99546e-09	3.94106e-07	Female
FCER1G	-5.86257	9.15915e-09	4.00411e-07	Female
CD5	-5.85749	9.42207e-09	4.11018e-07	Female
COL8A1	-5.85683	9.45651e-09	4.11633e-07	Female
ST8SIA1	-5.85515	9.54532e-09	4.14607e-07	Female
CYBRD1	-5.84734	9.96945e-09	4.32102e-07	Female
FBLN2	-5.84433	1.01376e-08	4.3845e-07	Female
PLA2G2D	-5.8438	1.01674e-08	4.38802e-07	Female
SPARC	-5.84075	1.03413e-08	4.45359e-07	Female
MAF	-5.83792	1.05052e-08	4.51458e-07	Female
LILRB2	-5.83482	1.06875e-08	4.58317e-07	Female
SPHK1	-5.82989	1.0984e-08	4.70037e-07	Female
ADRA2A	-5.82885	1.10478e-08	4.71769e-07	Female
OTOA	-5.82648	1.11941e-08	4.7701e-07	Female
PTRF	-5.82602	1.12225e-08	4.77218e-07	Female
TLL1	-5.82519	1.12743e-08	4.78415e-07	Female
TNC	-5.82087	1.15478e-08	4.87972e-07	Female
GPR1	-5.82043	1.15756e-08	4.88127e-07	Female
CORO1A	-5.81377	1.20105e-08	5.05147e-07	Female
HEG1	-5.81349	1.20291e-08	5.05147e-07	Female
PTPRCAP	-5.80751	1.24339e-08	5.21066e-07	Female
CYR61	-5.80531	1.25863e-08	5.25413e-07	Female
SCRG1	-5.80526	1.25896e-08	5.25413e-07	Female
NRG1	-5.80337	1.27219e-08	5.29842e-07	Female
CCL21	-5.80015	1.29503e-08	5.38248e-07	Female
EMP1	-5.7958	1.32654e-08	5.50214e-07	Female
HAS1	-5.79458	1.33548e-08	5.52792e-07	Female
CXCR4	-5.79328	1.34513e-08	5.55649e-07	Female
COL18A1	-5.78363	1.41866e-08	5.84827e-07	Female
C20orf103	-5.78294	1.42406e-08	5.85862e-07	Female
TBC1D10C	-5.78181	1.43298e-08	5.88335e-07	Female
MEOX2	-5.7779	1.46418e-08	5.99929e-07	Female
ABCC9	-5.77413	1.49489e-08	6.11273e-07	Female
C5AR1	-5.7734	1.50091e-08	6.12499e-07	Female
ABI3	-5.76827	1.54392e-08	6.27521e-07	Female
C1orf54	-5.76836	1.54314e-08	6.27521e-07	Female
CCL26	-5.76682	1.55629e-08	6.31279e-07	Female
ADRB3	-5.76417	1.57909e-08	6.39247e-07	Female
STAP1	-5.76264	1.59241e-08	6.43351e-07	Female
PRELP	-5.76069	1.60958e-08	6.48996e-07	Female
PTPN7	-5.75408	1.66913e-08	6.71668e-07	Female
ECM2	-5.75277	1.68114e-08	6.75158e-07	Female
SLC24A3	-5.7502	1.70507e-08	6.83412e-07	Female
CD6	-5.7496	1.71066e-08	6.83768e-07	Female
GIMAP1	-5.74938	1.71271e-08	6.83768e-07	Female
CLEC10A	-5.74865	1.71959e-08	6.85161e-07	Female
TREM2	-5.744	1.76406e-08	7.00125e-07	Female
SGCA	-5.74273	1.77632e-08	7.03609e-07	Female
BOC	-5.74125	1.79076e-08	7.07944e-07	Female
GPR77	-5.74044	1.79873e-08	7.09708e-07	Female
KIAA0125	-5.73995	1.8036e-08	7.10247e-07	Female
CTSB	-5.73077	1.89654e-08	7.45397e-07	Female
ADAM6	-5.72866	1.91861e-08	7.52607e-07	Female
ADAMTS1	-5.72663	1.94001e-08	7.5953e-07	Female
FBXL7	-5.7256	1.95103e-08	7.62372e-07	Female
COL13A1	-5.72486	1.95892e-08	7.63978e-07	Female
GXYLT2	-5.72	2.01167e-08	7.83043e-07	Female
PCDH7	-5.71942	2.01807e-08	7.84026e-07	Female
GEM	-5.71585	2.05772e-08	7.97897e-07	Female
CASQ2	-5.7106	2.1176e-08	8.17984e-07	Female
ECM1	-5.70844	2.14265e-08	8.26083e-07	Female
LGI2	-5.70554	2.17691e-08	8.37695e-07	Female
PSD	-5.70298	2.20743e-08	8.47829e-07	Female
COL5A3	-5.70195	2.21986e-08	8.50988e-07	Female
CLEC4E	-5.70121	2.22882e-08	8.52808e-07	Female
C5orf20	-5.69629	2.28944e-08	8.74351e-07	Female
C6orf97	-5.69476	2.3086e-08	8.80008e-07	Female
STK32B	-5.69274	2.33413e-08	8.86401e-07	Female
MAX	-5.68706	2.40731e-08	9.12477e-07	Female
FCRL3	-5.68633	2.41687e-08	9.14391e-07	Female
C1orf70	-5.68211	2.47307e-08	9.31349e-07	Female
ITGA5	-5.68158	2.4801e-08	9.31349e-07	Female
RAMP1	-5.68217	2.47224e-08	9.31349e-07	Female
LOC100130872	-5.67997	2.50199e-08	9.37829e-07	Female
PLEKHO2	-5.67672	2.54649e-08	9.52744e-07	Female
MYL3	-5.67259	2.60423e-08	9.72551e-07	Female
HCLS1	-5.67087	2.62869e-08	9.79876e-07	Female
DKK3	-5.66987	2.64296e-08	9.82847e-07	Female
S100B	-5.66963	2.64637e-08	9.82847e-07	Female
GZMK	-5.6682	2.66707e-08	9.88721e-07	Female
CYBB	-5.65953	2.79538e-08	1.03439e-06	Female
KIAA0748	-5.65598	2.84965e-08	1.05255e-06	Female
DIO2	-5.65517	2.86222e-08	1.05527e-06	Female
LOC541471	-5.65229	2.90707e-08	1.06986e-06	Female
RGS1	-5.64864	2.96513e-08	1.08924e-06	Female
BDKRB2	-5.64456	3.03131e-08	1.11154e-06	Female
FCRL2	-5.64263	3.06299e-08	1.12112e-06	Female
MAP1A	-5.64104	3.08952e-08	1.12879e-06	Female
AOC3	-5.63391	3.21081e-08	1.16888e-06	Female
ALPK2	-5.61805	3.49732e-08	1.26545e-06	Female
ECSCR	-5.61786	3.50107e-08	1.26545e-06	Female
ITGBL1	-5.614	3.5745e-08	1.28511e-06	Female
TLR8	-5.61079	3.63672e-08	1.30516e-06	Female
C10orf54	-5.60839	3.68398e-08	1.31888e-06	Female
GPR65	-5.60183	3.81633e-08	1.35997e-06	Female
PLAC9	-5.6002	3.84981e-08	1.36949e-06	Female
ANGPTL2	-5.59946	3.8652e-08	1.37255e-06	Female
ERMN	-5.597	3.91656e-08	1.38835e-06	Female
ENTHD1	-5.59616	3.9343e-08	1.38978e-06	Female
IL10	-5.59648	3.92749e-08	1.38978e-06	Female
SLAMF1	-5.58845	4.10037e-08	1.4456e-06	Female
TGFB1I1	-5.58817	4.10662e-08	1.4456e-06	Female
HCST	-5.58696	4.13323e-08	1.45244e-06	Female
PI15	-5.58291	4.22412e-08	1.4816e-06	Female
RCSD1	-5.58257	4.23182e-08	1.4816e-06	Female
CST7	-5.58182	4.24881e-08	1.48276e-06	Female
MMP17	-5.5793	4.30654e-08	1.50032e-06	Female
CLEC4A	-5.57496	4.40782e-08	1.53034e-06	Female
WNT5B	-5.57192	4.47997e-08	1.55273e-06	Female
HGF	-5.56858	4.56081e-08	1.57804e-06	Female
MYH11	-5.56765	4.5836e-08	1.58322e-06	Female
BEST1	-5.56651	4.61168e-08	1.59021e-06	Female
CD1C	-5.56571	4.63127e-08	1.59424e-06	Female
GPX8	-5.56105	4.74813e-08	1.6317e-06	Female
C13orf33	-5.56022	4.76927e-08	1.63618e-06	Female
LRRC4	-5.55522	4.89833e-08	1.67478e-06	Female
CHST15	-5.55293	4.95845e-08	1.69248e-06	Female
SH3PXD2A	-5.54996	5.03758e-08	1.71659e-06	Female
OLFML2B	-5.54947	5.05068e-08	1.71816e-06	Female
FYB	-5.54355	5.21281e-08	1.76738e-06	Female
FAM43A	-5.5425	5.24205e-08	1.77432e-06	Female
RGMA	-5.54155	5.26866e-08	1.78035e-06	Female
SPEG	-5.54099	5.28429e-08	1.78266e-06	Female
PARVB	-5.54038	5.30142e-08	1.78546e-06	Female
PTPRC	-5.53981	5.31748e-08	1.78789e-06	Female
PTGIS	-5.53871	5.34875e-08	1.79542e-06	Female
FCGR1C	-5.53629	5.41815e-08	1.81571e-06	Female
SCN4B	-5.53558	5.43869e-08	1.81958e-06	Female
IFITM2	-5.53442	5.47248e-08	1.82786e-06	Female
JAK3	-5.52967	5.61243e-08	1.87152e-06	Female
MFNG	-5.52861	5.64415e-08	1.879e-06	Female
F2RL2	-5.52753	5.67669e-08	1.88673e-06	Female
CCR6	-5.52682	5.69807e-08	1.89073e-06	Female
IKZF1	-5.52537	5.74198e-08	1.90218e-06	Female
LCP2	-5.52392	5.78664e-08	1.90908e-06	Female
PROS1	-5.52377	5.7911e-08	1.90908e-06	Female
LILRA4	-5.51973	5.91687e-08	1.94737e-06	Female
LAPTM5	-5.51508	6.0645e-08	1.99272e-06	Female
LOX	-5.51469	6.07719e-08	1.99365e-06	Female
FCRL1	-5.5117	6.1742e-08	2.0222e-06	Female
LRRK2	-5.50946	6.24801e-08	2.04307e-06	Female
CD7	-5.50836	6.28443e-08	2.05167e-06	Female
SIGLEC7	-5.50739	6.31707e-08	2.059e-06	Female
ADAP2	-5.50567	6.3749e-08	2.07451e-06	Female
P2RY6	-5.50487	6.40202e-08	2.07999e-06	Female
PDE1A	-5.50155	6.5156e-08	2.1135e-06	Female
TNFRSF17	-5.50072	6.54407e-08	2.11833e-06	Female
GALNTL2	-5.50006	6.56699e-08	2.11998e-06	Female
LCN10	-5.49643	6.69463e-08	2.15774e-06	Female
IGFBP5	-5.49463	6.75843e-08	2.17484e-06	Female
SNAI1	-5.4943	6.77049e-08	2.17526e-06	Female
CMA1	-5.49276	6.82556e-08	2.18948e-06	Female
LY9	-5.4871	7.033e-08	2.25245e-06	Female
FAIM2	-5.48554	7.09114e-08	2.26748e-06	Female
KIF26A	-5.48364	7.16265e-08	2.28674e-06	Female
RGS18	-5.48097	7.2644e-08	2.31193e-06	Female
CD70	-5.47878	7.34879e-08	2.33512e-06	Female
ASB2	-5.47779	7.38731e-08	2.34367e-06	Female
C18orf26	-5.47734	7.40498e-08	2.3456e-06	Female
CREB3L1	-5.47215	7.61035e-08	2.40085e-06	Female
FLNC	-5.47216	7.60996e-08	2.40085e-06	Female
PRDM6	-5.47038	7.68165e-08	2.41811e-06	Female
ITGA4	-5.46757	7.79632e-08	2.45039e-06	Female
TNFAIP8L3	-5.46563	7.87635e-08	2.46788e-06	Female
FAM78A	-5.45824	8.18905e-08	2.55458e-06	Female
LOC100233209	-5.45872	8.16844e-08	2.55458e-06	Female
SIT1	-5.45819	8.19091e-08	2.55458e-06	Female
SNX20	-5.45461	8.34691e-08	2.59923e-06	Female
AHNAK2	-5.44131	8.95087e-08	2.78302e-06	Female
C7orf10	-5.44029	8.99895e-08	2.79368e-06	Female
PMP22	-5.43882	9.0687e-08	2.81102e-06	Female
JAM3	-5.4376	9.12655e-08	2.82462e-06	Female
DTX1	-5.43609	9.19943e-08	2.84283e-06	Female
DOCK10	-5.43338	9.3308e-08	2.87904e-06	Female
SIGLEC9	-5.43038	9.47887e-08	2.92027e-06	Female
CD1D	-5.42909	9.54312e-08	2.9356e-06	Female
ZEB1	-5.4287	9.56249e-08	2.93709e-06	Female
FAM129C	-5.42715	9.64055e-08	2.95658e-06	Female
AICDA	-5.42312	9.84592e-08	3.0059e-06	Female
ALDH1L2	-5.42327	9.83826e-08	3.0059e-06	Female
GPR97	-5.42354	9.82436e-08	3.0059e-06	Female
APCDD1L	-5.41969	1.00245e-07	3.05583e-06	Female
FLI1	-5.41854	1.00847e-07	3.06954e-06	Female
FXYD6	-5.41745	1.01425e-07	3.07328e-06	Female
LAYN	-5.41768	1.01304e-07	3.07328e-06	Female
MYLK	-5.41775	1.01266e-07	3.07328e-06	Female
SLC38A5	-5.40877	1.06132e-07	3.2111e-06	Female
TGFBI	-5.40763	1.06764e-07	3.2254e-06	Female
FGFR1	-5.40694	1.07152e-07	3.23228e-06	Female
ATP8B4	-5.40488	1.08309e-07	3.25747e-06	Female
SIGLEC1	-5.40404	1.08784e-07	3.26691e-06	Female
CLEC3B	-5.40148	1.10249e-07	3.30599e-06	Female
SNED1	-5.4003	1.10931e-07	3.32154e-06	Female
MGC45800	-5.39942	1.11441e-07	3.33188e-06	Female
GRAP	-5.39879	1.11807e-07	3.33789e-06	Female
LOC100129034	-5.39107	1.16399e-07	3.46985e-06	Female
GPR133	-5.38382	1.2087e-07	3.59784e-06	Female
SLAMF8	-5.38301	1.21384e-07	3.60782e-06	Female
CYTL1	-5.3825	1.21707e-07	3.61214e-06	Female
FLT3	-5.38193	1.2207e-07	3.61676e-06	Female
TMEM109	-5.38169	1.2222e-07	3.61676e-06	Female
P2RY13	-5.37542	1.26267e-07	3.73105e-06	Female
PLD4	-5.37478	1.26691e-07	3.73813e-06	Female
CHSY3	-5.37146	1.28892e-07	3.79754e-06	Female
HK3	-5.37068	1.2942e-07	3.80754e-06	Female
PPAPDC1A	-5.36359	1.34271e-07	3.94454e-06	Female
C21orf34	-5.36251	1.35021e-07	3.96082e-06	Female
FGL2	-5.36193	1.35429e-07	3.96702e-06	Female
BIN1	-5.361	1.36085e-07	3.97488e-06	Female
ELN	-5.35965	1.37038e-07	3.99105e-06	Female
LTA	-5.35554	1.39987e-07	4.07109e-06	Female
FLJ42709	-5.35489	1.40459e-07	4.07895e-06	Female
LBH	-5.35397	1.41133e-07	4.09267e-06	Female
PTPRN	-5.35364	1.41371e-07	4.0937e-06	Female
LOC96610	-5.35277	1.4201e-07	4.10633e-06	Female
IL34	-5.34868	1.45053e-07	4.18833e-06	Female
A2M	-5.34671	1.4654e-07	4.22525e-06	Female
LILRB5	-5.34173	1.50357e-07	4.32914e-06	Female
RGS10	-5.3384	1.52968e-07	4.39805e-06	Female
MT1M	-5.33803	1.53262e-07	4.40025e-06	Female
MAMLD1	-5.32462	1.64249e-07	4.70235e-06	Female
LILRB1	-5.32395	1.64815e-07	4.71189e-06	Female
EML3	-5.32285	1.65753e-07	4.73201e-06	Female
RGL4	-5.3207	1.67597e-07	4.77794e-06	Female
HLA-DOB	-5.319	1.69076e-07	4.79237e-06	Female
KCTD12	-5.31935	1.6877e-07	4.79237e-06	Female
PGM5	-5.31898	1.6909e-07	4.79237e-06	Female
CILP	-5.31637	1.71382e-07	4.83736e-06	Female
CLEC17A	-5.31613	1.71594e-07	4.83736e-06	Female
TCF4	-5.31535	1.72287e-07	4.85017e-06	Female
PDLIM7	-5.31118	1.76021e-07	4.94838e-06	Female
PIK3CD	-5.30917	1.77848e-07	4.99281e-06	Female
IGLON5	-5.30888	1.78119e-07	4.99351e-06	Female
ADAMTS4	-5.30405	1.82599e-07	5.09791e-06	Female
AOX1	-5.30356	1.83055e-07	5.10362e-06	Female
CREB5	-5.30274	1.8383e-07	5.11815e-06	Female
FAM124B	-5.29818	1.8819e-07	5.23235e-06	Female
CXCL13	-5.29753	1.88821e-07	5.24269e-06	Female
OSGIN1	-5.29672	1.89606e-07	5.25727e-06	Female
WISP2	-5.29178	1.9447e-07	5.38477e-06	Female
PDE4B	-5.29141	1.94843e-07	5.38772e-06	Female
DKFZp779M0652	-5.28933	1.96929e-07	5.43798e-06	Female
NLRP3	-5.28865	1.97615e-07	5.44948e-06	Female
SPSB1	-5.28811	1.98168e-07	5.45731e-06	Female
BMP1	-5.28666	1.9965e-07	5.48319e-06	Female
C22orf26	-5.28435	2.02019e-07	5.54075e-06	Female
EFEMP2	-5.2834	2.03006e-07	5.56028e-06	Female
PILRA	-5.28273	2.03711e-07	5.57203e-06	Female
GATA5	-5.28164	2.0485e-07	5.59564e-06	Female
ADAM19	-5.27921	2.07412e-07	5.65037e-06	Female
LTBP2	-5.27842	2.08252e-07	5.65236e-06	Female
MNDA	-5.27816	2.08535e-07	5.65236e-06	Female
NID2	-5.27836	2.08315e-07	5.65236e-06	Female
NINJ2	-5.27809	2.08602e-07	5.65236e-06	Female
RAMP3	-5.27669	2.10111e-07	5.68565e-06	Female
ANKRD55	-5.2741	2.12907e-07	5.75359e-06	Female
DPYSL3	-5.27159	2.15659e-07	5.81245e-06	Female
TMEM106A	-5.27183	2.15398e-07	5.81245e-06	Female
MYADM	-5.27096	2.16352e-07	5.82338e-06	Female
COL15A1	-5.27062	2.16732e-07	5.82586e-06	Female
KANK4	-5.26894	2.18606e-07	5.86067e-06	Female
VMO1	-5.26901	2.18528e-07	5.86067e-06	Female
CD3E	-5.26852	2.19075e-07	5.86547e-06	Female
C10orf26	-5.26225	2.26205e-07	6.03243e-06	Female
TOX2	-5.25758	2.31665e-07	6.1699e-06	Female
DOK3	-5.25235	2.37922e-07	6.32634e-06	Female
DLL1	-5.25108	2.39475e-07	6.35284e-06	Female
TSC22D3	-5.25006	2.40725e-07	6.37763e-06	Female
PKDCC	-5.24747	2.43919e-07	6.4538e-06	Female
TRPV2	-5.24653	2.45091e-07	6.47635e-06	Female
TCEAL7	-5.24372	2.48624e-07	6.56114e-06	Female
CLECL1	-5.24311	2.49399e-07	6.56449e-06	Female
EHD2	-5.24331	2.49145e-07	6.56449e-06	Female
MPP1	-5.2422	2.50556e-07	6.57783e-06	Female
ACOX2	-5.24087	2.52254e-07	6.60527e-06	Female
NTRK2	-5.24106	2.52015e-07	6.60527e-06	Female
TNFSF8	-5.2366	2.57798e-07	6.74172e-06	Female
TSPAN11	-5.23614	2.58401e-07	6.74878e-06	Female
KIAA1199	-5.23373	2.61591e-07	6.82327e-06	Female
NANS	-5.23111	2.65103e-07	6.90598e-06	Female
ZNF831	-5.22966	2.6706e-07	6.94801e-06	Female
A1BG	-5.22922	2.67658e-07	6.95465e-06	Female
EBF1	-5.22474	2.73821e-07	7.10567e-06	Female
GNG11	-5.2232	2.75957e-07	7.14278e-06	Female
SYT11	-5.22193	2.77753e-07	7.18008e-06	Female
C5orf46	-5.21867	2.82375e-07	7.28095e-06	Female
MSR1	-5.21556	2.86869e-07	7.37803e-06	Female
CD300C	-5.21443	2.88525e-07	7.4112e-06	Female
IL7R	-5.21338	2.90052e-07	7.44098e-06	Female
GFRA2	-5.21033	2.94571e-07	7.54735e-06	Female
F13A1	-5.20994	2.95159e-07	7.55286e-06	Female
INMT	-5.20894	2.96662e-07	7.58174e-06	Female
OAT	-5.20802	2.98043e-07	7.60741e-06	Female
KCNA6	-5.20502	3.026e-07	7.71402e-06	Female
C12orf54	-5.20453	3.03352e-07	7.72345e-06	Female
RAB37	-5.2038	3.04479e-07	7.74241e-06	Female
TSPAN4	-5.20219	3.06974e-07	7.79605e-06	Female
MATK	-5.20088	3.09004e-07	7.83778e-06	Female
C6orf114	-5.19737	3.14546e-07	7.96836e-06	Female
ADAMTS16	-5.196	3.16725e-07	8.00353e-06	Female
WNT2	-5.19601	3.16708e-07	8.00353e-06	Female
CRNN	-5.19488	3.18521e-07	8.03889e-06	Female
VAV1	-5.18344	3.37467e-07	8.49586e-06	Female
C21orf63	-5.18098	3.41686e-07	8.58074e-06	Female
HLA-DPB1	-5.17845	3.4607e-07	8.68005e-06	Female
FOXC2	-5.1721	3.57308e-07	8.93976e-06	Female
CLDN5	-5.16925	3.62488e-07	9.05816e-06	Female
PTHLH	-5.16701	3.66587e-07	9.14931e-06	Female
TNFRSF4	-5.16386	3.72438e-07	9.28388e-06	Female
CTLA4	-5.16228	3.75407e-07	9.34638e-06	Female
CEBPE	-5.15978	3.80157e-07	9.45303e-06	Female
NCAM1	-5.15874	3.82148e-07	9.49086e-06	Female
MXRA5	-5.15782	3.83933e-07	9.52351e-06	Female
NEK6	-5.15425	3.90876e-07	9.68208e-06	Female
SIGLEC8	-5.15404	3.91282e-07	9.68208e-06	Female
LOC145820	-5.1536	3.92147e-07	9.69163e-06	Female
PPM1F	-5.15023	3.98829e-07	9.84476e-06	Female
C19orf59	-5.14966	3.99972e-07	9.8496e-06	Female
TIGIT	-5.14965	3.99998e-07	9.8496e-06	Female
LEFTY2	-5.1475	4.04331e-07	9.94419e-06	Female
PLEKHO1	-5.14617	4.07042e-07	9.99872e-06	Female
AGTR1	-5.14393	4.11633e-07	1.00802e-05	Female
SCARA3	-5.14383	4.11855e-07	1.00802e-05	Female
MRO	-5.14181	4.16049e-07	1.01706e-05	Female
FCN1	-5.14079	4.18179e-07	1.02103e-05	Female
MSX1	-5.13784	4.24392e-07	1.03495e-05	Female
MAP1B	-5.13535	4.29726e-07	1.0467e-05	Female
ZYX	-5.13384	4.32983e-07	1.05337e-05	Female
LGALS2	-5.13359	4.33525e-07	1.05342e-05	Female
REM1	-5.13185	4.37315e-07	1.06135e-05	Female
COL10A1	-5.12955	4.42384e-07	1.07237e-05	Female
C2orf40	-5.1248	4.53005e-07	1.09549e-05	Female
TUBB6	-5.12216	4.59018e-07	1.10871e-05	Female
MAP4K1	-5.12186	4.59716e-07	1.10907e-05	Female
KCNA3	-5.12133	4.60933e-07	1.10936e-05	Female
PAPSS2	-5.11828	4.68012e-07	1.12506e-05	Female
LAMA2	-5.11424	4.7754e-07	1.14389e-05	Female
BDKRB1	-5.105	5.00054e-07	1.19641e-05	Female
C4orf7	-5.10407	5.02374e-07	1.20038e-05	Female
PLXNA4	-5.10386	5.02902e-07	1.20038e-05	Female
CLU	-5.10356	5.03641e-07	1.20073e-05	Female
GTSF1L	-5.10027	5.11973e-07	1.21773e-05	Female
POU2F2	-5.09742	5.1927e-07	1.23363e-05	Female
ACVRL1	-5.09641	5.21903e-07	1.23843e-05	Female
MMP14	-5.09493	5.2574e-07	1.24608e-05	Female
RSPO1	-5.09302	5.30772e-07	1.25653e-05	Female
HYAL1	-5.09227	5.32751e-07	1.25975e-05	Female
FCGR2C	-5.0915	5.34791e-07	1.26299e-05	Female
HEYL	-5.09128	5.3537e-07	1.26299e-05	Female
CXCR1	-5.08536	5.51366e-07	1.2977e-05	Female
NCRNA00173	-5.08536	5.51367e-07	1.2977e-05	Female
NAALADL1	-5.08012	5.65906e-07	1.32729e-05	Female
SNCA	-5.07758	5.73073e-07	1.34254e-05	Female
LCNL1	-5.07614	5.77168e-07	1.35057e-05	Female
TPM1	-5.07494	5.80633e-07	1.35711e-05	Female
ARHGAP22	-5.07378	5.83975e-07	1.36335e-05	Female
CNR2	-5.06954	5.96376e-07	1.3907e-05	Female
ITGAL	-5.06742	6.02678e-07	1.40249e-05	Female
SPOCK1	-5.06714	6.03511e-07	1.40249e-05	Female
SRF	-5.06725	6.03179e-07	1.40249e-05	Female
ELANE	-5.06635	6.05867e-07	1.40635e-05	Female
ANGPTL1	-5.06209	6.18776e-07	1.43303e-05	Female
C1QTNF1	-5.06049	6.23679e-07	1.4409e-05	Female
CD38	-5.06044	6.2386e-07	1.4409e-05	Female
RFX8	-5.05983	6.25744e-07	1.44256e-05	Female
P2RY10	-5.05857	6.29652e-07	1.44992e-05	Female
TMEM173	-5.05771	6.32333e-07	1.45444e-05	Female
LYL1	-5.05578	6.38399e-07	1.46672e-05	Female
KIAA0247	-5.05525	6.40051e-07	1.46885e-05	Female
GPR82	-5.05451	6.42408e-07	1.47259e-05	Female
ASPN	-5.05289	6.47564e-07	1.48273e-05	Female
ASGR2	-5.04903	6.60026e-07	1.50785e-05	Female
LSAMP	-5.04925	6.59327e-07	1.50785e-05	Female
NUDT11	-5.04565	6.71136e-07	1.53013e-05	Female
PGR	-5.0456	6.7129e-07	1.53013e-05	Female
CCL18	-5.04494	6.73504e-07	1.53345e-05	Female
EPHX1	-5.04401	6.76577e-07	1.53699e-05	Female
VNN2	-5.04285	6.80485e-07	1.5437e-05	Female
WISP1	-5.04268	6.81054e-07	1.5437e-05	Female
TMEM130	-5.04127	6.85791e-07	1.55096e-05	Female
GLIPR2	-5.04052	6.88328e-07	1.55496e-05	Female
ARID5A	-5.03918	6.9291e-07	1.56009e-05	Female
BFSP2	-5.03925	6.92672e-07	1.56009e-05	Female
MFGE8	-5.03945	6.91961e-07	1.56009e-05	Female
C15orf51	-5.03457	7.08818e-07	1.59236e-05	Female
RBMS3	-5.03082	7.22032e-07	1.61666e-05	Female
UBTD1	-5.02743	7.34175e-07	1.64204e-05	Female
TNS1	-5.02556	7.40939e-07	1.65534e-05	Female
SYNPO2	-5.02531	7.41873e-07	1.6556e-05	Female
CDO1	-5.01768	7.70223e-07	1.7132e-05	Female
LAX1	-5.0116	7.93552e-07	1.76122e-05	Female
CXCR3	-5.01123	7.94986e-07	1.76247e-05	Female
PMEPA1	-5.01059	7.97501e-07	1.76611e-05	Female
RASSF9	-5.00943	8.02051e-07	1.77424e-05	Female
STK17A	-5.0079	8.08105e-07	1.78568e-05	Female
MOXD1	-5.00654	8.13506e-07	1.79566e-05	Female
PTPRD	-5.00561	8.17206e-07	1.80186e-05	Female
WFDC3	-5.00444	8.21927e-07	1.8103e-05	Female
ITK	-5.00251	8.29729e-07	1.82549e-05	Female
P2RY14	-5.0017	8.33027e-07	1.83076e-05	Female
EGR2	-4.99986	8.40577e-07	1.84535e-05	Female
ARSJ	-4.99391	8.65416e-07	1.89372e-05	Female
C8orf80	-4.99399	8.65086e-07	1.89372e-05	Female
F10	-4.99329	8.68021e-07	1.89532e-05	Female
CDK6	-4.99248	8.71493e-07	1.90085e-05	Female
IL6	-4.99171	8.74766e-07	1.90594e-05	Female
PIM2	-4.98964	8.83679e-07	1.92329e-05	Female
RECK	-4.98936	8.8486e-07	1.92379e-05	Female
MKX	-4.98825	8.89692e-07	1.93222e-05	Female
ATP10A	-4.9876	8.92543e-07	1.93633e-05	Female
GRAP2	-4.98712	8.94634e-07	1.93879e-05	Female
FPR3	-4.98681	8.95995e-07	1.93966e-05	Female
NCRNA00181	-4.98608	8.99193e-07	1.9445e-05	Female
NECAB2	-4.98574	9.00697e-07	1.94568e-05	Female
CD2	-4.98506	9.03695e-07	1.94597e-05	Female
TIMD4	-4.98505	9.03716e-07	1.94597e-05	Female
TNFSF4	-4.98521	9.03019e-07	1.94597e-05	Female
GADD45B	-4.97787	9.35973e-07	2.01172e-05	Female
HSD17B6	-4.97718	9.39103e-07	2.01573e-05	Female
S1PR4	-4.97622	9.43545e-07	2.02313e-05	Female
ITGAM	-4.97478	9.50193e-07	2.03522e-05	Female
MEF2C	-4.97244	9.61069e-07	2.05634e-05	Female
C20orf200	-4.97219	9.62268e-07	2.05673e-05	Female
CHPF	-4.97082	9.68708e-07	2.06831e-05	Female
BCAT1	-4.96957	9.74605e-07	2.07871e-05	Female
FAM167A	-4.96744	9.84785e-07	2.09601e-05	Female
ARHGAP15	-4.96512	9.95981e-07	2.11539e-05	Female
PRDM1	-4.96532	9.95002e-07	2.11539e-05	Female
C14orf139	-4.96462	9.98415e-07	2.11834e-05	Female
POLD4	-4.96234	1.00954e-06	2.13384e-05	Female
TFEC	-4.96205	1.01099e-06	2.13384e-05	Female
TTYH2	-4.96223	1.01008e-06	2.13384e-05	Female
GNG2	-4.96162	1.01308e-06	2.13602e-05	Female
IGDCC4	-4.96133	1.01451e-06	2.13681e-05	Female
FN1	-4.95797	1.03126e-06	2.16756e-05	Female
PIK3AP1	-4.95817	1.03024e-06	2.16756e-05	Female
PRAM1	-4.9575	1.03359e-06	2.17021e-05	Female
GSN	-4.95425	1.05007e-06	2.20026e-05	Female
DCLK1	-4.95364	1.05317e-06	2.20447e-05	Female
FOXF1	-4.95206	1.06133e-06	2.21925e-05	Female
IGJ	-4.95059	1.0689e-06	2.23046e-05	Female
MIR155HG	-4.9494	1.07509e-06	2.24107e-05	Female
ADAMTS6	-4.94593	1.09335e-06	2.27681e-05	Female
NAV3	-4.94446	1.10118e-06	2.29076e-05	Female
FLNA	-4.94383	1.10455e-06	2.29541e-05	Female
ERG	-4.94356	1.10604e-06	2.29614e-05	Female
RASL12	-4.94277	1.11027e-06	2.30255e-05	Female
C15orf59	-4.94163	1.11643e-06	2.31297e-05	Female
MEOX1	-4.93947	1.12818e-06	2.33492e-05	Female
ADAM23	-4.93905	1.1305e-06	2.33495e-05	Female
SCN3B	-4.9392	1.12968e-06	2.33495e-05	Female
ANKRD29	-4.93867	1.13259e-06	2.33687e-05	Female
SLC11A1	-4.93522	1.15168e-06	2.37385e-05	Female
NLRC4	-4.93182	1.17082e-06	2.40839e-05	Female
LAMA4	-4.92894	1.18723e-06	2.43966e-05	Female
CYP27A1	-4.9274	1.19612e-06	2.45313e-05	Female
FMO2	-4.92738	1.1962e-06	2.45313e-05	Female
BHMT2	-4.92377	1.21732e-06	2.49096e-05	Female
BICD2	-4.92379	1.21718e-06	2.49096e-05	Female
ITGA7	-4.92359	1.21834e-06	2.49096e-05	Female
COL12A1	-4.92088	1.23441e-06	2.52126e-05	Female
CD1B	-4.91784	1.2527e-06	2.55346e-05	Female
STMN3	-4.91511	1.26936e-06	2.58481e-05	Female
PPP1R16B	-4.91141	1.29222e-06	2.62873e-05	Female
LZTS1	-4.90425	1.33763e-06	2.71565e-05	Female
ADH1B	-4.90373	1.34094e-06	2.71964e-05	Female
STK40	-4.90163	1.35463e-06	2.74191e-05	Female
VCAM1	-4.89989	1.36603e-06	2.76223e-05	Female
CLEC4G	-4.89702	1.38503e-06	2.79765e-05	Female
VASN	-4.89683	1.38631e-06	2.79765e-05	Female
FST	-4.89557	1.39472e-06	2.81181e-05	Female
HSPA12A	-4.89505	1.39825e-06	2.81612e-05	Female
SLC7A5	-4.89028	1.43067e-06	2.8757e-05	Female
CELF2	-4.88842	1.44352e-06	2.89768e-05	Female
MSN	-4.88828	1.44447e-06	2.89768e-05	Female
CAV1	-4.8869	1.45409e-06	2.90583e-05	Female
IL17B	-4.88704	1.45316e-06	2.90583e-05	Female
LOC100188949	-4.88688	1.45428e-06	2.90583e-05	Female
MT2A	-4.88509	1.46679e-06	2.92506e-05	Female
FKBP10	-4.88336	1.47906e-06	2.94662e-05	Female
RNF212	-4.88187	1.48971e-06	2.96492e-05	Female
MMP25	-4.88141	1.49297e-06	2.96848e-05	Female
FFAR3	-4.8812	1.49449e-06	2.9686e-05	Female
TOM1	-4.87896	1.51066e-06	2.99778e-05	Female
TPST2	-4.87564	1.53489e-06	3.04287e-05	Female
ICOS	-4.87483	1.54091e-06	3.04883e-05	Female
KIF26B	-4.87494	1.54007e-06	3.04883e-05	Female
FBXO17	-4.87239	1.55899e-06	3.08158e-05	Female
RBM24	-4.86974	1.57893e-06	3.11796e-05	Female
SH2D1A	-4.86935	1.58189e-06	3.12075e-05	Female
KIAA1274	-4.86523	1.61345e-06	3.17682e-05	Female
KLRB1	-4.8626	1.63385e-06	3.21388e-05	Female
PDZRN4	-4.86169	1.64103e-06	3.22487e-05	Female
TMC8	-4.86025	1.65235e-06	3.24396e-05	Female
PDCD1	-4.85138	1.72394e-06	3.37796e-05	Female
FAM92B	-4.85044	1.73167e-06	3.38983e-05	Female
CLEC2B	-4.84844	1.74829e-06	3.41904e-05	Female
CNTNAP1	-4.84779	1.75378e-06	3.42647e-05	Female
BAG2	-4.84692	1.76103e-06	3.43401e-05	Female
TSHZ3	-4.84699	1.76048e-06	3.43401e-05	Female
NCRNA00152	-4.84655	1.76416e-06	3.4368e-05	Female
THBD	-4.84594	1.76932e-06	3.44354e-05	Female
KCNAB2	-4.84399	1.78581e-06	3.47229e-05	Female
CNN2	-4.84298	1.79449e-06	3.47914e-05	Female
FGF14	-4.84314	1.79313e-06	3.47914e-05	Female
PLEKHA4	-4.84234	1.79997e-06	3.48642e-05	Female
GNB4	-4.83879	1.8307e-06	3.54257e-05	Female
HTR2B	-4.83831	1.83488e-06	3.54727e-05	Female
C7	-4.83653	1.85051e-06	3.57065e-05	Female
FZD8	-4.83508	1.86333e-06	3.59197e-05	Female
C10orf128	-4.83368	1.87585e-06	3.61265e-05	Female
MUSTN1	-4.83022	1.907e-06	3.66568e-05	Female
FAM101B	-4.82982	1.91064e-06	3.66919e-05	Female
FGF1	-4.8281	1.9263e-06	3.69576e-05	Female
CR2	-4.82723	1.93434e-06	3.70766e-05	Female
NGFR	-4.8247	1.95774e-06	3.74897e-05	Female
GPR55	-4.8237	1.96704e-06	3.75967e-05	Female
NXN	-4.8229	1.97451e-06	3.77038e-05	Female
JAM2	-4.82104	1.99204e-06	3.80028e-05	Female
GLIS2	-4.82009	2.00109e-06	3.81393e-05	Female
ACP5	-4.81733	2.02752e-06	3.86069e-05	Female
ADCYAP1	-4.81697	2.03099e-06	3.86365e-05	Female
DAPK3	-4.81473	2.05266e-06	3.90121e-05	Female
CCL23	-4.8131	2.06862e-06	3.92785e-05	Female
CEACAM21	-4.81117	2.08769e-06	3.95668e-05	Female
PI16	-4.81117	2.08771e-06	3.95668e-05	Female
GFOD1	-4.81052	2.09414e-06	3.96515e-05	Female
FSTL3	-4.80916	2.10773e-06	3.98716e-05	Female
GYPE	-4.80658	2.13366e-06	4.03244e-05	Female
PRF1	-4.80471	2.15264e-06	4.06451e-05	Female
P2RY8	-4.80415	2.15836e-06	4.06772e-05	Female
DPYSL2	-4.80351	2.16492e-06	4.07629e-05	Female
ELL2	-4.80259	2.17436e-06	4.09027e-05	Female
LILRA6	-4.80116	2.18913e-06	4.11422e-05	Female
IFFO2	-4.7971	2.23166e-06	4.18639e-05	Female
CSF3	-4.79599	2.2434e-06	4.20062e-05	Female
RASGRF2	-4.79618	2.24135e-06	4.20062e-05	Female
PDGFA	-4.79519	2.25186e-06	4.21256e-05	Female
CYGB	-4.79447	2.25957e-06	4.22308e-05	Female
GPNMB	-4.79421	2.2624e-06	4.22446e-05	Female
BTBD11	-4.79352	2.26972e-06	4.23424e-05	Female
SLC17A9	-4.79286	2.27691e-06	4.23982e-05	Female
TCF21	-4.79305	2.27482e-06	4.23982e-05	Female
SORCS1	-4.78827	2.32682e-06	4.32481e-05	Female
CD3D	-4.78271	2.38873e-06	4.4358e-05	Female
GJA4	-4.78113	2.40664e-06	4.46087e-05	Female
GIMAP5	-4.77905	2.43034e-06	4.50069e-05	Female
DENND3	-4.77865	2.4349e-06	4.50501e-05	Female
SERPINA3	-4.77703	2.45364e-06	4.53554e-05	Female
CCL2	-4.77666	2.45793e-06	4.53932e-05	Female
XPNPEP2	-4.77606	2.4649e-06	4.54804e-05	Female
DIRC1	-4.77058	2.52936e-06	4.66273e-05	Female
STON1	-4.76869	2.55197e-06	4.69586e-05	Female
FPR2	-4.76708	2.57149e-06	4.72374e-05	Female
UBASH3A	-4.76705	2.57179e-06	4.72374e-05	Female
SLC47A1	-4.76377	2.61188e-06	4.79302e-05	Female
CCR5	-4.76289	2.62264e-06	4.80842e-05	Female
FCGR3A	-4.76116	2.6441e-06	4.84337e-05	Female
IFITM3	-4.76046	2.65281e-06	4.85493e-05	Female
SOX8	-4.75954	2.66434e-06	4.87162e-05	Female
TSPAN7	-4.7549	2.72304e-06	4.96997e-05	Female
BACH2	-4.75153	2.76654e-06	5.03575e-05	Female
CCDC3	-4.74846	2.80669e-06	5.09051e-05	Female
IGSF21	-4.74869	2.80371e-06	5.09051e-05	Female
SOX10	-4.74861	2.80474e-06	5.09051e-05	Female
PDGFC	-4.7474	2.82067e-06	5.11129e-05	Female
LRRC17	-4.74649	2.83277e-06	5.12405e-05	Female
NAMPT	-4.74526	2.8492e-06	5.14917e-05	Female
SEMA3A	-4.74403	2.86558e-06	5.17416e-05	Female
LYZ	-4.74308	2.87847e-06	5.1928e-05	Female
SMAP2	-4.7409	2.90794e-06	5.23661e-05	Female
IGSF6	-4.74015	2.9182e-06	5.249e-05	Female
RNF112	-4.74002	2.92e-06	5.249e-05	Female
KCNN3	-4.73724	2.95833e-06	5.31319e-05	Female
LRIG1	-4.73678	2.96469e-06	5.31989e-05	Female
CCR2	-4.73589	2.97707e-06	5.33737e-05	Female
ARRDC5	-4.73534	2.98478e-06	5.34645e-05	Female
SPN	-4.73514	2.98752e-06	5.34663e-05	Female
CD84	-4.73298	3.01794e-06	5.39419e-05	Female
LILRA1	-4.73287	3.01942e-06	5.39419e-05	Female
KCNJ12	-4.73209	3.03057e-06	5.40933e-05	Female
ADRA1D	-4.73187	3.03357e-06	5.40991e-05	Female
ADCY4	-4.73165	3.03669e-06	5.41071e-05	Female
CCL3	-4.72881	3.0774e-06	5.47842e-05	Female
LOC284749	-4.72738	3.098e-06	5.51025e-05	Female
C3	-4.72692	3.10474e-06	5.51738e-05	Female
CD247	-4.72662	3.10911e-06	5.52031e-05	Female
RAB33A	-4.72426	3.14351e-06	5.5765e-05	Female
NAP1L3	-4.72318	3.15949e-06	5.59503e-05	Female
SSR3	-4.72154	3.1837e-06	5.63298e-05	Female
GHR	-4.72088	3.19354e-06	5.64546e-05	Female
HAR1A	-4.71919	3.21894e-06	5.68539e-05	Female
ST3GAL6	-4.7174	3.24589e-06	5.72799e-05	Female
ELMO1	-4.71712	3.25017e-06	5.73054e-05	Female
DDR2	-4.71571	3.27167e-06	5.75843e-05	Female
UBE2QL1	-4.71118	3.34157e-06	5.87635e-05	Female
FGD2	-4.71074	3.34834e-06	5.88314e-05	Female
SOST	-4.70799	3.3915e-06	5.95184e-05	Female
VAMP5	-4.70788	3.39332e-06	5.95184e-05	Female
CFI	-4.70757	3.39813e-06	5.95512e-05	Female
RNF19B	-4.70234	3.48194e-06	6.09145e-05	Female
TLR1	-4.7019	3.48913e-06	6.09875e-05	Female
CCR1	-4.70146	3.49639e-06	6.10616e-05	Female
GZMM	-4.70011	3.51828e-06	6.1391e-05	Female
EYA1	-4.6983	3.54817e-06	6.18592e-05	Female
ASAM	-4.69624	3.58221e-06	6.23989e-05	Female
TBC1D2	-4.69523	3.59915e-06	6.264e-05	Female
JPH2	-4.6925	3.64509e-06	6.33852e-05	Female
HPSE2	-4.68642	3.74948e-06	6.51444e-05	Female
TBC1D22A	-4.68613	3.75467e-06	6.51785e-05	Female
CERCAM	-4.6839	3.79363e-06	6.57985e-05	Female
TMEM200A	-4.68167	3.83319e-06	6.62576e-05	Female
FMO1	-4.67871	3.88614e-06	6.71155e-05	Female
ARID5B	-4.6779	3.90075e-06	6.73103e-05	Female
LASS4	-4.67472	3.95865e-06	6.81702e-05	Female
STAR	-4.67461	3.96068e-06	6.81702e-05	Female
ZBTB32	-4.6724	4.00132e-06	6.88111e-05	Female
DKK2	-4.66985	4.04902e-06	6.95134e-05	Female
HLX	-4.66966	4.05255e-06	6.9515e-05	Female
KLF9	-4.66943	4.0569e-06	6.95307e-05	Female
GHRL	-4.66747	4.09384e-06	7.01045e-05	Female
PLXDC2	-4.66533	4.13461e-06	7.07428e-05	Female
LIX1L	-4.6645	4.15042e-06	7.09533e-05	Female
SYNM	-4.66418	4.15654e-06	7.0998e-05	Female
DUSP5	-4.66357	4.16834e-06	7.10795e-05	Female
ENTPD1	-4.66375	4.16491e-06	7.10795e-05	Female
PECAM1	-4.66288	4.18163e-06	7.1246e-05	Female
STK17B	-4.66232	4.19241e-06	7.13697e-05	Female
FHL1	-4.66004	4.23688e-06	7.19452e-05	Female
S1PR1	-4.65849	4.2673e-06	7.2401e-05	Female
WNT2B	-4.6578	4.28102e-06	7.25122e-05	Female
INHBA	-4.65705	4.29583e-06	7.27023e-05	Female
STARD13	-4.65451	4.34659e-06	7.34385e-05	Female
TNFSF9	-4.65155	4.40626e-06	7.43846e-05	Female
CD1E	-4.65114	4.4146e-06	7.44419e-05	Female
TNFSF13B	-4.65102	4.41701e-06	7.44419e-05	Female
A4GALT	-4.64789	4.48139e-06	7.52851e-05	Female
ANTXR1	-4.64788	4.4816e-06	7.52851e-05	Female
CISD1	-4.64786	4.48192e-06	7.52851e-05	Female
PTGER3	-4.64793	4.48051e-06	7.52851e-05	Female
FAM70A	-4.64531	4.53495e-06	7.61127e-05	Female
SIAH2	-4.64309	4.58153e-06	7.68308e-05	Female
DHRS9	-4.64216	4.60123e-06	7.70973e-05	Female
KCNMA1	-4.63739	4.70351e-06	7.86807e-05	Female
CPNE8	-4.63697	4.71261e-06	7.8768e-05	Female
CCL22	-4.6363	4.7272e-06	7.88842e-05	Female
RCVRN	-4.63629	4.72736e-06	7.88842e-05	Female
CXCR7	-4.63252	4.8101e-06	8.01328e-05	Female
PDCD1LG2	-4.63233	4.81427e-06	8.01363e-05	Female
CCDC85B	-4.63173	4.82752e-06	8.02907e-05	Female
GIMAP4	-4.63029	4.8597e-06	8.07595e-05	Female
FTH1	-4.62989	4.86851e-06	8.08396e-05	Female
COL11A1	-4.62948	4.87762e-06	8.09246e-05	Female
GPC1	-4.62815	4.90751e-06	8.13537e-05	Female
HAPLN3	-4.62627	4.9503e-06	8.19959e-05	Female
TAGAP	-4.62485	4.98266e-06	8.24645e-05	Female
TXLNB	-4.62357	5.01194e-06	8.28651e-05	Female
FCN3	-4.61396	5.23784e-06	8.64756e-05	Female
CETP	-4.61246	5.27387e-06	8.69995e-05	Female
FGF2	-4.60936	5.34947e-06	8.81031e-05	Female
KAL1	-4.60713	5.4042e-06	8.89321e-05	Female
DHH	-4.60394	5.48368e-06	9.01667e-05	Female
GUCY1A3	-4.60204	5.53179e-06	9.08839e-05	Female
TPRG1	-4.59866	5.61789e-06	9.22236e-05	Female
RNASE2	-4.59762	5.64447e-06	9.25849e-05	Female
STAT4	-4.59676	5.66677e-06	9.28754e-05	Female
PAPPA	-4.59393	5.74048e-06	9.40074e-05	Female
GRP	-4.59318	5.76016e-06	9.42533e-05	Female
CLIP3	-4.59224	5.78514e-06	9.45498e-05	Female
LGALS1	-4.59214	5.78762e-06	9.45498e-05	Female
ST6GALNAC6	-4.5906	5.82842e-06	9.51396e-05	Female
ADCY2	-4.58926	5.86419e-06	9.55693e-05	Female
THPO	-4.58942	5.85998e-06	9.55693e-05	Female
CLEC4D	-4.58404	6.0055e-06	9.77934e-05	Female
ITIH3	-4.57654	6.2144e-06	0.000101033	Female
KLHL13	-4.5761	6.22669e-06	0.000101151	Female
CAV2	-4.57556	6.24195e-06	0.000101318	Female
HOPX	-4.57242	6.33193e-06	0.000102614	Female
CD80	-4.56785	6.465e-06	0.000104603	Female
DIO3	-4.56611	6.51623e-06	0.000105348	Female
EYA4	-4.56533	6.53939e-06	0.000105553	Female
PDLIM4	-4.56244	6.6258e-06	0.000106863	Female
IGFBP7	-4.56152	6.65357e-06	0.000107225	Female
ATP6V0D1	-4.56068	6.67893e-06	0.000107548	Female
SOBP	-4.55928	6.72149e-06	0.000108148	Female
GPR155	-4.55874	6.73814e-06	0.000108329	Female
LCN6	-4.55832	6.75076e-06	0.000108446	Female
RGS13	-4.55602	6.82175e-06	0.000109413	Female
SEPT1	-4.55509	6.85047e-06	0.000109786	Female
LY6H	-4.55356	6.89807e-06	0.000110311	Female
RASA3	-4.55352	6.89956e-06	0.000110311	Female
RGS9	-4.55379	6.89102e-06	0.000110311	Female
ZBED2	-4.55223	6.94003e-06	0.000110871	Female
TM6SF2	-4.54813	7.06992e-06	0.000112679	Female
RGS4	-4.54673	7.11488e-06	0.000113306	Female
SEMA6B	-4.54589	7.142e-06	0.000113649	Female
ICAM3	-4.5433	7.22619e-06	0.000114898	Female
NOX4	-4.54235	7.25738e-06	0.000115303	Female
FAM70B	-4.54097	7.30283e-06	0.000115935	Female
PRUNE2	-4.54071	7.31136e-06	0.000115979	Female
TOMM7	-4.53778	7.40895e-06	0.000117251	Female
CHST12	-4.53727	7.42617e-06	0.00011734	Female
DBNL	-4.53737	7.42279e-06	0.00011734	Female
CLEC9A	-4.53605	7.46726e-06	0.000117898	Female
AKR1C1	-4.53562	7.4818e-06	0.000118035	Female
ANPEP	-4.53111	7.63566e-06	0.000120181	Female
XIRP1	-4.53063	7.65234e-06	0.000120351	Female
NRXN2	-4.52787	7.7481e-06	0.000121762	Female
OLFML2A	-4.52071	8.00233e-06	0.000125465	Female
NFIL3	-4.52048	8.01064e-06	0.000125498	Female
GZMB	-4.51882	8.07096e-06	0.000126345	Female
FSTL1	-4.51767	8.11282e-06	0.000126902	Female
TIE1	-4.51676	8.14612e-06	0.000127227	Female
PRR5L	-4.51337	8.27128e-06	0.000129082	Female
HHIPL1	-4.51309	8.28194e-06	0.000129148	Female
GMPPA	-4.51215	8.31698e-06	0.000129529	Female
HMHA1	-4.51209	8.31912e-06	0.000129529	Female
CSMD2	-4.51167	8.3349e-06	0.000129675	Female
FLJ40330	-4.51056	8.37667e-06	0.000130025	Female
ZAP70	-4.51075	8.36935e-06	0.000130025	Female
FAM43B	-4.50971	8.40891e-06	0.000130425	Female
TMEM100	-4.50917	8.42937e-06	0.000130642	Female
PLCB2	-4.50877	8.44455e-06	0.000130777	Female
PTPN22	-4.50752	8.49188e-06	0.00013131	Female
TMEM149	-4.50658	8.52777e-06	0.000131764	Female
MS4A14	-4.50269	8.67826e-06	0.000133987	Female
ADAMTSL1	-4.49944	8.80593e-06	0.000135854	Female
SLC1A4	-4.49859	8.8394e-06	0.000136267	Female
PRSS35	-4.49655	8.92073e-06	0.000137416	Female
FAM198B	-4.49617	8.93602e-06	0.000137547	Female
PTPRZ1	-4.49493	8.98592e-06	0.00013821	Female
NPAS4	-4.49348	9.04449e-06	0.000138899	Female
LEF1	-4.49327	9.05288e-06	0.000138923	Female
SYDE1	-4.49299	9.06425e-06	0.000138992	Female
KIAA0922	-4.49146	9.12701e-06	0.000139848	Female
SH2D3C	-4.49095	9.14768e-06	0.000140059	Female
BMP6	-4.48628	9.34125e-06	0.000142807	Female
MYH8	-4.48497	9.39615e-06	0.000143538	Female
ADAMTS12	-4.48127	9.55315e-06	0.000145716	Female
DUSP26	-4.47986	9.61337e-06	0.000146395	Female
CLIC2	-4.47908	9.64722e-06	0.000146709	Female
RBP1	-4.47654	9.7572e-06	0.000148159	Female
CSF2RA	-4.47625	9.76973e-06	0.000148238	Female
SYNPO	-4.47479	9.83399e-06	0.000148878	Female
CD4	-4.46911	1.00866e-05	0.000152474	Female
PPP1R14A	-4.46881	1.00999e-05	0.000152561	Female
NTN1	-4.46737	1.01649e-05	0.000153429	Female
MEI1	-4.46435	1.03032e-05	0.000155285	Female
SFTA1P	-4.46256	1.03856e-05	0.00015641	Female
GEFT	-4.45977	1.05157e-05	0.000158251	Female
CNTN1	-4.45955	1.05261e-05	0.00015829	Female
SCN2B	-4.45854	1.05732e-05	0.00015888	Female
HAS2	-4.45758	1.06184e-05	0.000159393	Female
F3	-4.45628	1.06805e-05	0.000160095	Female
RGS22	-4.45447	1.07666e-05	0.000161188	Female
SDPR	-4.45383	1.07975e-05	0.000161531	Female
IL2RG	-4.45119	1.09249e-05	0.000163317	Female
IL33	-4.45001	1.09826e-05	0.000164058	Female
LOC201651	-4.44952	1.10067e-05	0.000164147	Female
TTC7A	-4.44939	1.10129e-05	0.000164147	Female
FTHL3	-4.44818	1.10725e-05	0.000164793	Female
GPR171	-4.44666	1.11476e-05	0.000165789	Female
CCR7	-4.44605	1.11778e-05	0.000166116	Female
NTRK1	-4.44406	1.12767e-05	0.000167381	Female
CCR4	-4.44326	1.13169e-05	0.000167695	Female
ICOSLG	-4.44326	1.13172e-05	0.000167695	Female
IL18RAP	-4.44288	1.13363e-05	0.000167855	Female
SLC2A3	-4.44117	1.14227e-05	0.00016901	Female
IDO2	-4.44084	1.14396e-05	0.000169137	Female
TMEM121	-4.43952	1.15066e-05	0.00016988	Female
NTRK3	-4.43906	1.15302e-05	0.000170105	Female
PCDHGC3	-4.43666	1.16536e-05	0.0001718	Female
CD93	-4.43627	1.16739e-05	0.000171974	Female
CD200R1	-4.43603	1.16861e-05	0.000172028	Female
POPDC2	-4.43526	1.17264e-05	0.000172496	Female
FCRL4	-4.4342	1.17817e-05	0.000173183	Female
RERGL	-4.43306	1.1841e-05	0.000173929	Female
KCNG2	-4.43136	1.19306e-05	0.000175117	Female
IFI30	-4.4288	1.2067e-05	0.000176735	Female
LRRN4CL	-4.42881	1.20661e-05	0.000176735	Female
CORIN	-4.42549	1.22451e-05	0.000179213	Female
KCNQ5	-4.42505	1.22688e-05	0.000179431	Female
SCG2	-4.42445	1.23017e-05	0.000179782	Female
HLA-DRB6	-4.42271	1.23966e-05	0.000181039	Female
PDE2A	-4.42238	1.24148e-05	0.000181174	Female
FKBP11	-4.42201	1.24353e-05	0.000181342	Female
GALNTL4	-4.42123	1.24782e-05	0.000181837	Female
SCHIP1	-4.42103	1.2489e-05	0.000181863	Female
LYNX1	-4.42013	1.25393e-05	0.000182465	Female
TNXB	-4.41571	1.27864e-05	0.000185926	Female
TPSG1	-4.4139	1.28893e-05	0.000186992	Female
TRPS1	-4.41377	1.28967e-05	0.000186992	Female
CD40LG	-4.4133	1.29234e-05	0.000187204	Female
FAM69A	-4.41319	1.29298e-05	0.000187204	Female
CRYBB1	-4.4119	1.30035e-05	0.000188138	Female
PLS3	-4.40999	1.3114e-05	0.000189466	Female
RASSF4	-4.40624	1.33329e-05	0.000192216	Female
TRPC6	-4.40583	1.3357e-05	0.000192426	Female
CLEC5A	-4.40537	1.33839e-05	0.000192676	Female
PCSK1	-4.40481	1.34171e-05	0.000192934	Female
C11orf24	-4.4007	1.36623e-05	0.000195848	Female
C8orf85	-4.39985	1.37136e-05	0.000196368	Female
CAPZB	-4.39254	1.41622e-05	0.000202157	Female
C9orf21	-4.39213	1.41875e-05	0.000202304	Female
NR4A3	-4.39205	1.41926e-05	0.000202304	Female
PLA2G2A	-4.38946	1.43552e-05	0.000204478	Female
ADH7	-4.38926	1.43681e-05	0.000204518	Female
NID1	-4.38904	1.43817e-05	0.000204568	Female
CXCR6	-4.38879	1.43978e-05	0.000204653	Female
CPVL	-4.38658	1.45382e-05	0.000206214	Female
LTBP1	-4.38671	1.453e-05	0.000206214	Female
TALDO1	-4.3857	1.45945e-05	0.000206867	Female
SOD2	-4.38183	1.48452e-05	0.000210274	Female
NRARP	-4.37475	1.53136e-05	0.000216315	Female
THSD1	-4.37398	1.53649e-05	0.000216877	Female
PPM1J	-4.37267	1.54538e-05	0.000217828	Female
ZCCHC5	-4.36991	1.5642e-05	0.000220327	Female
TIFAB	-4.36878	1.57194e-05	0.000221263	Female
DOCK11	-4.36768	1.57951e-05	0.000222175	Female
MYOCD	-4.36586	1.5922e-05	0.000223803	Female
SPARCL1	-4.36505	1.5978e-05	0.000224435	Female
PTCRA	-4.36225	1.61751e-05	0.000226888	Female
ASPG	-4.36148	1.62299e-05	0.000227499	Female
CCND2	-4.36021	1.63201e-05	0.000228606	Female
PRND	-4.35831	1.64565e-05	0.000230201	Female
PCP4	-4.35247	1.68819e-05	0.0002352	Female
TRPC4	-4.35225	1.68978e-05	0.0002352	Female
ASB5	-4.35195	1.69199e-05	0.000235217	Female
RORB	-4.35054	1.70248e-05	0.000236512	Female
GUCA1A	-4.35012	1.7056e-05	0.000236783	Female
RPLP0P2	-4.34818	1.72007e-05	0.000238629	Female
FOXL1	-4.34663	1.73177e-05	0.000240087	Female
IL32	-4.34598	1.73671e-05	0.000240607	Female
GRID1	-4.34307	1.75884e-05	0.000243223	Female
IGFBP6	-4.34303	1.75919e-05	0.000243223	Female
GBP6	-4.34034	1.77992e-05	0.000245794	Female
PLTP	-4.34014	1.78144e-05	0.000245794	Female
TIMP1	-4.34028	1.7804e-05	0.000245794	Female
IRAK3	-4.3392	1.78881e-05	0.000246475	Female
ECE1	-4.33843	1.79475e-05	0.000247127	Female
CCDC102A	-4.33761	1.80125e-05	0.000247852	Female
CACNA1H	-4.3368	1.80758e-05	0.000248554	Female
IL1F6	-4.33435	1.82696e-05	0.000251049	Female
SNTG2	-4.33361	1.83288e-05	0.000251691	Female
LRFN5	-4.33319	1.83619e-05	0.000251975	Female
LOC401093	-4.33133	1.8511e-05	0.00025385	Female
GPBAR1	-4.33082	1.8552e-05	0.000254039	Female
NUDT10	-4.33069	1.85625e-05	0.000254039	Female
TDRD10	-4.32852	1.87391e-05	0.000256109	Female
UAP1L1	-4.32789	1.87898e-05	0.000256629	Female
CBR1	-4.32736	1.88336e-05	0.000257053	Female
RIN3	-4.327	1.88627e-05	0.000257104	Female
GJA5	-4.323	1.91937e-05	0.000261089	Female
ARHGAP20	-4.32272	1.92171e-05	0.000261232	Female
PYHIN1	-4.32025	1.94245e-05	0.000263874	Female
HDLBP	-4.31558	1.98222e-05	0.000268734	Female
PLA2G4C	-4.31514	1.986e-05	0.000269067	Female
GLT1D1	-4.31489	1.98814e-05	0.000269176	Female
ST3GAL2	-4.31398	1.99597e-05	0.000270016	Female
C6orf176	-4.31267	2.00731e-05	0.000271047	Female
SRL	-4.31086	2.02311e-05	0.000272999	Female
PARP15	-4.30964	2.03388e-05	0.000274086	Female
RCBTB2	-4.30912	2.03842e-05	0.000274515	Female
LOXL4	-4.3086	2.04301e-05	0.000274951	Female
IL12RB1	-4.30828	2.04589e-05	0.000275155	Female
RHOJ	-4.30724	2.0551e-05	0.000276211	Female
SP140	-4.30673	2.05967e-05	0.000276641	Female
KCNS2	-4.30598	2.06636e-05	0.000277355	Female
TREML2	-4.30363	2.08749e-05	0.000280006	Female
ADC	-4.30297	2.09343e-05	0.000280289	Female
MEFV	-4.30295	2.09359e-05	0.000280289	Female
PGD	-4.30294	2.09376e-05	0.000280289	Female
DARC	-4.30268	2.09608e-05	0.000280414	Female
ARHGAP31	-4.30219	2.10049e-05	0.000280819	Female
CSTA	-4.29956	2.12456e-05	0.00028385	Female
SERPING1	-4.2981	2.13801e-05	0.00028527	Female
PSTPIP1	-4.29716	2.14668e-05	0.000286051	Female
C16orf89	-4.29585	2.1589e-05	0.000287488	Female
MYL6	-4.29467	2.16987e-05	0.00028876	Female
CCL4L2	-4.29438	2.17261e-05	0.000288935	Female
EMR4P	-4.29414	2.17486e-05	0.000289044	Female
TNFRSF1B	-4.29381	2.17799e-05	0.00028927	Female
MKL1	-4.29166	2.19832e-05	0.000291778	Female
ISM1	-4.29009	2.2132e-05	0.000293561	Female
LOC572558	-4.28805	2.23284e-05	0.000295779	Female
CHI3L2	-4.28789	2.23433e-05	0.000295782	Female
DCHS1	-4.28701	2.24283e-05	0.00029652	Female
SURF4	-4.28715	2.24145e-05	0.00029652	Female
CASS4	-4.28645	2.24828e-05	0.000297046	Female
DDIT4L	-4.28559	2.25667e-05	0.000297765	Female
GPR18	-4.28542	2.25824e-05	0.000297779	Female
FLJ16779	-4.28431	2.26907e-05	0.000298623	Female
IL11	-4.28442	2.26802e-05	0.000298623	Female
ST6GAL1	-4.28439	2.26836e-05	0.000298623	Female
ITPRIP	-4.28265	2.2854e-05	0.000300577	Female
KLHL4	-4.28158	2.29594e-05	0.000301768	Female
SPATC1	-4.28055	2.3062e-05	0.000302919	Female
GPR162	-4.27954	2.31622e-05	0.000303936	Female
SLIT2	-4.27947	2.31695e-05	0.000303936	Female
LOH3CR2A	-4.27878	2.32378e-05	0.000304438	Female
PDE6G	-4.27614	2.35041e-05	0.000307528	Female
MGC12916	-4.27413	2.37075e-05	0.000309789	Female
TYMP	-4.27039	2.40918e-05	0.000314608	Female
GIMAP8	-4.27005	2.41277e-05	0.000314734	Female
FGFBP1	-4.26846	2.42934e-05	0.000316628	Female
OSM	-4.26795	2.43463e-05	0.000317113	Female
SLC16A2	-4.26559	2.45946e-05	0.000319731	Female
ST8SIA4	-4.26559	2.45947e-05	0.000319731	Female
RASIP1	-4.26064	2.51226e-05	0.000326175	Female
LYVE1	-4.25873	2.53291e-05	0.000328225	Female
KANK3	-4.25761	2.54506e-05	0.000329588	Female
KCTD10	-4.25729	2.5486e-05	0.000329707	Female
RSPH9	-4.25683	2.55361e-05	0.000330062	Female
FILIP1	-4.25648	2.55743e-05	0.000330134	Female
PKIG	-4.25662	2.55598e-05	0.000330134	Female
APOC2	-4.25523	2.57119e-05	0.000331699	Female
SLC2A4	-4.25306	2.59523e-05	0.000334374	Female
TPPP3	-4.25254	2.60104e-05	0.000334909	Female
NCF4	-4.25103	2.61788e-05	0.00033666	Female
SOX17	-4.24771	2.65533e-05	0.000340815	Female
MYEOV2	-4.2462	2.67264e-05	0.00034282	Female
STAB2	-4.246	2.6749e-05	0.000342892	Female
KLF17	-4.24456	2.69144e-05	0.000343923	Female
UTF1	-4.24458	2.69117e-05	0.000343923	Female
EGR3	-4.24383	2.69981e-05	0.000344558	Female
IL18	-4.24331	2.70581e-05	0.000345106	Female
TLR9	-4.2418	2.72341e-05	0.000346913	Female
MIAT	-4.24018	2.74224e-05	0.000349092	Female
TDO2	-4.23837	2.76358e-05	0.000351366	Female
C12orf68	-4.23643	2.78657e-05	0.000354067	Female
PDGFRL	-4.23452	2.80942e-05	0.000356747	Female
SMTN	-4.23275	2.83071e-05	0.000359	Female
MYC	-4.23214	2.83804e-05	0.000359704	Female
PLA2G7	-4.23009	2.86301e-05	0.000362643	Female
PHYHIP	-4.22633	2.90928e-05	0.000368272	Female
MAGEL2	-4.22134	2.97181e-05	0.000375718	Female
CC2D2B	-4.21991	2.98991e-05	0.00037777	Female
LCN8	-4.21829	3.01053e-05	0.000380128	Female
MYH13	-4.21815	3.01233e-05	0.000380128	Female
HECW1	-4.21751	3.02055e-05	0.000380929	Female
SLC15A3	-4.21695	3.02774e-05	0.000381597	Female
SUSD3	-4.21658	3.03259e-05	0.000381971	Female
CHRM2	-4.2161	3.03878e-05	0.000382512	Female
LPPR4	-4.21566	3.04448e-05	0.000382753	Female
RAB31	-4.21443	3.06036e-05	0.000384511	Female
EPHA3	-4.21276	3.08224e-05	0.000387021	Female
HILS1	-4.21246	3.08613e-05	0.000387268	Female
CRIP1	-4.21195	3.09287e-05	0.000387874	Female
STARD5	-4.20899	3.13195e-05	0.000392046	Female
GPR114	-4.20823	3.14211e-05	0.000393074	Female
PCDH18	-4.20691	3.15974e-05	0.000394792	Female
JDP2	-4.20623	3.16896e-05	0.000395699	Female
LTC4S	-4.20105	3.23938e-05	0.000403995	Female
GZMA	-4.20035	3.24894e-05	0.000404439	Female
SLC9A3R2	-4.19997	3.25419e-05	0.000404595	Female
NXPH3	-4.19687	3.29726e-05	0.000409447	Female
ADAMTS9	-4.19667	3.30002e-05	0.000409538	Female
AMPD1	-4.19515	3.32132e-05	0.000411863	Female
FAM129A	-4.19373	3.34143e-05	0.000413663	Female
HLA-DMB	-4.19283	3.3542e-05	0.00041499	Female
VAT1L	-4.18548	3.46005e-05	0.000426782	Female
EID3	-4.18445	3.47521e-05	0.000428129	Female
PNMAL1	-4.18139	3.52046e-05	0.000432766	Female
HLA-DQA1	-4.18113	3.52433e-05	0.000432863	Female
AFAP1L2	-4.17986	3.54326e-05	0.000434773	Female
PALM	-4.1798	3.54417e-05	0.000434773	Female
SARDH	-4.17816	3.5688e-05	0.000437265	Female
C1orf200	-4.17792	3.57242e-05	0.000437443	Female
TGFB1	-4.1763	3.59691e-05	0.000439644	Female
ITGAD	-4.17163	3.66837e-05	0.000447906	Female
TNFRSF9	-4.1716	3.66893e-05	0.000447906	Female
LTF	-4.17105	3.67744e-05	0.000448404	Female
SDC2	-4.17083	3.68085e-05	0.00044855	Female
VEGFB	-4.16883	3.71193e-05	0.000451793	Female
RNH1	-4.1681	3.72347e-05	0.000452191	Female
SPINK2	-4.16794	3.72592e-05	0.000452191	Female
MAOB	-4.16762	3.73093e-05	0.000452202	Female
DPEP1	-4.16459	3.77883e-05	0.000457734	Female
HSPB3	-4.16428	3.78384e-05	0.000458066	Female
SEC61B	-4.16163	3.82632e-05	0.000462103	Female
RENBP	-4.1597	3.85739e-05	0.000465579	Female
DNAJC5B	-4.15931	3.86385e-05	0.000466079	Female
MCOLN2	-4.15755	3.89241e-05	0.000469245	Female
DSE	-4.15714	3.89914e-05	0.000469498	Female
SLC25A28	-4.15545	3.92701e-05	0.000472573	Female
LEPREL2	-4.15371	3.95584e-05	0.000475476	Female
RHOG	-4.15138	3.99475e-05	0.000479763	Female
SOX7	-4.15101	4.00099e-05	0.000479763	Female
TNFRSF6B	-4.1511	3.99945e-05	0.000479763	Female
ANXA2	-4.14593	4.08706e-05	0.000489504	Female
CCL4	-4.14325	4.13329e-05	0.000494456	Female
F2RL3	-4.13702	4.24262e-05	0.000506935	Female
HVCN1	-4.13451	4.28735e-05	0.000511978	Female
AKAP13	-4.13413	4.29429e-05	0.000512505	Female
TMEM220	-4.12934	4.38109e-05	0.000521735	Female
BMX	-4.12775	4.41032e-05	0.000524499	Female
TMEM200B	-4.12436	4.47325e-05	0.000531356	Female
ODF3B	-4.12416	4.47698e-05	0.000531488	Female
BNC1	-4.12395	4.48097e-05	0.000531649	Female
GALNT5	-4.1231	4.49691e-05	0.000532916	Female
SERPINA9	-4.12186	4.52029e-05	0.000534805	Female
RGS11	-4.12163	4.52448e-05	0.00053493	Female
ME1	-4.12049	4.54622e-05	0.000536873	Female
CREM	-4.11952	4.56464e-05	0.00053842	Female
PHOSPHO1	-4.11897	4.57514e-05	0.000539344	Female
HCG22	-4.11727	4.60752e-05	0.000542631	Female
RILPL2	-4.11723	4.60839e-05	0.000542631	Female
SCML4	-4.11613	4.6295e-05	0.000544801	Female
SLC26A10	-4.11494	4.65261e-05	0.000547202	Female
TCF25	-4.11275	4.69534e-05	0.000551266	Female
VIPR2	-4.11285	4.69329e-05	0.000551266	Female
FAM46C	-4.11169	4.71607e-05	0.000553379	Female
RAB27A	-4.11099	4.72978e-05	0.000554667	Female
JAZF1	-4.11075	4.7345e-05	0.000554899	Female
RCAN1	-4.10944	4.76041e-05	0.000557332	Female
TNIP3	-4.10942	4.76076e-05	0.000557332	Female
LATS2	-4.10918	4.76554e-05	0.000557568	Female
PIP4K2A	-4.1086	4.77716e-05	0.000558605	Female
DNAJB5	-4.10541	4.84103e-05	0.000565746	Female
LOC100270710	-4.10473	4.85471e-05	0.000567018	Female
COL4A2	-4.10381	4.87328e-05	0.000568859	Female
LGI4	-4.10288	4.89209e-05	0.000570725	Female
ZC3H12D	-4.10267	4.8965e-05	0.000570911	Female
TBXA2R	-4.10252	4.89946e-05	0.000570926	Female
LEPRE1	-4.10159	4.9184e-05	0.000572587	Female
SRPRB	-4.10155	4.91937e-05	0.000572587	Female
CKAP4	-4.10108	4.92894e-05	0.000573042	Female
LRP10	-4.10115	4.92738e-05	0.000573042	Female
IL3RA	-4.10046	4.94168e-05	0.000574194	Female
NKG7	-4.09998	4.95147e-05	0.000575001	Female
GCNT3	-4.09964	4.95852e-05	0.000575489	Female
PPP2R3C	-4.09545	5.04561e-05	0.000584258	Female
SLA2	-4.09521	5.05048e-05	0.000584487	Female
FXYD7	-4.09463	5.06268e-05	0.000585564	Female
CYTH1	-4.09384	5.07935e-05	0.000586822	Female
SELP	-4.09397	5.07658e-05	0.000586822	Female
CD82	-4.09328	5.0913e-05	0.000587867	Female
NUPR1	-4.09274	5.10265e-05	0.000588841	Female
LMO3	-4.09028	5.1549e-05	0.000594193	Female
C17orf107	-4.0875	5.21484e-05	0.00060076	Female
CCDC102B	-4.0872	5.22123e-05	0.000600813	Female
MUC4	-4.08697	5.22626e-05	0.00060105	Female
MXRA7	-4.08644	5.23774e-05	0.000602028	Female
WNT3A	-4.08577	5.25228e-05	0.000603356	Female
SNAI2	-4.0856	5.25586e-05	0.000603425	Female
GULP1	-4.08392	5.29261e-05	0.000606956	Female
LCE3C	-4.08236	5.32694e-05	0.000610547	Female
CCDC88B	-4.08215	5.33161e-05	0.000610736	Female
LOC282997	-4.07949	5.39057e-05	0.000616792	Female
SAMD3	-4.07875	5.40706e-05	0.00061833	Female
ARHGAP25	-4.07478	5.4966e-05	0.000626065	Female
SLC3A2	-4.07466	5.49945e-05	0.000626065	Female
TRAT1	-4.07438	5.50582e-05	0.000626086	Female
FRMD6	-4.07061	5.59224e-05	0.000634843	Female
SLC39A14	-4.06987	5.60948e-05	0.000636087	Female
SIGLEC12	-4.06914	5.62631e-05	0.000637638	Female
GUCY1B3	-4.06466	5.73142e-05	0.000648461	Female
TLR6	-4.06401	5.74672e-05	0.000649829	Female
LRRC2	-4.0633	5.76346e-05	0.000651358	Female
DKK1	-4.06213	5.79142e-05	0.000653788	Female
HLA-DRA	-4.05921	5.86151e-05	0.000660595	Female
GREM2	-4.05831	5.88335e-05	0.000662319	Female
GPR84	-4.05767	5.8988e-05	0.000663688	Female
HDAC9	-4.0574	5.90535e-05	0.000664057	Female
ADAMTSL3	-4.05413	5.98542e-05	0.000672687	Female
ANK2	-4.05142	6.05271e-05	0.000678937	Female
ARHGAP30	-4.05135	6.05445e-05	0.000678937	Female
FAS	-4.05142	6.0528e-05	0.000678937	Female
KCNK2	-4.04957	6.09885e-05	0.000683537	Female
LRRN2	-4.0476	6.14861e-05	0.000688352	Female
AP1S2	-4.04739	6.15383e-05	0.000688555	Female
PRSS23	-4.04631	6.18113e-05	0.000691228	Female
IGFBP4	-4.04533	6.20621e-05	0.000693444	Female
TBX18	-4.04343	6.25487e-05	0.000697931	Female
C6orf142	-4.04126	6.31093e-05	0.000703799	Female
SRXN1	-4.0404	6.33319e-05	0.000705893	Female
WFDC1	-4.0393	6.36175e-05	0.000707906	Female
IFITM1	-4.03871	6.37723e-05	0.000709239	Female
ZNF385D	-4.03836	6.38633e-05	0.000709861	Female
CDH2	-4.03768	6.40433e-05	0.000711471	Female
HAR1B	-4.037	6.42221e-05	0.000713066	Female
TEK	-4.03609	6.44616e-05	0.00071455	Female
ATP6V0E1	-4.03527	6.46775e-05	0.000715766	Female
TXNDC15	-4.03533	6.46628e-05	0.000715766	Female
BDNF	-4.03497	6.47596e-05	0.000716284	Female
LOC100302650	-4.03386	6.50549e-05	0.000718764	Female
C19orf38	-4.03343	6.51696e-05	0.000719582	Female
LPAR6	-4.02814	6.65954e-05	0.000734182	Female
NUAK1	-4.02716	6.68642e-05	0.000736343	Female
RNF122	-4.02697	6.69169e-05	0.000736522	Female
TMPRSS11B	-4.02542	6.73427e-05	0.000740806	Female
HSPG2	-4.02238	6.81844e-05	0.000749251	Female
C17orf60	-4.01951	6.89909e-05	0.000757291	Female
GPX3	-4.01823	6.9351e-05	0.000760831	Female
TMEM156	-4.01547	7.01378e-05	0.00076863	Female
MITF	-4.01463	7.03803e-05	0.000770869	Female
FAM101A	-4.01409	7.05345e-05	0.000772141	Female
FKBP5	-4.01138	7.13209e-05	0.000779064	Female
NGF	-4.00574	7.29791e-05	0.00079546	Female
FCER1A	-4.00462	7.33124e-05	0.000798663	Female
RPL23AP82	-4.00436	7.33913e-05	0.000799093	Female
ABCB6	-4.00126	7.43222e-05	0.000807925	Female
RABAC1	-4.00004	7.46928e-05	0.000811082	Female
GZMH	-3.99981	7.47638e-05	0.000811418	Female
DLC1	-3.99933	7.49103e-05	0.000812572	Female
TMPRSS11F	-3.99612	7.58937e-05	0.000822358	Female
PHLDB1	-3.9958	7.59928e-05	0.000822493	Female
PLXDC1	-3.99556	7.60688e-05	0.000822493	Female
SIRPB2	-3.99559	7.60588e-05	0.000822493	Female
C22orf25	-3.99443	7.64172e-05	0.000825819	Female
NPHS1	-3.99386	7.65947e-05	0.000827296	Female
C6orf123	-3.99341	7.67358e-05	0.000828378	Female
IKBIP	-3.99306	7.68437e-05	0.000829101	Female
DYRK3	-3.99288	7.69012e-05	0.000829279	Female
ADCY7	-3.99267	7.69658e-05	0.000829534	Female
FAM124A	-3.98848	7.82904e-05	0.000842102	Female
LOC400759	-3.98845	7.82983e-05	0.000842102	Female
TXNDC3	-3.98675	7.88413e-05	0.000847492	Female
CDC42EP1	-3.98585	7.91296e-05	0.000849809	Female
SLC9A9	-3.98515	7.93546e-05	0.000851201	Female
LSP1	-3.98418	7.96664e-05	0.000853641	Female
GPR85	-3.98384	7.97786e-05	0.000854038	Female
TNFRSF18	-3.98381	7.97879e-05	0.000854038	Female
MUC12	-3.98357	7.98638e-05	0.000854399	Female
EVC	-3.98339	7.99222e-05	0.000854572	Female
CHST7	-3.9817	8.04729e-05	0.000859553	Female
ANKH	-3.98064	8.08196e-05	0.00086199	Female
B4GALNT1	-3.98064	8.08215e-05	0.00086199	Female
C7orf58	-3.98061	8.08288e-05	0.00086199	Female
CFD	-3.97803	8.16787e-05	0.000870594	Female
IGFL2	-3.97662	8.21479e-05	0.000874206	Female
RETN	-3.97649	8.21903e-05	0.000874206	Female
ETS1	-3.97528	8.25955e-05	0.000877593	Female
CD72	-3.97493	8.27115e-05	0.000877907	Female
FERMT2	-3.97491	8.27196e-05	0.000877907	Female
NCAM2	-3.97397	8.30327e-05	0.00088039	Female
CCL13	-3.97213	8.3655e-05	0.00088606	Female
FAIM3	-3.97054	8.41963e-05	0.000890396	Female
ATOX1	-3.96821	8.49932e-05	0.000897728	Female
SEPT4	-3.96825	8.49777e-05	0.000897728	Female
HLA-DPA1	-3.96416	8.63963e-05	0.000911756	Female
DIRAS1	-3.96125	8.74166e-05	0.000921562	Female
C5orf62	-3.95969	8.79695e-05	0.000926425	Female
GUCY2E	-3.9595	8.80358e-05	0.000926642	Female
FMNL1	-3.95898	8.82221e-05	0.000928121	Female
CYP26B1	-3.95648	8.91184e-05	0.000937063	Female
C2orf85	-3.95319	9.03066e-05	0.000948571	Female
LTBP4	-3.95295	9.03965e-05	0.000949022	Female
ST6GALNAC4	-3.95243	9.05835e-05	0.000950493	Female
TREML1	-3.95012	9.14303e-05	0.000958881	Female
EMR2	-3.9492	9.17711e-05	0.00096164	Female
GRIA3	-3.94826	9.21205e-05	0.000964121	Female
C14orf37	-3.94693	9.26147e-05	0.000968793	Female
REXO2	-3.94642	9.28061e-05	0.000970294	Female
HLA-DQB1	-3.94474	9.34345e-05	0.000975855	Female
MARVELD1	-3.94277	9.41772e-05	0.000982599	Female
RAPGEF1	-3.94173	9.45724e-05	0.000985979	Female
RRAD	-3.94166	9.45987e-05	0.000985979	Female
SERPINB2	-3.94137	9.47115e-05	0.000986402	Female
SLC24A4	-3.94076	9.49431e-05	0.000988043	Female
BHLHE22	-3.93892	9.56488e-05	0.000994364	Female
CHST11	-3.93904	9.5601e-05	0.000994364	Female
SLC1A5	-3.93803	9.59904e-05	0.000997403	Female
CSRP1	-3.93687	9.64373e-05	0.00100153	Female
FAM159A	-3.93263	9.80968e-05	0.00101772	Female
VSNL1	-3.9311	9.8701e-05	0.00102347	Female
TREML4	-3.93091	9.87759e-05	0.00102372	Female
SPRYD3	-3.9298	9.92154e-05	0.00102706	Female
ZBP1	-3.92995	9.91564e-05	0.00102706	Female
FOXP3	-3.9293	9.94155e-05	0.00102824	Female
IGSF10	-3.92819	9.98599e-05	0.00103231	Female
ADA	-3.928	9.9934e-05	0.00103255	Female
TENC1	-3.92638	0.000100586	0.0010377	Female
HEPACAM	-3.92467	0.000101279	0.00104432	Female
C22orf15	-3.92425	0.000101447	0.00104551	Female
DIXDC1	-3.92155	0.00010255	0.00105634	Female
DOK6	-3.92108	0.000102743	0.00105726	Female
UBE2F	-3.9202	0.000103106	0.00106045	Female
SAMD14	-3.91909	0.000103566	0.00106302	Female
STK38L	-3.91728	0.00010432	0.00106968	Female
DTHD1	-3.91357	0.000105881	0.00108342	Female
S1PR2	-3.91307	0.000106091	0.00108454	Female
SAMD4A	-3.9115	0.000106758	0.00109081	Female
SLAMF7	-3.90809	0.000108225	0.00110444	Female
LOC283663	-3.90771	0.000108388	0.00110523	Female
FZD1	-3.90733	0.000108554	0.00110581	Female
SIGLEC11	-3.90744	0.000108506	0.00110581	Female
RNASE1	-3.90438	0.000109837	0.00111776	Female
GPSM3	-3.90399	0.00011001	0.00111895	Female
GFI1	-3.90353	0.00011021	0.00112042	Female
AHNAK	-3.90297	0.000110458	0.00112238	Female
RELB	-3.90149	0.000111111	0.00112845	Female
PDZD4	-3.90039	0.000111599	0.00113227	Female
GDF10	-3.89829	0.000112539	0.00114066	Female
ACSM5	-3.89775	0.000112781	0.00114197	Female
FAM107A	-3.89434	0.000114323	0.00115701	Female
DNAJB4	-3.89222	0.000115293	0.00116566	Female
GBGT1	-3.89152	0.000115614	0.00116831	Female
PLP1	-3.89118	0.000115768	0.0011693	Female
PCDH12	-3.89094	0.00011588	0.00116984	Female
CHST6	-3.89062	0.000116031	0.00117044	Female
SNAI3	-3.89056	0.000116055	0.00117044	Female
DYNLL1	-3.88876	0.000116892	0.00117771	Female
NLRP12	-3.88876	0.00011689	0.00117771	Female
ARPC2	-3.88813	0.000117184	0.00118006	Female
ARPC1B	-3.88791	0.000117287	0.00118051	Female
AQP9	-3.88458	0.000118849	0.00119385	Female
SOCS1	-3.884	0.000119124	0.00119603	Female
GIMAP7	-3.88062	0.000120733	0.00121098	Female
SYT15	-3.87988	0.00012109	0.00121395	Female
JAG1	-3.87971	0.000121169	0.00121415	Female
CARD16	-3.8784	0.000121802	0.00121989	Female
BCAR1	-3.87728	0.000122346	0.00122473	Female
ACTB	-3.87233	0.000124768	0.00124774	Female
FEZ1	-3.87215	0.00012486	0.00124804	Female
GCLM	-3.87072	0.000125568	0.0012545	Female
SPOCK2	-3.87	0.000125928	0.00125742	Female
TMPRSS11BNL	-3.86988	0.000125985	0.00125742	Female
HTR2A	-3.86773	0.000127063	0.00126694	Female
PAMR1	-3.86781	0.000127026	0.00126694	Female
LCK	-3.86726	0.000127299	0.00126866	Female
OSBPL6	-3.86687	0.000127496	0.00126938	Female
EPYC	-3.86537	0.000128256	0.00127506	Female
GPR141	-3.86537	0.000128256	0.00127506	Female
SORBS1	-3.86385	0.000129031	0.00128151	Female
MFSD1	-3.86231	0.000129821	0.00128746	Female
FBXW5	-3.86055	0.000130723	0.00129514	Female
EYA2	-3.85952	0.000131258	0.0012998	Female
FCRLA	-3.85642	0.000132877	0.00131391	Female
PENK	-3.85578	0.000133212	0.00131594	Female
CYP2S1	-3.85556	0.000133329	0.00131644	Female
LDB2	-3.85234	0.000135034	0.00133198	Female
HPD	-3.852	0.000135213	0.00133309	Female
C1orf110	-3.85004	0.000136266	0.00134152	Female
VCL	-3.84731	0.000137741	0.00135406	Female
RPL3L	-3.84689	0.00013797	0.00135565	Female
CYB5R3	-3.84363	0.000139751	0.0013714	Female
PLAU	-3.84359	0.000139775	0.0013714	Female
ADAMTS3	-3.84322	0.000139979	0.00137273	Female
AMPD2	-3.84309	0.000140048	0.00137274	Female
RNF175	-3.84092	0.000141251	0.00138186	Female
STEAP1	-3.84039	0.000141546	0.00138408	Female
LOXL2	-3.8396	0.000141987	0.00138705	Female
FAT4	-3.83867	0.000142506	0.00139099	Female
CXCL14	-3.83788	0.000142954	0.0013938	Female
IL2RB	-3.83612	0.000143945	0.00140211	Female
HAPLN4	-3.83575	0.000144152	0.00140345	Female
PKNOX2	-3.83536	0.000144375	0.00140495	Female
SOCS3	-3.83458	0.000144818	0.00140858	Female
PPP2R4	-3.83422	0.000145026	0.00140993	Female
SLC43A3	-3.83379	0.000145268	0.0014116	Female
RARB	-3.83306	0.000145684	0.00141429	Female
MARCH3	-3.82628	0.000149616	0.00144898	Female
TBX5	-3.82585	0.000149871	0.00145006	Female
BCL6B	-3.82572	0.000149945	0.00145009	Female
RBP7	-3.82549	0.00015008	0.0014507	Female
FAM176B	-3.82472	0.000150538	0.00145444	Female
C9orf95	-3.82265	0.000151762	0.00146556	Female
RFTN1	-3.81668	0.000155354	0.00149525	Female
KIAA1614	-3.81478	0.000156514	0.00150428	Female
ANGPTL6	-3.81365	0.000157206	0.00151021	Female
F2R	-3.81312	0.000157537	0.00151267	Female
CORO1C	-3.81146	0.000158559	0.00152104	Female
PYGM	-3.81124	0.000158699	0.00152166	Female
PRDX1	-3.81033	0.000159265	0.00152564	Female
CLEC7A	-3.80927	0.000159923	0.00153122	Female
CHRNE	-3.80893	0.000160139	0.00153256	Female
CERK	-3.80384	0.000163352	0.00155742	Female
FKBP7	-3.80142	0.000164904	0.00157148	Female
CYP21A2	-3.7991	0.000166407	0.0015822	Female
DNAJB6	-3.79908	0.00016642	0.0015822	Female
CRTAM	-3.79848	0.000166805	0.00158512	Female
CXorf36	-3.79726	0.000167606	0.00159123	Female
CD244	-3.79703	0.000167757	0.00159192	Female
USHBP1	-3.79308	0.000170358	0.00161358	Female
SCN7A	-3.78764	0.000174007	0.00164583	Female
CCL3L1	-3.78558	0.000175406	0.00165597	Female
CLIP2	-3.78306	0.000177132	0.00166992	Female
PELO	-3.78148	0.000178224	0.00167866	Female
TRIM61	-3.78129	0.000178352	0.00167908	Female
IL1R1	-3.77725	0.000181173	0.00170405	Female
DSG3	-3.77649	0.000181711	0.00170832	Female
TM4SF1	-3.77602	0.000182039	0.00171061	Female
ACTN3	-3.77494	0.000182808	0.00171703	Female
ZFHX4	-3.77481	0.000182899	0.00171709	Female
CBFA2T3	-3.77437	0.000183208	0.0017192	Female
AQP1	-3.77347	0.000183852	0.00172303	Female
RCAN2	-3.76653	0.000188866	0.00176574	Female
TMCC3	-3.76662	0.000188801	0.00176574	Female
MMP13	-3.76406	0.00019068	0.00178106	Female
NRXN1	-3.76201	0.000192203	0.00179445	Female
CADPS	-3.76165	0.000192465	0.00179608	Female
METRN	-3.7612	0.0001928	0.00179754	Female
SAMD11	-3.76093	0.000193003	0.00179861	Female
ENDOD1	-3.76079	0.000193105	0.00179873	Female
HLA-DQA2	-3.75965	0.00019396	0.00180586	Female
BMPER	-3.75931	0.000194216	0.00180741	Female
PCSK5	-3.75796	0.000195233	0.00181605	Female
C11orf68	-3.75718	0.000195826	0.00182072	Female
MMP3	-3.75525	0.000197289	0.0018318	Female
CHIT1	-3.75354	0.000198598	0.00184311	Female
VDAC2	-3.75294	0.000199054	0.00184565	Female
SMAD5OS	-3.75155	0.000200126	0.0018522	Female
NCS1	-3.75083	0.000200685	0.00185652	Female
MAPKAPK2	-3.7502	0.000201176	0.00186021	Female
CACNA1C	-3.7499	0.000201405	0.00186122	Female
SIPA1	-3.74982	0.000201469	0.00186122	Female
ADCY5	-3.74928	0.000201889	0.00186425	Female
ENOX1	-3.74896	0.000202142	0.00186574	Female
GNG7	-3.74701	0.000203667	0.0018781	Female
TSPAN18	-3.74703	0.000203648	0.0018781	Female
ANGPTL7	-3.74681	0.000203821	0.00187866	Female
FLJ36031	-3.74466	0.000205521	0.00189347	Female
MT1E	-3.74385	0.000206158	0.00189847	Female
KIAA0513	-3.74276	0.000207033	0.00190567	Female
XIST	-3.7424	0.000207318	0.00190742	Female
CYP1B1	-3.74187	0.000207738	0.00191041	Female
KRT1	-3.74121	0.000208268	0.00191442	Female
CLSTN2	-3.74075	0.000208637	0.00191607	Female
FAM65B	-3.74039	0.000208925	0.00191785	Female
ADAMTS15	-3.73949	0.000209652	0.00192365	Female
TM7SF4	-3.73824	0.000210666	0.00193032	Female
RTN1	-3.73521	0.000213138	0.00195209	Female
PPP1R12B	-3.73499	0.000213312	0.0019528	Female
CD69	-3.73445	0.000213759	0.00195601	Female
DRP2	-3.7331	0.000214868	0.00196527	Female
C5orf23	-3.73188	0.000215883	0.00197043	Female
KLRD1	-3.73184	0.000215919	0.00197043	Female
ECHDC3	-3.72953	0.000217837	0.00198704	Female
SYPL2	-3.7287	0.000218536	0.00199252	Female
SPINK5	-3.72843	0.000218764	0.0019937	Female
PCDHGA12	-3.72792	0.000219189	0.00199667	Female
C13orf15	-3.72479	0.000221844	0.00201995	Female
SLC6A9	-3.72353	0.000222917	0.0020288	Female
FMNL3	-3.72339	0.000223033	0.00202895	Female
CLLU1	-3.7205	0.000225523	0.00204884	Female
RIMBP2	-3.72054	0.000225487	0.00204884	Female
LITAF	-3.71968	0.000226231	0.00205434	Female
SERP1	-3.71839	0.000227354	0.00206177	Female
CAMK1G	-3.71721	0.000228386	0.00206928	Female
PEG3	-3.71674	0.000228797	0.00207207	Female
NFIX	-3.71365	0.000231516	0.00209482	Female
STX2	-3.71299	0.000232104	0.00209921	Female
DIO3OS	-3.71242	0.000232616	0.0021029	Female
CD3G	-3.7117	0.000233252	0.00210617	Female
NKAPL	-3.71019	0.000234606	0.00211522	Female
CD99L2	-3.70949	0.000235231	0.0021199	Female
HABP4	-3.70853	0.0002361	0.00212396	Female
TMEM59L	-3.70855	0.000236082	0.00212396	Female
SLC35B4	-3.70809	0.000236501	0.00212662	Female
ADORA1	-3.70632	0.000238102	0.00213911	Female
COTL1	-3.70393	0.000240289	0.0021578	Female
SPP1	-3.7016	0.000242431	0.00217442	Female
TMEM132B	-3.7002	0.000243736	0.00218488	Female
ELTD1	-3.6985	0.000245325	0.00219621	Female
TSPAN32	-3.69795	0.000245833	0.00219978	Female
PLAC8	-3.6973	0.000246444	0.00220427	Female
ZMYND15	-3.69568	0.000247971	0.00221598	Female
PAX5	-3.69431	0.000249267	0.00222657	Female
CDV3	-3.6937	0.000249854	0.00222788	Female
HLA-DRB1	-3.6939	0.000249667	0.00222788	Female
IFI27L2	-3.69385	0.000249709	0.00222788	Female
ARL2BP	-3.69322	0.000250305	0.00223092	Female
ODZ4	-3.6923	0.000251193	0.00223686	Female
C2CD4B	-3.69081	0.000252619	0.00224758	Female
CCDC36	-3.68711	0.000256205	0.00227749	Female
KRT14	-3.68584	0.000257442	0.00228648	Female
APOD	-3.6818	0.000261431	0.0023148	Female
SLITRK2	-3.67878	0.000264445	0.00233739	Female
VDR	-3.67711	0.000266133	0.00235026	Female
KIF17	-3.67625	0.000267004	0.0023559	Female
SH2B3	-3.67506	0.000268205	0.00236443	Female
CPEB1	-3.67342	0.000269878	0.00237607	Female
CFH	-3.67198	0.000271365	0.00238453	Female
MAFB	-3.67192	0.000271418	0.00238453	Female
PRRG3	-3.6719	0.000271446	0.00238453	Female
S100A10	-3.6718	0.000271545	0.00238453	Female
TIPARP	-3.67188	0.000271464	0.00238453	Female
HLA-DQB2	-3.67166	0.000271687	0.00238474	Female
C5orf39	-3.66998	0.000273427	0.00239793	Female
WIPI1	-3.66874	0.00027472	0.00240719	Female
OXT	-3.66756	0.000275946	0.00241689	Female
AKR1C2	-3.66637	0.000277194	0.00242416	Female
SIDT2	-3.6665	0.000277056	0.00242416	Female
KRT24	-3.66406	0.000279623	0.00244169	Female
NLRC3	-3.66223	0.000281575	0.00245662	Female
C2	-3.66202	0.000281797	0.00245749	Female
OSMR	-3.66166	0.000282184	0.00245981	Female
DEFA1B	-3.66112	0.000282754	0.00246372	Female
KCNAB1	-3.65819	0.000285906	0.00249012	Female
C15orf48	-3.65737	0.000286794	0.00249463	Female
VWF	-3.65723	0.000286942	0.00249484	Female
VIT	-3.65694	0.000287258	0.00249652	Female
IQGAP2	-3.65633	0.000287921	0.0025012	Female
GPIHBP1	-3.65599	0.000288297	0.00250232	Female
ADAMTS5	-3.65399	0.00029048	0.00251911	Female
CLDN17	-3.65171	0.000292989	0.00253652	Female
CNPY4	-3.64922	0.000295761	0.00255943	Female
BAG3	-3.64881	0.000296221	0.00256122	Female
RRAS	-3.64891	0.000296109	0.00256122	Female
PELI2	-3.64667	0.000298614	0.0025797	Female
RPL36AL	-3.64622	0.000299127	0.00258303	Female
AFF3	-3.64585	0.000299548	0.00258556	Female
FAM49A	-3.64572	0.000299693	0.00258558	Female
GUK1	-3.64562	0.000299806	0.00258558	Female
OLFM4	-3.64549	0.000299952	0.00258574	Female
PITX2	-3.64514	0.000300343	0.00258801	Female
PLXND1	-3.6445	0.000301075	0.00259322	Female
TGM2	-3.6417	0.000304265	0.00261946	Female
SLC27A1	-3.64105	0.000305016	0.00262219	Female
AGPAT4	-3.64054	0.000305598	0.00262435	Female
IL24	-3.6397	0.00030657	0.00263158	Female
FBXL21	-3.63615	0.000310686	0.00266579	Female
LRMP	-3.63263	0.000314824	0.00269558	Female
EMR3	-3.63217	0.000315372	0.00269815	Female
TSPAN2	-3.632	0.000315574	0.00269858	Female
CD300LG	-3.62874	0.00031947	0.00272613	Female
TXN	-3.62852	0.000319733	0.00272723	Female
CDH22	-3.62757	0.000320869	0.00273577	Female
TCEAL2	-3.62692	0.000321654	0.00274015	Female
HAMP	-3.62485	0.000324162	0.00275803	Female
SLC13A5	-3.62423	0.000324917	0.0027633	Female
KCNH2	-3.62005	0.000330047	0.00280457	Female
WDR86	-3.61961	0.000330602	0.00280693	Female
PDE4D	-3.61941	0.000330844	0.0028078	Female
SGCE	-3.61804	0.00033255	0.0028211	Female
TACR1	-3.61786	0.000332774	0.00282181	Female
CYP2B7P1	-3.61658	0.000334377	0.00283312	Female
TSPAN5	-3.61657	0.000334387	0.00283312	Female
IMPDH1	-3.61503	0.000336317	0.00284828	Female
CYYR1	-3.6145	0.000336988	0.00285173	Female
PHPT1	-3.61358	0.000338147	0.002859	Female
SOX18	-3.61363	0.000338083	0.002859	Female
LAG3	-3.61244	0.000339588	0.00286878	Female
TMTC1	-3.61255	0.00033945	0.00286878	Female
C17orf99	-3.61178	0.000340434	0.00287233	Female
TRIL	-3.61119	0.000341181	0.00287743	Female
BIRC7	-3.60969	0.00034311	0.0028913	Female
IL5RA	-3.60887	0.000344153	0.00289773	Female
RPS27A	-3.60887	0.00034416	0.00289773	Female
YKT6	-3.60704	0.000346517	0.0029151	Female
BTBD19	-3.60514	0.000348994	0.00293355	Female
SSPN	-3.60441	0.000349946	0.00294033	Female
ANKRD35	-3.60382	0.000350716	0.00294557	Female
CCL5	-3.60256	0.000352375	0.00295706	Female
GAP43	-3.60116	0.000354219	0.0029713	Female
LOC401463	-3.6009	0.000354556	0.00297289	Female
HTR3A	-3.597	0.000359748	0.00301169	Female
MEIS1	-3.59623	0.000360788	0.00301889	Female
TSIX	-3.5952	0.00036218	0.00302804	Female
TBX21	-3.59451	0.000363115	0.0030346	Female
SLC9A3R1	-3.5939	0.000363942	0.003039	Female
SERPINA1	-3.59362	0.000364315	0.00304087	Female
KCNK6	-3.59279	0.000365444	0.00304904	Female
ARL4D	-3.58939	0.000370097	0.00308404	Female
CD109	-3.5883	0.000371598	0.00309527	Female
EML1	-3.58789	0.000372174	0.00309879	Female
EIF5A2	-3.58724	0.000373069	0.00310265	Female
PROK2	-3.58722	0.000373096	0.00310265	Female
FHL3	-3.58675	0.000373754	0.00310684	Female
SHE	-3.58406	0.000377505	0.00313432	Female
SHANK1	-3.58174	0.000380783	0.00315619	Female
TMEM150B	-3.58128	0.000381435	0.00315911	Female
FAM135B	-3.58028	0.000382854	0.00316817	Female
MVD	-3.57982	0.000383498	0.00317221	Female
IL4R	-3.57912	0.0003845	0.00317896	Female
PCDH9	-3.57903	0.000384629	0.00317896	Female
CXCL9	-3.57881	0.000384949	0.0031803	Female
SNCAIP	-3.57811	0.000385948	0.00318726	Female
LOC284688	-3.57424	0.00039153	0.00322415	Female
B3GNT6	-3.57399	0.000391889	0.0032258	Female
MYO5A	-3.57216	0.000394564	0.00324494	Female
ADORA2A	-3.57043	0.0003971	0.00326206	Female
SMO	-3.57009	0.000397594	0.00326346	Female
ADAMTSL4	-3.56828	0.000400272	0.00328278	Female
NLRX1	-3.56686	0.000402387	0.00329879	Female
ALDH1B1	-3.56643	0.000403034	0.00330276	Female
TBC1D10A	-3.56609	0.000403541	0.00330557	Female
LIF	-3.56586	0.000403872	0.00330695	Female
C2orf54	-3.56541	0.000404559	0.00331092	Female
ST3GAL3	-3.56532	0.000404684	0.00331092	Female
LOC283867	-3.56498	0.000405204	0.00331383	Female
KRT4	-3.56384	0.000406903	0.00332407	Female
NOVA1	-3.56381	0.000406949	0.00332407	Female
C10orf55	-3.56283	0.000408428	0.00333346	Female
SIGLEC14	-3.56008	0.000412605	0.00336484	Female
TREM1	-3.55869	0.000414736	0.0033795	Female
APBB1IP	-3.5578	0.000416092	0.00338782	Female
JAKMIP1	-3.55543	0.000419751	0.00341486	Female
ANXA13	-3.55322	0.000423199	0.00343739	Female
ISG20	-3.55206	0.00042501	0.00344933	Female
RAB3C	-3.55113	0.000426471	0.0034598	Female
ZIC2	-3.54954	0.000428976	0.00347873	Female
SCUBE3	-3.54913	0.00042963	0.00348263	Female
FAM55C	-3.54744	0.000432325	0.00350226	Female
PQLC1	-3.54722	0.000432674	0.0035031	Female
XYLT1	-3.547	0.000433015	0.00350446	Female
ITGA10	-3.54579	0.000434946	0.00351868	Female
ANXA2P2	-3.54531	0.00043573	0.00352221	Female
EHD1	-3.54302	0.000439419	0.00354493	Female
TGFB2	-3.54302	0.000439408	0.00354493	Female
ALDH1A1	-3.54261	0.000440086	0.0035475	Female
ARHGEF17	-3.54197	0.000441111	0.00355435	Female
SAR1A	-3.54122	0.000442332	0.00356135	Female
SLC40A1	-3.53814	0.000447371	0.00360049	Female
FGFBP2	-3.53696	0.00044933	0.00361195	Female
C13orf30	-3.536	0.000450906	0.00362318	Female
MGP	-3.53515	0.00045232	0.00363166	Female
SERPINB9	-3.53427	0.000453795	0.00364206	Female
ACTN1	-3.53265	0.00045649	0.00366078	Female
BOK	-3.53192	0.000457724	0.00366632	Female
LRRC70	-3.53017	0.000460672	0.00368448	Female
FAM110B	-3.52847	0.00046356	0.00370574	Female
ATP1B3	-3.52767	0.000464923	0.00370931	Female
PQLC3	-3.52719	0.000465741	0.0037129	Female
BLVRA	-3.52683	0.000466355	0.00371633	Female
GBP5	-3.52611	0.000467583	0.00372466	Female
STC2	-3.52546	0.000468701	0.00373062	Female
AKAP12	-3.52434	0.000470628	0.00373863	Female
STARD8	-3.52434	0.00047063	0.00373863	Female
ANXA2P1	-3.52405	0.000471139	0.0037412	Female
PREX1	-3.52355	0.000472	0.00374583	Female
CCDC141	-3.52315	0.000472688	0.00374909	Female
LAT	-3.52274	0.000473397	0.00375303	Female
SUSD5	-3.52265	0.000473555	0.00375303	Female
BEND6	-3.52201	0.000474673	0.00375775	Female
JSRP1	-3.52199	0.000474708	0.00375775	Female
ATP1A2	-3.52144	0.000475663	0.00375981	Female
CHST13	-3.52142	0.000475703	0.00375981	Female
PALM2-AKAP2	-3.52131	0.000475897	0.00375981	Female
DST	-3.5188	0.000480287	0.00379006	Female
COMMD6	-3.51789	0.000481887	0.00380076	Female
PNMA2	-3.51661	0.000484147	0.00381605	Female
VPS18	-3.51603	0.000485177	0.00382268	Female
TCF7L1	-3.51288	0.000490799	0.00386397	Female
KLF16	-3.5122	0.000492018	0.00387056	Female
CD74	-3.50983	0.000496308	0.00389522	Female
NACAD	-3.50908	0.000497662	0.00390433	Female
HS3ST3B1	-3.50864	0.00049846	0.00390908	Female
C2orf88	-3.50777	0.000500049	0.0039185	Female
RNF166	-3.50588	0.000503524	0.00394115	Female
CYP27C1	-3.50523	0.00050471	0.00394891	Female
CRELD2	-3.50234	0.000510063	0.00398236	Female
CRTAP	-3.50005	0.000514333	0.0040118	Female
EBF3	-3.49953	0.000515323	0.00401797	Female
SLC19A3	-3.49902	0.000516265	0.00402377	Female
STX1B	-3.49687	0.000520325	0.00405229	Female
[truncated: 3,277 more rows]

## Sheet: CHOL
gene	stat	p	fdr	direction
CA5BP	-8.02794	4.32785e-10	2.84266e-07	Female
XKR6	-7.54454	2.11295e-09	6.20168e-07	Female
GEMIN8	-6.48161	7.28075e-08	7.51014e-06	Female
TMEM136	-6.47422	7.46317e-08	7.60431e-06	Female
DCTN2	-6.33604	1.18583e-07	1.04571e-05	Female
PDGFD	-6.08074	2.79004e-07	2.08617e-05	Female
SMAD3	-6.0017	3.63573e-07	2.52638e-05	Female
TAF1D	-5.99502	3.71786e-07	2.56532e-05	Female
C7orf49	-5.94777	4.35507e-07	2.96341e-05	Female
C11orf49	-5.86583	5.72889e-07	3.70588e-05	Female
NUDT18	-5.78136	7.59834e-07	4.62719e-05	Female
PRDM11	-5.78071	7.61477e-07	4.62719e-05	Female
SPTAN1	-5.70433	9.82751e-07	5.59067e-05	Female
FUNDC1	-5.67483	1.08442e-06	5.97341e-05	Female
MVP	-5.65756	1.14873e-06	6.25754e-05	Female
MFSD5	-5.64343	1.20414e-06	6.48752e-05	Female
C12orf75	-5.64126	1.2129e-06	6.51688e-05	Female
H2AFY2	-5.63986	1.21855e-06	6.52939e-05	Female
HCN4	-5.63019	1.25849e-06	6.67069e-05	Female
PIGC	-5.54756	1.65729e-06	8.2092e-05	Female
GPR108	-5.53754	1.71351e-06	8.42405e-05	Female
ILK	-5.53499	1.72811e-06	8.47461e-05	Female
SH2D3A	-5.53269	1.74135e-06	8.51831e-05	Female
TRIP4	-5.53022	1.75576e-06	8.56749e-05	Female
UBE2A	-5.51445	1.85032e-06	8.85315e-05	Female
VPS18	-5.48605	2.03358e-06	9.5215e-05	Female
DNM1	-5.4761	2.10198e-06	9.72596e-05	Female
PHF21A	-5.44998	2.29251e-06	0.000104169	Female
ARF3	-5.42114	2.52289e-06	0.000111239	Female
PFKP	-5.41118	2.60773e-06	0.000113709	Female
USP3	-5.39173	2.78153e-06	0.000118911	Female
FAM188B	-5.37881	2.90328e-06	0.000122255	Female
SSRP1	-5.35959	3.09437e-06	0.000128107	Female
ITIH5	-5.3571	3.11992e-06	0.000128679	Female
CALM2	-5.35256	3.16722e-06	0.0001303	Female
GALNTL4	-5.34278	3.27151e-06	0.000132922	Female
GBP2	-5.33589	3.34709e-06	0.000134602	Female
ZDHHC13	-5.33105	3.40114e-06	0.000135927	Female
MED22	-5.32235	3.50061e-06	0.000138232	Female
XRCC1	-5.32245	3.49942e-06	0.000138232	Female
TSIX	-5.31733	3.55918e-06	0.000139703	Female
DDX23	-5.3158	3.57732e-06	0.000140135	Female
LEPROTL1	-5.31462	3.59132e-06	0.000140404	Female
MCRS1	-5.30257	3.73737e-06	0.000145248	Female
TRAPPC4	-5.28005	4.0265e-06	0.000153685	Female
MAPRE1	-5.26681	4.20663e-06	0.000158416	Female
RBPMS	-5.26634	4.21315e-06	0.000158416	Female
AACS	-5.25146	4.42555e-06	0.000165139	Female
SEL1L3	-5.22179	4.88112e-06	0.000178043	Female
TMEM147	-5.21322	5.02127e-06	0.000182183	Female
DYRK1B	-5.20112	5.22578e-06	0.000187433	Female
LYPD1	-5.15087	6.16715e-06	0.000212394	Female
BCL9L	-5.14276	6.33403e-06	0.000215179	Female
NDRG3	-5.14504	6.28666e-06	0.000215179	Female
ZRSR2	-5.13896	6.41378e-06	0.000217086	Female
PKN1	-5.1326	6.54943e-06	0.000219326	Female
SEMA6A	-5.129	6.62745e-06	0.000221271	Female
CPNE7	-5.10586	7.15169e-06	0.000237163	Female
RAB9A	-5.10167	7.25102e-06	0.000240053	Female
RIC8B	-5.10032	7.28312e-06	0.00024071	Female
PPP1R14C	-5.0947	7.41908e-06	0.000244382	Female
ARL2	-5.08876	7.56512e-06	0.000248776	Female
KIAA1826	-5.08644	7.62307e-06	0.000250263	Female
MFSD10	-5.07893	7.81363e-06	0.000255666	Female
ELOVL7	-5.0637	8.21442e-06	0.000264921	Female
SMARCD1	-5.06017	8.30995e-06	0.000267018	Female
MADD	-5.05647	8.41157e-06	0.000268965	Female
DPF2	-5.05575	8.43157e-06	0.000269167	Female
GOLGA7B	-5.05018	8.587e-06	0.000271922	Female
BTBD2	-5.04696	8.67831e-06	0.000273931	Female
LOC441204	-5.04449	8.74892e-06	0.000275717	Female
CS	-5.02868	9.21452e-06	0.00028581	Female
TNFAIP2	-5.02904	9.20361e-06	0.00028581	Female
SLC38A1	-5.0249	9.32954e-06	0.000288468	Female
GSK3A	-5.02318	9.38223e-06	0.000289641	Female
CD58	-5.01731	9.56437e-06	0.000292897	Female
SYT13	-5.01592	9.6081e-06	0.000292935	Female
CCDC123	-5.01268	9.71059e-06	0.000295145	Female
SMARCC2	-5.00988	9.80018e-06	0.000297408	Female
SH3GLB2	-4.99744	1.02078e-05	0.000307929	Female
TAX1BP3	-4.99739	1.02095e-05	0.000307929	Female
ARHGEF18	-4.9918	1.0398e-05	0.000311228	Female
ATP1A1	-4.98917	1.04881e-05	0.000313447	Female
PARP8	-4.97835	1.08659e-05	0.000320954	Female
TMEM109	-4.97731	1.0903e-05	0.00032145	Female
ANO9	-4.97183	1.11003e-05	0.000326288	Female
PFDN1	-4.96533	1.1339e-05	0.000332313	Female
WDR73	-4.96344	1.14093e-05	0.00033338	Female
GLIS2	-4.96123	1.14921e-05	0.000335299	Female
HDAC7	-4.95794	1.16163e-05	0.000336926	Female
C18orf10	-4.95492	1.17316e-05	0.000339267	Female
SLC39A13	-4.94741	1.20229e-05	0.000345658	Female
PCNXL3	-4.94632	1.20662e-05	0.000346395	Female
IFT140	-4.94247	1.22188e-05	0.000349758	Female
SPINT1	-4.93553	1.2499e-05	0.000356336	Female
C11orf57	-4.93208	1.26405e-05	0.000357109	Female
TMEM51	-4.93182	1.26514e-05	0.000357109	Female
SRCAP	-4.91727	1.3267e-05	0.000371646	Female
DYNLRB1	-4.9027	1.39127e-05	0.000384919	Female
RIC8A	-4.90225	1.39333e-05	0.000384919	Female
WWC1	-4.90218	1.39366e-05	0.000384919	Female
G6PC3	-4.90016	1.40286e-05	0.000386559	Female
ETAA1	-4.8958	1.42293e-05	0.000389427	Female
FAM160B2	-4.89515	1.42596e-05	0.000389427	Female
LAMA5	-4.89475	1.4278e-05	0.000389427	Female
CTSC	-4.87851	1.50541e-05	0.000406648	Female
ZBTB45	-4.87338	1.53082e-05	0.000410691	Female
DCTPP1	-4.86665	1.56473e-05	0.000416378	Female
FHOD3	-4.8597	1.60057e-05	0.000423053	Female
BHLHE41	-4.8543	1.62892e-05	0.000428068	Female
SARM1	-4.84583	1.67447e-05	0.000434281	Female
PRKD2	-4.84335	1.68803e-05	0.000436777	Female
TUBG2	-4.83562	1.73097e-05	0.000446713	Female
TMEM132A	-4.83211	1.75084e-05	0.000451248	Female
ZNF512	-4.81876	1.82851e-05	0.000468808	Female
GTF2F1	-4.81417	1.856e-05	0.000474619	Female
NPRL3	-4.81313	1.86226e-05	0.000474985	Female
KCNF1	-4.80358	1.92091e-05	0.000483053	Female
IGSF3	-4.80042	1.94071e-05	0.000485549	Female
CAPN1	-4.79884	1.95071e-05	0.000486194	Female
ZNF490	-4.79916	1.94872e-05	0.000486194	Female
ZNF629	-4.79645	1.96589e-05	0.000488738	Female
SMARCA4	-4.79173	1.99627e-05	0.000494417	Female
RHOC	-4.79004	2.00722e-05	0.000495257	Female
XIST	-4.78922	2.01256e-05	0.000495699	Female
C20orf118	-4.78501	2.04026e-05	0.000499751	Female
NCS1	-4.77469	2.10968e-05	0.000512817	Female
TSSK6	-4.77319	2.12e-05	0.000514424	Female
TMEM127	-4.76835	2.15352e-05	0.000520897	Female
ABCA3	-4.76684	2.16406e-05	0.000522162	Female
GLIS3	-4.76386	2.18509e-05	0.000525581	Female
SLC22A5	-4.7637	2.18625e-05	0.000525581	Female
ZBED5	-4.76396	2.18436e-05	0.000525581	Female
SLC10A3	-4.76257	2.1942e-05	0.000526431	Female
UNC45A	-4.7608	2.20684e-05	0.000527949	Female
KIAA1967	-4.75726	2.23229e-05	0.000532703	Female
ME3	-4.75691	2.23483e-05	0.000532703	Female
SPRYD3	-4.7547	2.25088e-05	0.000535229	Female
NR2C2AP	-4.75207	2.27018e-05	0.000537221	Female
DLG3	-4.74702	2.30762e-05	0.000544769	Female
CDK16	-4.74638	2.31236e-05	0.000545235	Female
DMWD	-4.73568	2.39387e-05	0.000561089	Female
LOC151009	-4.73288	2.41567e-05	0.000565525	Female
ALDOA	-4.72521	2.47637e-05	0.000578358	Female
HIP1R	-4.72453	2.48177e-05	0.000578934	Female
CLIP2	-4.72184	2.50346e-05	0.00058261	Female
AAK1	-4.71987	2.51945e-05	0.000585639	Female
RTDR1	-4.71658	2.54646e-05	0.000589826	Female
PKM2	-4.70982	2.60267e-05	0.000599609	Female
RAB11FIP5	-4.70812	2.61701e-05	0.000601209	Female
IGBP1	-4.70734	2.62359e-05	0.000601517	Female
DDA1	-4.70208	2.66861e-05	0.000607386	Female
GABBR1	-4.70307	2.6601e-05	0.000607386	Female
KSR2	-4.70224	2.66717e-05	0.000607386	Female
UBE2Z	-4.69776	2.70606e-05	0.000613072	Female
HKR1	-4.69405	2.73868e-05	0.000618144	Female
HMGN4	-4.69223	2.75485e-05	0.000618144	Female
MPP6	-4.69412	2.73805e-05	0.000618144	Female
GRAMD1B	-4.68701	2.80169e-05	0.000623954	Female
KDM5C	-4.68326	2.83581e-05	0.000628477	Female
RELB	-4.68215	2.8459e-05	0.000629524	Female
SFXN3	-4.67096	2.95053e-05	0.000649743	Female
B4GALNT4	-4.66898	2.96942e-05	0.00065269	Female
DNAJB2	-4.66581	2.99995e-05	0.000657681	Female
FAM131C	-4.66598	2.99831e-05	0.000657681	Female
ZDHHC1	-4.65696	3.08674e-05	0.000675204	Female
DAPK3	-4.65303	3.12607e-05	0.000682288	Female
MAP1S	-4.6533	3.12339e-05	0.000682288	Female
TMEM61	-4.65128	3.14379e-05	0.000685395	Female
CCDC103	-4.64884	3.16857e-05	0.000688684	Female
ORAI2	-4.64808	3.17635e-05	0.000688684	Female
CLCNKA	-4.64635	3.19416e-05	0.000690961	Female
TBC1D10B	-4.6433	3.22567e-05	0.000695103	Female
PIH1D2	-4.64231	3.23591e-05	0.000695455	Female
LPAR2	-4.64037	3.25626e-05	0.000697542	Female
CSNK2A1	-4.63905	3.27009e-05	0.000699039	Female
TICAM1	-4.62994	3.36738e-05	0.000716661	Female
KCTD17	-4.6281	3.38735e-05	0.000719355	Female
CXorf23	-4.62134	3.46182e-05	0.000730436	Female
BCL2L1	-4.61909	3.48698e-05	0.000734957	Female
HOOK2	-4.61439	3.5401e-05	0.000742639	Female
ANXA2P3	-4.6082	3.6112e-05	0.000755805	Female
PPAP2C	-4.60773	3.61664e-05	0.000755805	Female
TTC39A	-4.60547	3.64307e-05	0.00075891	Female
EIF2S3	-4.60487	3.65009e-05	0.000759567	Female
SPATS2	-4.59687	3.74506e-05	0.000776775	Female
TEAD4	-4.59658	3.74859e-05	0.000776775	Female
ASPHD1	-4.59513	3.76613e-05	0.000779588	Female
MUS81	-4.59261	3.79663e-05	0.00078425	Female
EPHA6	-4.58878	3.84361e-05	0.000792456	Female
ATP6V1H	-4.58736	3.8612e-05	0.000793587	Female
FA2H	-4.5869	3.86693e-05	0.00079377	Female
PRKAG1	-4.58372	3.90654e-05	0.00080023	Female
C15orf17	-4.58269	3.9195e-05	0.000801964	Female
NT5C3	-4.58203	3.92784e-05	0.000802087	Female
SPATA20	-4.58073	3.94431e-05	0.000804615	Female
UNC5CL	-4.57932	3.96211e-05	0.000806572	Female
SPNS2	-4.57809	3.97785e-05	0.000808103	Female
C4orf36	-4.57369	4.03429e-05	0.000817879	Female
VPS24	-4.57256	4.04899e-05	0.000820014	Female
DDR1	-4.57221	4.05348e-05	0.000820079	Female
SPATA12	-4.57123	4.06624e-05	0.000821814	Female
LOC283267	-4.56996	4.08285e-05	0.000824324	Female
KHDRBS1	-4.5651	4.147e-05	0.000835561	Female
HS3ST1	-4.5598	4.21804e-05	0.00084727	Female
SPIN2B	-4.5529	4.31241e-05	0.000862031	Female
FAM50A	-4.54917	4.3642e-05	0.000870406	Female
SARNP	-4.54923	4.36337e-05	0.000870406	Female
IFT52	-4.53688	4.53926e-05	0.000899844	Female
SLC35F3	-4.53288	4.59776e-05	0.000908693	Female
GAB2	-4.52519	4.71224e-05	0.000924426	Female
TBC1D25	-4.52131	4.77111e-05	0.000934501	Female
GPSM1	-4.51766	4.82714e-05	0.000939453	Female
CSNK1G1	-4.51463	4.87406e-05	0.000946184	Female
LRRC49	-4.51123	4.9273e-05	0.000951695	Female
PHF15	-4.51211	4.91349e-05	0.000951695	Female
RAVER1	-4.51184	4.91774e-05	0.000951695	Female
PLCD3	-4.5094	4.95621e-05	0.000954592	Female
SIPA1L3	-4.50765	4.98402e-05	0.00095901	Female
RGS17	-4.5036	5.04885e-05	0.000970534	Female
PIGG	-4.50296	5.05931e-05	0.000971595	Female
GUCA2A	-4.5002	5.10403e-05	0.000976259	Female
NIPA1	-4.49993	5.10842e-05	0.000976259	Female
C2orf24	-4.49596	5.17359e-05	0.000987753	Female
ZNF337	-4.49343	5.21558e-05	0.000994804	Female
GATS	-4.49246	5.23179e-05	0.000995987	Female
ITGAM	-4.49245	5.23191e-05	0.000995987	Female
DSCAML1	-4.49105	5.25537e-05	0.000999485	Female
KLC2	-4.48926	5.28548e-05	0.00100424	Female
SLFN13	-4.48503	5.35716e-05	0.00101394	Female
SMARCD3	-4.48283	5.39499e-05	0.00101914	Female
PITX1	-4.4818	5.41273e-05	0.00102151	Female
TRIM47	-4.48123	5.42257e-05	0.00102238	Female
RNF44	-4.47924	5.45712e-05	0.00102595	Female
CIZ1	-4.47741	5.48903e-05	0.001029	Female
DAGLA	-4.47744	5.48846e-05	0.001029	Female
ASNA1	-4.47218	5.58126e-05	0.00104231	Female
LOC100286793	-4.46867	5.64404e-05	0.00104906	Female
BRE	-4.46738	5.66737e-05	0.0010507	Female
SPPL3	-4.46521	5.70661e-05	0.0010547	Female
KCNK5	-4.4646	5.71777e-05	0.00105577	Female
KIF13B	-4.46296	5.74768e-05	0.00105931	Female
CRMP1	-4.46216	5.76233e-05	0.00106002	Female
NCK2	-4.46002	5.80186e-05	0.0010653	Female
CD2BP2	-4.45202	5.95146e-05	0.00108609	Female
POLG	-4.45037	5.98287e-05	0.00108837	Female
FANCF	-4.44815	6.02517e-05	0.00109318	Female
LASS5	-4.44752	6.03733e-05	0.00109318	Female
MTMR2	-4.44751	6.03755e-05	0.00109318	Female
MKKS	-4.4466	6.05497e-05	0.0010944	Female
FSIP1	-4.44613	6.06404e-05	0.00109504	Female
FSCN2	-4.44394	6.10655e-05	0.00109968	Female
KIAA1731	-4.44262	6.13227e-05	0.00110028	Female
LOC100128292	-4.4432	6.12089e-05	0.00110028	Female
C12orf41	-4.44106	6.16271e-05	0.00110474	Female
RAB25	-4.43993	6.18479e-05	0.00110769	Female
GAL3ST1	-4.43662	6.25028e-05	0.0011184	Female
B9D2	-4.43396	6.30344e-05	0.00112484	Female
XRCC4	-4.4325	6.33275e-05	0.00112802	Female
TMEM163	-4.43155	6.35188e-05	0.0011304	Female
MED17	-4.4301	6.38117e-05	0.00113443	Female
CCDC93	-4.42273	6.5325e-05	0.00115316	Female
FOXD4L1	-4.42013	6.58674e-05	0.00116022	Female
LAD1	-4.41996	6.59021e-05	0.00116022	Female
TIGD5	-4.42048	6.57927e-05	0.00116022	Female
ARHGAP1	-4.41727	6.64674e-05	0.00116704	Female
RHBDF2	-4.4162	6.66947e-05	0.00116894	Female
BDKRB1	-4.41178	6.76356e-05	0.00118122	Female
KCTD13	-4.4108	6.78471e-05	0.00118263	Female
KIAA0649	-4.41057	6.78969e-05	0.00118263	Female
PPAPDC1B	-4.40698	6.86746e-05	0.00119406	Female
MYO1C	-4.40435	6.92512e-05	0.00119879	Female
NRM	-4.40158	6.98612e-05	0.00120722	Female
PLIN3	-4.39819	7.06173e-05	0.00121815	Female
ELMO3	-4.39641	7.10175e-05	0.00122184	Female
SIRT6	-4.39565	7.11876e-05	0.00122369	Female
RAB11A	-4.39518	7.12945e-05	0.00122446	Female
ZNF233	-4.39283	7.18268e-05	0.00123038	Female
WNT2B	-4.39077	7.22973e-05	0.00123543	Female
CD59	-4.38377	7.39192e-05	0.00125855	Female
ATP6V1E2	-4.38322	7.40501e-05	0.00125968	Female
CBX5	-4.37942	7.49455e-05	0.00126988	Female
CD151	-4.38035	7.47267e-05	0.00126988	Female
DAB2IP	-4.37965	7.48907e-05	0.00126988	Female
HDHD1A	-4.37931	7.49726e-05	0.00126988	Female
ANKRD52	-4.37896	7.50543e-05	0.00127017	Female
PTPN9	-4.37551	7.58799e-05	0.001281	Female
ATP13A1	-4.37274	7.65482e-05	0.0012888	Female
PSORS1C1	-4.37017	7.71748e-05	0.0012976	Female
SNHG1	-4.36978	7.7269e-05	0.0012976	Female
C12orf10	-4.36579	7.82526e-05	0.00131188	Female
C9orf125	-4.36603	7.81917e-05	0.00131188	Female
C9orf122	-4.36191	7.92174e-05	0.00132467	Female
LHFPL5	-4.36159	7.92991e-05	0.00132491	Female
S100A11	-4.35402	8.12206e-05	0.00134785	Female
DNER	-4.35357	8.13348e-05	0.00134861	Female
CYTSB	-4.35117	8.1954e-05	0.00135605	Female
RABL5	-4.35081	8.20476e-05	0.00135605	Female
ZNF283	-4.35112	8.19671e-05	0.00135605	Female
RASSF7	-4.34985	8.22975e-05	0.00135884	Female
SGPP2	-4.3491	8.24935e-05	0.00135935	Female
WHSC1L1	-4.34894	8.25355e-05	0.00135935	Female
CLIC1	-4.34717	8.29981e-05	0.00136392	Female
C20orf199	-4.3462	8.32526e-05	0.00136569	Female
KRTAP5-1	-4.34608	8.32839e-05	0.00136569	Female
SCTR	-4.34013	8.48651e-05	0.00138611	Female
CD97	-4.33755	8.55597e-05	0.00139282	Female
SEZ6L2	-4.3359	8.60071e-05	0.00139779	Female
STK39	-4.33613	8.59444e-05	0.00139779	Female
TMEM106C	-4.33288	8.68308e-05	0.00140826	Female
GTPBP2	-4.33004	8.76141e-05	0.00141688	Female
KAAG1	-4.32815	8.81369e-05	0.00142417	Female
C11orf93	-4.32766	8.82725e-05	0.00142519	Female
CHMP4B	-4.32297	8.95899e-05	0.00143669	Female
ABI2	-4.31749	9.11515e-05	0.00145495	Female
MNX1	-4.31548	9.17325e-05	0.00146066	Female
SPAG1	-4.31559	9.1701e-05	0.00146066	Female
NFKBIL1	-4.31259	9.25719e-05	0.00147284	Female
BBC3	-4.31194	9.27628e-05	0.00147423	Female
OBFC2B	-4.31178	9.28091e-05	0.00147423	Female
H2AFB1	-4.31121	9.29762e-05	0.00147569	Female
NT5C	-4.31053	9.31741e-05	0.00147764	Female
HES4	-4.30935	9.35216e-05	0.00148076	Female
HIF1AN	-4.30805	9.39066e-05	0.00148446	Female
PPHLN1	-4.30812	9.3884e-05	0.00148446	Female
VPS37C	-4.30471	9.49e-05	0.00149447	Female
NOXA1	-4.30179	9.57769e-05	0.00150315	Female
TCOF1	-4.30077	9.6084e-05	0.00150557	Female
STX4	-4.29985	9.63624e-05	0.00150873	Female
C4orf48	-4.29753	9.70698e-05	0.00151739	Female
MFF	-4.29768	9.70238e-05	0.00151739	Female
TBC1D22B	-4.29696	9.72446e-05	0.00151892	Female
KIAA1310	-4.29218	9.87183e-05	0.00153462	Female
PAQR5	-4.29106	9.90677e-05	0.00153884	Female
RALB	-4.28923	9.96399e-05	0.0015465	Female
CCDC46	-4.28344	0.000101473	0.00157	Female
PYCARD	-4.28033	0.00010247	0.00158169	Female
NUAK2	-4.27905	0.000102883	0.00158558	Female
NEURL3	-4.27637	0.000103754	0.00159575	Female
PACS1	-4.27559	0.00010401	0.00159575	Female
RRAGB	-4.27608	0.000103848	0.00159575	Female
VWC2	-4.27383	0.000104588	0.00160181	Female
SMYD5	-4.27291	0.000104891	0.00160519	Female
SRRM3	-4.27117	0.000105465	0.00160773	Female
STK11IP	-4.27153	0.000105345	0.00160773	Female
MMP11	-4.27056	0.000105666	0.00160862	Female
PCNXL2	-4.2705	0.000105687	0.00160862	Female
ATXN2L	-4.27002	0.000105848	0.00160982	Female
FNTA	-4.26818	0.000106462	0.00161271	Female
GINS3	-4.26798	0.000106528	0.00161271	Female
KIFC3	-4.26818	0.000106461	0.00161271	Female
RAB40AL	-4.26783	0.000106577	0.00161271	Female
UBASH3B	-4.26748	0.000106694	0.00161271	Female
KCNJ11	-4.26099	0.000108894	0.00163606	Female
IFNGR2	-4.26032	0.000109122	0.00163808	Female
DCTN5	-4.25508	0.000110934	0.00165894	Female
PCDP1	-4.25343	0.000111507	0.00166372	Female
PSMC3IP	-4.25353	0.000111473	0.00166372	Female
NPEPL1	-4.25315	0.000111605	0.00166393	Female
RAI1	-4.24688	0.000113825	0.00168807	Female
RBCK1	-4.24542	0.000114346	0.00169069	Female
RIPK2	-4.24544	0.000114341	0.00169069	Female
AP1G2	-4.24475	0.000114587	0.00169297	Female
NGRN	-4.2441	0.000114823	0.00169519	Female
TTF1	-4.24024	0.000116219	0.00171323	Female
LRRC37B	-4.23953	0.00011648	0.00171405	Female
NEO1	-4.23937	0.000116536	0.00171405	Female
AQP1	-4.23722	0.000117326	0.00172051	Female
DNMT3A	-4.23778	0.000117121	0.00172051	Female
RAB35	-4.23749	0.000117227	0.00172051	Female
GNPDA1	-4.23635	0.000117647	0.00172395	Female
MICALL2	-4.23472	0.000118251	0.00173079	Female
EXOC7	-4.23399	0.000118522	0.00173288	Female
PPP2R3A	-4.23357	0.000118677	0.00173387	Female
LRRN2	-4.23262	0.00011903	0.00173773	Female
FBXL2	-4.23125	0.000119543	0.00174392	Female
BAIAP2L2	-4.22842	0.000120608	0.00175425	Female
HIST1H4H	-4.22635	0.000121393	0.00176047	Female
HKDC1	-4.22648	0.000121342	0.00176047	Female
C10orf28	-4.22605	0.000121506	0.00176081	Female
FZD1	-4.22503	0.000121896	0.00176127	Female
HN1L	-4.22554	0.0001217	0.00176127	Female
ZNF319	-4.22522	0.00012182	0.00176127	Female
SGSH	-4.22207	0.00012303	0.00177505	Female
UBL4A	-4.2211	0.000123405	0.00177914	Female
ANKS3	-4.22025	0.000123733	0.00178257	Female
FXYD2	-4.21959	0.000123988	0.00178364	Female
TTC9C	-4.21666	0.000125133	0.00179747	Female
PDCL3	-4.21593	0.000125418	0.00179951	Female
PRMT2	-4.21583	0.000125458	0.00179951	Female
OTUB1	-4.2149	0.000125824	0.00180214	Female
SLC25A6	-4.20993	0.000127796	0.0018213	Female
WIZ	-4.21018	0.000127695	0.0018213	Female
ILDR1	-4.20932	0.00012804	0.00182325	Female
MGC12982	-4.20862	0.000128322	0.00182594	Female
CMTM3	-4.20743	0.000128798	0.00183006	Female
C10orf35	-4.20323	0.000130502	0.00185027	Female
LCE1C	-4.2012	0.000131334	0.00185938	Female
REEP4	-4.2005	0.000131619	0.00186208	Female
ZNF48	-4.2002	0.000131744	0.00186251	Female
UBE2Q2	-4.19975	0.000131929	0.00186378	Female
PAX8	-4.19943	0.00013206	0.00186429	Female
CTPS2	-4.19874	0.000132345	0.00186697	Female
ANXA5	-4.19104	0.000135569	0.00190298	Female
HOMER3	-4.19103	0.000135575	0.00190298	Female
STXBP2	-4.19076	0.000135688	0.00190321	Female
AXIN1	-4.18983	0.000136084	0.00190605	Female
CNNM1	-4.18992	0.000136043	0.00190605	Female
DBN1	-4.18915	0.000136372	0.00190872	Female
UTP14A	-4.18719	0.000137211	0.00191909	Female
C9orf116	-4.18635	0.000137569	0.00192157	Female
LOC349196	-4.18507	0.000138122	0.00192773	Female
SYNGR1	-4.17853	0.000140971	0.00196228	Female
HIST2H4A	-4.17589	0.000142137	0.00197674	Female
SCAND2	-4.17446	0.000142774	0.0019842	Female
TBC1D22A	-4.17186	0.000143936	0.00199754	Female
KIAA1609	-4.17136	0.000144158	0.00199779	Female
TSPAN17	-4.1708	0.00014441	0.00199988	Female
MORF4L1	-4.16802	0.000145666	0.0020116	Female
ACOT9	-4.16717	0.000146056	0.00201305	Female
C19orf22	-4.16733	0.000145984	0.00201305	Female
PRKX	-4.16712	0.000146078	0.00201305	Female
ABCC4	-4.16422	0.000147406	0.00202785	Female
GPRIN1	-4.15985	0.000149425	0.00204853	Female
GRID1	-4.15875	0.000149938	0.00205329	Female
KIAA0802	-4.15562	0.00015141	0.00206769	Female
CEND1	-4.15454	0.000151919	0.00207176	Female
B3GNT3	-4.15401	0.000152169	0.0020723	Female
FBXL19	-4.15423	0.000152065	0.0020723	Female
C1orf126	-4.14883	0.000154646	0.00209731	Female
STX3	-4.14745	0.000155311	0.00210198	Female
RPS4X	-4.14608	0.000155975	0.00210807	Female
IRAK1	-4.14274	0.000157605	0.00212427	Female
VN1R1	-4.13927	0.000159313	0.00213849	Female
SCAMP3	-4.13762	0.000160132	0.00214655	Female
STRN4	-4.13683	0.000160528	0.00214907	Female
MTA3	-4.13598	0.000160952	0.00215022	Female
FUS	-4.13366	0.00016212	0.00216288	Female
ZNF165	-4.13115	0.000163386	0.00217682	Female
TCTN2	-4.12919	0.000164388	0.00218573	Female
USP37	-4.12655	0.000165743	0.00220226	Female
NMB	-4.1251	0.00016649	0.0022067	Female
VSIG10	-4.12503	0.000166526	0.0022067	Female
RNF19A	-4.12297	0.000167593	0.00221934	Female
FAM81A	-4.12228	0.000167957	0.00222116	Female
EEF1A2	-4.12004	0.000169129	0.00223216	Female
SFRS8	-4.11824	0.000170077	0.00224016	Female
MTNR1A	-4.11713	0.000170661	0.00224635	Female
C1orf183	-4.11631	0.000171098	0.00224909	Female
GYS1	-4.11471	0.000171951	0.00225729	Female
SPINT2	-4.11332	0.000172692	0.00226098	Female
SLC5A10	-4.11187	0.000173472	0.00226817	Female
MPZL1	-4.10924	0.000174894	0.00228334	Female
PARP3	-4.10847	0.000175315	0.00228619	Female
GCNT3	-4.10736	0.00017592	0.00229103	Female
DAND5	-4.1057	0.000176824	0.00230129	Female
EXD3	-4.10497	0.000177227	0.00230301	Female
PHTF1	-4.1049	0.000177267	0.00230301	Female
VASP	-4.10371	0.00017792	0.00230944	Female
PDDC1	-4.10311	0.000178254	0.00231225	Female
ANXA11	-4.10211	0.000178804	0.00231389	Female
TUBA1A	-4.10228	0.000178712	0.00231389	Female
SOX11	-4.10132	0.000179247	0.00231596	Female
DEAF1	-4.10003	0.000179961	0.00232214	Female
LRRC1	-4.09622	0.000182099	0.00234357	Female
PARD6B	-4.09333	0.00018374	0.00236315	Female
FAM189B	-4.09204	0.000184475	0.0023687	Female
UNC13D	-4.09173	0.000184654	0.0023687	Female
ZNF646	-4.09082	0.000185176	0.00237385	Female
AACSL	-4.08854	0.000186486	0.00238753	Female
TAGLN2	-4.08813	0.000186726	0.00238905	Female
OBFC1	-4.08693	0.000187417	0.00239477	Female
C9orf86	-4.08638	0.000187738	0.00239731	Female
MYEF2	-4.08432	0.000188938	0.00240952	Female
C6orf168	-4.08337	0.000189496	0.00241349	Female
PTGFRN	-4.0796	0.000191724	0.00243714	Female
N4BP3	-4.07928	0.000191909	0.00243792	Female
HARS2	-4.07331	0.000195493	0.00247227	Female
NFKBIE	-4.07379	0.000195203	0.00247227	Female
RRN3P3	-4.07368	0.00019527	0.00247227	Female
MEGF8	-4.07046	0.000197223	0.00249254	Female
UBE2I	-4.07009	0.000197447	0.00249376	Female
GPR137	-4.06758	0.000198988	0.00251161	Female
ANXA4	-4.06716	0.000199242	0.00251299	Female
C11orf41	-4.06697	0.000199362	0.00251299	Female
SLC34A2	-4.06678	0.00019948	0.00251299	Female
ADCY6	-4.06656	0.000199612	0.00251304	Female
CTTNBP2NL	-4.06489	0.000200647	0.0025217	Female
PTHLH	-4.06483	0.000200684	0.0025217	Female
RANBP3	-4.06432	0.000201004	0.0025241	Female
ALOXE3	-4.06142	0.000202809	0.0025419	Female
PRPF40B	-4.06146	0.000202788	0.0025419	Female
CWC27	-4.06024	0.000203553	0.0025496	Female
CFL1	-4.0598	0.000203831	0.00255146	Female
GDI1	-4.05899	0.000204342	0.0025546	Female
MGC2752	-4.05537	0.000206637	0.00258001	Female
TREM2	-4.05556	0.000206514	0.00258001	Female
RBBP8	-4.05368	0.000207723	0.00259028	Female
VPS11	-4.05053	0.000209751	0.00261061	Female
GRP	-4.04931	0.000210545	0.00261743	Female
OFD1	-4.04725	0.000211887	0.00263054	Female
C11orf73	-4.04597	0.000212723	0.00263925	Female
C4orf14	-4.04536	0.000213123	0.00264253	Female
HAGHL	-4.04218	0.000215229	0.00266361	Female
NRSN2	-4.03967	0.000216902	0.00267758	Female
CSGALNACT1	-4.03525	0.000219874	0.00270916	Female
TP53BP1	-4.03091	0.000222838	0.00273539	Female
CTSH	-4.0304	0.000223188	0.00273612	Female
GAS5	-4.03027	0.000223278	0.00273612	Female
EPB49	-4.02952	0.000223795	0.0027395	Female
TMCC2	-4.02941	0.000223868	0.0027395	Female
INPPL1	-4.02308	0.00022828	0.00277621	Female
LAT2	-4.02175	0.000229218	0.00278417	Female
RELA	-4.02085	0.000229854	0.00278571	Female
SEPT9	-4.02137	0.000229488	0.00278571	Female
SF3A2	-4.01637	0.000233045	0.00281847	Female
RAD51L3	-4.01525	0.000233849	0.00282472	Female
CPNE9	-4.01474	0.000234218	0.00282744	Female
RBMS2	-4.01199	0.000236211	0.00284975	Female
ZNF85	-4.01001	0.000237654	0.0028619	Female
MYL6B	-4.00942	0.000238082	0.00286529	Female
ZSWIM4	-4.00812	0.000239038	0.00287503	Female
SKP1	-4.00713	0.000239766	0.00288202	Female
CASP4	-4.00649	0.000240242	0.00288599	Female
TSG101	-4.00578	0.000240764	0.00289049	Female
PHLDB1	-4.00477	0.000241511	0.00289592	Female
C20orf117	-4.00419	0.000241945	0.00289936	Female
LOXL4	-4.001	0.000244331	0.00292261	Female
DBNDD2	-3.99995	0.000245117	0.00292845	Female
PWWP2B	-3.99635	0.000247847	0.00295388	Female
ABR	-3.99123	0.000251778	0.00299347	Female
PTPN14	-3.99028	0.000252508	0.00299673	Female
USH1C	-3.9904	0.000252416	0.00299673	Female
CEACAM7	-3.98965	0.000253002	0.00299896	Female
RAB40A	-3.98738	0.000254767	0.00301443	Female
DTX3	-3.98243	0.000258667	0.00305438	Female
ZNF446	-3.98211	0.00025892	0.00305438	Female
PRSS16	-3.98187	0.00025911	0.0030548	Female
ORMDL2	-3.98167	0.000259273	0.00305488	Female
C1orf113	-3.97982	0.000260752	0.00307047	Female
HNRNPA1L2	-3.9776	0.000262529	0.0030877	Female
LOC388796	-3.97764	0.000262499	0.0030877	Female
KIAA0892	-3.97607	0.000263763	0.00310036	Female
LARP6	-3.97448	0.000265055	0.00311368	Female
CHRNA6	-3.97317	0.000266118	0.00312157	Female
DNAJC9	-3.97201	0.000267073	0.00312992	Female
RASGRF2	-3.9717	0.000267324	0.00313098	Female
APPL2	-3.97044	0.000268359	0.00313436	Female
EPS15L1	-3.97029	0.000268484	0.00313436	Female
HNRPDL	-3.97073	0.000268117	0.00313436	Female
KIF12	-3.97037	0.000268415	0.00313436	Female
NAP1L1	-3.96753	0.000270765	0.00315251	Female
SLC4A3	-3.96685	0.000271327	0.00315532	Female
LRRC56	-3.96614	0.000271922	0.00316037	Female
DDX27	-3.96423	0.000273518	0.00317517	Female
DYX1C1	-3.96313	0.000274438	0.00318396	Female
NCRNA00219	-3.9614	0.000275898	0.0031915	Female
TP53I3	-3.96143	0.000275872	0.0031915	Female
ATN1	-3.96068	0.000276507	0.00319665	Female
IKBKB	-3.96042	0.000276729	0.00319734	Female
FLNA	-3.95574	0.000280722	0.00323208	Female
MATR3	-3.95477	0.000281555	0.0032341	Female
NAA40	-3.95488	0.000281461	0.0032341	Female
FAM116B	-3.95428	0.000281981	0.0032371	Female
IDUA	-3.95342	0.000282724	0.00324145	Female
TAP1	-3.95137	0.000284502	0.00325627	Female
WARS2	-3.95053	0.000285231	0.00325736	Female
NCRNA00095	-3.94856	0.000286957	0.00326758	Female
ANXA2	-3.9477	0.000287715	0.00327236	Female
EFTUD1	-3.94668	0.000288614	0.00328069	Female
C6orf27	-3.94436	0.000290666	0.00330211	Female
ZNF317	-3.94369	0.000291259	0.00330502	Female
COL9A1	-3.94128	0.000293417	0.0033234	Female
MGC57346	-3.94075	0.000293893	0.0033234	Female
PRDM4	-3.94087	0.000293784	0.0033234	Female
TMED3	-3.94104	0.000293633	0.0033234	Female
HCFC1	-3.94043	0.000294179	0.00332473	Female
CSNK1G2	-3.93927	0.000295227	0.00333275	Female
RBMX2	-3.93845	0.000295966	0.00333917	Female
C16orf88	-3.93589	0.000298288	0.0033615	Female
LOC388152	-3.93353	0.000300445	0.00338388	Female
SAMD1	-3.93169	0.000302143	0.00339627	Female
WDR34	-3.93122	0.000302577	0.00339816	Female
TSPAN15	-3.93085	0.000302916	0.00339907	Female
ZIC2	-3.93037	0.000303358	0.0034011	Female
STX18	-3.92987	0.000303828	0.00340443	Female
CAPNS1	-3.92965	0.000304034	0.00340481	Female
BACE2	-3.92675	0.000306734	0.00342918	Female
PLCD4	-3.92565	0.000307762	0.00343676	Female
TCP11L1	-3.92324	0.000310035	0.00346018	Female
PXN	-3.92283	0.000310424	0.00346255	Female
MAEA	-3.92225	0.00031098	0.0034668	Female
TRPC6	-3.92044	0.0003127	0.00348103	Female
PTGES3	-3.92012	0.000313	0.00348142	Female
NPHP1	-3.9196	0.000313502	0.00348453	Female
MED7	-3.91768	0.000315346	0.00349565	Female
NRARP	-3.91742	0.000315589	0.00349637	Female
TBCB	-3.91626	0.00031671	0.00350484	Female
FCGBP	-3.91546	0.000317484	0.00350946	Female
LRP10	-3.91207	0.000320779	0.00353991	Female
MZF1	-3.9115	0.000321338	0.00354409	Female
EEF1E1	-3.91108	0.000321756	0.00354671	Female
MAFK	-3.91059	0.000322233	0.00354997	Female
FAM117B	-3.91034	0.000322481	0.00355073	Female
AGPAT6	-3.90893	0.000323869	0.00356201	Female
NFU1	-3.90696	0.000325817	0.00357944	Female
CYB561D1	-3.90668	0.000326094	0.00358048	Female
ZNF213	-3.90614	0.000326632	0.00358239	Female
PFKM	-3.90389	0.000328879	0.00360502	Female
MOBKL2A	-3.90367	0.000329103	0.00360547	Female
ARMC9	-3.90287	0.000329901	0.0036122	Female
HNRNPUL2	-3.90221	0.000330564	0.00361342	Female
HERC6	-3.902	0.000330777	0.00361374	Female
CIR1	-3.90105	0.000331732	0.00362015	Female
PPP4R1	-3.89946	0.000333345	0.00363466	Female
HUNK	-3.89909	0.000333727	0.00363552	Female
SPP1	-3.89894	0.00033388	0.00363552	Female
LOC90784	-3.89838	0.000334445	0.00363811	Female
LOC100130933	-3.8975	0.000335339	0.00364262	Female
HCP5	-3.897	0.000335857	0.00364292	Female
C9orf167	-3.89481	0.000338095	0.00365953	Female
TTLL3	-3.89462	0.000338299	0.00365953	Female
C4orf42	-3.89376	0.000339181	0.00366685	Female
DHX37	-3.89082	0.000342225	0.00369773	Female
ATG4D	-3.89019	0.000342886	0.00369943	Female
C2orf15	-3.89029	0.000342783	0.00369943	Female
FUNDC2	-3.89013	0.000342947	0.00369943	Female
ATP6AP1	-3.88972	0.000343373	0.00370199	Female
RNMT	-3.88915	0.000343973	0.00370643	Female
NAT10	-3.88842	0.000344742	0.00371094	Female
DPCD	-3.88744	0.000345767	0.00371965	Female
TNFRSF10C	-3.88653	0.000346725	0.00372791	Female
RABEP2	-3.88459	0.000348771	0.00374786	Female
RUFY1	-3.88413	0.000349263	0.0037511	Female
GTF2IP1	-3.8807	0.000352921	0.00378831	Female
MCM3	-3.87913	0.000354617	0.00379901	Female
EFCAB7	-3.87721	0.000356687	0.00381624	Female
FAM167A	-3.87589	0.00035812	0.00382949	Female
CACNB3	-3.87475	0.000359358	0.00384064	Female
ZNF630	-3.87384	0.000360355	0.00384712	Female
LPCAT4	-3.87072	0.000363786	0.00387743	Female
THUMPD2	-3.8697	0.00036492	0.0038874	Female
OSBPL5	-3.86891	0.000365794	0.0038946	Female
CUL7	-3.86836	0.000366403	0.00389898	Female
ILF3	-3.86797	0.000366832	0.00390144	Female
ADCK4	-3.86647	0.000368506	0.00391289	Female
ACBD6	-3.86473	0.000370463	0.00393155	Female
DDX58	-3.86129	0.000374355	0.00396842	Female
MED15	-3.86094	0.000374745	0.00396842	Female
ARHGEF10	-3.85983	0.000376007	0.00397536	Female
PPP2R2C	-3.85876	0.000377231	0.00398402	Female
RNPS1	-3.85795	0.000378157	0.00399166	Female
METTL9	-3.85696	0.000379302	0.00399945	Female
PLEKHB2	-3.85314	0.000383715	0.00403301	Female
WDR60	-3.85331	0.000383513	0.00403301	Female
KCNH3	-3.84727	0.000390604	0.00409666	Female
DULLARD	-3.84652	0.00039149	0.00410376	Female
GRIP1	-3.84597	0.000392148	0.00410729	Female
RAB36	-3.84475	0.0003936	0.00411929	Female
SNRPD1	-3.84437	0.000394053	0.00412184	Female
C5orf30	-3.84364	0.000394922	0.00412873	Female
GIPC1	-3.84319	0.000395461	0.00413217	Female
CCNDBP1	-3.84226	0.00039657	0.00414051	Female
FAM155B	-3.84169	0.000397263	0.00414051	Female
ANXA2P2	-3.83886	0.000400673	0.00416516	Female
ATP6V1E1	-3.83857	0.000401031	0.00416516	Female
CCDC78	-3.83907	0.000400424	0.00416516	Female
USP11	-3.83846	0.00040116	0.00416516	Female
ZNF618	-3.83856	0.000401037	0.00416516	Female
ZNF668	-3.8382	0.000401475	0.00416623	Female
ZDHHC7	-3.83761	0.000402194	0.00416929	Female
PPP1R13L	-3.8369	0.00040306	0.00417607	Female
SETD1A	-3.83555	0.000404706	0.0041843	Female
FUT4	-3.83531	0.000405009	0.00418523	Female
EPHA10	-3.83489	0.000405513	0.00418825	Female
BRSK1	-3.83464	0.000405829	0.0041893	Female
TUBB3	-3.83387	0.000406768	0.0041968	Female
ENPP5	-3.83135	0.000409886	0.00422675	Female
BDKRB2	-3.83013	0.000411399	0.00423794	Female
SH2D5	-3.83008	0.000411462	0.00423794	Female
FRMD8	-3.82919	0.000412574	0.00424334	Female
ZNF219	-3.82801	0.00041404	0.00425619	Female
OSBP2	-3.82681	0.00041555	0.00426614	Female
RAVER2	-3.82662	0.000415795	0.00426614	Female
TPRN	-3.82655	0.000415876	0.00426614	Female
LOC550112	-3.82527	0.000417483	0.00427594	Female
IQCE	-3.82276	0.000420662	0.0043016	Female
TRIM63	-3.82261	0.000420864	0.0043016	Female
DDX39	-3.8208	0.000423161	0.00431835	Female
MARS	-3.81928	0.00042511	0.00433374	Female
EPS8L3	-3.81796	0.000426818	0.00434665	Female
RHPN1	-3.81066	0.000436324	0.00442752	Female
FAM57A	-3.80652	0.00044181	0.00447383	Female
PRSS27	-3.80574	0.00044285	0.00448206	Female
MFAP1	-3.80424	0.00044486	0.00449315	Female
BTBD10	-3.80331	0.000446101	0.00449876	Female
POLR3C	-3.80347	0.000445897	0.00449876	Female
RHBDF1	-3.80189	0.000448015	0.00451165	Female
LOC283050	-3.80002	0.000450549	0.00453225	Female
SUPT5H	-3.8	0.000450574	0.00453225	Female
CCDC74B	-3.79734	0.000454208	0.0045618	Female
SF3B2	-3.79689	0.000454828	0.0045657	Female
LOC388242	-3.79641	0.000455488	0.00456999	Female
SDCBP2	-3.79512	0.000457257	0.00457839	Female
TSEN54	-3.79523	0.000457104	0.00457839	Female
LCMT1	-3.79356	0.000459404	0.00459521	Female
LOC92659	-3.79282	0.000460441	0.00460324	Female
AMPD3	-3.79205	0.000461502	0.00460681	Female
SPOCK1	-3.79189	0.000461727	0.00460681	Female
TMEM55A	-3.79188	0.000461735	0.00460681	Female
WDR91	-3.79085	0.000463175	0.00461883	Female
TMEM102	-3.79025	0.00046402	0.00462491	Female
C21orf56	-3.78955	0.000464996	0.00462761	Female
C9orf30	-3.78849	0.000466484	0.00463772	Female
DNASE1L1	-3.788	0.000467166	0.00464215	Female
ZNF526	-3.78761	0.000467721	0.00464532	Female
DPYSL2	-3.78688	0.000468747	0.00465316	Female
FAM171A2	-3.78614	0.00046979	0.00466116	Female
COL7A1	-3.78457	0.000472019	0.00467454	Female
PKP4	-3.78469	0.00047184	0.00467454	Female
RBM3	-3.78452	0.000472089	0.00467454	Female
WDR54	-3.78415	0.000472618	0.00467742	Female
FOXF2	-3.78192	0.000475795	0.00469923	Female
ST14	-3.78189	0.00047584	0.00469923	Female
MYO15B	-3.78056	0.00047775	0.00470833	Female
QSER1	-3.7807	0.000477547	0.00470833	Female
ZNF320	-3.77831	0.000480986	0.00473403	Female
GPR120	-3.7746	0.000486393	0.0047753	Female
P4HTM	-3.77364	0.000487797	0.0047843	Female
LOC91450	-3.77249	0.000489476	0.00479796	Female
CSNK1D	-3.77186	0.000490416	0.00480041	Female
ZNF534	-3.77199	0.000490221	0.00480041	Female
PADI2	-3.77101	0.000491663	0.00480544	Female
CCDC97	-3.77031	0.000492701	0.0048132	Female
DCAF16	-3.76964	0.00049369	0.00481568	Female
RHOG	-3.76965	0.000493672	0.00481568	Female
ZNF33B	-3.76989	0.00049333	0.00481568	Female
ZNF740	-3.76752	0.00049685	0.0048393	Female
RDBP	-3.76698	0.000497652	0.00484471	Female
CREB5	-3.76512	0.000500437	0.0048646	Female
PIP5K1C	-3.7625	0.000504398	0.00490069	Female
ELF4	-3.76179	0.000505469	0.00490867	Female
PDE9A	-3.75983	0.000508454	0.00493035	Female
PTPN2	-3.75911	0.00050956	0.00493459	Female
TAOK2	-3.75811	0.000511083	0.00494609	Female
CHD3	-3.75721	0.000512466	0.00495703	Female
NCEH1	-3.75564	0.000514888	0.00497068	Female
C19orf61	-3.75486	0.000516099	0.00497505	Female
CIAPIN1	-3.75368	0.000517927	0.00498777	Female
CLEC16A	-3.75074	0.000522513	0.00502456	Female
UBL7	-3.74818	0.000526537	0.0050583	Female
BCAR1	-3.74794	0.000526919	0.0050595	Female
B3GALTL	-3.74491	0.000531725	0.0050957	Female
PRRX2	-3.74461	0.000532207	0.00509575	Female
ABLIM1	-3.74392	0.000533315	0.005101	Female
RNF4	-3.74283	0.000535049	0.00511509	Female
GEFT	-3.74151	0.000537169	0.00513037	Female
GMNN	-3.74118	0.000537709	0.00513303	Female
SMARCAL1	-3.74095	0.000538069	0.00513397	Female
C15orf56	-3.74034	0.000539064	0.00513849	Female
CHAF1A	-3.73885	0.000541463	0.00515386	Female
GNAI3	-3.73736	0.000543891	0.00517196	Female
TRIM65	-3.73642	0.000545425	0.00518154	Female
UNC119B	-3.73533	0.000547203	0.00519592	Female
C9orf98	-3.73466	0.000548311	0.00519617	Female
FLII	-3.73506	0.000547652	0.00519617	Female
MMS19	-3.73488	0.000547943	0.00519617	Female
SF4	-3.73356	0.000550114	0.00520847	Female
VEZF1	-3.73204	0.000552632	0.00522476	Female
SCD5	-3.73167	0.000553231	0.00522792	Female
KCNQ1	-3.72985	0.000556252	0.00525141	Female
TRIP10	-3.7288	0.00055801	0.00526548	Female
EPB41L4A	-3.72798	0.00055938	0.00527588	Female
C1QL4	-3.72742	0.000560309	0.00527957	Female
RHOV	-3.72572	0.00056318	0.00530155	Female
CDH16	-3.72523	0.000564002	0.00530675	Female
C19orf44	-3.72414	0.000565838	0.00532148	Female
DYNC2LI1	-3.72389	0.000566268	0.00532297	Female
RBMX	-3.7231	0.000567608	0.00533302	Female
C6orf132	-3.72149	0.000570341	0.00535103	Female
KRT80	-3.71964	0.000573511	0.00536801	Female
PAFAH1B3	-3.7198	0.000573223	0.00536801	Female
CNKSR1	-3.71885	0.000574868	0.00537299	Female
MTL5	-3.71886	0.000574846	0.00537299	Female
C6orf47	-3.71759	0.000577031	0.00538042	Female
CD63	-3.71801	0.000576308	0.00538042	Female
HNRNPA1	-3.7176	0.000577005	0.00538042	Female
TSPO2	-3.71802	0.000576293	0.00538042	Female
ATP8A2	-3.71725	0.000577609	0.00538326	Female
CHIC1	-3.71623	0.000579381	0.00539491	Female
DCDC2	-3.71513	0.000581294	0.00540991	Female
TMC4	-3.71432	0.000582696	0.00542039	Female
CLVS1	-3.71166	0.000587351	0.00545595	Female
ZNF226	-3.71177	0.000587157	0.00545595	Female
C20orf194	-3.7113	0.000587971	0.00545913	Female
PLEKHN1	-3.71089	0.000588689	0.00546064	Female
CDC42BPG	-3.70988	0.000590479	0.00546951	Female
MAP2K5	-3.70993	0.00059039	0.00546951	Female
ZNF296	-3.70897	0.000592078	0.00548173	Female
DDIT3	-3.70743	0.00059481	0.00550444	Female
LAMC2	-3.70665	0.000596202	0.00551473	Female
TBC1D19	-3.70579	0.000597721	0.00552304	Female
ASNS	-3.70531	0.00059858	0.00552633	Female
HPCA	-3.70508	0.000599001	0.00552761	Female
BMS1	-3.70401	0.000600917	0.0055401	Female
RAB3IP	-3.70404	0.000600856	0.0055401	Female
CIRH1A	-3.70296	0.000602802	0.00555488	Female
NFKB2	-3.70201	0.000604513	0.00556803	Female
ORC4L	-3.70105	0.000606241	0.00557872	Female
CLEC5A	-3.70045	0.000607324	0.00558316	Female
CHEK1	-3.69686	0.000613862	0.00563457	Female
C14orf79	-3.69661	0.000614327	0.00563468	Female
GPN1	-3.69559	0.000616188	0.00564384	Female
SSBP2	-3.69578	0.000615844	0.00564384	Female
WNK2	-3.69566	0.000616053	0.00564384	Female
ANKLE2	-3.69472	0.000617787	0.00565585	Female
C4orf10	-3.69344	0.000620156	0.00567226	Female
RNF34	-3.69325	0.000620507	0.00567284	Female
BCAP31	-3.69207	0.000622687	0.00567693	Female
RPL22L1	-3.69215	0.000622547	0.00567693	Female
SEPT2	-3.69241	0.000622062	0.00567693	Female
SYNGR3	-3.69209	0.000622642	0.00567693	Female
ZSWIM1	-3.69186	0.000623077	0.00567785	Female
HRAS	-3.69032	0.000625947	0.00570137	Female
DTNBP1	-3.68622	0.000633631	0.00576068	Female
PFKFB3	-3.68426	0.000637337	0.00578368	Female
PIGS	-3.68431	0.000637256	0.00578368	Female
RALY	-3.68451	0.000636861	0.00578368	Female
ADRA2C	-3.68345	0.000638877	0.00579137	Female
FAM100B	-3.68308	0.000639595	0.00579137	Female
MFSD6	-3.68304	0.000639658	0.00579137	Female
AMBRA1	-3.68266	0.00064039	0.00579267	Female
NCRNA00188	-3.67935	0.000646716	0.00582961	Female
KLHL29	-3.67899	0.000647428	0.00583219	Female
CDH6	-3.6787	0.000647983	0.00583452	Female
XYLT2	-3.67799	0.000649352	0.00583962	Female
DMKN	-3.67778	0.000649763	0.00583985	Female
SCAMP4	-3.67725	0.000650778	0.0058463	Female
H2AFY	-3.67638	0.00065247	0.00585348	Female
ITGB4	-3.67642	0.000652381	0.00585348	Female
LRRC16A	-3.67665	0.000651937	0.00585348	Female
CDK7	-3.67553	0.000654111	0.00586285	Female
ERCC3	-3.67437	0.000656381	0.00588052	Female
SRGAP1	-3.67373	0.000657627	0.005889	Female
DIS3L2	-3.6722	0.000660636	0.00591325	Female
LRRC37A4	-3.67159	0.000661831	0.00592125	Female
FLOT1	-3.66904	0.000666852	0.00594993	Female
SLC6A6	-3.66884	0.000667252	0.0059508	Female
TUBB6	-3.66794	0.000669044	0.00596137	Female
BRF2	-3.66759	0.000669748	0.00596239	Female
C22orf9	-3.66749	0.000669939	0.00596239	Female
RTN4RL1	-3.66737	0.000670179	0.00596239	Female
BAZ2A	-3.66623	0.000672463	0.00597829	Female
STAT6	-3.66505	0.000674825	0.00599524	Female
BBS1	-3.66438	0.000676169	0.00600039	Female
KCTD11	-3.66348	0.000677971	0.00601096	Female
FBXW9	-3.66243	0.000680084	0.00602698	Female
PPCDC	-3.66175	0.000681465	0.00603649	Female
HCG26	-3.66111	0.000682767	0.00604271	Female
AATK	-3.66005	0.000684921	0.00605441	Female
SULF1	-3.66002	0.000684981	0.00605441	Female
TXNDC6	-3.65851	0.000688059	0.00607848	Female
TRAF2	-3.65831	0.00068845	0.0060792	Female
CCDC34	-3.65793	0.000689226	0.00608331	Female
TRIM45	-3.65683	0.000691492	0.00609511	Female
MFSD4	-3.65665	0.000691855	0.00609557	Female
LOC678655	-3.65591	0.000693385	0.00610632	Female
SYT6	-3.65532	0.000694594	0.00610876	Female
XKR5	-3.65558	0.000694063	0.00610876	Female
ARSI	-3.65432	0.000696653	0.00611617	Female
SMOX	-3.65446	0.000696379	0.00611617	Female
C18orf21	-3.65349	0.000698373	0.0061283	Female
ZNF20	-3.65278	0.000699859	0.00613859	Female
FGFR1	-3.65155	0.000702417	0.00615317	Female
INO80	-3.65173	0.000702034	0.00615317	Female
HDX	-3.65073	0.000704114	0.00616217	Female
ATP13A2	-3.64869	0.000708386	0.00619404	Female
CHST14	-3.64808	0.000709679	0.00619984	Female
ZSCAN16	-3.64793	0.000709996	0.00619985	Female
PAEP	-3.64771	0.00071046	0.00620116	Female
GPKOW	-3.64737	0.000711173	0.00620187	Female
RUSC1	-3.64715	0.000711628	0.00620309	Female
C2orf29	-3.64568	0.000714748	0.00621745	Female
LOC145783	-3.64582	0.000714451	0.00621745	Female
JOSD2	-3.64413	0.000718024	0.00623482	Female
KIAA0556	-3.64409	0.000718122	0.00623482	Female
PAK4	-3.6433	0.000719809	0.00624395	Female
MOBKL2B	-3.63923	0.000728523	0.00630842	Female
ST7L	-3.63861	0.000729871	0.0063173	Female
MAP3K1	-3.6382	0.00073075	0.00632213	Female
CHMP1B	-3.6347	0.000738382	0.00637414	Female
C5orf54	-3.6324	0.000743407	0.0064147	Female
NXNL2	-3.63181	0.000744709	0.00642312	Female
MAP3K10	-3.63138	0.000745667	0.00642856	Female
MLLT3	-3.63113	0.000746217	0.00643048	Female
NCRNA00094	-3.63069	0.000747194	0.00643608	Female
MED25	-3.62942	0.000750009	0.00645467	Female
PFDN4	-3.62897	0.000750999	0.00646036	Female
DNAJC5	-3.62726	0.000754801	0.00649023	Female
C7orf36	-3.62661	0.000756267	0.00649999	Female
SH3YL1	-3.62597	0.000757692	0.00650088	Female
DNASE1	-3.62485	0.000760199	0.00651954	Female
PRMT1	-3.62378	0.000762613	0.00652886	Female
STARD7	-3.62394	0.000762266	0.00652886	Female
RUNDC1	-3.62124	0.000768374	0.00657245	Female
EXTL3	-3.61976	0.000771725	0.00659825	Female
FBXW4	-3.61818	0.000775341	0.00662629	Female
TMSB15B	-3.61655	0.000779088	0.00664964	Female
CCDC24	-3.61623	0.000779829	0.00665062	Female
FAM60A	-3.61606	0.000780217	0.00665062	Female
FAM127B	-3.61338	0.000786423	0.00669771	Female
DYRK2	-3.60699	0.0008014	0.00681346	Female
TIMM17B	-3.60547	0.000805007	0.00684117	Female
MNT	-3.6041	0.000808254	0.0068635	Female
URM1	-3.60407	0.000808333	0.0068635	Female
XPO7	-3.60221	0.000812785	0.00689535	Female
ASAH1	-3.59906	0.000820353	0.00694967	Female
MITF	-3.59896	0.000820602	0.00694967	Female
TNFAIP6	-3.59853	0.000821645	0.00695251	Female
SLC13A1	-3.59798	0.000822975	0.00696078	Female
GARS	-3.59671	0.000826065	0.00698391	Female
KCTD10	-3.59508	0.000830045	0.00700703	Female
SMG5	-3.595	0.000830226	0.00700703	Female
TSPO	-3.59506	0.000830077	0.00700703	Female
CDC42SE2	-3.59465	0.000831093	0.00700834	Female
MARK2	-3.59477	0.00083081	0.00700834	Female
AP3M2	-3.59244	0.000836524	0.0070501	Female
S100A3	-3.59205	0.00083748	0.0070501	Female
GNL3L	-3.59175	0.00083823	0.0070534	Female
ZNF500	-3.5914	0.000839085	0.00705456	Female
NPM1	-3.59011	0.000842284	0.00706821	Female
RAB3D	-3.59002	0.000842507	0.00706821	Female
SET	-3.59039	0.0008416	0.00706821	Female
CCDC22	-3.58868	0.000845848	0.00709299	Female
POC5	-3.58844	0.000846439	0.00709299	Female
VPS41	-3.5879	0.000847792	0.00710044	Female
PLP2	-3.58731	0.000849259	0.00710969	Female
PSORS1C2	-3.58529	0.000854309	0.00714589	Female
NCRNA00107	-3.58388	0.00085787	0.00717262	Female
FOXD4	-3.58316	0.000859682	0.00718472	Female
ANXA13	-3.58211	0.00086235	0.0072009	Female
ASXL1	-3.58024	0.00086711	0.0072345	Female
CREB3	-3.58001	0.000867708	0.00723455	Female
RNF121	-3.57895	0.000870416	0.00724978	Female
ABHD12	-3.5783	0.000872072	0.0072605	Female
PI4KB	-3.57797	0.00087293	0.00726456	Female
MAPKAPK2	-3.57541	0.00087952	0.00730087	Female
PLLP	-3.57525	0.000879918	0.0073011	Female
TBX6	-3.57498	0.000880626	0.00730388	Female
CAV2	-3.57464	0.000881516	0.0073051	Female
CDSN	-3.57472	0.000881298	0.0073051	Female
RP9P	-3.57432	0.000882333	0.0073088	Female
LOC645676	-3.57261	0.000886777	0.00733482	Female
ZBTB4	-3.57276	0.000886404	0.00733482	Female
FCHSD1	-3.57219	0.000887884	0.00733908	Female
KCTD2	-3.57106	0.000890835	0.00735753	Female
CIC	-3.57067	0.000891853	0.00736284	Female
RNF215	-3.56921	0.000895677	0.0073882	Female
BRMS1	-3.56784	0.000899302	0.00740879	Female
BTBD9	-3.56759	0.000899959	0.0074111	Female
C2CD4C	-3.56562	0.000905178	0.00744161	Female
ABCG1	-3.56427	0.000908779	0.00746135	Female
ERMP1	-3.56431	0.000908674	0.00746135	Female
GNAZ	-3.56363	0.000910491	0.00746656	Female
DNAL4	-3.56251	0.000913473	0.00748789	Female
AP4M1	-3.56122	0.000916963	0.00750856	Female
C11orf68	-3.56087	0.000917904	0.00750856	Female
SMAGP	-3.56113	0.000917206	0.00750856	Female
YWHAQ	-3.56101	0.000917523	0.00750856	Female
PHLDA3	-3.56063	0.000918538	0.00751062	Female
FAM129B	-3.55892	0.000923173	0.00754539	Female
C14orf176	-3.55825	0.000924979	0.00755387	Female
NR2E3	-3.55831	0.00092482	0.00755387	Female
ZNF14	-3.55774	0.00092636	0.00755887	Female
SCNM1	-3.55754	0.000926898	0.00756012	Female
SULT2B1	-3.55563	0.000932108	0.00759632	Female
THBS3	-3.55356	0.000937785	0.00763625	Female
KIF3B	-3.55327	0.000938583	0.00763958	Female
FAM66C	-3.55249	0.000940723	0.00764861	Female
PIGB	-3.55245	0.000940858	0.00764861	Female
SIRPA	-3.55267	0.00094023	0.00764861	Female
RAB6B	-3.55164	0.000943069	0.00766341	Female
RAB24	-3.55141	0.000943707	0.00766543	Female
GPR107	-3.54959	0.000948772	0.00769703	Female
RPL7	-3.54987	0.000948002	0.00769703	Female
BTN2A1	-3.54862	0.000951457	0.00771563	Female
CRHR1	-3.54827	0.00095243	0.00772034	Female
CRIM1	-3.54634	0.000957838	0.00776098	Female
FLOT2	-3.54581	0.000959337	0.00776992	Female
INPP5J	-3.54561	0.000959887	0.00777117	Female
POLR3D	-3.54513	0.000961234	0.00777826	Female
ANP32A	-3.54403	0.000964351	0.00779294	Female
C11orf17	-3.54395	0.000964562	0.00779294	Female
CCDC74A	-3.54328	0.000966483	0.00780209	Female
C20orf134	-3.54132	0.000972039	0.00783729	Female
ERICH1	-3.5406	0.000974094	0.00784849	Female
SLC7A1	-3.54055	0.000974227	0.00784849	Female
KAT5	-3.5401	0.000975514	0.00785564	Female
FJX1	-3.5399	0.000976085	0.00785703	Female
BCAN	-3.53846	0.000980194	0.00787843	Female
ZNF182	-3.53841	0.000980347	0.00787843	Female
GRID2IP	-3.53481	0.000990732	0.00794565	Female
MMP14	-3.53391	0.000993334	0.00796328	Female
GTF3C2	-3.53164	0.000999952	0.00799532	Female
ZNF768	-3.53157	0.00100018	0.00799532	Female
SRRM5	-3.5308	0.00100243	0.00801008	Female
SCAMP5	-3.52948	0.0010063	0.00803446	Female
CA5B	-3.52934	0.00100671	0.00803451	Female
NCRNA00152	-3.52914	0.00100729	0.00803586	Female
ANKRD36	-3.52796	0.00101078	0.00804085	Female
MAP4K3	-3.52851	0.00100916	0.00804085	Female
SYDE1	-3.52822	0.00101002	0.00804085	Female
GPR84	-3.52746	0.00101224	0.00804596	Female
PBX2	-3.5276	0.00101184	0.00804596	Female
FANCI	-3.52625	0.00101584	0.00807132	Female
FAM66A	-3.52558	0.00101782	0.00808053	Female
GOLPH3L	-3.52459	0.00102077	0.00809083	Female
SLC24A5	-3.52463	0.00102066	0.00809083	Female
C6orf223	-3.52353	0.00102396	0.00810632	Female
TNFRSF4	-3.52356	0.00102385	0.00810632	Female
ATIC	-3.52149	0.00103006	0.00814809	Female
WBP5	-3.52078	0.0010322	0.0081617	Female
TPM1	-3.52048	0.00103311	0.00816563	Female
PTPN13	-3.51981	0.00103513	0.00817584	Female
UIMC1	-3.51978	0.00103523	0.00817584	Female
DCUN1D5	-3.51905	0.00103742	0.00818655	Female
LOC407835	-3.51812	0.00104026	0.00819857	Female
HNRNPA0	-3.51684	0.00104415	0.00821661	Female
CAPS	-3.51664	0.00104475	0.00821804	Female
CCDC112	-3.51587	0.00104712	0.00823335	Female
FARSA	-3.51481	0.00105036	0.00825226	Female
ATP1B3	-3.51332	0.00105492	0.00827815	Female
POLA1	-3.51333	0.00105491	0.00827815	Female
C20orf103	-3.51295	0.00105605	0.00828372	Female
C21orf130	-3.51183	0.00105952	0.00829136	Female
MYOD1	-3.51235	0.00105793	0.00829136	Female
STARD3NL	-3.51239	0.0010578	0.00829136	Female
C17orf63	-3.5101	0.00106489	0.00832339	Female
ZNF576	-3.50838	0.00107024	0.00835829	Female
KIAA0247	-3.50763	0.00107259	0.00837236	Female
C1orf170	-3.50619	0.0010771	0.00839854	Female
INTS9	-3.50568	0.00107869	0.0084076	Female
CBFA2T2	-3.50167	0.00109138	0.00849646	Female
C3orf55	-3.50149	0.00109195	0.0084975	Female
IKBKE	-3.49785	0.00110358	0.00857109	Female
TUFT1	-3.49706	0.00110611	0.00858056	Female
ZNF142	-3.49718	0.00110574	0.00858056	Female
PLSCR1	-3.49686	0.00110678	0.00858237	Female
CDC20B	-3.49604	0.00110943	0.00859275	Female
SLC39A1	-3.49613	0.00110914	0.00859275	Female
DIRC2	-3.49537	0.0011116	0.00860274	Female
ARNT2	-3.49412	0.00111565	0.00862733	Female
PTAFR	-3.48883	0.00113294	0.00875415	Female
TRIM32	-3.48841	0.00113432	0.00875794	Female
RFC4	-3.4872	0.00113832	0.00877501	Female
MAP7D1	-3.48692	0.00113924	0.00877869	Female
EPS8L1	-3.48595	0.00114246	0.00880002	Female
SLC37A1	-3.4841	0.00114865	0.00883731	Female
MYLIP	-3.48374	0.00114983	0.00883945	Female
C3orf52	-3.4823	0.00115468	0.00886848	Female
RBM22	-3.48221	0.00115495	0.00886848	Female
IRGQ	-3.48138	0.00115774	0.00888292	Female
CDC42EP1	-3.48077	0.00115979	0.00889519	Female
EPDR1	-3.48041	0.00116103	0.00890125	Female
FAM176B	-3.47972	0.00116333	0.00891488	Female
C20orf12	-3.47809	0.00116887	0.00893344	Female
PELI3	-3.47815	0.00116867	0.00893344	Female
DALRD3	-3.47771	0.00117016	0.00893985	Female
SLC30A2	-3.47693	0.00117281	0.00895664	Female
SLC6A8	-3.47479	0.00118011	0.00899843	Female
SLC22A4	-3.47419	0.0011822	0.00901083	Female
KIF3C	-3.47341	0.00118486	0.00902763	Female
ANXA3	-3.47298	0.00118634	0.00903539	Female
PPEF1	-3.47258	0.00118773	0.00904251	Female
CYBA	-3.46945	0.00119855	0.00911425	Female
KIN	-3.46914	0.00119964	0.00911906	Female
FAM193B	-3.46678	0.00120788	0.00916713	Female
HIST1H3D	-3.46666	0.0012083	0.00916713	Female
NPTXR	-3.46675	0.001208	0.00916713	Female
C6orf195	-3.4654	0.00121272	0.00919001	Female
TRIM6	-3.46416	0.00121708	0.00921296	Female
SAFB2	-3.46088	0.00122872	0.00928979	Female
RNPEPL1	-3.45987	0.00123233	0.00930991	Female
DUSP12	-3.45667	0.00124382	0.00938229	Female
ZNF506	-3.45581	0.00124692	0.0094021	Female
UNC13A	-3.4555	0.00124804	0.00940332	Female
ANKRD49	-3.4552	0.00124912	0.00940423	Female
KIAA0174	-3.45532	0.00124869	0.00940423	Female
TTLL1	-3.4541	0.0012531	0.00943061	Female
DMPK	-3.45359	0.00125493	0.00943402	Female
HDGFRP3	-3.45358	0.00125499	0.00943402	Female
C19orf52	-3.45326	0.00125614	0.00943904	Female
ZDHHC24	-3.45303	0.00125697	0.00943981	Female
RFXANK	-3.45255	0.00125873	0.00944772	Female
NDRG4	-3.4519	0.00126112	0.00946198	Female
HLA-DQB2	-3.45134	0.00126316	0.00946648	Female
RUSC2	-3.45146	0.00126271	0.00946648	Female
SEC11A	-3.45099	0.00126443	0.00946879	Female
CCL20	-3.44976	0.00126894	0.0094907	Female
ETV7	-3.44987	0.00126853	0.0094907	Female
LOC100272146	-3.44957	0.00126965	0.0094907	Female
YEATS2	-3.44955	0.00126972	0.0094907	Female
ZFP62	-3.44953	0.00126977	0.0094907	Female
C2orf50	-3.44845	0.00127378	0.00951703	Female
LYPD6B	-3.44782	0.00127608	0.00953062	Female
C6orf155	-3.44759	0.00127693	0.00953333	Female
DAB2	-3.44567	0.00128404	0.00957916	Female
YWHAH	-3.4457	0.00128394	0.00957916	Female
GPR37L1	-3.44553	0.00128457	0.00957951	Female
TRNP1	-3.44406	0.00129002	0.00961286	Female
SENP1	-3.44356	0.00129192	0.00962333	Female
PRSS23	-3.44321	0.00129323	0.00962581	Female
UBE2D2	-3.44323	0.00129313	0.00962581	Female
ARHGEF38	-3.44208	0.00129745	0.00964991	Female
DYNC1I2	-3.44085	0.00130206	0.00966957	Female
PCIF1	-3.44087	0.00130201	0.00966957	Female
POLL	-3.44027	0.00130425	0.00968034	Female
ADNP2	-3.43955	0.00130696	0.0096804	Female
CCDC40	-3.43958	0.00130685	0.0096804	Female
LOC100129550	-3.43964	0.00130662	0.0096804	Female
PIWIL4	-3.43982	0.00130595	0.0096804	Female
SYS1-DBNDD2	-3.43867	0.00131031	0.00969791	Female
DRAM2	-3.43815	0.00131228	0.00970876	Female
SNX27	-3.43651	0.00131851	0.00975121	Female
THAP4	-3.43632	0.00131923	0.00975286	Female
C1orf9	-3.43473	0.00132532	0.00977949	Female
FAM127A	-3.43159	0.00133739	0.00986121	Female
SNX7	-3.4314	0.0013381	0.00986271	Female
DNAH7	-3.43114	0.00133912	0.00986657	Female
AES	-3.42923	0.00134654	0.00990633	Female
DCTN1	-3.42834	0.00134998	0.00992798	Female
LENG9	-3.42784	0.00135192	0.00993112	Female
GPRC5B	-3.42623	0.00135824	0.0099724	Female
ARRDC2	-3.42462	0.00136453	0.0100125	Female
ATF7	-3.42424	0.00136605	0.0100174	Female
BAT4	-3.4242	0.00136621	0.0100174	Female
RNF182	-3.42319	0.00137021	0.0100427	Female
SRC	-3.42258	0.00137261	0.0100493	Female
WDR90	-3.42262	0.00137244	0.0100493	Female
DOT1L	-3.42194	0.00137513	0.010064	Female
BMP8B	-3.42067	0.00138018	0.0100859	Female
NCRNA00085	-3.42069	0.00138011	0.0100859	Female
PDRG1	-3.42067	0.00138017	0.0100859	Female
CC2D2A	-3.42031	0.00138162	0.0100878	Female
HIST3H2A	-3.42045	0.00138107	0.0100878	Female
MECP2	-3.42009	0.00138251	0.0100879	Female
NPNT	-3.419	0.00138683	0.0101082	Female
PPP2R1A	-3.41907	0.00138655	0.0101082	Female
B3GALT4	-3.41808	0.00139051	0.0101302	Female
GBAS	-3.41769	0.00139211	0.0101302	Female
GPBP1	-3.41766	0.00139223	0.0101302	Female
RABL2A	-3.41771	0.00139201	0.0101302	Female
HIST1H3E	-3.41573	0.00139997	0.0101785	Female
NCAPH	-3.41568	0.00140018	0.0101785	Female
PLEKHG2	-3.41544	0.00140113	0.0101785	Female
MIF4GD	-3.41394	0.0014072	0.0102066	Female
UNC5A	-3.41189	0.00141553	0.0102604	Female
GRPEL2	-3.4113	0.00141794	0.0102703	Female
C19orf25	-3.41108	0.00141886	0.0102732	Female
THSD4	-3.41092	0.00141953	0.0102742	Female
ITPR3	-3.4107	0.00142042	0.0102769	Female
TES	-3.40943	0.00142562	0.0103069	Female
VEGFB	-3.40773	0.00143262	0.0103499	Female
C19orf54	-3.40736	0.00143412	0.0103569	Female
STK32C	-3.40573	0.00144087	0.010398	Female
VPS72	-3.40495	0.00144413	0.0104178	Female
ATP5G2	-3.40404	0.00144791	0.0104412	Female
CCT8	-3.40346	0.0014503	0.0104508	Female
CTBP2	-3.40236	0.00145491	0.0104725	Female
C4orf44	-3.40123	0.00145966	0.0104951	Female
PLXDC1	-3.39988	0.00146533	0.0105282	Female
COPZ1	-3.3991	0.0014686	0.0105402	Female
GABRG3	-3.39921	0.00146816	0.0105402	Female
MMGT1	-3.39891	0.0014694	0.010542	Female
HS1BP3	-3.39879	0.00146995	0.0105421	Female
PLEKHA9	-3.39859	0.00147076	0.0105441	Female
HSPB8	-3.39712	0.00147701	0.010578	Female
KIAA0101	-3.3971	0.0014771	0.010578	Female
RAN	-3.39681	0.00147831	0.0105828	Female
LOC100128076	-3.3956	0.00148349	0.010616	Female
TNFRSF11A	-3.39474	0.00148715	0.0106384	Female
MX1	-3.39391	0.0014907	0.0106599	Female
MYO3A	-3.39281	0.00149539	0.0106817	Female
DNM1P35	-3.39077	0.00150418	0.0107349	Female
SPNS1	-3.39057	0.00150505	0.0107349	Female
TRIOBP	-3.38805	0.00151599	0.0107936	Female
EIF4B	-3.38666	0.00152207	0.010829	Female
CDCP1	-3.38634	0.00152344	0.0108349	Female
IBSP	-3.38273	0.00153932	0.0109399	Female
LIMK1	-3.38158	0.00154439	0.0109659	Female
AGRN	-3.3811	0.00154653	0.0109732	Female
DHRS13	-3.37454	0.00157586	0.0111513	Female
HNF1B	-3.37297	0.00158297	0.0111812	Female
UFC1	-3.37273	0.00158407	0.0111812	Female
PNKP	-3.37212	0.00158687	0.0111969	Female
MBD6	-3.37159	0.00158928	0.0112099	Female
TRPC1	-3.37118	0.00159111	0.0112188	Female
FIBP	-3.37057	0.00159392	0.0112336	Female
SPATA17	-3.37047	0.00159435	0.0112336	Female
MAP2K7	-3.3697	0.00159787	0.0112544	Female
TMX2	-3.36948	0.00159887	0.0112574	Female
ABCC1	-3.36888	0.00160165	0.0112729	Female
C9orf172	-3.36875	0.00160222	0.0112729	Female
DUT	-3.3685	0.00160338	0.0112732	Female
SCXB	-3.3685	0.00160341	0.0112732	Female
PTGFR	-3.36596	0.00161511	0.0113432	Female
FHDC1	-3.3656	0.00161675	0.0113507	Female
GMIP	-3.36417	0.0016234	0.0113893	Female
CBX3	-3.36323	0.00162776	0.0114118	Female
LRDD	-3.36192	0.00163387	0.0114505	Female
C11orf63	-3.36162	0.00163526	0.0114561	Female
STK36	-3.36117	0.00163739	0.011467	Female
CETN2	-3.36063	0.00163992	0.0114765	Female
RANGAP1	-3.35934	0.00164595	0.0115106	Female
EHMT2	-3.35755	0.00165441	0.0115615	Female
SCMH1	-3.35624	0.00166063	0.0115967	Female
PACRGL	-3.35582	0.00166264	0.0115976	Female
ZNFX1	-3.35471	0.0016679	0.0116269	Female
PPM1G	-3.35427	0.00166999	0.0116373	Female
DUSP4	-3.35301	0.00167603	0.0116587	Female
CDR2L	-3.35257	0.00167812	0.011665	Female
KIAA1522	-3.3526	0.00167801	0.011665	Female
CSPP1	-3.35193	0.00168119	0.0116781	Female
LOC341056	-3.35132	0.00168414	0.0116943	Female
RNF150	-3.3512	0.00168471	0.0116943	Female
SNRPB	-3.35042	0.00168848	0.0117163	Female
ADAM9	-3.34963	0.00169229	0.0117386	Female
DNAH10	-3.34858	0.00169735	0.0117695	Female
SNHG12	-3.34662	0.00170689	0.0118315	Female
FAM53C	-3.34601	0.00170987	0.011848	Female
TMUB2	-3.34555	0.00171212	0.0118594	Female
LRRC27	-3.34444	0.00171755	0.0118928	Female
NSMAF	-3.34384	0.0017205	0.0119091	Female
BCL2	-3.34341	0.00172258	0.0119151	Female
HAPLN1	-3.34285	0.00172535	0.0119258	Female
FAM193A	-3.34192	0.00172996	0.0119535	Female
KLHDC8A	-3.34126	0.00173321	0.0119609	Female
MINK1	-3.34121	0.00173346	0.0119609	Female
TMEM65	-3.33937	0.00174257	0.0120153	Female
C9orf163	-3.33845	0.00174714	0.0120341	Female
TGIF2	-3.33846	0.00174708	0.0120341	Female
CAPRIN1	-3.33808	0.00174897	0.0120383	Female
LOC153910	-3.33816	0.0017486	0.0120383	Female
SYMPK	-3.33706	0.00175407	0.0120692	Female
AKAP8L	-3.33626	0.00175809	0.0120918	Female
NUSAP1	-3.33588	0.00176001	0.0120973	Female
CTXN1	-3.33449	0.00176698	0.012141	Female
OSCP1	-3.33358	0.00177157	0.0121641	Female
ARPP19	-3.33331	0.00177295	0.0121693	Female
DLX4	-3.33303	0.00177434	0.0121746	Female
YKT6	-3.33272	0.0017759	0.0121811	Female
FAM65A	-3.33223	0.00177839	0.0121939	Female
LPCAT1	-3.33135	0.00178287	0.0122161	Female
DEGS2	-3.33077	0.00178579	0.0122318	Female
DCTD	-3.32963	0.00179161	0.0122674	Female
JRKL	-3.3291	0.00179429	0.0122772	Female
RILPL1	-3.32881	0.0017958	0.0122833	Female
HBXIP	-3.32723	0.00180387	0.0123342	Female
TMSB10	-3.32566	0.00181199	0.0123725	Female
ROD1	-3.32547	0.00181295	0.0123748	Female
PDE7A	-3.32469	0.00181697	0.0123961	Female
SMCR7	-3.3245	0.00181797	0.0123961	Female
TULP3	-3.32291	0.00182622	0.0124438	Female
KLHL30	-3.32233	0.00182925	0.0124601	Female
TMEM54	-3.3217	0.00183252	0.012478	Female
ABL1	-3.32124	0.00183494	0.0124874	Female
PMEPA1	-3.32119	0.00183517	0.0124874	Female
HNRNPUL1	-3.32082	0.00183709	0.0124962	Female
ZNF653	-3.31983	0.00184229	0.0125196	Female
OXTR	-3.31939	0.00184459	0.0125298	Female
CCDC43	-3.31907	0.00184629	0.012537	Female
LPL	-3.31823	0.0018507	0.0125583	Female
PDE4A	-3.31754	0.00185432	0.0125786	Female
SLMO1	-3.31661	0.00185925	0.0126049	Female
TSSC1	-3.31656	0.00185948	0.0126049	Female
CLUAP1	-3.31514	0.001867	0.0126514	Female
TEAD2	-3.31071	0.00189067	0.0127899	Female
C2orf67	-3.30935	0.00189801	0.012832	Female
INO80E	-3.30931	0.00189821	0.012832	Female
ZNF766	-3.30826	0.00190388	0.0128659	Female
FAM134A	-3.30668	0.00191244	0.0129104	Female
ALOX5	-3.30544	0.00191915	0.0129483	Female
FAM171A1	-3.3054	0.00191936	0.0129483	Female
E2F5	-3.30501	0.00192152	0.0129512	Female
PTGS1	-3.30513	0.00192088	0.0129512	Female
SFI1	-3.3044	0.00192485	0.0129631	Female
CAPN10	-3.3031	0.00193195	0.0129975	Female
FNBP4	-3.30283	0.00193342	0.013003	Female
TEX19	-3.30089	0.00194412	0.0130615	Female
FAIM	-3.30041	0.00194675	0.0130747	Female
CUEDC1	-3.29918	0.00195357	0.0131116	Female
DYNC1H1	-3.29927	0.00195305	0.0131116	Female
NCOR2	-3.29754	0.00196266	0.0131546	Female
CCDC91	-3.29672	0.00196722	0.0131762	Female
ZBTB7A	-3.29651	0.00196841	0.0131763	Female
BICC1	-3.29623	0.00196996	0.0131811	Female
MMP10	-3.29559	0.00197354	0.0132005	Female
ZNF581	-3.29541	0.00197456	0.0132029	Female
LLGL2	-3.29523	0.00197554	0.013205	Female
KDM3B	-3.29406	0.00198211	0.0132399	Female
LOC80154	-3.2935	0.00198526	0.0132564	Female
LGALS3BP	-3.29311	0.00198744	0.0132665	Female
DEDD	-3.29161	0.00199592	0.013305	Female
DGCR9	-3.29091	0.00199986	0.0133177	Female
ZNF431	-3.29102	0.00199928	0.0133177	Female
SLC39A6	-3.29065	0.00200135	0.0133231	Female
TIGD1	-3.29048	0.00200234	0.0133251	Female
VPS33B	-3.29036	0.00200299	0.0133251	Female
PDLIM7	-3.2902	0.00200391	0.0133266	Female
LGALS9	-3.2896	0.00200729	0.0133401	Female
STK24	-3.28883	0.00201168	0.0133603	Female
ADAP1	-3.28706	0.00202178	0.0134137	Female
KIAA0652	-3.28632	0.00202606	0.0134376	Female
POF1B	-3.2856	0.00203019	0.0134604	Female
ZNF557	-3.28499	0.00203367	0.013479	Female
LOC100126784	-3.28251	0.00204803	0.013565	Female
CACNA1H	-3.28198	0.00205108	0.0135761	Female
UBE2M	-3.28168	0.00205283	0.0135831	Female
CAV1	-3.28032	0.00206076	0.0136263	Female
OLR1	-3.27932	0.00206655	0.0136555	Female
KIAA0753	-3.2789	0.00206901	0.0136626	Female
COPS2	-3.27798	0.00207444	0.0136938	Female
CCDC102A	-3.27746	0.00207748	0.0137092	Female
RNH1	-3.27596	0.00208631	0.0137409	Female
SOX12	-3.27602	0.00208593	0.0137409	Female
FAM21B	-3.27474	0.00209349	0.0137725	Female
ACTN4	-3.27393	0.00209832	0.0137867	Female
SPEG	-3.2737	0.00209966	0.0137908	Female
PTDSS2	-3.27099	0.00211583	0.0138831	Female
TINAGL1	-3.26964	0.00212385	0.0139219	Female
NCDN	-3.26873	0.00212937	0.0139487	Female
RRP12	-3.2682	0.00213256	0.0139603	Female
TANC2	-3.26781	0.0021349	0.013971	Female
ITGB5	-3.26706	0.00213939	0.0139818	Female
MCPH1	-3.26718	0.00213867	0.0139818	Female
PLEKHB1	-3.26628	0.0021441	0.0139948	Female
SLC25A24	-3.26637	0.00214357	0.0139948	Female
MYL12A	-3.26613	0.00214502	0.013995	Female
CCDC109B	-3.26577	0.00214723	0.0140004	Female
ABCC10	-3.26525	0.00215038	0.0140117	Female
DUSP22	-3.26536	0.00214972	0.0140117	Female
JAG1	-3.26462	0.00215418	0.0140318	Female
SLC9A1	-3.26414	0.00215713	0.0140464	Female
ZDHHC8P1	-3.26322	0.00216273	0.0140735	Female
C15orf52	-3.26258	0.0021666	0.0140894	Female
DLGAP4	-3.26102	0.00217619	0.014147	Female
ASF1B	-3.25985	0.00218339	0.0141751	Female
CKS1B	-3.25985	0.00218339	0.0141751	Female
RASGRF1	-3.25906	0.00218827	0.0141974	Female
INSL3	-3.25844	0.00219204	0.0142078	Female
CTDSPL	-3.2581	0.0021942	0.0142171	Female
CHMP4C	-3.25782	0.00219592	0.0142236	Female
CBL	-3.25235	0.00223001	0.0144064	Female
LEMD2	-3.2517	0.00223413	0.0144199	Female
TNIP1	-3.25155	0.00223503	0.0144199	Female
ENDOD1	-3.24773	0.00225919	0.0145567	Female
RSL24D1	-3.24749	0.00226076	0.014562	Female
HCG18	-3.24708	0.00226338	0.0145741	Female
P2RX4	-3.24653	0.00226683	0.0145772	Female
ADAM28	-3.24529	0.00227476	0.0146187	Female
GHRHR	-3.24511	0.00227592	0.0146213	Female
CCDC104	-3.2447	0.00227854	0.0146334	Female
NKX2-5	-3.24327	0.00228773	0.0146781	Female
RAB9B	-3.24269	0.00229147	0.0146967	Female
DOCK6	-3.24204	0.00229566	0.0147097	Female
SLC2A6	-3.24168	0.00229799	0.0147199	Female
SPEF2	-3.24112	0.0023016	0.0147334	Female
LBH	-3.2407	0.00230432	0.014746	Female
PDE1C	-3.24043	0.00230609	0.0147525	Female
SEPT8	-3.2393	0.00231341	0.0147849	Female
MTMR11	-3.23812	0.00232114	0.0148224	Female
DGCR2	-3.2375	0.00232517	0.0148312	Female
KDM6A	-3.23751	0.00232509	0.0148312	Female
PPP1R9B	-3.23664	0.00233078	0.0148621	Female
BEX2	-3.2346	0.00234419	0.014929	Female
PCSK1N	-3.23458	0.00234431	0.014929	Female
PGBD5	-3.23434	0.0023459	0.0149343	Female
SFRS14	-3.23345	0.00235179	0.0149573	Female
LOC401431	-3.23265	0.00235707	0.0149812	Female
C19orf76	-3.23214	0.00236045	0.0149978	Female
ACTG1	-3.23037	0.00237218	0.0150529	Female
GLG1	-3.22774	0.00238978	0.015145	Female
SNHG7	-3.22747	0.00239161	0.0151462	Female
ZNF561	-3.22753	0.00239118	0.0151462	Female
CDH17	-3.22672	0.00239663	0.0151494	Female
GRSF1	-3.22678	0.00239626	0.0151494	Female
PRSS22	-3.22685	0.00239574	0.0151494	Female
SLC22A15	-3.22706	0.00239436	0.0151494	Female
ZNF43	-3.22707	0.00239428	0.0151494	Female
ICA1L	-3.22639	0.00239884	0.0151585	Female
LETM2	-3.22576	0.0024031	0.0151805	Female
NDOR1	-3.22542	0.00240539	0.0151852	Female
TUSC3	-3.22261	0.00242445	0.0152909	Female
C20orf54	-3.2221	0.00242793	0.015303	Female
C12orf70	-3.22193	0.00242908	0.0153053	Female
SFRS12IP1	-3.2217	0.00243063	0.0153101	Female
GIPR	-3.22126	0.00243361	0.0153142	Female
PIGU	-3.22127	0.00243357	0.0153142	Female
FZD3	-3.22088	0.00243619	0.0153256	Female
CHAF1B	-3.21914	0.00244813	0.0153761	Female
IFI35	-3.2181	0.00245525	0.015406	Female
BOLA2	-3.21721	0.0024614	0.0154397	Female
AP3D1	-3.21608	0.00246923	0.0154789	Female
TRIM28	-3.21609	0.00246914	0.0154789	Female
ZNF205	-3.21561	0.00247245	0.0154892	Female
CDCA5	-3.2144	0.00248088	0.0155319	Female
RALGPS1	-3.21439	0.0024809	0.0155319	Female
MBD2	-3.213	0.0024906	0.0155766	Female
NTM	-3.21261	0.00249331	0.0155852	Female
C9orf117	-3.21244	0.00249454	0.0155879	Female
KCNIP4	-3.21152	0.00250095	0.015618	Female
MPV17	-3.21079	0.00250606	0.015645	Female
CDT1	-3.20861	0.00252144	0.015726	Female
VAMP8	-3.20799	0.00252581	0.0157483	Female
MCM7	-3.20783	0.00252688	0.01575	Female
C12orf57	-3.20738	0.00253013	0.0157602	Female
PKMYT1	-3.20746	0.00252955	0.0157602	Female
ZFP64	-3.20622	0.00253835	0.0158014	Female
CTTNBP2	-3.20556	0.00254305	0.0158206	Female
CARD11	-3.20279	0.0025628	0.0159183	Female
DOK1	-3.20284	0.00256246	0.0159183	Female
LOC220930	-3.20226	0.00256662	0.015932	Female
MC1R	-3.20201	0.00256838	0.0159329	Female
CNNM4	-3.20133	0.00257331	0.0159433	Female
DCLRE1C	-3.20145	0.00257239	0.0159433	Female
SNRNP200	-3.20137	0.00257298	0.0159433	Female
DUSP8	-3.19998	0.00258299	0.0159882	Female
CSDE1	-3.19981	0.00258425	0.015991	Female
GYPC	-3.19929	0.002588	0.0160092	Female
TNFRSF12A	-3.19885	0.00259116	0.0160186	Female
RIMKLA	-3.19809	0.00259672	0.0160479	Female
E2F1	-3.19742	0.00260152	0.0160675	Female
TACC1	-3.19743	0.00260151	0.0160675	Female
KCNQ3	-3.19529	0.00261707	0.0161433	Female
CSDA	-3.19435	0.00262396	0.0161756	Female
ZNF385A	-3.19419	0.00262513	0.0161777	Female
LMAN2L	-3.19369	0.00262879	0.0161939	Female
C5orf32	-3.19293	0.00263438	0.0162094	Female
FBLIM1	-3.19303	0.00263368	0.0162094	Female
GBAP1	-3.19055	0.00265195	0.0162869	Female
PRR7	-3.18988	0.00265688	0.0163121	Female
LOC541471	-3.18971	0.00265814	0.0163147	Female
RPL17	-3.18941	0.00266036	0.0163232	Female
CXorf38	-3.18876	0.00266524	0.016343	Female
TMEM87A	-3.18756	0.00267418	0.0163927	Female
USP21	-3.1867	0.00268055	0.016415	Female
ZNF384	-3.18674	0.0026803	0.016415	Female
C3orf21	-3.1863	0.00268359	0.0164226	Female
MANBAL	-3.18612	0.0026849	0.0164226	Female
YWHAB	-3.18556	0.00268909	0.0164431	Female
CC2D1A	-3.18519	0.00269193	0.0164502	Female
ZBTB12	-3.18457	0.00269658	0.0164684	Female
GPR172A	-3.18402	0.00270073	0.0164835	Female
RCE1	-3.18254	0.00271184	0.0165462	Female
RCAN3	-3.18183	0.00271724	0.016574	Female
SLC9A3R1	-3.18156	0.00271928	0.0165813	Female
ACVR1	-3.18086	0.00272458	0.0166033	Female
SDHAP1	-3.17941	0.00273558	0.0166549	Female
C2orf28	-3.17926	0.0027368	0.0166571	Female
C6orf154	-3.17676	0.0027559	0.0167437	Female
CDK18	-3.17691	0.00275477	0.0167437	Female
C11orf9	-3.17565	0.0027644	0.0167836	Female
CD177	-3.1752	0.00276786	0.0167994	Female
POMT2	-3.17458	0.00277265	0.0168232	Female
FRAS1	-3.17411	0.00277631	0.0168353	Female
HINFP	-3.17336	0.00278214	0.0168497	Female
WAPAL	-3.17343	0.00278155	0.0168497	Female
CYFIP2	-3.17282	0.00278628	0.0168662	Female
RELL2	-3.17278	0.00278659	0.0168662	Female
FANCG	-3.17265	0.00278764	0.0168674	Female
RNF113A	-3.17227	0.00279054	0.0168797	Female
VPS39	-3.17165	0.00279537	0.0168966	Female
PTP4A3	-3.17133	0.00279784	0.0169023	Female
TCF3	-3.17124	0.00279857	0.0169023	Female
PTK7	-3.17112	0.00279954	0.016903	Female
RGS3	-3.17061	0.00280345	0.0169214	Female
LOC400657	-3.17018	0.00280683	0.0169366	Female
PAPLN	-3.1698	0.00280983	0.0169495	Female
RTP2	-3.16928	0.00281386	0.0169637	Female
TAF6	-3.16928	0.00281391	0.0169637	Female
EVC	-3.16771	0.00282617	0.0170272	Female
CTNND2	-3.16681	0.00283331	0.0170533	Female
NAP1L4	-3.16542	0.00284421	0.0171096	Female
DKFZP686I15217	-3.16477	0.00284942	0.0171357	Female
AAGAB	-3.16409	0.00285479	0.0171575	Female
MAVS	-3.16368	0.00285806	0.0171719	Female
POGK	-3.16316	0.00286218	0.0171914	Female
SAP30BP	-3.16231	0.00286896	0.0172216	Female
H2AFZ	-3.16022	0.00288561	0.0172955	Female
CCDC148	-3.15903	0.00289519	0.0173368	Female
ARL2BP	-3.15887	0.0028965	0.0173393	Female
C16orf75	-3.15846	0.00289978	0.0173537	Female
ITGB1	-3.15758	0.00290685	0.0173907	Female
ZNF609	-3.15695	0.00291201	0.0174163	Female
C17orf69	-3.15511	0.00292685	0.0174997	Female
APBA2	-3.15425	0.0029339	0.0175365	Female
POLA2	-3.15192	0.00295288	0.0176339	Female
ZNF675	-3.15194	0.00295273	0.0176339	Female
LOC127841	-3.15152	0.00295621	0.0176484	Female
VPS35	-3.15137	0.00295744	0.0176504	Female
ANAPC4	-3.15057	0.00296401	0.0176807	Female
OR2H2	-3.15053	0.00296432	0.0176807	Female
NPEPPS	-3.14982	0.00297017	0.0177103	Female
CAPG	-3.1492	0.00297526	0.0177334	Female
PCGF2	-3.14913	0.00297585	0.0177334	Female
DMBX1	-3.14821	0.00298343	0.0177731	Female
FUT10	-3.14741	0.00299012	0.0178076	Female
SNHG6	-3.146	0.00300176	0.0178661	Female
PDCD11	-3.14349	0.00302276	0.0179639	Female
PARN	-3.14284	0.0030282	0.0179908	Female
BEGAIN	-3.14223	0.00303329	0.0180156	Female
PPP5C	-3.14012	0.00305113	0.0180988	Female
TNFRSF19	-3.13968	0.0030548	0.0181009	Female
DUSP27	-3.13946	0.00305665	0.0181051	Female
NEK11	-3.13823	0.00306715	0.0181291	Female
ZFC3H1	-3.13835	0.00306609	0.0181291	Female
PRIM2	-3.13773	0.00307138	0.0181487	Female
COX19	-3.13721	0.00307575	0.018169	Female
KBTBD3	-3.13682	0.00307912	0.0181762	Female
GRM5	-3.13635	0.00308315	0.0181908	Female
B4GALNT2	-3.1361	0.00308529	0.0181925	Female
BLVRA	-3.13609	0.00308535	0.0181925	Female
FAM21C	-3.13597	0.0030864	0.0181925	Female
FLJ11235	-3.13577	0.00308806	0.0181925	Female
SOX4	-3.13529	0.00309218	0.0182111	Female
SNAP25	-3.1334	0.00310835	0.0182792	Female
SP1	-3.13314	0.00311062	0.0182817	Female
VDAC2	-3.13321	0.00311002	0.0182817	Female
AP2A2	-3.13149	0.00312489	0.0183436	Female
OGFRL1	-3.13168	0.00312323	0.0183436	Female
DNAJC18	-3.13053	0.00313315	0.0183866	Female
PIGX	-3.1303	0.00313512	0.0183927	Female
BLOC1S3	-3.13013	0.00313665	0.0183961	Female
PAR1	-3.1297	0.00314035	0.0184123	Female
VEPH1	-3.12949	0.00314215	0.0184174	Female
RNF148	-3.12908	0.00314579	0.0184332	Female
FGD6	-3.1288	0.00314816	0.0184416	Female
FAM69B	-3.12629	0.00317013	0.0185482	Female
ST6GALNAC4	-3.12502	0.00318126	0.0185968	Female
ZNF763	-3.12474	0.00318369	0.0186001	Female
HDGFRP2	-3.12421	0.00318833	0.0186215	Female
SHISA2	-3.12396	0.00319058	0.0186236	Female
LOC100270804	-3.12335	0.00319593	0.0186437	Female
C15orf57	-3.12226	0.00320562	0.0186892	Female
EDC3	-3.12234	0.00320491	0.0186892	Female
PDE5A	-3.12199	0.00320801	0.0186976	Female
MALT1	-3.12113	0.00321561	0.0187308	Female
LOC388692	-3.1201	0.00322482	0.0187788	Female
DYM	-3.11895	0.003235	0.0188324	Female
LOC730668	-3.11885	0.00323593	0.0188324	Female
LOC100134713	-3.11669	0.00325529	0.0189283	Female
MCM2	-3.11654	0.00325663	0.0189304	Female
MCOLN3	-3.11608	0.00326072	0.0189486	Female
TUBA1C	-3.11582	0.00326305	0.0189566	Female
ENTPD6	-3.11498	0.0032707	0.0189841	Female
AP2B1	-3.11409	0.00327874	0.019014	Female
CLCF1	-3.11371	0.00328209	0.0190278	Female
PPME1	-3.1133	0.00328586	0.019042	Female
DIAPH3	-3.11257	0.00329245	0.0190617	Female
SLC29A2	-3.11254	0.00329278	0.0190617	Female
HIST1H4E	-3.11143	0.0033028	0.0191084	Female
GPRIN2	-3.11091	0.00330756	0.0191145	Female
PAQR4	-3.1109	0.00330771	0.0191145	Female
TMEM62	-3.11101	0.00330671	0.0191145	Female
AGPAT1	-3.11031	0.00331309	0.0191342	Female
C17orf53	-3.10913	0.00332383	0.0191902	Female
TNFAIP8	-3.10903	0.00332474	0.0191902	Female
C17orf86	-3.10868	0.003328	0.0192034	Female
DDN	-3.10778	0.00333619	0.0192368	Female
MAPK12	-3.10782	0.00333587	0.0192368	Female
NACAP1	-3.10684	0.00334486	0.019265	Female
SCRN1	-3.10693	0.00334403	0.019265	Female
XRRA1	-3.10694	0.00334395	0.019265	Female
SPATA8	-3.10616	0.00335114	0.0192833	Female
ZNF260	-3.106	0.00335264	0.0192833	Female
GINS4	-3.10586	0.0033539	0.0192849	Female
PRKD1	-3.10564	0.00335596	0.0192912	Female
GULP1	-3.1049	0.00336276	0.0193246	Female
TBX19	-3.10469	0.00336472	0.0193302	Female
CSNK1E	-3.10456	0.00336596	0.0193316	Female
ANKDD1A	-3.10413	0.00336999	0.0193389	Female
RAD51	-3.10411	0.00337017	0.0193389	Female
PNMA1	-3.10362	0.00337467	0.0193534	Female
C16orf81	-3.10128	0.00339648	0.01946	Female
PPP1R9A	-3.1008	0.00340096	0.0194758	Female
KLC3	-3.0989	0.00341885	0.0195587	Female
NACA	-3.09887	0.00341908	0.0195587	Female
PDZD7	-3.09817	0.00342567	0.0195888	Female
DNM1L	-3.09781	0.00342909	0.0196026	Female
PDZD11	-3.09707	0.00343603	0.0196252	Female
PITPNM1	-3.09637	0.00344267	0.019652	Female
SLC35B2	-3.09637	0.00344272	0.019652	Female
PIP4K2C	-3.09521	0.00345368	0.0196803	Female
ANKRD1	-3.09437	0.00346172	0.0197203	Female
SWAP70	-3.09409	0.00346433	0.0197295	Female
ZCCHC12	-3.09311	0.00347367	0.0197713	Female
C17orf28	-3.09241	0.00348036	0.0198024	Female
SEPT3	-3.09088	0.00349506	0.0198643	Female
MRRF	-3.09046	0.00349913	0.0198817	Female
PLXNA3	-3.08969	0.00350654	0.0199122	Female
PRR14	-3.0893	0.00351027	0.0199277	Female
LOC100302401	-3.08914	0.00351178	0.0199305	Female
GRB7	-3.0883	0.00351988	0.0199534	Female
PLD4	-3.08843	0.00351864	0.0199534	Female
ABHD11	-3.08772	0.00352548	0.0199679	Female
PHLDA2	-3.08781	0.00352465	0.0199679	Female
UBAP2L	-3.08786	0.00352413	0.0199679	Female
PLCB3	-3.08718	0.00353076	0.0199863	Female
PDZK1IP1	-3.08497	0.00355227	0.0200905	Female
WIPF3	-3.08491	0.00355287	0.0200905	Female
TRPC7	-3.08231	0.00357833	0.0201974	Female
RNASEN	-3.07966	0.00360441	0.0203213	Female
IQCD	-3.07913	0.00360963	0.0203449	Female
ZNF711	-3.07788	0.00362201	0.0204089	Female
ADC	-3.07654	0.00363532	0.0204662	Female
CCDC45	-3.07606	0.00364013	0.0204816	Female
C6orf1	-3.07592	0.00364158	0.0204839	Female
PDGFB	-3.07526	0.00364812	0.0205148	Female
CCT4	-3.07434	0.00365739	0.0205611	Female
APH1B	-3.0736	0.00366482	0.0205617	Female
ASB12	-3.07375	0.0036633	0.0205617	Female
NUDCD3	-3.07401	0.00366067	0.0205617	Female
SPSB2	-3.07323	0.00366846	0.0205704	Female
FAM49B	-3.07289	0.0036719	0.0205838	Female
KATNB1	-3.07162	0.00368475	0.0206441	Female
CNIH4	-3.07127	0.00368824	0.0206577	Female
NOC4L	-3.07074	0.00369363	0.0206761	Female
WNT7B	-3.0705	0.00369607	0.0206839	Female
INE2	-3.069	0.00371128	0.0207513	Female
LAMA3	-3.06757	0.00372578	0.0208087	Female
PIGQ	-3.06766	0.00372487	0.0208087	Female
RTP4	-3.06705	0.00373107	0.0208323	Female
LOC151162	-3.06691	0.00373255	0.0208347	Female
FTSJ3	-3.06651	0.00373662	0.0208456	Female
RAD54L	-3.06485	0.00375364	0.0209227	Female
LOC643008	-3.06432	0.00375907	0.0209471	Female
NME2	-3.0634	0.00376861	0.0209942	Female
ARMCX6	-3.06295	0.00377322	0.0210021	Female
SPTLC1	-3.06212	0.00378183	0.0210381	Female
MCM4	-3.06161	0.00378706	0.0210612	Female
RASSF8	-3.06026	0.00380107	0.0211033	Female
PRCC	-3.0597	0.00380695	0.02113	Female
RAP1GAP2	-3.05923	0.0038118	0.021151	Female
KCNC4	-3.05781	0.00382658	0.021221	Female
PALB2	-3.05758	0.00382905	0.0212287	Female
FAM192A	-3.05697	0.0038354	0.021246	Female
CCDC160	-3.0534	0.003873	0.0214301	Female
RAB38	-3.05148	0.00389339	0.0215204	Female
RUFY2	-3.05145	0.0038937	0.0215204	Female
MAPK13	-3.05048	0.00390398	0.021559	Female
SSR2	-3.05025	0.00390645	0.0215666	Female
ADAMTS9	-3.04946	0.00391489	0.0216071	Female
LOC728643	-3.04919	0.0039178	0.0216111	Female
ZNF282	-3.04897	0.00392013	0.0216179	Female
IQGAP1	-3.04851	0.0039251	0.0216331	Female
DRAM1	-3.04828	0.00392751	0.0216371	Female
LMNB2	-3.04824	0.00392801	0.0216371	Female
FBXW11	-3.04809	0.00392953	0.0216394	Female
EPS8L2	-3.04702	0.00394109	0.0216808	Female
GLA	-3.04698	0.00394147	0.0216808	Female
RASAL2	-3.04659	0.00394569	0.0216859	Female
BMPR1A	-3.04631	0.00394871	0.0216964	Female
UBA1	-3.04451	0.00396812	0.0217665	Female
GLS	-3.04371	0.0039768	0.0217959	Female
NCRNA00175	-3.04347	0.0039794	0.0218015	Female
STX1A	-3.04341	0.00398003	0.0218015	Female
FAM13B	-3.04261	0.00398877	0.0218403	Female
GOLGA3	-3.04245	0.00399046	0.0218403	Female
NPTX1	-3.04142	0.00400168	0.0218849	Female
RNF41	-3.0414	0.00400194	0.0218849	Female
MPP3	-3.04105	0.00400575	0.0218996	Female
C8orf79	-3.03932	0.00402466	0.0219725	Female
ITGB1BP1	-3.03825	0.00403647	0.0220309	Female
ZNF574	-3.03567	0.00406494	0.0221678	Female
TGFA	-3.03549	0.00406686	0.0221711	Female
ANXA2P1	-3.03466	0.00407608	0.0221852	Female
DAZAP2	-3.03464	0.00407637	0.0221852	Female
LOC646851	-3.035	0.00407228	0.0221852	Female
REEP2	-3.03459	0.00407685	0.0221852	Female
DSG2	-3.03327	0.0040916	0.0222453	Female
RRM1	-3.03313	0.00409309	0.0222473	Female
LOC100134368	-3.03102	0.00411665	0.0223503	Female
TMC5	-3.03021	0.00412573	0.0223743	Female
ZNF607	-3.03013	0.00412669	0.0223743	Female
B3GNT8	-3.02885	0.00414103	0.0224396	Female
CARM1	-3.02867	0.00414309	0.0224426	Female
PACS2	-3.0286	0.00414387	0.0224426	Female
PYGO2	-3.02822	0.00414821	0.0224589	Female
C11orf92	-3.02659	0.00416666	0.0225323	Female
NME5	-3.02642	0.00416857	0.0225323	Female
TYSND1	-3.02633	0.00416959	0.0225323	Female
ZSCAN2	-3.02606	0.00417261	0.0225424	Female
UXS1	-3.02578	0.00417581	0.0225535	Female
COG2	-3.02392	0.00419694	0.0226552	Female
ESYT3	-3.02323	0.00420485	0.0226792	Female
NXPH4	-3.02307	0.00420665	0.0226827	Female
POLI	-3.02278	0.00420994	0.0226942	Female
NARG2	-3.02224	0.0042162	0.0227217	Female
SNAPIN	-3.02174	0.00422189	0.0227462	Female
YWHAZ	-3.02061	0.00423488	0.0227963	Female
ZCRB1	-3.01979	0.00424428	0.0228355	Female
HDAC5	-3.01966	0.00424581	0.0228375	Female
KCNK7	-3.01943	0.00424843	0.0228385	Female
LAMP3	-3.01953	0.00424733	0.0228385	Female
TPSG1	-3.01934	0.00424948	0.0228385	Female
CASK	-3.01879	0.00425588	0.0228542	Female
GCC2	-3.01895	0.00425402	0.0228542	Female
MFRP	-3.01887	0.00425494	0.0228542	Female
AIM1L	-3.01474	0.0043029	0.0230815	Female
CCDC120	-3.01447	0.0043061	0.0230923	Female
C19orf40	-3.01428	0.00430831	0.0230978	Female
ZFP112	-3.01411	0.00431033	0.0231024	Female
COMP	-3.01325	0.00432038	0.0231499	Female
METTL5	-3.01217	0.00433297	0.0232048	Female
PSG3	-3.01196	0.00433551	0.0232057	Female
RTN2	-3.01202	0.00433476	0.0232057	Female
PLEKHA8	-3.01159	0.00433986	0.0232227	Female
PML	-3.01146	0.00434143	0.0232248	Female
SCIN	-3.01042	0.00435362	0.0232836	Female
CTNNA1	-3.00974	0.00436174	0.0233041	Female
NIPA2	-3.00994	0.00435929	0.0233041	Female
VEZT	-3.00972	0.00436193	0.0233041	Female
UBD	-3.00942	0.00436548	0.0233153	Female
STK33	-3.00874	0.0043735	0.0233518	Female
SLC24A3	-3.00774	0.00438545	0.0233995	Female
ZNF439	-3.00769	0.00438599	0.0233995	Female
LARS	-3.00753	0.0043879	0.0234033	Female
CTHRC1	-3.00702	0.00439402	0.0234258	Female
ESRP1	-3.00688	0.00439569	0.0234258	Female
TTLL4	-3.00695	0.00439483	0.0234258	Female
ZNF664	-3.00582	0.00440825	0.0234736	Female
C5orf28	-3.00567	0.00441009	0.0234771	Female
SPRR1A	-3.00523	0.00441533	0.0234923	Female
RFWD2	-3.00451	0.004424	0.0235257	Female
RCC2	-3.0041	0.00442892	0.0235455	Female
BTN2A2	-3.00366	0.00443412	0.0235477	Female
DKFZP434K028	-3.00367	0.00443406	0.0235477	Female
PYGB	-3.00378	0.00443269	0.0235477	Female
MRPL10	-3.0031	0.00444094	0.0235775	Female
ABCC3	-3.00213	0.0044526	0.023633	Female
PRRT2	-3.00199	0.00445426	0.0236354	Female
TESC	-3.0014	0.00446135	0.0236603	Female
TTC27	-3.0012	0.00446382	0.023667	Female
BAK1	-3.00069	0.00446996	0.0236868	Female
PDPN	-3.00071	0.00446967	0.0236868	Female
TMEM185B	-2.99968	0.00448217	0.0237323	Female
KCNJ16	-2.99921	0.00448794	0.0237565	Female
OTX1	-2.99875	0.00449347	0.023773	Female
LOC389791	-2.99801	0.00450246	0.0238077	Female
SUSD1	-2.9981	0.00450141	0.0238077	Female
TMEM184B	-2.99738	0.00451021	0.0238423	Female
MIER2	-2.99643	0.0045218	0.0238804	Female
SLC4A9	-2.99639	0.00452229	0.0238804	Female
HIST1H2BG	-2.99622	0.00452439	0.0238851	Female
CST1	-2.996	0.00452704	0.0238927	Female
BFAR	-2.99586	0.00452873	0.0238952	Female
ADAMTS16	-2.99472	0.00454276	0.02395	Female
IQCK	-2.99432	0.00454765	0.0239693	Female
UBAP2	-2.99124	0.00458566	0.0241308	Female
EZH1	-2.99039	0.00459631	0.0241675	Female
ARHGEF17	-2.99007	0.00460029	0.0241819	Female
KNTC1	-2.98954	0.00460684	0.0242035	Female
ATP5SL	-2.98868	0.00461759	0.024234	Female
KRT23	-2.98853	0.00461943	0.0242372	Female
LOC100289341	-2.98803	0.00462568	0.0242636	Female
SNORA8	-2.98769	0.00462998	0.0242777	Female
CACNA1S	-2.98685	0.0046405	0.0243218	Female
DPYSL5	-2.98643	0.0046457	0.0243426	Female
C9orf11	-2.9857	0.00465488	0.0243759	Female
RDH13	-2.98553	0.00465702	0.0243759	Female
SSTR5	-2.98456	0.00466917	0.024433	Female
UCK2	-2.98342	0.00468361	0.024502	Female
STS	-2.98186	0.00470334	0.0245922	Female
NUDT1	-2.98171	0.00470535	0.0245961	Female
LCE1E	-2.9816	0.00470675	0.0245969	Female
OPA3	-2.98116	0.00471222	0.024619	Female
PDGFA	-2.97952	0.0047332	0.0247155	Female
FLJ42627	-2.9789	0.00474108	0.02475	Female
GAL3ST4	-2.97866	0.00474416	0.024753	Female
LYPD6	-2.97874	0.00474314	0.024753	Female
CUEDC2	-2.9776	0.00475772	0.0248077	Female
ELAVL3	-2.97745	0.00475969	0.0248077	Female
TNKS	-2.97751	0.0047589	0.0248077	Female
EDA2R	-2.97691	0.00476666	0.0248303	Female
SUPT3H	-2.97662	0.0047703	0.0248303	Female
TNIP2	-2.97662	0.00477035	0.0248303	Female
ENOPH1	-2.97637	0.0047736	0.0248341	Female
PPP1R14B	-2.97638	0.00477342	0.0248341	Female
ATP6V0E1	-2.97607	0.00477747	0.0248411	Female
RPLP0	-2.97611	0.00477697	0.0248411	Female
LOC100268168	-2.97491	0.00479236	0.0249119	Female
SERF1A	-2.97466	0.00479566	0.0249225	Female
G6PD	-2.97437	0.00479943	0.0249289	Female
MAF1	-2.97446	0.00479824	0.0249289	Female
TMEM44	-2.97355	0.00480996	0.0249704	Female
SCAF1	-2.97319	0.00481463	0.0249843	Female
RBBP7	-2.97243	0.00482456	0.0250263	Female
RIN1	-2.97159	0.00483549	0.0250632	Female
DHX9	-2.97142	0.00483774	0.0250683	Female
TSGA14	-2.97082	0.00484557	0.0251022	Female
PARP6	-2.96948	0.00486308	0.0251797	Female
OR2H1	-2.96927	0.00486583	0.0251873	Female
PPIC	-2.96791	0.00488366	0.0252663	Female
HOPX	-2.96699	0.00489576	0.0253156	Female
C1orf106	-2.96561	0.004914	0.0253765	Female
KCTD1	-2.9657	0.00491277	0.0253765	Female
MARCH10	-2.96548	0.00491567	0.0253785	Female
TAF7	-2.96475	0.00492534	0.0254166	Female
DSTYK	-2.96453	0.00492831	0.0254171	Female
EIF3G	-2.9646	0.0049273	0.0254171	Female
ZNF547	-2.96101	0.00497511	0.0256047	Female
OR12D2	-2.96075	0.00497857	0.0256158	Female
GPSM2	-2.96	0.00498863	0.0256608	Female
MCTS1	-2.95958	0.00499426	0.025679	Female
SPTB	-2.95955	0.00499477	0.025679	Female
CRTC3	-2.95905	0.00500151	0.0257069	Female
FLJ35390	-2.9584	0.00501021	0.0257382	Female
FAM66E	-2.95761	0.0050208	0.0257724	Female
MAPK15	-2.95695	0.00502975	0.0258116	Female
UNC50	-2.9545	0.00506304	0.0259418	Female
B4GALT5	-2.95432	0.00506546	0.0259474	Female
DCK	-2.95332	0.00507904	0.0260035	Female
MND1	-2.95281	0.00508597	0.0260322	Female
RALBP1	-2.95243	0.00509123	0.0260523	Female
SLC4A2	-2.95191	0.00509825	0.0260747	Female
BREA2	-2.95144	0.00510472	0.0260942	Female
CXorf50B	-2.9515	0.00510398	0.0260942	Female
TNNI1	-2.95106	0.00510995	0.0261142	Female
PRKRIP1	-2.95036	0.00511954	0.0261563	Female
IFT57	-2.94962	0.00512969	0.0261999	Female
FLJ90757	-2.9489	0.00513971	0.0262389	Female
ATP6V1F	-2.9487	0.00514246	0.0262393	Female
CAPN2	-2.94874	0.00514191	0.0262393	Female
CYTH2	-2.94785	0.00515416	0.0262786	Female
MRPS23	-2.94791	0.00515331	0.0262786	Female
GRN	-2.94575	0.00518324	0.0263926	Female
FLJ22536	-2.94535	0.0051888	0.0264073	Female
AGAP1	-2.94495	0.00519436	0.0264219	Female
KAL1	-2.94381	0.00521037	0.0264828	Female
DEPDC1B	-2.94327	0.00521781	0.0265138	Female
WDR46	-2.94311	0.00522012	0.0265186	Female
MKL1	-2.94292	0.00522279	0.0265197	Female
FHAD1	-2.94254	0.00522814	0.0265304	Female
LOC729991	-2.94163	0.00524087	0.0265691	Female
TNNT2	-2.94083	0.00525218	0.0266128	Female
PLXNB2	-2.94058	0.00525564	0.0266235	Female
CYB561	-2.94025	0.00526027	0.02664	Female
MARK4	-2.93937	0.00527271	0.0266962	Female
PSME3	-2.93835	0.0052871	0.0267558	Female
PIP5KL1	-2.93816	0.00528989	0.0267624	Female
C16orf93	-2.93798	0.0052924	0.0267683	Female
RAB1B	-2.93658	0.00531225	0.0268617	Female
MASTL	-2.93609	0.00531922	0.0268901	Female
SC65	-2.9351	0.00533341	0.0269479	Female
SF3B3	-2.93399	0.00534923	0.027021	Female
RABL2B	-2.93382	0.00535172	0.0270266	Female
SUMO2	-2.93361	0.00535471	0.0270348	Female
GTF2H2C	-2.9334	0.00535768	0.0270428	Female
HCFC1R1	-2.93192	0.00537896	0.0271363	Female
HIST1H1T	-2.93096	0.00539271	0.0271987	Female
WDR4	-2.93075	0.00539574	0.027203	Female
FBRS	-2.92994	0.00540755	0.0272446	Female
SHCBP1	-2.92985	0.00540874	0.0272446	Female
PSG2	-2.92923	0.00541784	0.0272764	Female
LARP4B	-2.929	0.00542117	0.0272862	Female
SMARCE1	-2.92865	0.00542623	0.0273047	Female
TNFRSF10B	-2.92837	0.00543023	0.0273178	Female
ARL14	-2.92741	0.00544425	0.0273604	Female
SHISA9	-2.92751	0.00544274	0.0273604	Female
FATE1	-2.92696	0.00545082	0.0273715	Female
VAX2	-2.92509	0.00547807	0.0274742	Female
COL22A1	-2.9245	0.00548675	0.0275107	Female
MMP7	-2.92436	0.00548885	0.0275142	Female
GSTCD	-2.92408	0.00549295	0.0275207	Female
SH3PXD2B	-2.92417	0.00549156	0.0275207	Female
OSBPL7	-2.92314	0.00550665	0.0275824	Female
ZNF202	-2.9224	0.0055176	0.0276216	Female
WSB2	-2.92204	0.00552295	0.0276358	Female
MBD5	-2.92131	0.00553363	0.0276752	Female
ZP3	-2.92083	0.00554072	0.0276965	Female
GABRD	-2.91992	0.00555432	0.0277339	Female
WHSC2	-2.91813	0.00558089	0.0278345	Female
ENSA	-2.91787	0.0055847	0.0278455	Female
NACC1	-2.91778	0.00558608	0.0278455	Female
ZKSCAN5	-2.91767	0.00558772	0.0278466	Female
HUWE1	-2.91751	0.00559018	0.0278517	Female
BOD1	-2.91684	0.00560007	0.0278868	Female
DPP3	-2.91691	0.00559901	0.0278868	Female
TCEAL8	-2.91624	0.00560906	0.0279175	Female
ITGA3	-2.91576	0.00561634	0.0279467	Female
TCTEX1D2	-2.91541	0.00562154	0.0279655	Female
MICA	-2.9153	0.00562312	0.0279663	Female
GBA	-2.91458	0.00563404	0.0279923	Female
TRAPPC1	-2.91475	0.00563149	0.0279923	Female
LARP1	-2.9141	0.00564115	0.0280134	Female
SSPO	-2.91411	0.00564109	0.0280134	Female
NCRNA00169	-2.9136	0.00564874	0.0280299	Female
ACSS1	-2.9122	0.00566979	0.0281202	Female
SPC25	-2.91194	0.0056738	0.028133	Female
SRPX2	-2.90992	0.0057045	0.0282638	Female
ZNF273	-2.9097	0.00570785	0.0282733	Female
ZFYVE19	-2.9093	0.00571392	0.0282962	Female
FBXO18	-2.90862	0.00572427	0.0283261	Female
RAB19	-2.90877	0.005722	0.0283261	Female
TRAFD1	-2.90864	0.00572399	0.0283261	Female
C22orf24	-2.90811	0.00573198	0.0283556	Female
CCDC6	-2.90804	0.00573312	0.0283556	Female
RAE1	-2.9061	0.00576274	0.0284806	Female
ZFP91	-2.90495	0.00578048	0.0285539	Female
SLCO3A1	-2.90404	0.0057945	0.0286088	Female
SMAD2	-2.90357	0.00580181	0.0286377	Female
IL11	-2.90311	0.00580892	0.0286512	Female
NR2F2	-2.90279	0.00581379	0.0286681	Female
C2CD4A	-2.90192	0.00582736	0.0287267	Female
RSL1D1	-2.90183	0.0058286	0.0287267	Female
HIF1A	-2.89983	0.00585975	0.028873	Female
LOC400027	-2.89827	0.00588418	0.0289426	Female
LOC729234	-2.89801	0.00588828	0.0289555	Female
TMEM159	-2.89743	0.00589731	0.0289926	Female
SLC44A3	-2.89699	0.00590422	0.0290121	Female
KIAA1267	-2.89606	0.00591889	0.0290769	Female
C10orf95	-2.89506	0.00593459	0.0291468	Female
PSMB8	-2.89466	0.00594092	0.0291598	Female
CDYL2	-2.89432	0.0059463	0.0291601	Female
CLDN10	-2.89422	0.00594792	0.0291601	Female
HGS	-2.89326	0.00596298	0.0291842	Female
LOC349114	-2.89295	0.00596792	0.0291842	Female
MCM6	-2.89323	0.0059635	0.0291842	Female
GRIN2A	-2.8928	0.00597042	0.0291843	Female
KIAA1804	-2.89204	0.00598248	0.0292287	Female
KPNB1	-2.89157	0.00598993	0.0292578	Female
S100A6	-2.89126	0.00599477	0.0292617	Female
SDHAP2	-2.89139	0.0059928	0.0292617	Female
RAB11FIP4	-2.88937	0.00602493	0.0293996	Female
APBB1	-2.88879	0.00603426	0.0294365	Female
PAWR	-2.88871	0.0060355	0.0294365	Female
MAP9	-2.88685	0.00606547	0.0295534	Female
DENR	-2.88675	0.00606713	0.0295541	Female
COPS7B	-2.88506	0.00609426	0.0296496	Female
KIAA1328	-2.88512	0.00609333	0.0296496	Female
FIP1L1	-2.8846	0.00610182	0.0296717	Female
NAT14	-2.88436	0.00610566	0.0296757	Female
C20orf135	-2.88353	0.00611906	0.0297188	Female
TMEM130	-2.88339	0.00612143	0.0297229	Female
SETD4	-2.88299	0.00612793	0.0297398	Female
IQGAP3	-2.8818	0.00614732	0.0298045	Female
MAPKBP1	-2.8802	0.00617339	0.0299161	Female
TMEM216	-2.87943	0.00618602	0.02997	Female
LOC441454	-2.8786	0.0061997	0.0300288	Female
VPS26A	-2.87733	0.00622048	0.0301147	Female
CAMSAP1	-2.87709	0.00622444	0.0301264	Female
SQRDL	-2.87679	0.00622944	0.0301432	Female
B3GNT7	-2.87668	0.00623118	0.0301442	Female
KRBA1	-2.87649	0.0062344	0.0301523	Female
RALGDS	-2.87616	0.00623977	0.0301709	Female
C2orf81	-2.87603	0.00624195	0.0301738	Female
SLC35E4	-2.87594	0.00624344	0.0301738	Female
C2CD3	-2.87551	0.00625053	0.0301958	Female
GGTLC1	-2.87548	0.00625105	0.0301958	Female
BLMH	-2.87439	0.00626915	0.0302683	Female
PSPC1	-2.87404	0.00627502	0.0302892	Female
FAM71D	-2.87343	0.00628507	0.0303229	Female
SF3B4	-2.87345	0.00628479	0.0303229	Female
SPIRE1	-2.87162	0.0063153	0.0304463	Female
DYNLL1	-2.87138	0.00631941	0.0304586	Female
CCDC87	-2.87081	0.00632887	0.0304744	Female
WDR66	-2.87089	0.0063276	0.0304744	Female
C20orf20	-2.87067	0.00633128	0.0304785	Female
MED19	-2.86947	0.00635143	0.0305605	Female
CARD10	-2.86908	0.00635798	0.0305846	Female
CLCC1	-2.86704	0.00639235	0.0307251	Female
TIMM22	-2.86697	0.00639345	0.0307251	Female
CDR2	-2.86665	0.0063989	0.0307363	Female
TJAP1	-2.86644	0.0064024	0.0307381	Female
SUPT7L	-2.86605	0.00640914	0.0307629	Female
ZNF16	-2.86436	0.00643784	0.0308856	Female
FNBP1L	-2.8641	0.00644226	0.0308917	Female
MAP4	-2.86418	0.00644083	0.0308917	Female
CCDC157	-2.8633	0.00645583	0.0309339	Female
NUP62	-2.8633	0.00645582	0.0309339	Female
RPL32P3	-2.8628	0.00646439	0.0309601	Female
C12orf36	-2.8625	0.00646945	0.0309693	Female
RABGGTB	-2.86251	0.00646926	0.0309693	Female
MICAL1	-2.86227	0.0064734	0.0309806	Female
HOXB9	-2.8621	0.00647638	0.0309874	Female
PVT1	-2.86021	0.00650878	0.0311348	Female
IDH3G	-2.85949	0.00652111	0.031171	Female
EPCAM	-2.85885	0.00653221	0.0312165	Female
MACF1	-2.85846	0.00653893	0.031241	Female
IPW	-2.85773	0.00655147	0.0312857	Female
CNGB1	-2.85763	0.00655334	0.0312871	Female
SPEF1	-2.85752	0.00655515	0.0312881	Female
RPS6KA4	-2.85686	0.00656667	0.0313203	Female
TM6SF1	-2.85584	0.00658431	0.0313892	Female
ZBTB26	-2.85592	0.00658291	0.0313892	Female
MAP2K2	-2.85497	0.00659937	0.0314534	Female
MDFI	-2.85436	0.00661005	0.0314846	Female
ZNF271	-2.85432	0.00661073	0.0314846	Female
DZIP1	-2.85406	0.0066154	0.031486	Female
[truncated: 2,915 more rows]

## Sheet: COAD
gene	stat	p	fdr	direction
XIST	-12.1971	4.56176e-30	7.98628e-26	Female
STS	-9.32345	3.8568e-19	1.35042e-15	Female
TSIX	-8.65055	7.37455e-17	9.93126e-14	Female
RELL1	-7.75779	5.05747e-14	1.52657e-11	Female
FAM46A	-7.35636	8.01253e-13	1.41692e-10	Female
TUBB2A	-7.33597	9.19198e-13	1.56237e-10	Female
ALKBH5	-7.27726	1.36284e-12	2.16902e-10	Female
LMO4	-7.18092	2.58677e-12	3.53802e-10	Female
SEMA4B	-7.01464	7.69821e-12	8.58423e-10	Female
MYO1C	-6.90417	1.57137e-11	1.5027e-09	Female
POLR2A	-6.79243	3.20461e-11	2.62164e-09	Female
SPON1	-6.74713	4.26673e-11	3.33472e-09	Female
OSR1	-6.66291	7.2363e-11	5.23694e-09	Female
CDKN2B	-6.64164	8.26209e-11	5.78578e-09	Female
CALM1	-6.60542	1.03469e-10	7.10363e-09	Female
SDHA	-6.60346	1.0473e-10	7.16217e-09	Female
SNAI3	-6.56238	1.35004e-10	8.91893e-09	Female
GFI1	-6.55247	1.43505e-10	9.44489e-09	Female
DAPK1	-6.52327	1.71729e-10	1.1135e-08	Female
FECH	-6.4587	2.54827e-10	1.51229e-08	Female
RNF19B	-6.43235	2.99089e-10	1.72242e-08	Female
RHOF	-6.40884	3.44883e-10	1.96035e-08	Female
EGLN3	-6.38692	3.93721e-10	2.18821e-08	Female
TSPAN14	-6.37825	4.14855e-10	2.28392e-08	Female
GLTP	-6.37407	4.25444e-10	2.32758e-08	Female
SFXN1	-6.30884	6.29182e-10	3.19278e-08	Female
KCTD1	-6.30302	6.5144e-10	3.27723e-08	Female
ATP9B	-6.30031	6.6207e-10	3.30866e-08	Female
CIDEC	-6.29951	6.65246e-10	3.30866e-08	Female
MT1E	-6.30049	6.61359e-10	3.30866e-08	Female
SMG6	-6.29998	6.63377e-10	3.30866e-08	Female
P2RX4	-6.29406	6.87238e-10	3.40835e-08	Female
RNF152	-6.29227	6.9461e-10	3.42654e-08	Female
CYB5R3	-6.22134	1.05812e-09	4.79911e-08	Female
ATP5A1	-6.20619	1.15713e-09	5.20766e-08	Female
C10orf54	-6.19951	1.20358e-09	5.37528e-08	Female
C14orf159	-6.1983	1.21219e-09	5.39994e-08	Female
MT1X	-6.15878	1.52896e-09	6.52867e-08	Female
AFAP1L2	-6.15084	1.60174e-09	6.77334e-08	Female
AHDC1	-6.15025	1.60731e-09	6.78054e-08	Female
FZD1	-6.13752	1.73151e-09	7.2271e-08	Female
CHST6	-6.12495	1.86334e-09	7.69375e-08	Female
PLXNB2	-6.06752	2.60154e-09	1.01891e-07	Female
ALAS1	-6.06549	2.63234e-09	1.0241e-07	Female
ANTXR2	-6.06355	2.66203e-09	1.02879e-07	Female
PFN1	-6.05381	2.81624e-09	1.07182e-07	Female
PTAFR	-6.02753	3.27721e-09	1.20787e-07	Female
TTC7A	-6.00543	3.7211e-09	1.35156e-07	Female
SGK223	-5.99571	3.93464e-09	1.40293e-07	Female
PAFAH1B1	-5.99093	4.04376e-09	1.43018e-07	Female
RHOG	-5.98179	4.26121e-09	1.49501e-07	Female
CLSTN1	-5.98009	4.30283e-09	1.50659e-07	Female
INPP5K	-5.97746	4.36788e-09	1.52328e-07	Female
MOBKL2A	-5.97631	4.39682e-09	1.53032e-07	Female
ADRB1	-5.97002	4.55782e-09	1.57695e-07	Female
KIAA0247	-5.95749	4.89556e-09	1.66744e-07	Female
MT2A	-5.95156	5.06401e-09	1.71481e-07	Female
ECE1	-5.94522	5.25009e-09	1.77439e-07	Female
FLII	-5.94087	5.38179e-09	1.81539e-07	Female
FLNB	-5.93429	5.58719e-09	1.87281e-07	Female
ATP2A3	-5.93284	5.63328e-09	1.87494e-07	Female
CAMTA2	-5.92031	6.04882e-09	1.97938e-07	Female
NFYC	-5.91602	6.19777e-09	2.01351e-07	Female
CTSD	-5.90621	6.55214e-09	2.10088e-07	Female
CRK	-5.88744	7.2858e-09	2.29824e-07	Female
GAS2L1	-5.88549	7.36648e-09	2.31951e-07	Female
DOCK5	-5.88142	7.53786e-09	2.35967e-07	Female
PGAM1	-5.87158	7.96815e-09	2.47143e-07	Female
HCST	-5.86983	8.04696e-09	2.48701e-07	Female
RAB3B	-5.86783	8.13818e-09	2.49583e-07	Female
TMEM61	-5.86778	8.1403e-09	2.49583e-07	Female
ALOX5	-5.85725	8.63748e-09	2.6162e-07	Female
FAM114A1	-5.84384	9.31362e-09	2.77302e-07	Female
TMEM127	-5.84418	9.29608e-09	2.77302e-07	Female
TOM1L2	-5.84399	9.30601e-09	2.77302e-07	Female
UNC5B	-5.84526	9.23993e-09	2.77302e-07	Female
PRKX	-5.83058	1.00329e-08	2.95717e-07	Female
VPS18	-5.82441	1.03857e-08	3.04051e-07	Female
C1orf201	-5.81225	1.11168e-08	3.22222e-07	Female
FAM102A	-5.81049	1.12267e-08	3.24334e-07	Female
ZFX	-5.80868	1.13403e-08	3.26822e-07	Female
SHPK	-5.80165	1.17947e-08	3.3685e-07	Female
CYFIP1	-5.7968	1.21181e-08	3.44402e-07	Female
SLC9A1	-5.79001	1.25857e-08	3.55384e-07	Female
CDCP1	-5.77038	1.40386e-08	3.93237e-07	Female
MGAT1	-5.76909	1.41395e-08	3.95432e-07	Female
PPP2CB	-5.76399	1.45451e-08	4.04835e-07	Female
GNB1	-5.76194	1.47121e-08	4.08832e-07	Female
MDGA1	-5.74984	1.57323e-08	4.35801e-07	Female
LMF2	-5.74637	1.6038e-08	4.42169e-07	Female
ROR1	-5.73508	1.7072e-08	4.67e-07	Female
C12orf57	-5.72982	1.75749e-08	4.76292e-07	Female
IL1R2	-5.71331	1.9252e-08	5.16941e-07	Female
SIGLEC1	-5.70374	2.02934e-08	5.39115e-07	Female
LITAF	-5.67989	2.31354e-08	5.97391e-07	Female
SNPH	-5.67892	2.32585e-08	5.98803e-07	Female
ITGA3	-5.67377	2.39248e-08	6.11461e-07	Female
C14orf43	-5.66416	2.52164e-08	6.38875e-07	Female
RAC2	-5.65442	2.65965e-08	6.68478e-07	Female
TNFRSF1A	-5.64574	2.78874e-08	6.97465e-07	Female
ACADS	-5.63442	2.96632e-08	7.29374e-07	Female
ACTB	-5.61335	3.32667e-08	8.0331e-07	Female
ITGB7	-5.60257	3.52698e-08	8.43537e-07	Female
EHD1	-5.59557	3.66349e-08	8.73796e-07	Female
FAM129B	-5.56604	4.29748e-08	1.00449e-06	Female
LCK	-5.56074	4.42205e-08	1.02855e-06	Female
VILL	-5.5576	4.49747e-08	1.04349e-06	Female
PINK1	-5.55669	4.51963e-08	1.04663e-06	Female
SUSD2	-5.55524	4.55508e-08	1.05067e-06	Female
PRSS12	-5.55375	4.59185e-08	1.05776e-06	Female
CTSE	-5.5447	4.82094e-08	1.09469e-06	Female
KDM6B	-5.5447	4.82088e-08	1.09469e-06	Female
ATP5B	-5.54209	4.88901e-08	1.1087e-06	Female
CITED2	-5.53798	4.99804e-08	1.12996e-06	Female
RAB27B	-5.53535	5.06928e-08	1.14366e-06	Female
CYP4F22	-5.5342	5.10063e-08	1.14925e-06	Female
EFNA5	-5.53016	5.21256e-08	1.16849e-06	Female
MATK	-5.51668	5.60289e-08	1.24322e-06	Female
MPDU1	-5.51242	5.73234e-08	1.26471e-06	Female
MAP3K6	-5.51143	5.76259e-08	1.26726e-06	Female
TOB2	-5.51098	5.77641e-08	1.26726e-06	Female
CD7	-5.5082	5.86298e-08	1.28246e-06	Female
RAP2B	-5.50805	5.86768e-08	1.28246e-06	Female
SYT15	-5.50737	5.8892e-08	1.28556e-06	Female
ARHGAP10	-5.50213	6.05633e-08	1.31712e-06	Female
ARF3	-5.50101	6.09291e-08	1.32343e-06	Female
LRP10	-5.49983	6.1313e-08	1.32847e-06	Female
CYB5D2	-5.4978	6.19811e-08	1.33963e-06	Female
OSR2	-5.49692	6.2274e-08	1.34431e-06	Female
CXXC1	-5.49461	6.30457e-08	1.35807e-06	Female
NPTN	-5.49207	6.39069e-08	1.37278e-06	Female
SECTM1	-5.48893	6.49861e-08	1.39085e-06	Female
ANPEP	-5.4865	6.58343e-08	1.40469e-06	Female
BMP2	-5.48626	6.59164e-08	1.40469e-06	Female
CDKN1A	-5.48616	6.5954e-08	1.40469e-06	Female
DGKA	-5.47712	6.92044e-08	1.45869e-06	Female
HEXIM1	-5.4768	6.93223e-08	1.45869e-06	Female
ANKFY1	-5.47118	7.14275e-08	1.49938e-06	Female
BMP1	-5.46878	7.23444e-08	1.51318e-06	Female
ZZEF1	-5.46532	7.36859e-08	1.53574e-06	Female
GSN	-5.45065	7.96521e-08	1.64248e-06	Female
CYTH4	-5.45026	7.98169e-08	1.64395e-06	Female
DSC2	-5.43172	8.80506e-08	1.78208e-06	Female
RIMBP3	-5.41655	9.53931e-08	1.90216e-06	Female
TNIP1	-5.41101	9.822e-08	1.94518e-06	Female
PTPRR	-5.39944	1.0439e-07	2.05575e-06	Female
NLRX1	-5.39664	1.05938e-07	2.08155e-06	Female
PLCL2	-5.39559	1.06522e-07	2.08822e-06	Female
PXN	-5.38392	1.1326e-07	2.20071e-06	Female
FAM78A	-5.38342	1.13554e-07	2.20397e-06	Female
BNIP3L	-5.37692	1.17494e-07	2.27444e-06	Female
HIVEP3	-5.37441	1.1905e-07	2.29472e-06	Female
KIAA1539	-5.36767	1.23323e-07	2.34931e-06	Female
MEIS2	-5.36553	1.24711e-07	2.36616e-06	Female
UBASH3B	-5.35819	1.29596e-07	2.43961e-06	Female
ADCY9	-5.35272	1.33351e-07	2.50223e-06	Female
MMP28	-5.3457	1.38329e-07	2.5763e-06	Female
P2RY1	-5.33545	1.45923e-07	2.69481e-06	Female
VWA5B2	-5.32743	1.52138e-07	2.78898e-06	Female
VPS37B	-5.32426	1.54665e-07	2.83235e-06	Female
ASAP3	-5.32246	1.5612e-07	2.852e-06	Female
FAM46C	-5.31343	1.63621e-07	2.97458e-06	Female
TAX1BP3	-5.31302	1.63969e-07	2.9778e-06	Female
PHF23	-5.31141	1.65345e-07	2.99658e-06	Female
TCN2	-5.30991	1.66637e-07	3.01687e-06	Female
HLA-DPB1	-5.30647	1.69634e-07	3.0569e-06	Female
EHD4	-5.30248	1.73184e-07	3.09051e-06	Female
HOXC4	-5.30212	1.73505e-07	3.09051e-06	Female
KIF1C	-5.30274	1.72947e-07	3.09051e-06	Female
C19orf35	-5.29657	1.78561e-07	3.15764e-06	Female
FER1L6	-5.29576	1.7931e-07	3.1677e-06	Female
BCAR1	-5.29434	1.80636e-07	3.18639e-06	Female
ZFYVE1	-5.29424	1.80732e-07	3.18639e-06	Female
CFD	-5.29353	1.81396e-07	3.19487e-06	Female
SMCR7	-5.28849	1.86188e-07	3.2596e-06	Female
FGFR2	-5.2808	1.93732e-07	3.35809e-06	Female
EIF4E3	-5.27921	1.95326e-07	3.38237e-06	Female
PITPNM2	-5.27771	1.96852e-07	3.3987e-06	Female
PRX	-5.27702	1.97554e-07	3.40746e-06	Female
CDK9	-5.26589	2.09221e-07	3.58049e-06	Female
SLC24A6	-5.25961	2.16095e-07	3.67311e-06	Female
NDRG1	-5.25931	2.16425e-07	3.67503e-06	Female
FBXW5	-5.25836	2.17488e-07	3.68951e-06	Female
CSF1R	-5.25408	2.22336e-07	3.76445e-06	Female
KDM6A	-5.25101	2.25866e-07	3.81683e-06	Female
AMICA1	-5.24709	2.30461e-07	3.8795e-06	Female
C17orf59	-5.24656	2.31098e-07	3.88648e-06	Female
HMP19	-5.23328	2.47383e-07	4.12864e-06	Female
PRPH	-5.23133	2.49873e-07	4.16622e-06	Female
RILP	-5.23054	2.5089e-07	4.17126e-06	Female
TMEM66	-5.22828	2.53808e-07	4.21177e-06	Female
OASL	-5.22741	2.54937e-07	4.22649e-06	Female
TRIM35	-5.22506	2.58033e-07	4.26974e-06	Female
SESN2	-5.22392	2.59542e-07	4.28257e-06	Female
PRDM8	-5.21737	2.6838e-07	4.40763e-06	Female
ASPHD2	-5.21643	2.69667e-07	4.42047e-06	Female
SIGLEC11	-5.21601	2.70246e-07	4.42402e-06	Female
TNK1	-5.21526	2.71284e-07	4.43038e-06	Female
PMP22	-5.20783	2.81776e-07	4.57188e-06	Female
RAB26	-5.20715	2.82764e-07	4.58366e-06	Female
TCF7L2	-5.20667	2.83459e-07	4.59068e-06	Female
ADAM28	-5.20583	2.8467e-07	4.60177e-06	Female
MINK1	-5.19966	2.93782e-07	4.73595e-06	Female
TRERF1	-5.19664	2.98335e-07	4.7961e-06	Female
APOBEC3F	-5.19526	3.00444e-07	4.81673e-06	Female
SLC16A3	-5.19241	3.04822e-07	4.86909e-06	Female
ICMT	-5.18454	3.17281e-07	5.05426e-06	Female
TSPAN4	-5.17731	3.29154e-07	5.21022e-06	Female
ALDOA	-5.17598	3.31384e-07	5.24078e-06	Female
KIF13B	-5.17274	3.36894e-07	5.3231e-06	Female
RASGRP4	-5.16683	3.47136e-07	5.46521e-06	Female
PIRT	-5.16295	3.54045e-07	5.55399e-06	Female
ZBTB46	-5.16112	3.57331e-07	5.59552e-06	Female
LIPH	-5.15951	3.60262e-07	5.62632e-06	Female
TRANK1	-5.15903	3.61133e-07	5.6349e-06	Female
TOP3A	-5.15725	3.64418e-07	5.67604e-06	Female
PTGER2	-5.15599	3.66741e-07	5.69701e-06	Female
ITPKA	-5.15388	3.70672e-07	5.74453e-06	Female
PFKP	-5.15361	3.71194e-07	5.7458e-06	Female
C1QB	-5.14914	3.79677e-07	5.85124e-06	Female
BCAR3	-5.14652	3.84746e-07	5.91326e-06	Female
LTBP4	-5.13271	4.12529e-07	6.29106e-06	Female
MYD88	-5.13	4.18205e-07	6.37207e-06	Female
GPR120	-5.12951	4.19233e-07	6.37594e-06	Female
FCGBP	-5.12848	4.21419e-07	6.39323e-06	Female
DULLARD	-5.12144	4.36624e-07	6.61244e-06	Female
B3GALT5	-5.1191	4.41803e-07	6.67741e-06	Female
C1QC	-5.11898	4.42058e-07	6.67741e-06	Female
ZBTB7C	-5.11678	4.46989e-07	6.73445e-06	Female
CNDP2	-5.10458	4.75252e-07	7.07207e-06	Female
PDE5A	-5.09498	4.98683e-07	7.36125e-06	Female
DDB2	-5.09258	5.04734e-07	7.43804e-06	Female
PTK2B	-5.09084	5.09131e-07	7.49651e-06	Female
CTXN1	-5.0884	5.15401e-07	7.57609e-06	Female
PDLIM2	-5.08569	5.22436e-07	7.6602e-06	Female
HPSE	-5.08326	5.2883e-07	7.74747e-06	Female
INSM1	-5.08253	5.30763e-07	7.7628e-06	Female
STAB1	-5.0802	5.37e-07	7.83438e-06	Female
MAOB	-5.07531	5.50275e-07	8.00403e-06	Female
QSOX1	-5.07101	5.62216e-07	8.12106e-06	Female
PNMA1	-5.06015	5.93503e-07	8.51677e-06	Female
BARX2	-5.0564	6.04716e-07	8.65639e-06	Female
FSCN1	-5.0529	6.15351e-07	8.77992e-06	Female
GNAI2	-5.04991	6.24565e-07	8.89687e-06	Female
HSD17B2	-5.04316	6.45873e-07	9.11879e-06	Female
TRIB2	-5.03905	6.5919e-07	9.26199e-06	Female
CRYBA2	-5.03698	6.66002e-07	9.3502e-06	Female
TOX	-5.0334	6.77949e-07	9.47235e-06	Female
GPN2	-5.03175	6.83541e-07	9.52767e-06	Female
DOK2	-5.03118	6.8547e-07	9.53936e-06	Female
KIAA1211	-5.03047	6.87893e-07	9.56549e-06	Female
APOBEC3D	-5.02409	7.0997e-07	9.82155e-06	Female
TRIOBP	-5.02141	7.19478e-07	9.94151e-06	Female
ITM2C	-5.01476	7.43544e-07	1.02337e-05	Female
RAB35	-5.01177	7.54617e-07	1.03649e-05	Female
HLA-DPA1	-5.01066	7.58781e-07	1.03996e-05	Female
NUMB	-5.01075	7.58435e-07	1.03996e-05	Female
PCSK5	-5.0104	7.59755e-07	1.03996e-05	Female
ACP2	-5.00954	7.62973e-07	1.04192e-05	Female
C5orf32	-5.0098	7.62011e-07	1.04192e-05	Female
STBD1	-5.0083	7.67672e-07	1.04752e-05	Female
CLN8	-5.00795	7.68989e-07	1.04768e-05	Female
HLA-DQB2	-5.00584	7.77062e-07	1.05786e-05	Female
LOC154761	-4.99793	8.07987e-07	1.09147e-05	Female
EVL	-4.99184	8.32606e-07	1.12126e-05	Female
CAMK2N2	-4.98386	8.65978e-07	1.16085e-05	Female
IQCD	-4.98098	8.78345e-07	1.17413e-05	Female
KIAA0913	-4.97075	9.23607e-07	1.22683e-05	Female
HOXD1	-4.97037	9.25342e-07	1.22738e-05	Female
LRRN2	-4.97035	9.25425e-07	1.22738e-05	Female
AIF1L	-4.97	9.27045e-07	1.22848e-05	Female
VAMP2	-4.96643	9.43427e-07	1.24653e-05	Female
LDLRAP1	-4.96179	9.65141e-07	1.27139e-05	Female
SOX13	-4.95941	9.76453e-07	1.28339e-05	Female
FAM115C	-4.95283	1.00844e-06	1.32048e-05	Female
SRL	-4.95043	1.02038e-06	1.33312e-05	Female
ABI3	-4.94817	1.03173e-06	1.34293e-05	Female
C8orf58	-4.94821	1.03149e-06	1.34293e-05	Female
SPATA18	-4.94844	1.03034e-06	1.34293e-05	Female
TRPV6	-4.94778	1.03367e-06	1.34447e-05	Female
C11orf24	-4.94606	1.0424e-06	1.3538e-05	Female
CD101	-4.9448	1.04884e-06	1.35738e-05	Female
RIPK1	-4.9436	1.05501e-06	1.3631e-05	Female
TNFAIP8L2	-4.94257	1.06032e-06	1.36692e-05	Female
ALDH1L1	-4.9362	1.09384e-06	1.40189e-05	Female
DPYSL2	-4.93507	1.09992e-06	1.40762e-05	Female
RHOC	-4.93156	1.1189e-06	1.42878e-05	Female
PRPF8	-4.92942	1.13062e-06	1.44164e-05	Female
CD209	-4.92591	1.15017e-06	1.46444e-05	Female
TRIM7	-4.92399	1.16095e-06	1.47708e-05	Female
TUBB4	-4.92283	1.16754e-06	1.48331e-05	Female
INPP5A	-4.92172	1.17386e-06	1.49027e-05	Female
APOL2	-4.91784	1.19626e-06	1.51321e-05	Female
NFATC1	-4.91694	1.2015e-06	1.51656e-05	Female
SGCB	-4.91362	1.22108e-06	1.53682e-05	Female
KCND3	-4.91271	1.22648e-06	1.54032e-05	Female
TIMM22	-4.90999	1.24279e-06	1.55633e-05	Female
TANC2	-4.90973	1.24436e-06	1.55719e-05	Female
PAG1	-4.90745	1.25822e-06	1.57229e-05	Female
CHST15	-4.90622	1.26577e-06	1.57946e-05	Female
TPO	-4.90464	1.27553e-06	1.58824e-05	Female
ASAP2	-4.9003	1.30267e-06	1.61503e-05	Female
NACC2	-4.89919	1.3097e-06	1.61927e-05	Female
MAFB	-4.89606	1.32974e-06	1.63942e-05	Female
SELPLG	-4.89612	1.32933e-06	1.63942e-05	Female
BCL2L11	-4.89561	1.33262e-06	1.64065e-05	Female
ECHS1	-4.89466	1.3388e-06	1.64711e-05	Female
ZSWIM6	-4.89333	1.34747e-06	1.65429e-05	Female
ACO2	-4.89225	1.35449e-06	1.65736e-05	Female
GNA11	-4.89238	1.35365e-06	1.65736e-05	Female
TTC9B	-4.89208	1.35565e-06	1.65736e-05	Female
CALY	-4.89077	1.36424e-06	1.66553e-05	Female
PRKAR2B	-4.8868	1.39073e-06	1.69433e-05	Female
ATP6V1B2	-4.88241	1.42059e-06	1.72792e-05	Female
ZCCHC2	-4.88016	1.43614e-06	1.74358e-05	Female
MALL	-4.87868	1.44644e-06	1.75366e-05	Female
FZD2	-4.87553	1.46867e-06	1.77569e-05	Female
RETSAT	-4.87189	1.49469e-06	1.80341e-05	Female
SGMS2	-4.86491	1.54589e-06	1.85624e-05	Female
EHD2	-4.85943	1.58725e-06	1.89809e-05	Female
EMP1	-4.85369	1.63171e-06	1.94197e-05	Female
LILRB5	-4.85133	1.65042e-06	1.96156e-05	Female
AKAP13	-4.85049	1.6571e-06	1.96817e-05	Female
SLC25A4	-4.84912	1.668e-06	1.97843e-05	Female
MYO1G	-4.84827	1.67482e-06	1.98518e-05	Female
DHRS1	-4.84753	1.6808e-06	1.99037e-05	Female
PTPRU	-4.84689	1.68596e-06	1.99433e-05	Female
LTC4S	-4.84604	1.69288e-06	2.00114e-05	Female
CHST5	-4.84014	1.74156e-06	2.04673e-05	Female
C15orf58	-4.83841	1.75608e-06	2.06057e-05	Female
DNM2	-4.83549	1.78086e-06	2.08545e-05	Female
TMCC3	-4.83343	1.79853e-06	2.10333e-05	Female
TSPAN1	-4.8326	1.80573e-06	2.11034e-05	Female
ZDHHC18	-4.83106	1.81912e-06	2.12174e-05	Female
ALOX5AP	-4.8304	1.82488e-06	2.12704e-05	Female
CIITA	-4.8261	1.86285e-06	2.16123e-05	Female
LSP1	-4.82452	1.87703e-06	2.17336e-05	Female
ZFYVE19	-4.8217	1.90257e-06	2.19857e-05	Female
MTHFR	-4.82017	1.9165e-06	2.21029e-05	Female
FAM149A	-4.81858	1.93115e-06	2.22133e-05	Female
TCIRG1	-4.81262	1.98694e-06	2.28101e-05	Female
RNF122	-4.80966	2.01526e-06	2.30897e-05	Female
LSMD1	-4.80685	2.0425e-06	2.33713e-05	Female
KLF4	-4.80104	2.09995e-06	2.39816e-05	Female
EPHA4	-4.80044	2.10597e-06	2.39914e-05	Female
RIMBP2	-4.80055	2.10489e-06	2.39914e-05	Female
CD74	-4.79981	2.11223e-06	2.40278e-05	Female
EMP3	-4.79984	2.11201e-06	2.40278e-05	Female
TLE3	-4.79871	2.1234e-06	2.41265e-05	Female
SGPL1	-4.7957	2.15412e-06	2.44091e-05	Female
CCL5	-4.79536	2.15755e-06	2.44323e-05	Female
SDCBP2	-4.79463	2.1651e-06	2.4486e-05	Female
NTRK1	-4.79433	2.16814e-06	2.44946e-05	Female
TCP11L1	-4.79428	2.16865e-06	2.44946e-05	Female
KLF2	-4.79352	2.17659e-06	2.45683e-05	Female
PLK2	-4.79177	2.19473e-06	2.47094e-05	Female
C22orf25	-4.78834	2.23094e-06	2.50205e-05	Female
LAMA3	-4.78767	2.23801e-06	2.50838e-05	Female
ITGB2	-4.78728	2.24219e-06	2.51146e-05	Female
MT1G	-4.78219	2.29716e-06	2.56667e-05	Female
SLC6A8	-4.78058	2.31474e-06	2.58116e-05	Female
SPN	-4.77888	2.33351e-06	2.59712e-05	Female
TMCC2	-4.77873	2.33521e-06	2.59736e-05	Female
MUC2	-4.77734	2.35067e-06	2.6129e-05	Female
RNF144A	-4.77682	2.35643e-06	2.61764e-05	Female
CD300A	-4.77039	2.42947e-06	2.69195e-05	Female
PDLIM5	-4.77002	2.4338e-06	2.69504e-05	Female
ENO2	-4.76648	2.47498e-06	2.73545e-05	Female
PHLPP1	-4.76307	2.51532e-06	2.76607e-05	Female
NLRP3	-4.76118	2.53795e-06	2.7857e-05	Female
DYRK2	-4.75775	2.57946e-06	2.82772e-05	Female
CNNM2	-4.75368	2.62967e-06	2.87376e-05	Female
FUT11	-4.75221	2.64798e-06	2.89017e-05	Female
NTN1	-4.74898	2.68875e-06	2.93284e-05	Female
SCG2	-4.74739	2.709e-06	2.94757e-05	Female
STAB2	-4.74191	2.77999e-06	3.01544e-05	Female
MSRA	-4.74125	2.78872e-06	3.02305e-05	Female
KIAA1522	-4.73943	2.81277e-06	3.04346e-05	Female
GBF1	-4.73912	2.8168e-06	3.04594e-05	Female
PEAR1	-4.72929	2.95049e-06	3.17481e-05	Female
PACSIN2	-4.7275	2.97535e-06	3.1996e-05	Female
IL18BP	-4.72697	2.98283e-06	3.20567e-05	Female
WAS	-4.72625	2.99301e-06	3.20889e-05	Female
ASTN1	-4.72329	3.03494e-06	3.24574e-05	Female
HLA-DPB2	-4.7226	3.04481e-06	3.25232e-05	Female
APC2	-4.72227	3.04956e-06	3.25541e-05	Female
SIDT2	-4.72071	3.07195e-06	3.27332e-05	Female
CBX6	-4.71715	3.12379e-06	3.32451e-05	Female
NAGA	-4.71662	3.13169e-06	3.3309e-05	Female
CHRNA7	-4.71599	3.14092e-06	3.33637e-05	Female
SLC35C1	-4.71592	3.14192e-06	3.33637e-05	Female
C17orf68	-4.71352	3.1776e-06	3.37153e-05	Female
SPDEF	-4.71217	3.19782e-06	3.39093e-05	Female
RNF125	-4.71129	3.21099e-06	3.40078e-05	Female
FBLN2	-4.71095	3.2162e-06	3.40423e-05	Female
TUBGCP2	-4.70943	3.23921e-06	3.42239e-05	Female
BLVRB	-4.70437	3.31696e-06	3.49609e-05	Female
PGM1	-4.70045	3.37842e-06	3.54805e-05	Female
NDEL1	-4.6921	3.51317e-06	3.67194e-05	Female
ACADVL	-4.68866	3.57021e-06	3.71824e-05	Female
RDH5	-4.68702	3.5977e-06	3.74464e-05	Female
RUSC1	-4.68572	3.6196e-06	3.7585e-05	Female
ITGAM	-4.68334	3.66006e-06	3.79827e-05	Female
HS3ST1	-4.68244	3.67539e-06	3.8074e-05	Female
CSF1	-4.67921	3.73123e-06	3.85839e-05	Female
FAM160B2	-4.67722	3.76615e-06	3.88991e-05	Female
KIR2DL4	-4.67677	3.77404e-06	3.89387e-05	Female
TPCN1	-4.67662	3.77665e-06	3.89387e-05	Female
HOXC6	-4.6729	3.84278e-06	3.95739e-05	Female
GLIPR2	-4.67118	3.87373e-06	3.98691e-05	Female
MOSC2	-4.66854	3.92159e-06	4.02198e-05	Female
SOCS6	-4.6687	3.91876e-06	4.02198e-05	Female
EZR	-4.66686	3.95244e-06	4.04651e-05	Female
LUZP1	-4.66653	3.95848e-06	4.05032e-05	Female
RBM47	-4.66599	3.96846e-06	4.05343e-05	Female
HK2	-4.6644	3.99806e-06	4.0789e-05	Female
ENDOD1	-4.6565	4.14761e-06	4.21857e-05	Female
GSR	-4.65652	4.14721e-06	4.21857e-05	Female
HLA-DOA	-4.65628	4.15182e-06	4.21857e-05	Female
CTDSPL	-4.65192	4.23685e-06	4.29251e-05	Female
HLA-DQA1	-4.65066	4.26172e-06	4.30773e-05	Female
FAM59A	-4.64775	4.31966e-06	4.35123e-05	Female
SNRK	-4.64505	4.37417e-06	4.39854e-05	Female
IL17RA	-4.64447	4.38583e-06	4.40774e-05	Female
ING2	-4.64388	4.39801e-06	4.41491e-05	Female
VNN2	-4.64235	4.42924e-06	4.43862e-05	Female
NXF3	-4.6418	4.44053e-06	4.44739e-05	Female
TMEM229B	-4.63928	4.49266e-06	4.49446e-05	Female
LRRC25	-4.63885	4.50163e-06	4.49829e-05	Female
KANK2	-4.63822	4.51495e-06	4.50902e-05	Female
SLC2A5	-4.63707	4.5389e-06	4.5252e-05	Female
MAML3	-4.63568	4.56833e-06	4.55195e-05	Female
P2RY10	-4.63333	4.61823e-06	4.59383e-05	Female
CCBP2	-4.63207	4.64516e-06	4.61799e-05	Female
CALM3	-4.63163	4.65476e-06	4.62491e-05	Female
DPYD	-4.62922	4.70683e-06	4.67399e-05	Female
HBA2	-4.62902	4.71124e-06	4.67571e-05	Female
SIGLEC5	-4.62875	4.71712e-06	4.6789e-05	Female
MT1DP	-4.6278	4.73792e-06	4.69422e-05	Female
ITGAL	-4.62585	4.78089e-06	4.72342e-05	Female
FOSL2	-4.62439	4.81329e-06	4.75007e-05	Female
CD52	-4.62089	4.89167e-06	4.81376e-05	Female
REEP4	-4.61942	4.92491e-06	4.8384e-05	Female
FOLR2	-4.61883	4.93853e-06	4.84907e-05	Female
LAIR1	-4.61734	4.97255e-06	4.87426e-05	Female
ETHE1	-4.61529	5.01969e-06	4.90949e-05	Female
CREB3L1	-4.61465	5.03473e-06	4.91869e-05	Female
LOXL1	-4.61083	5.12418e-06	4.99974e-05	Female
METRNL	-4.60918	5.16333e-06	5.0331e-05	Female
B9D2	-4.60594	5.241e-06	5.10029e-05	Female
KLF13	-4.60551	5.25118e-06	5.10736e-05	Female
UBA7	-4.60331	5.30485e-06	5.15383e-05	Female
SLC5A10	-4.59994	5.38771e-06	5.22853e-05	Female
CCDC109A	-4.59952	5.39809e-06	5.23454e-05	Female
PLCD3	-4.5987	5.41848e-06	5.24385e-05	Female
HLA-DRB1	-4.59416	5.53278e-06	5.33971e-05	Female
ZBTB47	-4.59267	5.57076e-06	5.37044e-05	Female
EPN2	-4.59161	5.59789e-06	5.39067e-05	Female
PRKCB	-4.58776	5.69775e-06	5.46578e-05	Female
RAMP1	-4.58786	5.69537e-06	5.46578e-05	Female
PQLC1	-4.57966	5.91361e-06	5.65117e-05	Female
BSG	-4.57914	5.92776e-06	5.65852e-05	Female
TK2	-4.57837	5.94866e-06	5.67234e-05	Female
TBC1D22A	-4.57691	5.98847e-06	5.69884e-05	Female
LAG3	-4.57484	6.04561e-06	5.74085e-05	Female
ACTR1A	-4.5713	6.14443e-06	5.82092e-05	Female
FYN	-4.57088	6.15636e-06	5.82906e-05	Female
HOXD3	-4.56879	6.21546e-06	5.87549e-05	Female
EPB41L3	-4.56667	6.27592e-06	5.92305e-05	Female
CD247	-4.56628	6.28711e-06	5.93042e-05	Female
MBP	-4.56302	6.38167e-06	6.01313e-05	Female
CD68	-4.56163	6.42209e-06	6.04236e-05	Female
HECTD3	-4.5595	6.48506e-06	6.09415e-05	Female
SLC6A10P	-4.55904	6.49872e-06	6.10043e-05	Female
PRMT2	-4.55745	6.54611e-06	6.12849e-05	Female
ANO1	-4.55507	6.61754e-06	6.19205e-05	Female
GPR132	-4.55105	6.74006e-06	6.29324e-05	Female
TMEM102	-4.55115	6.73677e-06	6.29324e-05	Female
MAN2B2	-4.5478	6.84044e-06	6.35645e-05	Female
NCR1	-4.545	6.92845e-06	6.43119e-05	Female
FMNL1	-4.54402	6.95938e-06	6.45328e-05	Female
ANKRD52	-4.54286	6.99614e-06	6.4805e-05	Female
MRC1	-4.5388	7.12658e-06	6.59411e-05	Female
GOLM1	-4.53411	7.28042e-06	6.72093e-05	Female
PLIN3	-4.53118	7.3779e-06	6.79767e-05	Female
ZMIZ1	-4.53108	7.38126e-06	6.79767e-05	Female
SYT5	-4.53087	7.38827e-06	6.80009e-05	Female
REG4	-4.53036	7.40537e-06	6.80555e-05	Female
KCTD12	-4.52911	7.44773e-06	6.84089e-05	Female
C18orf25	-4.52845	7.47001e-06	6.85776e-05	Female
GFRA2	-4.52681	7.5257e-06	6.90165e-05	Female
PURA	-4.52646	7.53787e-06	6.90919e-05	Female
TNFRSF11A	-4.52337	7.64412e-06	6.99559e-05	Female
HOXD4	-4.52284	7.66269e-06	7.00526e-05	Female
SOBP	-4.52215	7.68663e-06	7.01981e-05	Female
CD14	-4.52184	7.69738e-06	7.0223e-05	Female
MED11	-4.52149	7.70958e-06	7.02977e-05	Female
XKR8	-4.51951	7.77936e-06	7.07865e-05	Female
ACSBG1	-4.5128	8.01922e-06	7.27045e-05	Female
SHROOM3	-4.51225	8.03938e-06	7.28496e-05	Female
HK1	-4.51175	8.05761e-06	7.29393e-05	Female
AP1B1	-4.5112	8.0778e-06	7.30843e-05	Female
APOL6	-4.51106	8.08272e-06	7.3091e-05	Female
PLD4	-4.50989	8.12554e-06	7.34024e-05	Female
GIMAP1	-4.50936	8.14507e-06	7.35409e-05	Female
P2RX1	-4.50576	8.27902e-06	7.46733e-05	Female
IER5	-4.50564	8.28353e-06	7.46754e-05	Female
DHDDS	-4.49767	8.58725e-06	7.71574e-05	Female
EBF4	-4.4976	8.5897e-06	7.71574e-05	Female
CHMP7	-4.49582	8.65928e-06	7.75438e-05	Female
PLXND1	-4.49479	8.69943e-06	7.78635e-05	Female
PANK4	-4.4944	8.71479e-06	7.79611e-05	Female
TNFSF14	-4.49413	8.7253e-06	7.80152e-05	Female
PIK3R6	-4.49228	8.79845e-06	7.85863e-05	Female
C15orf39	-4.49134	8.83617e-06	7.88455e-05	Female
IKZF1	-4.48936	8.91523e-06	7.94699e-05	Female
MAPK7	-4.48862	8.94504e-06	7.96951e-05	Female
SLC15A3	-4.48625	9.04086e-06	8.03036e-05	Female
SLC37A1	-4.48506	9.08944e-06	8.06942e-05	Female
ABHD4	-4.48452	9.11182e-06	8.08518e-05	Female
IGSF3	-4.48368	9.14613e-06	8.11151e-05	Female
CHD3	-4.4832	9.1659e-06	8.12493e-05	Female
C11orf75	-4.48299	9.17479e-06	8.1287e-05	Female
SLCO2A1	-4.48015	9.29301e-06	8.22095e-05	Female
NCF1	-4.47934	9.32669e-06	8.24658e-05	Female
GJD3	-4.47819	9.37519e-06	8.28111e-05	Female
MPPE1	-4.47701	9.42508e-06	8.31259e-05	Female
CAPN2	-4.4765	9.44654e-06	8.32732e-05	Female
VSIG4	-4.47533	9.49646e-06	8.36711e-05	Female
MCOLN1	-4.47507	9.50774e-06	8.36916e-05	Female
FLNA	-4.47135	9.6679e-06	8.49678e-05	Female
DUSP4	-4.46999	9.72709e-06	8.54148e-05	Female
GLG1	-4.46996	9.72851e-06	8.54148e-05	Female
PNPLA3	-4.46948	9.74941e-06	8.55125e-05	Female
TNRC6B	-4.46717	9.8509e-06	8.63162e-05	Female
CXCR4	-4.46653	9.87929e-06	8.65217e-05	Female
WDR1	-4.46612	9.89763e-06	8.65956e-05	Female
HCK	-4.46507	9.94453e-06	8.69191e-05	Female
C2orf88	-4.46429	9.97946e-06	8.71808e-05	Female
TGFB1	-4.45736	1.02941e-05	8.97056e-05	Female
ST6GALNAC6	-4.4545	1.04271e-05	9.07743e-05	Female
NDST1	-4.45342	1.04775e-05	9.11229e-05	Female
CCL23	-4.45184	1.05519e-05	9.16781e-05	Female
SERINC2	-4.45055	1.0613e-05	9.21226e-05	Female
SEPT6	-4.44816	1.07269e-05	9.29686e-05	Female
KCTD11	-4.44576	1.0843e-05	9.38539e-05	Female
RASAL3	-4.4456	1.08505e-05	9.38539e-05	Female
INO80C	-4.44336	1.09597e-05	9.45648e-05	Female
PLLP	-4.44274	1.09903e-05	9.47815e-05	Female
CTSB	-4.44245	1.10042e-05	9.48552e-05	Female
CLEC10A	-4.44066	1.10927e-05	9.5383e-05	Female
EPAS1	-4.43619	1.13165e-05	9.68317e-05	Female
VCL	-4.4357	1.13411e-05	9.69479e-05	Female
CAV2	-4.43538	1.13573e-05	9.70251e-05	Female
PTGFRN	-4.43509	1.13723e-05	9.70251e-05	Female
DOK3	-4.43394	1.14308e-05	9.74766e-05	Female
CACNA1H	-4.43176	1.15424e-05	9.81969e-05	Female
PIK3R5	-4.43002	1.16322e-05	9.86178e-05	Female
EMX1	-4.42822	1.1726e-05	9.93163e-05	Female
CLDN7	-4.42614	1.18353e-05	0.000100145	Female
IL2RB	-4.42551	1.18683e-05	0.000100328	Female
SYTL1	-4.42507	1.18916e-05	0.000100427	Female
CHRFAM7A	-4.42216	1.20469e-05	0.000101445	Female
SSBP2	-4.42108	1.21046e-05	0.000101833	Female
CCR5	-4.42029	1.21472e-05	0.00010214	Female
SCUBE1	-4.41844	1.22478e-05	0.000102791	Female
ANKRD58	-4.41425	1.24779e-05	0.000104572	Female
CSF2RB	-4.41311	1.25413e-05	0.000104966	Female
PVRL2	-4.41271	1.2564e-05	0.000105092	Female
PEX26	-4.41259	1.25706e-05	0.000105097	Female
MAPRE2	-4.40662	1.29081e-05	0.000107559	Female
LAPTM5	-4.40477	1.30147e-05	0.000108396	Female
UBA1	-4.40262	1.31391e-05	0.00010918	Female
ATP2A2	-4.4006	1.32575e-05	0.000109947	Female
ADORA3	-4.39887	1.33597e-05	0.000110742	Female
TBX1	-4.39774	1.34266e-05	0.000111201	Female
TMEM59L	-4.39661	1.34937e-05	0.000111695	Female
S1PR2	-4.39628	1.35138e-05	0.000111808	Female
SCARF1	-4.39277	1.37254e-05	0.000113216	Female
SLC20A1	-4.3926	1.37357e-05	0.000113216	Female
SPI1	-4.39288	1.37189e-05	0.000113216	Female
TBC1D1	-4.39265	1.37325e-05	0.000113216	Female
GLT25D2	-4.39174	1.37883e-05	0.000113436	Female
GIT2	-4.39064	1.38555e-05	0.000113828	Female
DOCK2	-4.3885	1.3987e-05	0.000114649	Female
KSR2	-4.38767	1.40388e-05	0.00011501	Female
PTPRH	-4.38564	1.41652e-05	0.000115883	Female
FCGR2B	-4.38427	1.42514e-05	0.00011648	Female
TCF25	-4.38276	1.43467e-05	0.00011704	Female
SCAMP2	-4.3824	1.43693e-05	0.00011717	Female
ATPAF2	-4.37779	1.46646e-05	0.000119466	Female
C16orf54	-4.37718	1.47044e-05	0.000119735	Female
FXR2	-4.37654	1.47459e-05	0.000120017	Female
OXCT1	-4.37364	1.49356e-05	0.000121223	Female
TP53I3	-4.373	1.49778e-05	0.000121472	Female
WASF2	-4.37276	1.4994e-05	0.000121472	Female
MYO1E	-4.37106	1.51068e-05	0.000122216	Female
ADD1	-4.3696	1.52045e-05	0.000122742	Female
HEBP1	-4.3696	1.52043e-05	0.000122742	Female
ZNF575	-4.36877	1.526e-05	0.000123113	Female
CA5BP	-4.3663	1.54268e-05	0.000124231	Female
SS18	-4.36582	1.54593e-05	0.000124435	Female
SEMA6B	-4.36527	1.54969e-05	0.00012468	Female
ZNF385A	-4.36342	1.5624e-05	0.00012553	Female
SLAMF8	-4.36298	1.56539e-05	0.000125655	Female
ZNF672	-4.36133	1.57682e-05	0.000126399	Female
GPR44	-4.36097	1.57934e-05	0.000126543	Female
C17orf91	-4.35566	1.6166e-05	0.000129114	Female
PPARD	-4.35389	1.62924e-05	0.000129946	Female
CD37	-4.35162	1.6456e-05	0.000131131	Female
AHNAK	-4.35032	1.65499e-05	0.00013164	Female
SLC35A4	-4.35038	1.65457e-05	0.00013164	Female
C1QA	-4.34987	1.65824e-05	0.000131778	Female
TRPV2	-4.34799	1.67202e-05	0.000132693	Female
CHRNA3	-4.34707	1.67877e-05	0.000133168	Female
LILRB1	-4.34695	1.67964e-05	0.000133177	Female
ARNT2	-4.3461	1.68595e-05	0.000133556	Female
CAV1	-4.34386	1.70255e-05	0.000134749	Female
AXL	-4.34224	1.7147e-05	0.000135405	Female
TWF2	-4.34174	1.71848e-05	0.000135459	Female
PIAS1	-4.34116	1.7228e-05	0.000135739	Female
USH1G	-4.33926	1.73721e-05	0.00013675	Female
FLI1	-4.33778	1.74855e-05	0.000137582	Female
UBASH3A	-4.33753	1.75044e-05	0.000137669	Female
HOXC5	-4.33582	1.76361e-05	0.000138597	Female
SRGAP1	-4.33579	1.76383e-05	0.000138597	Female
DISP2	-4.33203	1.79312e-05	0.000140583	Female
DLST	-4.33141	1.79799e-05	0.000140893	Female
FPR3	-4.32621	1.83932e-05	0.000144011	Female
RGS9	-4.32606	1.84054e-05	0.000144042	Female
SIGLEC14	-4.32472	1.85131e-05	0.000144627	Female
JOSD1	-4.32461	1.85223e-05	0.000144635	Female
ELAVL4	-4.32374	1.85928e-05	0.00014512	Female
ANGPTL4	-4.32254	1.86901e-05	0.000145675	Female
MPEG1	-4.32209	1.87269e-05	0.000145842	Female
PGAM4	-4.32187	1.8745e-05	0.000145917	Female
SETBP1	-4.32011	1.889e-05	0.000146916	Female
SNX33	-4.31911	1.89728e-05	0.000147494	Female
SLC12A4	-4.31737	1.91167e-05	0.000148481	Female
PTGDR	-4.31679	1.91652e-05	0.000148726	Female
FOXD1	-4.31618	1.92168e-05	0.000148994	Female
SH2B3	-4.31435	1.93703e-05	0.000150052	Female
MT1H	-4.31268	1.95117e-05	0.000151079	Female
CIB1	-4.31197	1.9572e-05	0.00015148	Female
ASAH1	-4.31114	1.96431e-05	0.000151913	Female
CASZ1	-4.31098	1.96568e-05	0.000151935	Female
RPH3AL	-4.30995	1.97454e-05	0.000152552	Female
ARSB	-4.30975	1.97627e-05	0.000152617	Female
MBD1	-4.30838	1.98807e-05	0.000153221	Female
ZNF467	-4.30761	1.99476e-05	0.000153639	Female
GOLGA3	-4.30673	2.00241e-05	0.000154161	Female
RNF34	-4.30637	2.00553e-05	0.000154334	Female
FBLIM1	-4.30575	2.01099e-05	0.000154685	Female
TYMS	-4.30243	2.04026e-05	0.000156593	Female
DOCK8	-4.30185	2.04544e-05	0.000156853	Female
CCL13	-4.30054	2.05712e-05	0.00015761	Female
C11orf9	-4.30019	2.06026e-05	0.000157782	Female
SGSM3	-4.29917	2.06935e-05	0.000158339	Female
HLA-DQB1	-4.29859	2.07462e-05	0.000158673	Female
C1orf69	-4.29828	2.07743e-05	0.00015875	Female
LETM1	-4.29812	2.07885e-05	0.000158789	Female
SMAP2	-4.29568	2.10101e-05	0.000159993	Female
BST2	-4.29519	2.10544e-05	0.000160191	Female
C1orf183	-4.2949	2.10811e-05	0.000160304	Female
MAF	-4.29263	2.12905e-05	0.000161631	Female
PSAP	-4.29253	2.1299e-05	0.000161631	Female
TYROBP	-4.2905	2.14878e-05	0.000162851	Female
FAS	-4.28753	2.17664e-05	0.000164891	Female
CNNM4	-4.28588	2.19233e-05	0.000165936	Female
ENTPD4	-4.2856	2.19496e-05	0.000166064	Female
EPHB6	-4.2837	2.21314e-05	0.000167367	Female
NRXN1	-4.28343	2.21573e-05	0.000167418	Female
TUBA1A	-4.28252	2.22447e-05	0.000167934	Female
APLP1	-4.28178	2.23159e-05	0.00016837	Female
B4GALT1	-4.28139	2.23531e-05	0.000168534	Female
SRPX	-4.28092	2.23987e-05	0.000168747	Female
HLA-DRA	-4.28031	2.2458e-05	0.000169013	Female
LGMN	-4.28004	2.24842e-05	0.000169013	Female
LYNX1	-4.27669	2.28135e-05	0.000171194	Female
C3AR1	-4.27577	2.29037e-05	0.000171797	Female
GMPPB	-4.27404	2.30761e-05	0.000172868	Female
TARP	-4.27253	2.32269e-05	0.000173924	Female
PML	-4.27233	2.32477e-05	0.000174005	Female
P2RY6	-4.27141	2.33402e-05	0.000174474	Female
BAI2	-4.26998	2.34844e-05	0.000175327	Female
MMP23B	-4.26912	2.35724e-05	0.000175908	Female
CAPNS1	-4.26743	2.37446e-05	0.000177043	Female
APOBEC3C	-4.26621	2.38702e-05	0.000177828	Female
LMNA	-4.26452	2.4045e-05	0.000178902	Female
CAPZB	-4.26038	2.44784e-05	0.000181663	Female
CTDP1	-4.25965	2.45558e-05	0.000182161	Female
GRIK5	-4.25559	2.49895e-05	0.000185079	Female
MEFV	-4.2553	2.50215e-05	0.000185222	Female
SPRR3	-4.25309	2.526e-05	0.000186593	Female
ENTPD3	-4.25226	2.53512e-05	0.000187188	Female
LILRA1	-4.25106	2.54823e-05	0.000187998	Female
NUDT18	-4.24951	2.56532e-05	0.000188861	Female
RGS3	-4.24935	2.56702e-05	0.000188907	Female
WDR7	-4.24804	2.58153e-05	0.000189665	Female
ETV5	-4.24648	2.59895e-05	0.000190775	Female
GMEB1	-4.24519	2.61342e-05	0.000191604	Female
NCF1B	-4.24506	2.61485e-05	0.000191621	Female
PPAPDC3	-4.24474	2.61851e-05	0.000191729	Female
CCDC68	-4.24338	2.63379e-05	0.000192605	Female
RCOR1	-4.24215	2.64777e-05	0.000193547	Female
ADCY7	-4.24053	2.66631e-05	0.000194659	Female
CD4	-4.23973	2.67549e-05	0.000195166	Female
FAM116B	-4.23916	2.68204e-05	0.000195331	Female
FAM174B	-4.23914	2.68221e-05	0.000195331	Female
IL10RA	-4.23847	2.68994e-05	0.000195812	Female
KDM5C	-4.23807	2.69457e-05	0.000195904	Female
PCDHB7	-4.23822	2.69292e-05	0.000195904	Female
CD53	-4.23684	2.7089e-05	0.000196783	Female
CD33	-4.23564	2.72288e-05	0.000197717	Female
SFN	-4.23405	2.74154e-05	0.000198824	Female
ARX	-4.23385	2.74383e-05	0.000198908	Female
SSTR3	-4.23256	2.75915e-05	0.000199936	Female
VPS53	-4.231	2.77766e-05	0.000201193	Female
CA2	-4.22846	2.8081e-05	0.000202731	Female
SPINT1	-4.22843	2.80837e-05	0.000202731	Female
ZNF578	-4.22763	2.81808e-05	0.000203175	Female
CDC42BPB	-4.22644	2.8325e-05	0.000203984	Female
PPP1R16B	-4.22502	2.8498e-05	0.000204977	Female
FLNC	-4.22214	2.88516e-05	0.000207265	Female
DPEP2	-4.22178	2.88959e-05	0.000207434	Female
FAM57B	-4.22039	2.90675e-05	0.000208559	Female
SGSM2	-4.21928	2.92061e-05	0.000209382	Female
SSC5D	-4.2186	2.92916e-05	0.000209909	Female
C2CD4C	-4.21532	2.97053e-05	0.000212526	Female
ABHD6	-4.21222	3.01014e-05	0.000215007	Female
ZADH2	-4.21213	3.01135e-05	0.000215007	Female
CSK	-4.20884	3.05398e-05	0.000217607	Female
SQRDL	-4.20742	3.07254e-05	0.00021884	Female
CD300C	-4.20687	3.07971e-05	0.000219262	Female
NEFL	-4.2059	3.09247e-05	0.000220081	Female
SGPP2	-4.20487	3.10615e-05	0.000220965	Female
IL12RB1	-4.20389	3.11921e-05	0.000221643	Female
SLC1A1	-4.20386	3.11949e-05	0.000221643	Female
TUBB2C	-4.20336	3.1262e-05	0.00022203	Female
CPNE5	-4.19797	3.19893e-05	0.000226552	Female
ISG20	-4.19595	3.22654e-05	0.000228323	Female
ABCG2	-4.19481	3.24216e-05	0.000229243	Female
NKG7	-4.19305	3.26665e-05	0.000230695	Female
ANK1	-4.19138	3.28993e-05	0.000231952	Female
ABHD3	-4.18911	3.32176e-05	0.000233816	Female
ITPK1	-4.18521	3.37742e-05	0.000236988	Female
CA8	-4.18428	3.39076e-05	0.000237543	Female
GSTM5	-4.18439	3.38915e-05	0.000237543	Female
FAM189A2	-4.18333	3.40444e-05	0.000238406	Female
CASS4	-4.18171	3.42795e-05	0.000239765	Female
CMKLR1	-4.18049	3.44579e-05	0.000240916	Female
FGL2	-4.17998	3.45328e-05	0.000241247	Female
SMAD4	-4.18003	3.45243e-05	0.000241247	Female
TNFRSF18	-4.17967	3.45772e-05	0.000241461	Female
GBA2	-4.17917	3.4651e-05	0.000241784	Female
TBC1D10A	-4.17891	3.469e-05	0.000241959	Female
STIM1	-4.1788	3.47056e-05	0.000241971	Female
BHLHE41	-4.17848	3.47532e-05	0.000242207	Female
CHMP1B	-4.17815	3.48021e-05	0.000242452	Female
ANKHD1-EIF4EBP3	-4.1775	3.48982e-05	0.000243024	Female
RREB1	-4.17599	3.51223e-05	0.000244293	Female
SYTL3	-4.17207	3.571e-05	0.00024779	Female
LRMP	-4.16833	3.62815e-05	0.000251457	Female
PRKD2	-4.16784	3.63557e-05	0.000251588	Female
MPRIP	-4.16663	3.65432e-05	0.000252671	Female
HVCN1	-4.16063	3.74834e-05	0.000258559	Female
SST	-4.15665	3.81182e-05	0.00026273	Female
OPRL1	-4.15548	3.83076e-05	0.000263932	Female
LRFN3	-4.1551	3.83696e-05	0.000264151	Female
GPR146	-4.15425	3.85073e-05	0.000264882	Female
ABCD4	-4.15166	3.89308e-05	0.000267384	Female
SLC41A2	-4.14803	3.95318e-05	0.00027098	Female
USP43	-4.14691	3.97184e-05	0.000272152	Female
NCOR1	-4.14455	4.01158e-05	0.000274446	Female
PIK3CD	-4.14464	4.01014e-05	0.000274446	Female
LHFPL2	-4.14366	4.02664e-05	0.000275369	Female
LRRC26	-4.14187	4.0572e-05	0.000276918	Female
MAEA	-4.14195	4.0558e-05	0.000276918	Female
EGLN1	-4.14075	4.07629e-05	0.000278112	Female
FGFR1	-4.14066	4.07791e-05	0.000278115	Female
SIGLEC9	-4.1388	4.1099e-05	0.000280078	Female
C19orf38	-4.13827	4.11916e-05	0.000280491	Female
TMEM30B	-4.13792	4.12522e-05	0.000280794	Female
MKNK2	-4.13635	4.15254e-05	0.000282434	Female
GNG13	-4.13586	4.16119e-05	0.000282912	Female
GCNT3	-4.13303	4.21093e-05	0.000286183	Female
MMP25	-4.13229	4.22404e-05	0.00028678	Female
SASH3	-4.13094	4.24806e-05	0.000288147	Female
UQCR10	-4.12744	4.3111e-05	0.000291745	Female
CCR2	-4.12706	4.31786e-05	0.000291751	Female
ENTPD8	-4.1209	4.43104e-05	0.000298248	Female
PLAUR	-4.11962	4.45489e-05	0.000299278	Female
PTRF	-4.11627	4.51799e-05	0.000302935	Female
ALPI	-4.11533	4.53572e-05	0.000304008	Female
SDF4	-4.11319	4.57667e-05	0.000306635	Female
PKM2	-4.11199	4.59967e-05	0.000307941	Female
NAGK	-4.11181	4.60312e-05	0.000308053	Female
NT5E	-4.10978	4.64235e-05	0.000310323	Female
FAM20C	-4.10849	4.6675e-05	0.000311885	Female
KIAA1409	-4.10497	4.73682e-05	0.000315794	Female
RASSF5	-4.10485	4.73908e-05	0.000315825	Female
ANXA1	-4.10416	4.75282e-05	0.000316499	Female
GRAMD1B	-4.10019	4.83233e-05	0.00032094	Female
ATP8B2	-4.09841	4.86841e-05	0.000322846	Female
PAPSS2	-4.09775	4.88177e-05	0.000323609	Female
SLC7A2	-4.09372	4.96468e-05	0.000328856	Female
LILRP2	-4.09219	4.99638e-05	0.000330581	Female
KLHL22	-4.09092	5.02295e-05	0.000331989	Female
RPS6KA1	-4.0909	5.02336e-05	0.000331989	Female
GPR137	-4.09041	5.03367e-05	0.000332545	Female
PFKL	-4.0902	5.03804e-05	0.000332709	Female
FAM129A	-4.08981	5.04628e-05	0.00033275	Female
CALHM2	-4.08877	5.06815e-05	0.000333815	Female
LDHD	-4.08812	5.08182e-05	0.00033459	Female
TCP11L2	-4.08638	5.11879e-05	0.000336897	Female
GAS7	-4.08565	5.13451e-05	0.000337805	Female
APBB1IP	-4.08531	5.14179e-05	0.000338157	Female
P4HA2	-4.08197	5.21382e-05	0.000342371	Female
UST	-4.08188	5.21564e-05	0.000342371	Female
ZFYVE28	-4.0811	5.2326e-05	0.000343226	Female
MYOM1	-4.08078	5.23954e-05	0.00034344	Female
NCKAP1L	-4.08077	5.23978e-05	0.00034344	Female
PDE2A	-4.08013	5.25387e-05	0.000344235	Female
SEC13	-4.07896	5.2795e-05	0.000345608	Female
CDKN1C	-4.07832	5.29358e-05	0.000346318	Female
CRAT	-4.0775	5.31146e-05	0.000347358	Female
NBL1	-4.0764	5.33582e-05	0.000348691	Female
UQCRC1	-4.07556	5.35448e-05	0.000349518	Female
ABHD5	-4.07324	5.40638e-05	0.000352512	Female
TNFSF13	-4.07278	5.41672e-05	0.000353055	Female
FFAR2	-4.0723	5.42756e-05	0.00035363	Female
CASP9	-4.07184	5.43798e-05	0.000354	Female
TUBB2B	-4.06957	5.48944e-05	0.000356864	Female
HBA1	-4.06828	5.51895e-05	0.00035865	Female
C16orf89	-4.06643	5.56151e-05	0.000361148	Female
UPP1	-4.0662	5.56686e-05	0.000361361	Female
SYNGR1	-4.06545	5.58403e-05	0.000362341	Female
SH2D3C	-4.06502	5.59416e-05	0.000362729	Female
CALB2	-4.06466	5.60242e-05	0.000363131	Female
MKL1	-4.06426	5.61175e-05	0.000363466	Female
CYP26B1	-4.06354	5.62841e-05	0.000364411	Female
S100A16	-4.06118	5.68374e-05	0.000367043	Female
SMAD2	-4.06041	5.702e-05	0.000368086	Female
CTSW	-4.05899	5.73556e-05	0.000369707	Female
RERGL	-4.05886	5.73873e-05	0.000369775	Female
GYPC	-4.05874	5.74148e-05	0.000369816	Female
KCNK6	-4.05758	5.76934e-05	0.000371201	Female
MFN2	-4.05687	5.78615e-05	0.000372009	Female
NIPA1	-4.05617	5.80298e-05	0.000372817	Female
PLAC8	-4.05625	5.80109e-05	0.000372817	Female
TBC1D10C	-4.05517	5.82706e-05	0.00037409	Female
CD180	-4.05377	5.86098e-05	0.000375854	Female
ARHGAP30	-4.05251	5.89159e-05	0.000377402	Female
PPP2R2D	-4.05224	5.89826e-05	0.000377553	Female
CFP	-4.05214	5.9005e-05	0.000377558	Female
CHP	-4.05139	5.91886e-05	0.000378457	Female
SGK269	-4.05147	5.91688e-05	0.000378457	Female
PRF1	-4.0511	5.92612e-05	0.000378602	Female
MED15	-4.04962	5.96232e-05	0.000380402	Female
MAPK11	-4.04352	6.11463e-05	0.000388562	Female
CORO1A	-4.0431	6.12516e-05	0.00038909	Female
RNF10	-4.04238	6.14339e-05	0.000389824	Female
MYO1F	-4.0419	6.15551e-05	0.00039031	Female
HSD17B1	-4.04117	6.17422e-05	0.000391354	Female
ABCA3	-4.0399	6.2065e-05	0.000393116	Female
C2orf72	-4.03993	6.20594e-05	0.000393116	Female
SIGLEC7	-4.03959	6.21443e-05	0.000393333	Female
ABLIM3	-4.03941	6.21928e-05	0.00039346	Female
TRIM3	-4.03924	6.22345e-05	0.000393478	Female
CORO2B	-4.03679	6.28681e-05	0.000396767	Female
NRGN	-4.03664	6.2905e-05	0.000396857	Female
CLTB	-4.03646	6.29517e-05	0.000397008	Female
SPRR1B	-4.03498	6.33388e-05	0.000399018	Female
TMEM130	-4.03179	6.4176e-05	0.000404002	Female
GIMAP5	-4.03046	6.45296e-05	0.00040579	Female
GAS1	-4.02913	6.4882e-05	0.000407859	Female
PTH1R	-4.02784	6.52283e-05	0.000409595	Female
WDR37	-4.02546	6.58703e-05	0.000413182	Female
PPP4R1	-4.02485	6.60359e-05	0.000413924	Female
STIM2	-4.02401	6.62644e-05	0.000415208	Female
AGAP2	-4.02306	6.65234e-05	0.000416681	Female
GABARAP	-4.02288	6.65715e-05	0.000416834	Female
PARP12	-4.02217	6.67667e-05	0.000417757	Female
ZEB2	-4.02208	6.67913e-05	0.000417761	Female
RER1	-4.02029	6.72836e-05	0.000420691	Female
HLA-DMA	-4.01969	6.74495e-05	0.000421427	Female
TRAPPC1	-4.01789	6.79514e-05	0.000424109	Female
RIOK3	-4.01704	6.81887e-05	0.000425312	Female
CCRN4L	-4.01618	6.843e-05	0.000426033	Female
MARCH3	-4.01604	6.84682e-05	0.000426119	Female
DOCK10	-4.01572	6.85588e-05	0.000426531	Female
PSMD9	-4.01354	6.91759e-05	0.00042976	Female
TMEM106A	-4.01362	6.91517e-05	0.00042976	Female
APOL4	-4.01059	7.00172e-05	0.000434309	Female
IL10	-4.01054	7.00322e-05	0.000434309	Female
HYAL1	-4.00961	7.02992e-05	0.000435656	Female
PLP1	-4.00933	7.03794e-05	0.000435932	Female
MUC6	-4.0084	7.06493e-05	0.000437361	Female
TAOK2	-4.00645	7.12144e-05	0.000439926	Female
SCN4B	-4.00592	7.13706e-05	0.00044058	Female
C14orf139	-4.00572	7.143e-05	0.000440791	Female
KIRREL3	-4.00458	7.17624e-05	0.000442487	Female
RGL4	-4.00066	7.29254e-05	0.0004487	Female
EVI2B	-3.99969	7.32131e-05	0.00045005	Female
SLC37A2	-3.99892	7.3446e-05	0.000451164	Female
C6orf122	-3.99575	7.44042e-05	0.000456091	Female
MKNK1	-3.99427	7.48558e-05	0.000458057	Female
SEC14L1	-3.9925	7.53984e-05	0.000460894	Female
ACAP1	-3.9922	7.54909e-05	0.000461137	Female
SREBF1	-3.99179	7.56162e-05	0.000461741	Female
MPI	-3.99168	7.56515e-05	0.000461796	Female
PTGER4	-3.9913	7.57697e-05	0.000462356	Female
MAPK1	-3.99024	7.60957e-05	0.000464022	Female
GFI1B	-3.98839	7.66743e-05	0.000467387	Female
CRIP1	-3.98652	7.72612e-05	0.000470637	Female
GNG3	-3.98605	7.74088e-05	0.000471208	Female
FOXA1	-3.98519	7.76831e-05	0.00047255	Female
VAMP5	-3.98501	7.7739e-05	0.000472726	Female
PLCD1	-3.98463	7.78604e-05	0.000473135	Female
TLR9	-3.98445	7.79171e-05	0.000473315	Female
RET	-3.98406	7.80414e-05	0.000473742	Female
GATA3	-3.98367	7.81637e-05	0.00047432	Female
PALLD	-3.98355	7.82036e-05	0.000474397	Female
FLVCR2	-3.98108	7.89944e-05	0.000478366	Female
HSPA12B	-3.9808	7.90859e-05	0.000478754	Female
ZNF407	-3.97987	7.93842e-05	0.000480062	Female
SCIN	-3.9752	8.09094e-05	0.000487433	Female
NLRC3	-3.97323	8.15602e-05	0.000491185	Female
ZNF516	-3.97207	8.19463e-05	0.000493171	Female
MAP4K1	-3.9715	8.21356e-05	0.00049397	Female
C11orf86	-3.9688	8.30437e-05	0.000498575	Female
SERTAD4	-3.96836	8.31899e-05	0.000499111	Female
HLA-DMB	-3.9669	8.36871e-05	0.00050175	Female
PDLIM7	-3.96467	8.44464e-05	0.000505783	Female
ASB2	-3.96404	8.46644e-05	0.000506915	Female
GATSL3	-3.96162	8.55012e-05	0.0005114	Female
PLCG2	-3.96062	8.58461e-05	0.000513288	Female
DENND3	-3.95933	8.62994e-05	0.000515822	Female
SEMA3E	-3.95754	8.6925e-05	0.000518853	Female
GIMAP6	-3.95676	8.72035e-05	0.000520161	Female
PKIB	-3.95549	8.76511e-05	0.000522475	Female
RARRES3	-3.95549	8.76504e-05	0.000522475	Female
GIMAP8	-3.95485	8.7879e-05	0.000523655	Female
BMX	-3.9547	8.79338e-05	0.000523803	Female
TMEM107	-3.95393	8.82073e-05	0.000525253	Female
AP2M1	-3.95383	8.82419e-05	0.000525281	Female
SLC29A4	-3.95356	8.83418e-05	0.000525534	Female
BTG1	-3.95262	8.86785e-05	0.000527342	Female
HMOX1	-3.95177	8.89847e-05	0.000528803	Female
NCF2	-3.95076	8.93471e-05	0.000530777	Female
SLC25A34	-3.94819	9.02828e-05	0.000535246	Female
EDEM1	-3.94773	9.04498e-05	0.000536054	Female
HK3	-3.94461	9.15978e-05	0.000541826	Female
XPNPEP1	-3.94458	9.16093e-05	0.000541826	Female
CRTAM	-3.94353	9.19989e-05	0.000543946	Female
CD200R1	-3.94341	9.20432e-05	0.000544024	Female
FGD2	-3.9433	9.20841e-05	0.000544083	Female
CIDEB	-3.94318	9.21309e-05	0.000544176	Female
HADHB	-3.9429	9.22357e-05	0.00054461	Female
CHGA	-3.94179	9.2648e-05	0.000546676	Female
SIGLEC10	-3.9407	9.30599e-05	0.000548737	Female
MAL	-3.93873	9.37999e-05	0.000551152	Female
STX11	-3.93871	9.38102e-05	0.000551152	Female
VASP	-3.93887	9.37497e-05	0.000551152	Female
IL1R1	-3.93832	9.39565e-05	0.000551793	Female
SOX17	-3.9377	9.41915e-05	0.000552804	Female
ARHGAP9	-3.93557	9.50054e-05	0.000556791	Female
HTR3E	-3.93551	9.50301e-05	0.000556791	Female
PTTG1IP	-3.93551	9.50295e-05	0.000556791	Female
BAHD1	-3.934	9.56115e-05	0.00056001	Female
SSTR2	-3.93314	9.59429e-05	0.0005612	Female
CD300LF	-3.92928	9.74462e-05	0.000568591	Female
GNAO1	-3.9294	9.74015e-05	0.000568591	Female
NCF1C	-3.92923	9.74663e-05	0.000568591	Female
RASA3	-3.92594	9.87658e-05	0.000575788	Female
DHRS9	-3.92538	9.89916e-05	0.000576913	Female
DAPP1	-3.9243	9.94201e-05	0.000578832	Female
TMBIM1	-3.92143	0.000100575	0.000584971	Female
MOV10	-3.92027	0.000101049	0.00058705	Female
VIP	-3.92035	0.000101015	0.00058705	Female
IKZF3	-3.91755	0.000102158	0.000592211	Female
GPR171	-3.91706	0.000102359	0.000592983	Female
HOXB4	-3.91466	0.000103351	0.000597546	Female
KHDRBS2	-3.91298	0.000104051	0.000600996	Female
HSPA4L	-3.91184	0.00010453	0.00060297	Female
SPIB	-3.91137	0.000104728	0.000603913	Female
NCOA1	-3.91122	0.000104791	0.000604072	Female
LILRB2	-3.90921	0.000105639	0.000608363	Female
AP2A2	-3.90801	0.000106148	0.00061049	Female
MYOCD	-3.90707	0.000106551	0.000612605	Female
CYP2C18	-3.90566	0.000107153	0.000615863	Female
CAPN5	-3.90524	0.000107333	0.000616697	Female
KCNMA1	-3.90514	0.000107379	0.000616758	Female
GAP43	-3.90467	0.000107579	0.000617705	Female
CTNS	-3.90323	0.000108201	0.000620465	Female
PNPLA2	-3.90313	0.000108246	0.000620521	Female
PPAP2A	-3.90256	0.000108493	0.000621612	Female
TYMP	-3.90103	0.000109163	0.000624547	Female
GRN	-3.9006	0.00010935	0.000625415	Female
CSRP1	-3.89974	0.000109728	0.000626758	Female
CD27	-3.89801	0.000110491	0.000630294	Female
SEZ6	-3.89709	0.000110897	0.000631989	Female
GPRC5A	-3.89674	0.000111054	0.000632633	Female
NTN4	-3.89573	0.000111503	0.000634413	Female
GNLY	-3.89558	0.000111568	0.000634573	Female
TMEM63B	-3.89423	0.000112173	0.000637394	Female
TIMP2	-3.89313	0.000112668	0.000639584	Female
C12orf72	-3.89201	0.000113174	0.00064164	Female
C5orf20	-3.89153	0.00011339	0.000642641	Female
NEDD9	-3.88925	0.00011443	0.000647485	Female
NEURL	-3.88916	0.00011447	0.000647503	Female
BCR	-3.88662	0.000115638	0.000653479	Female
C11orf21	-3.88478	0.000116492	0.000657665	Female
LASP1	-3.8831	0.000117274	0.00066187	Female
AMPH	-3.88266	0.000117481	0.000662185	Female
TRAK1	-3.8827	0.000117462	0.000662185	Female
RUNX3	-3.88235	0.000117628	0.000662797	Female
SIPA1L3	-3.88149	0.000118033	0.000664863	Female
GJB5	-3.88055	0.000118476	0.000666934	Female
PLXNC1	-3.87992	0.000118773	0.000668173	Female
HTR3A	-3.87973	0.000118863	0.000668382	Female
PTPRCAP	-3.8788	0.000119305	0.000670304	Female
LDOC1	-3.87818	0.0001196	0.00067175	Female
C22orf13	-3.87798	0.000119696	0.000672071	Female
F3	-3.87545	0.000120907	0.000678434	Female
MAST3	-3.87481	0.000121217	0.000679956	Female
EDN2	-3.87394	0.000121637	0.000681657	Female
STAT2	-3.87361	0.000121798	0.000682344	Female
GNB3	-3.87232	0.000122424	0.00068532	Female
IGSF6	-3.87227	0.000122447	0.00068532	Female
ZFYVE21	-3.8718	0.000122679	0.0006864	Female
SH2D7	-3.86895	0.000124079	0.00069328	Female
CD300LB	-3.86859	0.000124254	0.000693657	Female
TIAM1	-3.86822	0.000124438	0.000694465	Female
PECI	-3.86435	0.000126366	0.000704551	Female
GADD45A	-3.86368	0.000126703	0.000705979	Female
DKFZp761E198	-3.86191	0.000127597	0.000710281	Female
TLR3	-3.86195	0.00012758	0.000710281	Female
CD109	-3.86142	0.000127849	0.000711234	Female
SLC8A3	-3.86054	0.000128295	0.000713262	Female
SYT17	-3.86046	0.000128336	0.000713262	Female
GBP2	-3.8589	0.000129131	0.000716773	Female
PSD	-3.85898	0.000129093	0.000716773	Female
FRMD8	-3.85853	0.00012932	0.000717147	Female
LY9	-3.85864	0.000129266	0.000717147	Female
AKR7A2	-3.85807	0.000129558	0.000718232	Female
NDUFA6	-3.85771	0.000129743	0.000718799	Female
HIC1	-3.85577	0.000130749	0.000723918	Female
MB	-3.85453	0.000131394	0.000726902	Female
PSTPIP1	-3.85305	0.000132166	0.000730133	Female
TMEM132B	-3.85253	0.000132436	0.000730482	Female
CAPN1	-3.85168	0.000132883	0.000732487	Female
NLGN2	-3.85048	0.000133519	0.000735531	Female
GZMM	-3.84953	0.000134023	0.000738076	Female
RAPGEF3	-3.84941	0.000134087	0.000738194	Female
LRRC4B	-3.84591	0.000135955	0.000747538	Female
BTBD7	-3.84523	0.000136322	0.000748809	Female
MMP23A	-3.84469	0.000136614	0.000749987	Female
LYVE1	-3.84427	0.00013684	0.000750757	Female
SCO1	-3.8433	0.000137366	0.000752933	Female
AOC3	-3.84257	0.000137767	0.00075442	Female
ARSA	-3.84159	0.000138301	0.000757109	Female
ARF6	-3.8402	0.000139061	0.000759699	Female
BCL9L	-3.8404	0.000138955	0.000759699	Female
COL6A2	-3.84016	0.000139087	0.000759699	Female
GPER	-3.84002	0.000139165	0.000759699	Female
PLCXD3	-3.84032	0.000138995	0.000759699	Female
VIM	-3.8371	0.000140778	0.000766412	Female
COQ4	-3.83498	0.00014196	0.000771832	Female
GPNMB	-3.83446	0.000142255	0.000772983	Female
MAP2	-3.83445	0.00014226	0.000772983	Female
FLCN	-3.83411	0.00014245	0.000773763	Female
GNB5	-3.8335	0.000142794	0.000774921	Female
ATP2B4	-3.83338	0.000142864	0.000775059	Female
GLI3	-3.83285	0.00014316	0.000776188	Female
IL21R	-3.83288	0.000143144	0.000776188	Female
CD86	-3.83202	0.000143631	0.000778018	Female
HS3ST3B1	-3.8315	0.000143925	0.000779125	Female
AMIGO3	-3.82891	0.000145402	0.0007862	Female
MNT	-3.82553	0.000147354	0.000794986	Female
RAB3A	-3.82513	0.000147588	0.000796003	Female
WDFY4	-3.82485	0.000147751	0.000796637	Female
PLD3	-3.82362	0.000148467	0.000800003	Female
TEX11	-3.82321	0.000148709	0.000800567	Female
TRIM21	-3.82326	0.00014868	0.000800567	Female
RTN1	-3.82301	0.000148823	0.000800725	Female
RXRA	-3.823	0.00014883	0.000800725	Female
NRP1	-3.82288	0.000148903	0.000800876	Female
CBFA2T3	-3.82211	0.000149352	0.000802505	Female
FICD	-3.82205	0.00014939	0.000802505	Female
SMYD4	-3.82073	0.000150168	0.000805946	Female
LONRF2	-3.8168	0.00015251	0.000817509	Female
ZNF784	-3.81668	0.000152578	0.000817626	Female
PIP5K1C	-3.8162	0.00015287	0.000818938	Female
CYBB	-3.81592	0.000153038	0.000819592	Female
MXI1	-3.81569	0.000153177	0.000819892	Female
TENC1	-3.81567	0.000153188	0.000819892	Female
MAP7D1	-3.81346	0.000154524	0.000826167	Female
CYSLTR2	-3.81327	0.000154641	0.000826402	Female
KCNMB1	-3.81227	0.000155249	0.000829147	Female
TLE4	-3.81233	0.000155213	0.000829147	Female
DUSP7	-3.8094	0.000157005	0.000835502	Female
NR3C2	-3.80969	0.000156827	0.000835502	Female
SEMA3B	-3.80974	0.0001568	0.000835502	Female
FAM63B	-3.80882	0.000157364	0.000837122	Female
SH2D1B	-3.80699	0.000158502	0.000841895	Female
DCI	-3.80624	0.000158968	0.000844118	Female
FGR	-3.80566	0.00015933	0.000845782	Female
KIAA2013	-3.80141	0.000162009	0.000858444	Female
LRRC7	-3.80023	0.000162759	0.000861894	Female
APOL1	-3.79834	0.000163971	0.000867002	Female
GNPTAB	-3.79834	0.000163968	0.000867002	Female
PCSK2	-3.79822	0.000164043	0.000867119	Female
HIST1H4A	-3.79803	0.000164169	0.000867525	Female
TAGAP	-3.79769	0.000164384	0.0008684	Female
MTMR10	-3.79693	0.000164876	0.000870209	Female
CASP7	-3.7961	0.000165411	0.000872772	Female
MAP2K4	-3.79572	0.000165661	0.000873605	Female
GRIN1	-3.79356	0.000167066	0.00087991	Female
OSBPL1A	-3.79232	0.000167877	0.000883919	Female
BTN3A3	-3.79182	0.000168206	0.000885335	Female
SLC22A23	-3.79176	0.000168248	0.000885335	Female
TP53INP2	-3.79059	0.000169019	0.000888861	Female
REM1	-3.78971	0.000169603	0.000891665	Female
UBB	-3.78775	0.000170909	0.000897683	Female
CNTN1	-3.78723	0.000171255	0.00089879	Female
SLA2	-3.78661	0.000171669	0.000900364	Female
MYOC	-3.78651	0.000171739	0.000900458	Female
PCDH1	-3.78488	0.000172834	0.000905115	Female
ATP6V0D1	-3.78406	0.00017339	0.000906943	Female
TECPR2	-3.78414	0.000173335	0.000906943	Female
NXN	-3.78323	0.000173954	0.00090962	Female
INSR	-3.78238	0.000174529	0.000912084	Female
GPR162	-3.78027	0.00017597	0.000918792	Female
LHB	-3.78014	0.000176062	0.000918996	Female
ACTG1	-3.77816	0.000177424	0.000924795	Female
PCDHB13	-3.77785	0.000177641	0.000925582	Female
CKMT1A	-3.77755	0.000177849	0.000926393	Female
SOX8	-3.77673	0.000178422	0.000928822	Female
ZNF395	-3.77673	0.00017842	0.000928822	Female
ARHGAP32	-3.77509	0.000179565	0.000934497	Female
SYNPO	-3.77386	0.000180424	0.00093869	Female
PIGS	-3.77268	0.000181258	0.000942185	Female
CRELD2	-3.77192	0.000181795	0.000944696	Female
LGALS3BP	-3.76885	0.000183983	0.000955215	Female
SIAE	-3.76839	0.000184312	0.000956641	Female
IFI30	-3.76746	0.000184982	0.000958983	Female
SIRPG	-3.76653	0.000185653	0.00096189	Female
NUAK1	-3.76576	0.000186206	0.000964186	Female
EBI3	-3.76404	0.000187458	0.000969806	Female
MLPH	-3.76246	0.000188613	0.000974343	Female
ADAM8	-3.76232	0.00018871	0.000974559	Female
VIT	-3.75831	0.000191673	0.000987538	Female
LIMA1	-3.75745	0.000192319	0.000989983	Female
FAM83G	-3.75727	0.000192451	0.000990372	Female
MT1M	-3.75701	0.000192646	0.000990792	Female
SIGLEC8	-3.75703	0.000192629	0.000990792	Female
VPS4B	-3.75685	0.000192763	0.000991103	Female
ATP8B1	-3.75506	0.000194108	0.00099702	Female
SIRPB2	-3.75419	0.000194765	0.000999341	Female
PLA2G2A	-3.75251	0.000196039	0.00100529	Female
KLHL6	-3.74958	0.000198277	0.00101587	Female
TAGLN3	-3.74962	0.000198251	0.00101587	Female
LMOD1	-3.74926	0.000198527	0.00101685	Female
HOXD8	-3.74708	0.000200206	0.00102425	Female
DPT	-3.74679	0.00020043	0.0010251	Female
PSMB10	-3.74659	0.000200589	0.00102562	Female
UCP2	-3.74636	0.00020077	0.00102624	Female
KIAA0802	-3.74518	0.000201687	0.00103033	Female
ADORA2A	-3.74429	0.000202382	0.001033	Female
FAM26F	-3.74426	0.00020241	0.001033	Female
RNF111	-3.7438	0.000202771	0.00103435	Female
CD8A	-3.74323	0.000203216	0.00103633	Female
SUFU	-3.74298	0.000203409	0.00103701	Female
TLR8	-3.74265	0.000203673	0.00103805	Female
SLC17A7	-3.74229	0.000203958	0.0010389	Female
ISL2	-3.7415	0.000204583	0.00104123	Female
RHOH	-3.74162	0.000204482	0.00104123	Female
ARSJ	-3.74077	0.000205159	0.0010432	Female
TRAF3IP2	-3.73962	0.00020607	0.00104752	Female
THBD	-3.73796	0.000207401	0.00105368	Female
PADI2	-3.7371	0.000208087	0.00105686	Female
KRT86	-3.73692	0.000208233	0.00105698	Female
RIMKLA	-3.73513	0.000209679	0.00106402	Female
COLEC12	-3.7337	0.000210845	0.00106931	Female
NIPAL3	-3.73346	0.000211041	0.00106999	Female
BIN3	-3.73245	0.000211858	0.00107259	Female
ADCY4	-3.73091	0.000213126	0.00107807	Female
DUSP6	-3.73019	0.000213717	0.00108074	Female
FNTB	-3.7293	0.00021445	0.00108383	Female
MS4A8B	-3.72897	0.000214726	0.0010846	Female
PTPN21	-3.72901	0.000214695	0.0010846	Female
WDR81	-3.72744	0.000215994	0.00109069	Female
SCO2	-3.72713	0.000216256	0.00109169	Female
TRNP1	-3.72631	0.000216941	0.0010942	Female
VPS13D	-3.72441	0.000218535	0.00110129	Female
TACR2	-3.72392	0.000218948	0.00110306	Female
RAP1GAP2	-3.72383	0.000219021	0.00110311	Female
CRIP2	-3.72302	0.000219712	0.00110627	Female
ARC	-3.72191	0.000220649	0.00111003	Female
VWF	-3.72182	0.000220724	0.00111009	Female
MT1F	-3.72113	0.000221317	0.00111275	Female
HOXC8	-3.72071	0.000221674	0.00111423	Female
MYOF	-3.72051	0.000221841	0.00111474	Female
LDOC1L	-3.72036	0.000221974	0.00111499	Female
NAT1	-3.71993	0.000222338	0.00111628	Female
TWSG1	-3.71842	0.000223634	0.00112086	Female
TSHZ2	-3.7164	0.000225377	0.00112863	Female
PLCE1	-3.71591	0.000225809	0.00113018	Female
GZMA	-3.71557	0.0002261	0.00113118	Female
TMEM54	-3.71552	0.000226145	0.00113118	Female
SLC27A4	-3.71544	0.000226214	0.0011312	Female
PKNOX1	-3.71503	0.000226569	0.00113265	Female
MS4A4A	-3.71332	0.000228068	0.00113949	Female
RSPH3	-3.71194	0.000229278	0.00114489	Female
HLA-DRB5	-3.71181	0.000229393	0.00114509	Female
LAMB3	-3.71167	0.000229515	0.00114509	Female
ARSD	-3.71069	0.000230378	0.00114907	Female
RTN2	-3.71041	0.000230627	0.00114965	Female
GLI2	-3.70951	0.000231426	0.00115298	Female
PDCD1	-3.70876	0.000232099	0.00115555	Female
FGFBP2	-3.70844	0.000232382	0.0011564	Female
SLA	-3.70758	0.000233153	0.0011596	Female
CLEC3B	-3.70342	0.000236903	0.00117558	Female
LILRA2	-3.70327	0.000237041	0.00117593	Female
CD163	-3.70297	0.000237312	0.00117694	Female
AMN	-3.69971	0.000240298	0.00119093	Female
RSPO3	-3.69835	0.000241553	0.00119527	Female
PTPRF	-3.69736	0.00024247	0.00119879	Female
PCBP1	-3.69595	0.000243782	0.00120426	Female
FURIN	-3.6957	0.00024402	0.00120509	Female
FCGR2C	-3.69382	0.000245774	0.00121211	Female
LRRC8A	-3.69381	0.000245787	0.00121211	Female
ZNF385B	-3.69382	0.000245779	0.00121211	Female
AGPAT9	-3.6929	0.000246642	0.00121564	Female
C11orf90	-3.69279	0.000246748	0.00121582	Female
PRAM1	-3.69267	0.000246863	0.00121587	Female
ZBTB7B	-3.69263	0.000246896	0.00121587	Female
N4BP1	-3.69184	0.000247648	0.00121923	Female
SH3BP1	-3.69122	0.000248235	0.00122178	Female
IFT122	-3.69034	0.000249072	0.00122521	Female
SPAG7	-3.69037	0.000249043	0.00122521	Female
IL1RN	-3.68871	0.000250631	0.00123218	Female
C5AR1	-3.68745	0.000251834	0.00123706	Female
SCN2B	-3.68566	0.00025357	0.00124384	Female
TNXB	-3.68325	0.000255917	0.00125359	Female
CFH	-3.68224	0.000256905	0.00125808	Female
SMPD1	-3.68187	0.000257261	0.00125947	Female
GNAI1	-3.68084	0.000258279	0.00126385	Female
DUSP5	-3.67945	0.000259647	0.00126902	Female
CHCHD10	-3.67906	0.000260042	0.00127024	Female
MBOAT7	-3.67245	0.000266669	0.00129863	Female
PIGR	-3.67213	0.000266996	0.00129986	Female
CD96	-3.67056	0.000268599	0.00130694	Female
S1PR4	-3.67003	0.000269142	0.00130885	Female
MXD1	-3.66979	0.000269385	0.00130931	Female
ZNF592	-3.66869	0.000270519	0.0013139	Female
EIF5AL1	-3.66851	0.000270707	0.00131427	Female
CIC	-3.66504	0.000274294	0.00132985	Female
ADC	-3.66488	0.000274462	0.00133029	Female
SERTAD2	-3.66435	0.000275017	0.00133261	Female
SSTR1	-3.66329	0.000276131	0.00133653	Female
TGFA	-3.66281	0.00027663	0.00133857	Female
CD2	-3.66142	0.000278104	0.00134496	Female
PRKCDBP	-3.66021	0.000279379	0.00134926	Female
PI4KA	-3.65902	0.000280641	0.00135461	Female
SAMD9L	-3.65822	0.000281499	0.00135838	Female
MTUS1	-3.65741	0.000282368	0.00136182	Female
BAI3	-3.65577	0.000284127	0.00136955	Female
LAT2	-3.65462	0.00028537	0.00137403	Female
CDC42BPG	-3.65447	0.000285539	0.00137409	Female
GPX3	-3.65438	0.000285634	0.00137417	Female
C20orf194	-3.65348	0.000286607	0.00137754	Female
ATP6V0D2	-3.6527	0.000287461	0.00138044	Female
TSPAN3	-3.65269	0.000287466	0.00138044	Female
IRF1	-3.6519	0.000288328	0.00138295	Female
WARS	-3.65073	0.000289616	0.0013876	Female
C14orf49	-3.65057	0.00028979	0.00138768	Female
RGS12	-3.65031	0.000290072	0.00138827	Female
KCTD9	-3.64721	0.000293498	0.00140275	Female
ACP5	-3.64647	0.000294323	0.00140607	Female
GNA14	-3.64637	0.000294433	0.00140607	Female
ZIK1	-3.64623	0.000294585	0.00140641	Female
KLK11	-3.6422	0.000299123	0.00142691	Female
MGRN1	-3.64134	0.000300097	0.00143038	Female
GNAQ	-3.64124	0.000300207	0.00143052	Female
BCL2	-3.64098	0.000300501	0.00143153	Female
TOX2	-3.64043	0.000301129	0.00143374	Female
ODZ3	-3.6393	0.000302421	0.0014395	Female
FAM135B	-3.63854	0.000303283	0.00144321	Female
PHYHIP	-3.63813	0.000303753	0.00144505	Female
HSPG2	-3.63767	0.00030429	0.00144722	Female
CADM3	-3.6375	0.000304479	0.00144772	Female
SLAMF7	-3.63588	0.000306346	0.00145541	Female
AMH	-3.63552	0.000306769	0.00145703	Female
BAK1	-3.6335	0.000309118	0.00146619	Female
ILK	-3.63332	0.00030932	0.00146676	Female
CCDC134	-3.63298	0.000309717	0.00146824	Female
CDC42EP2	-3.63228	0.000310543	0.00147057	Female
SLC25A23	-3.63069	0.000312406	0.00147794	Female
TNFAIP8	-3.62985	0.000313402	0.0014821	Female
FCRL6	-3.62903	0.00031437	0.00148547	Female
HOXC10	-3.628	0.000315597	0.00149047	Female
MMP15	-3.62676	0.000317079	0.00149626	Female
RCSD1	-3.62644	0.000317454	0.00149762	Female
DBN1	-3.62487	0.000319336	0.00150569	Female
JPH2	-3.62373	0.000320712	0.00151165	Female
HAVCR2	-3.62301	0.000321587	0.00151385	Female
ELL2	-3.62244	0.00032228	0.00151671	Female
EMR3	-3.62218	0.000322591	0.00151736	Female
LPAR5	-3.62223	0.000322534	0.00151736	Female
LCP1	-3.62186	0.000322982	0.00151879	Female
ABCA9	-3.61853	0.000327057	0.00153671	Female
RGAG4	-3.61722	0.000328668	0.00154304	Female
TADA2B	-3.6168	0.00032919	0.00154466	Female
SLC36A1	-3.61508	0.000331331	0.00155346	Female
ELAC2	-3.6139	0.000332797	0.00155992	Female
C4orf34	-3.61127	0.000336104	0.00157331	Female
F2RL1	-3.61071	0.000336816	0.00157622	Female
CD3E	-3.60966	0.000338147	0.0015816	Female
LPCAT4	-3.60701	0.000341517	0.00159566	Female
CHST2	-3.60627	0.000342465	0.00159966	Female
C21orf88	-3.60501	0.000344099	0.00160687	Female
MUC1	-3.60487	0.000344278	0.00160711	Female
KCNK3	-3.60342	0.000346149	0.00161472	Female
HOMER2	-3.60307	0.000346605	0.00161598	Female
GTPBP1	-3.60254	0.0003473	0.00161879	Female
SEC24C	-3.60206	0.000347915	0.0016208	Female
TMEM200B	-3.60188	0.000348155	0.00162148	Female
ACAA1	-3.60167	0.000348428	0.00162189	Female
HLA-DQA2	-3.59913	0.000351754	0.00163607	Female
PRKCD	-3.59893	0.000352023	0.00163689	Female
ABHD14A	-3.59843	0.000352689	0.00163911	Female
CDC42EP4	-3.59824	0.000352934	0.00163981	Female
MYH9	-3.59784	0.000353466	0.00164185	Female
CHRD	-3.59772	0.000353617	0.00164212	Female
HEPACAM2	-3.59759	0.000353792	0.00164249	Female
FBLN1	-3.59546	0.000356623	0.00165344	Female
SUN2	-3.59515	0.000357045	0.00165389	Female
IQGAP2	-3.59494	0.000357316	0.00165447	Female
ADRA2A	-3.59438	0.000358071	0.00165621	Female
PITPNM3	-3.5944	0.000358046	0.00165621	Female
MAST2	-3.59406	0.000358499	0.00165687	Female
C21orf33	-3.59302	0.000359896	0.00166119	Female
TIFAB	-3.59239	0.000360749	0.00166464	Female
MS4A7	-3.59046	0.000363355	0.00167534	Female
UNC13A	-3.59013	0.000363806	0.00167698	Female
LMAN2	-3.58936	0.000364854	0.00168092	Female
OGDH	-3.58799	0.000366729	0.00168911	Female
CYTSB	-3.58747	0.000367435	0.00169148	Female
FRMD3	-3.5852	0.000370566	0.00170281	Female
YWHAH	-3.58474	0.000371204	0.00170479	Female
MAMLD1	-3.58392	0.000372341	0.00170867	Female
ANO2	-3.58358	0.00037281	0.00170992	Female
PPP2R2B	-3.57788	0.000380829	0.00174169	Female
CLPTM1	-3.57709	0.000381948	0.00174589	Female
DPP4	-3.57513	0.000384749	0.00175686	Female
SLC25A11	-3.57357	0.000386985	0.00176615	Female
IRF2	-3.57338	0.000387259	0.00176694	Female
SH3BGRL3	-3.57272	0.000388218	0.00177085	Female
MOBKL2B	-3.57217	0.000389007	0.00177399	Female
XDH	-3.57203	0.000389208	0.00177444	Female
DHX58	-3.5718	0.00038955	0.00177554	Female
LOC90586	-3.57124	0.000390354	0.00177874	Female
DYNC1H1	-3.57032	0.000391701	0.00178395	Female
SPOCK3	-3.56989	0.000392321	0.00178631	Female
MYO5A	-3.56894	0.000393711	0.00179124	Female
SMCR8	-3.56884	0.00039386	0.00179146	Female
FXYD1	-3.56872	0.000394039	0.0017918	Female
TNS1	-3.5666	0.000397146	0.00180406	Female
MRAS	-3.56596	0.000398094	0.00180789	Female
CYB5D1	-3.5656	0.000398629	0.00180912	Female
PYGM	-3.56562	0.000398602	0.00180912	Female
ATL3	-3.56537	0.000398974	0.00181001	Female
SLC6A12	-3.56086	0.000405717	0.0018349	Female
SLIT3	-3.56046	0.000406312	0.00183711	Female
TAT	-3.56008	0.000406887	0.00183877	Female
CRTAC1	-3.56	0.000407005	0.00183882	Female
EPOR	-3.5587	0.000408978	0.00184726	Female
C15orf38	-3.55727	0.000411148	0.00185563	Female
ADAMTSL4	-3.55513	0.000414423	0.001868	Female
IL9R	-3.55464	0.000415188	0.00187	Female
SIPA1L2	-3.55444	0.000415488	0.00187039	Female
S100A14	-3.55427	0.000415753	0.0018711	Female
FLJ42627	-3.55399	0.000416188	0.00187258	Female
NPNT	-3.55347	0.00041699	0.00187571	Female
SNAP25	-3.55239	0.000418661	0.00188274	Female
STYK1	-3.55227	0.000418844	0.00188308	Female
FYB	-3.55204	0.000419204	0.00188421	Female
IRF4	-3.55121	0.000420491	0.00188854	Female
MED9	-3.55121	0.000420483	0.00188854	Female
PTGS1	-3.54755	0.000426233	0.00191139	Female
CP	-3.54742	0.000426427	0.00191177	Female
CCBE1	-3.5472	0.000426775	0.00191284	Female
KIAA0513	-3.54644	0.000427988	0.00191542	Female
SGK1	-3.54654	0.00042782	0.00191542	Female
SLC31A2	-3.5466	0.000427725	0.00191542	Female
CYTSA	-3.54348	0.000432695	0.00193541	Female
ATOH1	-3.54312	0.000433268	0.00193748	Female
TEP1	-3.541	0.000436678	0.00195123	Female
PLD2	-3.54092	0.000436804	0.00195129	Female
EDN3	-3.54047	0.000437528	0.00195403	Female
SH3KBP1	-3.53999	0.000438309	0.00195652	Female
ALDH3A2	-3.53833	0.000441006	0.00196692	Female
C1QTNF2	-3.5381	0.000441379	0.00196722	Female
ATP8B3	-3.53777	0.000441917	0.00196861	Female
SEPT1	-3.53481	0.000446773	0.00198822	Female
UGCG	-3.53481	0.000446766	0.00198822	Female
CHRM4	-3.53397	0.000448156	0.00199387	Female
A1BG	-3.53367	0.000448656	0.00199508	Female
DTX1	-3.53369	0.000448616	0.00199508	Female
CLIP4	-3.53339	0.00044911	0.00199622	Female
KBTBD4	-3.53297	0.000449813	0.00199819	Female
SMPDL3A	-3.53302	0.000449729	0.00199819	Female
PCDHGA9	-3.53247	0.000450639	0.00200135	Female
MFAP4	-3.53019	0.000454441	0.00201722	Female
ZIC5	-3.52916	0.000456167	0.00202334	Female
OSTalpha	-3.5276	0.000458812	0.00203198	Female
LOC388242	-3.52594	0.000461613	0.00204335	Female
POLDIP3	-3.52516	0.000462937	0.00204797	Female
ZNF618	-3.52409	0.000464778	0.00205425	Female
ABCA8	-3.52353	0.000465736	0.00205705	Female
PCDHB8	-3.52351	0.000465765	0.00205705	Female
MIDN	-3.52289	0.000466828	0.00206019	Female
WSCD2	-3.52247	0.000467551	0.00206286	Female
ICOSLG	-3.52201	0.000468336	0.00206528	Female
CRADD	-3.5212	0.000469737	0.00207093	Female
EVC2	-3.52104	0.000470009	0.00207161	Female
ANGPTL7	-3.52079	0.000470441	0.002073	Female
IRX3	-3.51974	0.000472269	0.00208053	Female
TMEM220	-3.51827	0.000474822	0.00208967	Female
COL6A1	-3.51703	0.000476992	0.00209764	Female
RAB1B	-3.51615	0.000478545	0.00210394	Female
TMCO4	-3.51427	0.00048185	0.00211689	Female
COPG	-3.51398	0.000482362	0.00211758	Female
SGCA	-3.5139	0.000482506	0.00211763	Female
CKMT1B	-3.51266	0.000484703	0.00212466	Female
NEURL4	-3.51262	0.000484789	0.00212466	Female
STAC2	-3.51186	0.00048613	0.00212927	Female
CYTH1	-3.51137	0.000487016	0.00213223	Female
PCDHA11	-3.51135	0.000487049	0.00213223	Female
FZD5	-3.51127	0.000487193	0.00213232	Female
DLL1	-3.51076	0.000488097	0.00213521	Female
MUC4	-3.51055	0.000488475	0.00213547	Female
TLR7	-3.51059	0.000488414	0.00213547	Female
P2RY12	-3.50993	0.000489591	0.00213842	Female
CTDSP1	-3.50918	0.000490944	0.00214284	Female
AFF2	-3.50879	0.000491646	0.00214537	Female
GRID1	-3.50859	0.000491996	0.00214583	Female
TRIM69	-3.50816	0.000492781	0.00214872	Female
KIAA1967	-3.50697	0.000494932	0.00215567	Female
MEI1	-3.50698	0.000494916	0.00215567	Female
MRGPRF	-3.50633	0.000496099	0.00215889	Female
RNF148	-3.5062	0.000496334	0.00215937	Female
FBXL16	-3.50599	0.000496716	0.0021605	Female
ADSSL1	-3.5037	0.000500906	0.00217656	Female
HAPLN4	-3.50211	0.000503825	0.00218816	Female
ADAP2	-3.50183	0.000504347	0.00218988	Female
BEGAIN	-3.50118	0.000505537	0.00219361	Female
AQP11	-3.5008	0.000506248	0.00219534	Female
EMR4P	-3.5007	0.000506431	0.00219534	Female
FHL2	-3.50067	0.000506482	0.00219534	Female
CD207	-3.49921	0.000509201	0.00220603	Female
ACTG2	-3.49756	0.000512289	0.00221722	Female
P2RY13	-3.49748	0.000512427	0.00221727	Female
PCDHB17	-3.49633	0.00051459	0.00222497	Female
RAB27A	-3.49633	0.000514581	0.00222497	Female
ROBO3	-3.49593	0.000515338	0.00222766	Female
PCDHB11	-3.49348	0.000519974	0.00224659	Female
KANK3	-3.49336	0.000520202	0.00224702	Female
MVP	-3.49217	0.000522479	0.00225519	Female
FAM46B	-3.49182	0.000523144	0.0022573	Female
SERPINB6	-3.49177	0.000523226	0.0022573	Female
CNN1	-3.49137	0.000523993	0.00225949	Female
PSD3	-3.4914	0.000523942	0.00225949	Female
PLOD1	-3.49077	0.000525142	0.00226389	Female
MYST4	-3.48988	0.000526851	0.00227014	Female
TICAM1	-3.48931	0.000527951	0.00227376	Female
MMRN1	-3.48806	0.000530371	0.00228194	Female
HOXC9	-3.48791	0.000530664	0.00228264	Female
MCM5	-3.48774	0.000530987	0.00228346	Female
PITPNA	-3.48766	0.000531152	0.00228362	Female
GPR34	-3.48727	0.000531909	0.00228574	Female
GYS1	-3.48698	0.000532457	0.00228754	Female
IL4R	-3.48646	0.000533482	0.00228949	Female
TRNAU1AP	-3.48548	0.000535382	0.00229672	Female
PNMAL2	-3.48533	0.000535674	0.00229742	Female
SLC17A8	-3.48489	0.000536534	0.0023005	Female
GM2A	-3.4845	0.000537298	0.00230269	Female
TLN1	-3.48428	0.000537724	0.00230395	Female
DPP6	-3.48278	0.000540676	0.00231504	Female
TXN2	-3.48276	0.00054071	0.00231504	Female
CCDC85C	-3.48241	0.000541406	0.00231746	Female
GPR97	-3.48202	0.000542182	0.00232021	Female
HPGDS	-3.48065	0.000544893	0.00232968	Female
ERN2	-3.47885	0.000548469	0.00234288	Female
ITPRIPL2	-3.47881	0.000548551	0.00234288	Female
TPRG1L	-3.47891	0.000548362	0.00234288	Female
ARID3B	-3.47753	0.000551117	0.0023527	Female
RHOJ	-3.47714	0.000551892	0.00235485	Female
PLEC	-3.47705	0.000552083	0.00235501	Female
HLA-C	-3.47681	0.00055256	0.00235598	Female
MUL1	-3.47492	0.000556369	0.00236934	Female
LOC100233209	-3.47089	0.000564595	0.00240076	Female
CDC42EP1	-3.46831	0.000569899	0.00242166	Female
RNASE1	-3.46813	0.000570268	0.00242225	Female
SLC18A2	-3.46811	0.000570316	0.00242225	Female
SORBS3	-3.46774	0.000571095	0.00242379	Female
SUCNR1	-3.46718	0.000572245	0.00242809	Female
CCR10	-3.467	0.000572622	0.0024291	Female
SCG3	-3.46542	0.000575907	0.00244185	Female
PSMB6	-3.46433	0.000578202	0.00245099	Female
ARL4C	-3.46162	0.000583917	0.00247282	Female
AP3S2	-3.46154	0.000584083	0.00247292	Female
TUBB6	-3.45875	0.000590015	0.00249322	Female
AHCYL1	-3.45829	0.000590987	0.00249577	Female
ARHGAP25	-3.45826	0.000591071	0.00249577	Female
FCER1G	-3.4582	0.000591191	0.00249577	Female
KCNA3	-3.4584	0.000590772	0.00249577	Female
C22orf30	-3.45762	0.00059244	0.00249892	Female
CDA	-3.45768	0.000592298	0.00249892	Female
LPIN2	-3.45758	0.000592523	0.00249892	Female
DPYSL5	-3.45734	0.000593046	0.00249939	Female
B3GALT4	-3.45666	0.000594507	0.00250494	Female
C19orf54	-3.45655	0.000594728	0.00250497	Female
PIK3CG	-3.45624	0.000595402	0.0025063	Female
PTGER3	-3.4561	0.000595696	0.00250633	Female
FBXO15	-3.45576	0.000596447	0.00250849	Female
SLC4A4	-3.45567	0.000596639	0.00250849	Female
GPR109A	-3.45541	0.000597196	0.00250963	Female
PRIMA1	-3.45544	0.000597139	0.00250963	Female
C1RL	-3.45489	0.000598324	0.00251256	Female
C12orf26	-3.45338	0.000601598	0.00252388	Female
PIK3AP1	-3.45177	0.000605123	0.00253746	Female
GPR68	-3.45149	0.000605735	0.00253881	Female
ADAM6	-3.45073	0.000607383	0.00254389	Female
BTBD3	-3.45079	0.000607251	0.00254389	Female
POU2AF1	-3.44942	0.000610266	0.00255474	Female
CNTROB	-3.44904	0.00061111	0.00255766	Female
GPR114	-3.44885	0.000611532	0.00255821	Female
HCN4	-3.44506	0.00061996	0.00258975	Female
BDKRB2	-3.44453	0.000621157	0.00259383	Female
ARHGAP17	-3.44435	0.000621569	0.00259397	Female
NPR1	-3.44428	0.000621712	0.00259397	Female
ODF3B	-3.44431	0.00062165	0.00259397	Female
HRH2	-3.44388	0.000622626	0.00259717	Female
C20orf160	-3.44294	0.000624723	0.00260405	Female
BLVRA	-3.4415	0.000627988	0.00261393	Female
EHBP1L1	-3.44152	0.00062793	0.00261393	Female
FAM7A3	-3.44166	0.000627634	0.00261393	Female
TM4SF4	-3.44159	0.000627783	0.00261393	Female
C1R	-3.44053	0.000630186	0.00262121	Female
SP2	-3.44045	0.00063037	0.00262135	Female
PLEKHG3	-3.43953	0.000632459	0.00262727	Female
TP53INP1	-3.4395	0.000632544	0.00262727	Female
MFSD7	-3.43908	0.000633502	0.00263	Female
CNFN	-3.43815	0.00063563	0.00263821	Female
JPH4	-3.43784	0.000636322	0.00263931	Female
EFHD2	-3.43717	0.000637878	0.00264441	Female
LOC146336	-3.43592	0.000640753	0.00265507	Female
CNGA3	-3.4357	0.000641262	0.00265655	Female
CPXM2	-3.43535	0.000642057	0.00265921	Female
IGFBP6	-3.4352	0.000642409	0.00266004	Female
ERGIC1	-3.4351	0.000642657	0.00266039	Female
FOXP1	-3.43503	0.000642798	0.00266039	Female
SLCO2B1	-3.43462	0.000643763	0.00266376	Female
TNC	-3.42945	0.000655857	0.00270996	Female
MRC2	-3.42808	0.000659092	0.00271947	Female
C2orf40	-3.42787	0.000659579	0.00272084	Female
NCRNA00181	-3.42778	0.000659808	0.00272115	Female
APOBEC3G	-3.4276	0.000660237	0.0027217	Female
FXYD6	-3.42706	0.000661523	0.00272565	Female
TNIK	-3.42712	0.000661375	0.00272565	Female
CPT2	-3.42648	0.000662893	0.00273001	Female
BAG3	-3.42614	0.000663705	0.00273207	Female
GGT5	-3.42593	0.000664206	0.00273349	Female
NAT15	-3.42577	0.000664581	0.00273439	Female
CCDC8	-3.42519	0.000665964	0.00273876	Female
BMF	-3.42412	0.000668549	0.00274619	Female
VAPA	-3.42311	0.000670968	0.00275549	Female
GPR55	-3.42301	0.000671207	0.00275582	Female
ANKRD34A	-3.42138	0.000675151	0.00276947	Female
DNER	-3.42138	0.000675165	0.00276947	Female
KIAA0922	-3.42081	0.000676533	0.00277379	Female
EIF5A	-3.4206	0.000677058	0.00277529	Female
APOL3	-3.42036	0.000677625	0.00277631	Female
TMEM140	-3.42038	0.000677576	0.00277631	Female
GLIS3	-3.4201	0.000678252	0.00277823	Female
DOCK4	-3.41952	0.000679688	0.00278281	Female
CXorf21	-3.41909	0.000680735	0.00278644	Female
LYST	-3.4188	0.000681427	0.00278863	Female
FCER1A	-3.41779	0.000683898	0.00279482	Female
SMCHD1	-3.41709	0.000685641	0.00280063	Female
NPC1	-3.41682	0.000686281	0.0028026	Female
ADH1B	-3.4153	0.000690036	0.00281494	Female
GBP4	-3.41539	0.000689823	0.00281494	Female
LAMB2	-3.41527	0.000690107	0.00281494	Female
C1orf177	-3.41495	0.00069091	0.00281585	Female
RIMBP3C	-3.41494	0.000690939	0.00281585	Female
EP300	-3.41299	0.000695778	0.00283279	Female
DNAJB5	-3.41222	0.000697694	0.0028387	Female
SH3BP2	-3.41221	0.000697717	0.0028387	Female
WNT9A	-3.41191	0.000698467	0.00284043	Female
DZIP1L	-3.41176	0.00069885	0.00284133	Female
PPM1L	-3.41124	0.000700158	0.00284533	Female
KIAA1644	-3.41096	0.000700853	0.00284749	Female
DIRAS2	-3.41039	0.000702292	0.00285201	Female
KCNN1	-3.40783	0.000708758	0.00287294	Female
MAPK1IP1L	-3.40749	0.000709628	0.00287522	Female
TNFRSF13C	-3.40719	0.000710374	0.00287749	Female
HAND2	-3.40704	0.000710757	0.00287771	Female
BOC	-3.40519	0.000715491	0.00289353	Female
KIAA1632	-3.40468	0.00071679	0.00289744	Female
ITGB3	-3.40432	0.000717715	0.00289985	Female
CCDC107	-3.40213	0.000723359	0.00291726	Female
NOTCH2	-3.40102	0.000726237	0.00292771	Female
PCDHA10	-3.401	0.000726283	0.00292771	Female
PKNOX2	-3.40083	0.000726729	0.00292883	Female
LOC400043	-3.40056	0.000727416	0.00293092	Female
ETFA	-3.39926	0.000730813	0.00294258	Female
METRN	-3.39915	0.00073109	0.00294302	Female
LILRA4	-3.39887	0.000731838	0.00294468	Female
POLR2L	-3.39889	0.000731782	0.00294468	Female
CAPN9	-3.39865	0.000732412	0.00294618	Female
MFHAS1	-3.39858	0.000732597	0.00294618	Female
TOR1AIP2	-3.39822	0.000733523	0.00294874	Female
TTC22	-3.39772	0.000734836	0.00295335	Female
JMJD8	-3.39672	0.000737472	0.00296122	Female
ARHGEF17	-3.39621	0.000738817	0.00296594	Female
GPR77	-3.3953	0.000741203	0.00297416	Female
FBLN7	-3.39335	0.000746391	0.00299291	Female
CTSG	-3.39191	0.000750234	0.00300557	Female
SCN9A	-3.3914	0.000751603	0.00300899	Female
CCL19	-3.39048	0.000754073	0.0030175	Female
C17orf85	-3.39022	0.000754753	0.00301953	Female
FBLN5	-3.39001	0.000755337	0.00302117	Female
IRF7	-3.38975	0.000756035	0.00302328	Female
RTBDN	-3.38947	0.000756791	0.00302492	Female
LEPROTL1	-3.38862	0.000759076	0.00303197	Female
RHOBTB2	-3.38831	0.000759924	0.0030328	Female
STARD8	-3.38584	0.000766624	0.00305724	Female
GZMH	-3.38571	0.000766993	0.00305802	Female
GPT	-3.38455	0.000770158	0.00306854	Female
EIF2C1	-3.38421	0.000771083	0.00307153	Female
HSPB1	-3.38254	0.000775681	0.00308773	Female
CYS1	-3.38211	0.000776863	0.00309103	Female
STK10	-3.38158	0.000778327	0.00309615	Female
SPOCK2	-3.38132	0.000779053	0.00309834	Female
C9orf167	-3.38108	0.000779724	0.0031003	Female
GRIN3A	-3.37985	0.000783128	0.00311313	Female
C11orf41	-3.37972	0.00078351	0.00311323	Female
SCN1B	-3.3793	0.000784664	0.0031164	Female
KLK1	-3.37904	0.000785408	0.00311658	Female
C14orf4	-3.37831	0.000787444	0.0031232	Female
GJB2	-3.37621	0.000793336	0.00314372	Female
C10orf26	-3.37546	0.000795442	0.00315009	Female
PLCB2	-3.37522	0.000796129	0.00315193	Female
MTMR3	-3.37468	0.00079765	0.00315724	Female
MEIS1	-3.37438	0.000798504	0.0031599	Female
LOC728392	-3.37395	0.000799738	0.00316336	Female
WSB2	-3.37289	0.000802735	0.00317378	Female
CEND1	-3.37273	0.000803198	0.00317417	Female
SEC1	-3.37054	0.000809463	0.00319605	Female
DAG1	-3.37033	0.000810076	0.00319666	Female
ALDH16A1	-3.37013	0.000810635	0.00319779	Female
FAM70A	-3.36901	0.000813869	0.0032091	Female
ST3GAL4	-3.36868	0.000814829	0.00321071	Female
FAM108A1	-3.3682	0.000816197	0.00321538	Female
RABAC1	-3.36787	0.000817148	0.00321768	Female
LILRB3	-3.36661	0.000820809	0.00322992	Female
ASPA	-3.36652	0.000821076	0.00323024	Female
TXNIP	-3.36635	0.000821585	0.00323079	Female
CXCR6	-3.36582	0.000823109	0.00323606	Female
ZNF831	-3.36564	0.00082363	0.00323665	Female
CELA3B	-3.36514	0.000825108	0.00324028	Female
IQSEC3	-3.36516	0.000825038	0.00324028	Female
SGSM1	-3.3648	0.000826091	0.0032431	Female
XCL2	-3.36369	0.000829352	0.003254	Female
MFSD9	-3.36323	0.000830712	0.0032579	Female
LAP3	-3.36278	0.000832023	0.00326231	Female
SLIT2	-3.36244	0.000833038	0.00326556	Female
RSAD2	-3.36099	0.00083731	0.00328157	Female
MAX	-3.36069	0.000838213	0.00328438	Female
CD177	-3.36047	0.000838867	0.0032862	Female
FRMD4B	-3.36022	0.00083961	0.00328838	Female
FCN1	-3.3593	0.000842347	0.00329836	Female
RNF121	-3.35614	0.000851804	0.00333018	Female
P704P	-3.35585	0.00085266	0.00333278	Female
SLC9A3R1	-3.35086	0.000867819	0.00338447	Female
PLEKHM1	-3.35036	0.000869373	0.00338902	Female
TMEM11	-3.35026	0.000869655	0.00338937	Female
CLINT1	-3.34948	0.000872078	0.00339579	Female
AGRN	-3.34898	0.000873617	0.00340103	Female
TIGIT	-3.34766	0.000877669	0.00341604	Female
FBXL14	-3.34708	0.000879475	0.00342155	Female
MAPK3	-3.3454	0.000884702	0.00343888	Female
PLA2G3	-3.3419	0.000895667	0.00347759	Female
PWWP2B	-3.34128	0.000897624	0.00348441	Female
GRASP	-3.3409	0.000898838	0.00348786	Female
GPR18	-3.34017	0.000901141	0.00349497	Female
AGPAT4	-3.33923	0.000904145	0.00350506	Female
MYH11	-3.33913	0.000904449	0.00350546	Female
PTCRA	-3.33714	0.000910825	0.00352784	Female
DLG4	-3.33672	0.000912173	0.00353071	Female
KIF1A	-3.33675	0.000912061	0.00353071	Female
DMXL2	-3.33454	0.00091918	0.00355556	Female
SFRP1	-3.33453	0.000919202	0.00355556	Female
RIMS3	-3.33262	0.000925413	0.00357721	Female
INCA1	-3.33189	0.000927781	0.00358479	Female
C17orf101	-3.33179	0.000928103	0.00358524	Female
653553	-3.33113	0.000930256	0.00359197	Female
TREX1	-3.32975	0.000934775	0.00360703	Female
TGFB1I1	-3.32752	0.000942124	0.00363219	Female
TSPAN11	-3.32654	0.000945364	0.00364307	Female
FXYD3	-3.32646	0.000945619	0.00364326	Female
CCR1	-3.32638	0.000945889	0.00364349	Female
MFGE8	-3.32573	0.00094807	0.00365109	Female
CD244	-3.32343	0.000955743	0.00367794	Female
UNC5A	-3.32339	0.000955882	0.00367794	Female
RASD2	-3.322	0.000960542	0.00369424	Female
ADCY6	-3.32185	0.000961038	0.00369534	Female
KIAA0427	-3.3217	0.000961532	0.00369643	Female
ZNF488	-3.32081	0.000964539	0.00370717	Female
RND1	-3.32018	0.000966665	0.00371453	Female
MEP1B	-3.31823	0.000973292	0.00373918	Female
INF2	-3.31785	0.000974585	0.00374332	Female
GCNT2	-3.31743	0.000976017	0.00374718	Female
NCF4	-3.31687	0.000977947	0.00375377	Female
LILRB4	-3.31659	0.000978902	0.00375578	Female
PLBD2	-3.31551	0.000982601	0.00376915	Female
TLR1	-3.31335	0.000990065	0.00379528	Female
DLX1	-3.31294	0.000991465	0.00379982	Female
GSTM4	-3.31119	0.000997553	0.00382232	Female
GALNTL2	-3.31017	0.00100114	0.00383521	Female
PER1	-3.30982	0.00100235	0.00383901	Female
C6orf204	-3.30967	0.00100289	0.00384026	Female
LOC643008	-3.30925	0.00100434	0.00384494	Female
SOX10	-3.30835	0.00100751	0.00385458	Female
MSMP	-3.30824	0.0010079	0.0038552	Female
PLEKHO2	-3.30806	0.00100854	0.00385681	Female
SERPING1	-3.30752	0.00101045	0.00386243	Female
CD84	-3.30729	0.00101126	0.0038647	Female
CCL8	-3.30716	0.00101171	0.00386472	Female
ITGA10	-3.30673	0.00101324	0.00386889	Female
CD160	-3.30624	0.00101495	0.00387286	Female
MARK2	-3.30595	0.00101598	0.00387596	Female
ARHGEF18	-3.30437	0.0010216	0.00389402	Female
DPYSL4	-3.30427	0.00102195	0.00389448	Female
GRIA3	-3.30136	0.00103239	0.00393	Female
UNC5C	-3.30136	0.00103238	0.00393	Female
C4orf19	-3.30011	0.0010369	0.0039446	Female
ADAM10	-3.29844	0.00104295	0.00396257	Female
POTEE	-3.29843	0.00104298	0.00396257	Female
RFPL1S	-3.29812	0.0010441	0.00396594	Female
ACER3	-3.29725	0.00104727	0.00397588	Female
CAMK2D	-3.29722	0.0010474	0.00397588	Female
NBLA00301	-3.29708	0.00104791	0.00397698	Female
DEPDC5	-3.29575	0.00105276	0.00399107	Female
FLT3LG	-3.29527	0.00105453	0.00399604	Female
CDS1	-3.29428	0.00105815	0.004008	Female
ELOVL3	-3.2935	0.00106102	0.00401716	Female
FASLG	-3.29326	0.00106192	0.00401795	Female
MEF2A	-3.29336	0.00106156	0.00401795	Female
PTPRN	-3.2933	0.00106179	0.00401795	Female
CPT1A	-3.29305	0.00106272	0.0040201	Female
LILRA3	-3.29264	0.00106422	0.00402402	Female
KLHL25	-3.29143	0.00106873	0.00403497	Female
SNCG	-3.29112	0.00106986	0.00403839	Female
FAM101B	-3.29039	0.00107259	0.00404607	Female
KLRD1	-3.29021	0.00107324	0.00404683	Female
LPXN	-3.29021	0.00107325	0.00404683	Female
APLP2	-3.29013	0.00107356	0.00404713	Female
FUCA1	-3.28896	0.00107792	0.00406091	Female
A2M	-3.28887	0.00107825	0.00406131	Female
DNAJC5B	-3.28807	0.00108126	0.00407129	Female
FAM69C	-3.28804	0.00108137	0.00407129	Female
TBXA2R	-3.2876	0.00108304	0.00407585	Female
INSC	-3.28669	0.00108644	0.00408371	Female
MTMR14	-3.28629	0.00108796	0.00408821	Female
SLC22A17	-3.28594	0.00108928	0.00409229	Female
KCTD15	-3.28537	0.00109144	0.00409953	Female
ATCAY	-3.2841	0.00109628	0.00411591	Female
GAPDH	-3.28392	0.00109696	0.00411758	Female
LOC728264	-3.28329	0.00109934	0.00412566	Female
CYGB	-3.28296	0.00110063	0.00412783	Female
EPHA10	-3.28193	0.00110456	0.00414161	Female
SLC25A1	-3.28187	0.00110478	0.00414161	Female
ROGDI	-3.28169	0.00110547	0.00414334	Female
TNFAIP2	-3.28032	0.00111074	0.00415684	Female
HEG1	-3.28	0.00111197	0.00415966	Female
LRPAP1	-3.28005	0.00111178	0.00415966	Female
C10orf128	-3.27922	0.00111498	0.00416738	Female
C6orf142	-3.27922	0.00111498	0.00416738	Female
SFMBT2	-3.27859	0.00111745	0.0041748	Female
TXNDC17	-3.27724	0.00112265	0.00419337	Female
SCN7A	-3.27666	0.00112494	0.00419921	Female
PLVAP	-3.27659	0.00112522	0.00419936	Female
LOC153328	-3.2758	0.00112828	0.00420898	Female
TRIM36	-3.27562	0.00112899	0.00421074	Female
N4BP3	-3.27375	0.00113631	0.00423533	Female
LCP2	-3.27322	0.00113839	0.00424218	Female
GPR110	-3.27242	0.00114157	0.00425221	Female
CPEB1	-3.27111	0.00114675	0.00427062	Female
STAC	-3.27065	0.00114857	0.00427647	Female
HCLS1	-3.26999	0.00115122	0.00428544	Female
TACR1	-3.26963	0.00115263	0.00428978	Female
CECR1	-3.26946	0.00115332	0.00429143	Female
MS4A6A	-3.26851	0.00115709	0.00430272	Female
PCDHA1	-3.26729	0.00116198	0.00432	Female
HDHD1A	-3.26539	0.00116966	0.00434484	Female
CD6	-3.26459	0.0011729	0.00435594	Female
CDHR4	-3.26428	0.00117414	0.00435963	Female
EXTL3	-3.26378	0.00117617	0.00436349	Female
NFE2L1	-3.26367	0.00117662	0.00436421	Female
KIF19	-3.26332	0.00117806	0.00436688	Female
NBPF7	-3.26332	0.00117804	0.00436688	Female
BRI3BP	-3.26293	0.00117964	0.00437173	Female
KDM4B	-3.26186	0.00118402	0.00438608	Female
TTLL7	-3.2594	0.00119409	0.00441965	Female
APOBEC3A	-3.25907	0.00119547	0.00442289	Female
ARHGEF16	-3.25911	0.00119527	0.00442289	Female
NFIC	-3.25885	0.00119634	0.00442511	Female
AHNAK2	-3.25845	0.00119801	0.00442724	Female
TRAPPC4	-3.25841	0.00119816	0.00442724	Female
ZNF543	-3.25809	0.00119952	0.00442959	Female
PIWIL1	-3.25784	0.00120054	0.00443228	Female
SH3BP5L	-3.25705	0.00120381	0.00444267	Female
SIDT1	-3.25694	0.00120427	0.00444325	Female
PHLPP2	-3.25613	0.00120765	0.0044529	Female
TNFRSF10D	-3.25453	0.00121433	0.00447374	Female
ARRB1	-3.25278	0.00122164	0.00449794	Female
TBX21	-3.24984	0.0012341	0.00453894	Female
LOC400759	-3.24961	0.00123507	0.00454154	Female
PLEKHM2	-3.24919	0.00123684	0.00454616	Female
ARID1A	-3.24816	0.00124124	0.00455948	Female
RBPMS2	-3.24798	0.001242	0.00456131	Female
SDPR	-3.24783	0.00124263	0.00456265	Female
KIF17	-3.24769	0.00124324	0.00456395	Female
RNMTL1	-3.24736	0.00124467	0.0045659	Female
TEK	-3.24593	0.00125077	0.00458677	Female
C8G	-3.24521	0.00125387	0.00459717	Female
PLEK	-3.24468	0.00125619	0.00460471	Female
HCN2	-3.24456	0.00125669	0.0046056	Female
PLAT	-3.24267	0.00126487	0.00463265	Female
RASGRP2	-3.24192	0.00126813	0.00464265	Female
C3orf57	-3.24168	0.00126918	0.00464552	Female
CLEC4G	-3.24149	0.00127003	0.00464766	Female
PNMA2	-3.24085	0.00127282	0.00465592	Female
CLIP3	-3.24061	0.00127388	0.00465883	Female
MTSS1L	-3.24038	0.00127486	0.00465951	Female
SPEG	-3.23941	0.00127911	0.00467111	Female
KLRK1	-3.2384	0.00128355	0.00468538	Female
FGD4	-3.23734	0.00128823	0.00470051	Female
SIGLEC6	-3.23721	0.00128883	0.00470172	Female
GPS2	-3.2347	0.00129997	0.00473251	Female
CSF3R	-3.23382	0.00130386	0.00474204	Female
ASAM	-3.23358	0.00130497	0.00474437	Female
HSD3B2	-3.23351	0.00130528	0.00474437	Female
SEC31A	-3.23348	0.0013054	0.00474437	Female
PHLDB1	-3.23207	0.00131173	0.00476443	Female
CCNJL	-3.23142	0.00131463	0.00477297	Female
CRIPAK	-3.23123	0.00131551	0.00477417	Female
LACTB	-3.23029	0.00131972	0.00478748	Female
RGS2	-3.2302	0.00132014	0.00478799	Female
MARCO	-3.22916	0.00132486	0.00480215	Female
ADRB2	-3.22648	0.00133706	0.00483902	Female
BTN3A2	-3.22644	0.00133725	0.00483902	Female
TLR6	-3.22599	0.00133933	0.00484554	Female
TRPS1	-3.2246	0.00134568	0.0048655	Female
FZD8	-3.22419	0.00134756	0.0048713	Female
TPBG	-3.22316	0.00135232	0.00488448	Female
PTPN9	-3.22261	0.00135485	0.00489161	Female
CNTN2	-3.22233	0.00135618	0.0048954	Female
GNG7	-3.22161	0.00135953	0.00490446	Female
LYZ	-3.22032	0.00136553	0.00492306	Female
SMAD3	-3.21927	0.00137041	0.00493859	Female
MYO9B	-3.21815	0.00137567	0.00495654	Female
PDE1B	-3.2178	0.00137733	0.00496047	Female
RIC8B	-3.21754	0.00137852	0.00496313	Female
WWTR1	-3.21752	0.00137863	0.00496313	Female
WDR6	-3.21639	0.00138396	0.00498027	Female
LMBR1L	-3.21614	0.00138512	0.00498343	Female
ZSCAN12P1	-3.21527	0.00138927	0.0049963	Female
HPGD	-3.21441	0.00139332	0.00500779	Female
GCNT4	-3.21409	0.00139485	0.00501226	Female
LONRF3	-3.21371	0.00139666	0.00501771	Female
MAPK10	-3.21334	0.00139845	0.0050219	Female
PCDH7	-3.21304	0.00139984	0.00502503	Female
MYLK	-3.2126	0.00140197	0.0050306	Female
SLC9A2	-3.21232	0.00140328	0.00503323	Female
FKBP2	-3.21223	0.00140372	0.00503378	Female
TMEM149	-3.21103	0.00140947	0.00505338	Female
ITM2A	-3.21074	0.00141088	0.00505733	Female
APOBEC3H	-3.21008	0.00141406	0.00506567	Female
NFAM1	-3.20878	0.00142033	0.00508502	Female
DAAM2	-3.20871	0.00142065	0.0050851	Female
GPBAR1	-3.20856	0.00142139	0.00508672	Female
ABCD2	-3.20759	0.00142607	0.00510003	Female
PRDM16	-3.2075	0.00142654	0.00510003	Female
PPM1M	-3.20658	0.00143101	0.00511489	Female
MITF	-3.20612	0.00143326	0.00512187	Female
DARC	-3.206	0.00143385	0.00512295	Female
OLFML1	-3.20589	0.00143436	0.00512372	Female
KCNK10	-3.20581	0.00143478	0.00512416	Female
PDZRN4	-3.20526	0.00143745	0.00513265	Female
DES	-3.20517	0.0014379	0.00513323	Female
TPI1	-3.20475	0.00143992	0.00513835	Female
PI16	-3.20311	0.00144798	0.0051629	Female
FKRP	-3.20259	0.00145057	0.00516897	Female
ACTN1	-3.20229	0.00145203	0.0051731	Female
RPA1	-3.20184	0.00145428	0.00517902	Female
PAFAH2	-3.20156	0.00145568	0.00518294	Female
BAZ2A	-3.20089	0.00145895	0.00519248	Female
TXNL4A	-3.20044	0.0014612	0.00519839	Female
VWA3B	-3.1999	0.00146387	0.00520577	Female
RARRES1	-3.19912	0.00146778	0.0052186	Female
HLA-E	-3.19897	0.00146853	0.00521915	Female
STK17B	-3.19898	0.00146847	0.00521915	Female
FILIP1	-3.19818	0.00147244	0.00522988	Female
IER3IP1	-3.19725	0.0014771	0.00524412	Female
ZFR2	-3.19708	0.00147795	0.00524412	Female
DKFZp779M0652	-3.19576	0.00148462	0.00526458	Female
PRDM1	-3.1952	0.00148742	0.00527345	Female
BTNL8	-3.19236	0.00150183	0.00532129	Female
SEC24D	-3.19204	0.00150346	0.00532601	Female
FAM177B	-3.19068	0.00151041	0.00534846	Female
FPR1	-3.18976	0.00151514	0.00536264	Female
PARVG	-3.18844	0.00152193	0.00538271	Female
WRAP53	-3.18828	0.00152274	0.0053845	Female
SLC18A3	-3.1882	0.00152315	0.00538487	Female
LGALS2	-3.18795	0.00152443	0.00538739	Female
B3GAT1	-3.18659	0.00153147	0.00541097	Female
ACTA2	-3.1854	0.00153767	0.00543018	Female
LEPREL2	-3.18549	0.00153722	0.00543018	Female
RABGGTA	-3.18537	0.00153783	0.00543018	Female
LHFPL4	-3.18526	0.00153838	0.00543063	Female
ABCA12	-3.18426	0.00154363	0.00544405	Female
PLIN4	-3.18319	0.0015492	0.00546042	Female
C19orf51	-3.18313	0.00154954	0.0054605	Female
IFFO1	-3.18198	0.00155558	0.00547958	Female
BCL3	-3.18161	0.0015575	0.00548413	Female
MDM2	-3.18061	0.00156278	0.0054983	Female
BCKDHA	-3.18015	0.0015652	0.00550572	Female
ZNF683	-3.17931	0.00156968	0.00552037	Female
TFF2	-3.17775	0.00157799	0.00554402	Female
SLC43A3	-3.17764	0.00157855	0.00554487	Female
SLC25A37	-3.17714	0.00158123	0.00555206	Female
ADH1A	-3.17494	0.00159301	0.00559117	Female
SRGN	-3.17479	0.00159385	0.00559301	Female
MAP3K5	-3.17382	0.00159905	0.005609	Female
APOE	-3.17293	0.00160384	0.00562018	Female
ANK2	-3.17287	0.0016042	0.0056203	Female
TOLLIP	-3.17178	0.0016101	0.00563988	Female
MARVELD3	-3.17129	0.00161276	0.00564579	Female
GREM2	-3.17036	0.00161782	0.00566238	Female
C1orf228	-3.1701	0.00161924	0.00566621	Female
AK7	-3.16927	0.0016238	0.00567876	Female
ARL6IP5	-3.16861	0.00162742	0.00568801	Female
POM121L8P	-3.16839	0.00162859	0.00569095	Female
CD3G	-3.16752	0.00163336	0.00570649	Female
REP15	-3.16731	0.00163453	0.00570945	Female
AVPR1B	-3.16678	0.00163746	0.0057174	Female
TLL1	-3.16624	0.00164044	0.0057255	Female
AQP3	-3.16604	0.00164153	0.00572666	Female
C1orf144	-3.16594	0.00164208	0.00572666	Female
GRIK1	-3.16607	0.00164138	0.00572666	Female
RAB42	-3.16599	0.00164181	0.00572666	Female
PCDHB4	-3.16453	0.00164992	0.00575057	Female
ADAM33	-3.16441	0.00165061	0.00575185	Female
TMIGD2	-3.16401	0.00165278	0.00575826	Female
HSPB8	-3.16255	0.00166096	0.00578561	Female
FAM43B	-3.1613	0.00166797	0.00580398	Female
MBNL3	-3.16125	0.00166822	0.00580398	Female
SYT13	-3.15997	0.00167541	0.00582667	Female
HBB	-3.15856	0.00168338	0.00584974	Female
TM6SF2	-3.15576	0.00169932	0.00590127	Female
CKAP4	-3.15537	0.00170155	0.00590701	Female
SLC13A1	-3.15513	0.00170289	0.00591048	Female
ARHGAP1	-3.15398	0.00170947	0.0059298	Female
ZBTB4	-3.15286	0.00171593	0.00594869	Female
HLA-DRB6	-3.15161	0.00172317	0.00597023	Female
EFEMP1	-3.15133	0.00172477	0.00597458	Female
NEFM	-3.14988	0.00173317	0.00600131	Female
ZDHHC7	-3.14888	0.00173902	0.00601682	Female
CD79A	-3.1477	0.00174591	0.00603825	Female
CHST12	-3.1476	0.00174649	0.00603905	Female
ZNF236	-3.14667	0.00175192	0.00605665	Female
DIRC3	-3.14658	0.00175244	0.00605724	Female
KCNJ5	-3.14548	0.00175893	0.00607727	Female
MST1R	-3.14473	0.00176338	0.00609025	Female
ATN1	-3.14263	0.00177577	0.00612333	Female
TUBA1B	-3.14078	0.0017868	0.00615536	Female
ABCC8	-3.14055	0.00178822	0.00615781	Female
CCDC80	-3.13966	0.00179354	0.0061737	Female
COX8A	-3.13698	0.00180971	0.00622692	Female
PODN	-3.13608	0.00181514	0.00624438	Female
GPR126	-3.136	0.00181561	0.00624476	Female
MYOT	-3.13394	0.00182817	0.00628303	Female
CTNNA1	-3.13265	0.00183604	0.00630269	Female
[truncated: 5,966 more rows]

## Sheet: DLBC
gene	stat	p	fdr	direction
KDM5C	-7.00292	9.02079e-09	7.28401e-05	Female
USP6	-6.88546	1.35363e-08	7.28401e-05	Female
XIST	-6.10305	2.02867e-07	0.000582575	Female
FCHSD2	-5.94639	3.48415e-07	0.000875481	Female
ZSCAN12P1	-5.53997	1.40822e-06	0.00209697	Female
USP9X	-5.49377	1.64917e-06	0.00221011	Female
ZNF782	-5.45456	1.88551e-06	0.00222956	Female
C10orf18	-5.40613	2.22416e-06	0.00223551	Female
MED14	-5.40765	2.21269e-06	0.00223551	Female
TSPYL4	-5.40902	2.20237e-06	0.00223551	Female
DDX3X	-5.32682	2.91352e-06	0.00266216	Female
SMC1A	-5.33468	2.8367e-06	0.00266216	Female
KLF10	-5.29696	3.22465e-06	0.00266594	Female
ZFX	-5.29608	3.23425e-06	0.00266594	Female
HGSNAT	-5.21443	4.26607e-06	0.00306274	Female
C14orf43	-5.17285	4.91058e-06	0.00308476	Female
ZC3H14	-5.19333	4.58199e-06	0.00308476	Female
BLZF1	-5.12909	5.69271e-06	0.00346772	Female
CHM	-5.05669	7.26562e-06	0.00351932	Female
KDM6A	-5.10109	6.25652e-06	0.00351932	Female
KIAA0355	-5.06124	7.15539e-06	0.00351932	Female
NCOA3	-5.07337	6.86903e-06	0.00351932	Female
RAB23	-5.11001	6.07132e-06	0.00351932	Female
UBFD1	-5.08459	6.61441e-06	0.00351932	Female
VCL	-5.05314	7.35307e-06	0.00351932	Female
BPTF	-5.02824	7.99497e-06	0.00367035	Female
FOXJ3	-5.01774	8.28221e-06	0.00367035	Female
OMG	-5.02629	8.04761e-06	0.00367035	Female
SMEK1	-5.00716	8.58155e-06	0.00367035	Female
ZNF280C	-4.96713	9.81453e-06	0.00411024	Female
MED23	-4.95112	1.03553e-05	0.00424823	Female
FILIP1	-4.93105	1.10747e-05	0.00434705	Female
GATAD2B	-4.92649	1.1245e-05	0.00434705	Female
RBM16	-4.91453	1.17037e-05	0.00435681	Female
CBL	-4.87976	1.31446e-05	0.00447852	Female
PHLPP2	-4.88631	1.28603e-05	0.00447852	Female
POFUT1	-4.88224	1.30362e-05	0.00447852	Female
FAM106C	-4.85649	1.42052e-05	0.00464218	Female
PDXDC1	-4.84932	1.45487e-05	0.00464218	Female
ALG13	-4.82475	1.57883e-05	0.00467342	Female
ATXN2	-4.81154	1.64979e-05	0.00467342	Female
FBXW11	-4.83456	1.52813e-05	0.00467342	Female
RNF40	-4.82032	1.60229e-05	0.00467342	Female
SFRS15	-4.81138	1.65064e-05	0.00467342	Female
TBCEL	-4.81302	1.64166e-05	0.00467342	Female
WIZ	-4.82014	1.60326e-05	0.00467342	Female
FAM149B1	-4.79827	1.72416e-05	0.00474783	Female
CASC3	-4.78596	1.79611e-05	0.00487911	Female
DCAKD	-4.77833	1.84213e-05	0.00493472	Female
INE1	-4.76863	1.90238e-05	0.00493472	Female
POGZ	-4.76667	1.91478e-05	0.00493472	Female
SPIN4	-4.77441	1.86624e-05	0.00493472	Female
BRPF3	-4.72582	2.19222e-05	0.00505132	Female
PCYOX1	-4.7232	2.2113e-05	0.00505132	Female
PDE3A	-4.73705	2.11229e-05	0.00505132	Female
SLC35D1	-4.75175	2.01187e-05	0.00505132	Female
SLC35F5	-4.7395	2.09516e-05	0.00505132	Female
TECTA	-4.73192	2.14846e-05	0.00505132	Female
DAG1	-4.71312	2.2863e-05	0.00516396	Female
ZNF608	-4.69454	2.43108e-05	0.00542995	Female
KLHL20	-4.68339	2.5222e-05	0.005511	Female
TMEM64	-4.68491	2.50957e-05	0.005511	Female
AASDHPPT	-4.66533	2.67703e-05	0.00578642	Female
QSER1	-4.65735	2.74833e-05	0.00586895	Female
SPEN	-4.65457	2.77361e-05	0.00586895	Female
FAM71F2	-4.64037	2.90641e-05	0.00602315	Female
TAF4	-4.62982	3.00912e-05	0.00617237	Female
APPBP2	-4.62058	3.10186e-05	0.00622447	Female
C1orf9	-4.62261	3.08132e-05	0.00622447	Female
RERE	-4.61757	3.13277e-05	0.00622447	Female
PRRC1	-4.60166	3.30084e-05	0.00642181	Female
FAM126A	-4.58508	3.48541e-05	0.00660978	Female
ZNF251	-4.58576	3.47761e-05	0.00660978	Female
PCDHGB7	-4.5776	3.57201e-05	0.00664857	Female
LSM14A	-4.56717	3.69624e-05	0.00672985	Female
STAG2	-4.56619	3.70808e-05	0.00672985	Female
UPRT	-4.56553	3.71612e-05	0.00672985	Female
RRN3	-4.53987	4.04168e-05	0.007126	Female
ZNF131	-4.54497	3.97479e-05	0.007126	Female
ANKIB1	-4.53421	4.11714e-05	0.00713473	Female
SIN3B	-4.52016	4.31062e-05	0.00740617	Female
BTBD12	-4.5057	4.51902e-05	0.00766341	Female
MBLAC2	-4.49695	4.64975e-05	0.00772474	Female
DDX42	-4.48385	4.85262e-05	0.00774661	Female
FAM168B	-4.48929	4.76728e-05	0.00774661	Female
POGK	-4.48791	4.78887e-05	0.00774661	Female
RBM12B	-4.47742	4.95531e-05	0.00774661	Female
SLC35E1	-4.47644	4.97121e-05	0.00774661	Female
UBE4B	-4.47693	4.96321e-05	0.00774661	Female
ZNF704	-4.47809	4.94445e-05	0.00774661	Female
CAPN7	-4.461	5.22738e-05	0.00778376	Female
MEN1	-4.46836	5.10367e-05	0.00778376	Female
UBIAD1	-4.4641	5.17481e-05	0.00778376	Female
USP45	-4.46746	5.11868e-05	0.00778376	Female
AEBP2	-4.43721	5.64751e-05	0.00784527	Female
ANKRD13C	-4.43624	5.66527e-05	0.00784527	Female
C5orf24	-4.4282	5.81507e-05	0.00784527	Female
CDK17	-4.43417	5.70341e-05	0.00784527	Female
CREBBP	-4.43773	5.63796e-05	0.00784527	Female
LOC100129726	-4.45397	5.34825e-05	0.00784527	Female
RAD52	-4.4427	5.54773e-05	0.00784527	Female
RBM14	-4.4299	5.78316e-05	0.00784527	Female
RNF2	-4.4359	5.67148e-05	0.00784527	Female
TBC1D5	-4.44275	5.5467e-05	0.00784527	Female
TTC3	-4.45159	5.38966e-05	0.00784527	Female
RBBP5	-4.42126	5.94757e-05	0.00797054	Female
COG1	-4.41474	6.07457e-05	0.00803362	Female
FAM13B	-4.40769	6.21497e-05	0.00816558	Female
ZDHHC23	-4.40414	6.28693e-05	0.00820649	Female
GOLGA2	-4.39976	6.37669e-05	0.00826995	Female
MFN1	-4.39628	6.44895e-05	0.00830227	Female
GNPDA2	-4.3925	6.52835e-05	0.00830588	Female
FAM193A	-4.38457	6.69787e-05	0.00841503	Female
KRIT1	-4.38591	6.66889e-05	0.00841503	Female
ARHGEF9	-4.37463	6.91679e-05	0.00849775	Female
NCRNA00183	-4.37391	6.9328e-05	0.00849775	Female
PHF20	-4.37422	6.9259e-05	0.00849775	Female
FGD1	-4.36655	7.09964e-05	0.00864951	Female
GNA11	-4.36081	7.23243e-05	0.0086754	Female
SCAI	-4.36005	7.25036e-05	0.0086754	Female
CHIC1	-4.34689	7.5647e-05	0.00894503	Female
BRMS1L	-4.33886	7.76329e-05	0.00902067	Female
CCNK	-4.34181	7.6897e-05	0.00902067	Female
SIK2	-4.33929	7.75241e-05	0.00902067	Female
ADNP	-4.31658	8.3407e-05	0.0091534	Female
ARHGEF7	-4.32506	8.11615e-05	0.0091534	Female
C2orf69	-4.31758	8.31378e-05	0.0091534	Female
MTOR	-4.31788	8.30583e-05	0.0091534	Female
R3HDM2	-4.31518	8.3784e-05	0.0091534	Female
SCMH1	-4.32866	8.02265e-05	0.0091534	Female
ZBTB43	-4.3152	8.37787e-05	0.0091534	Female
C12orf51	-4.30814	8.57025e-05	0.00926232	Female
PCDHGA9	-4.29897	8.82662e-05	0.00940349	Female
STK4	-4.2967	8.89132e-05	0.00940349	Female
ZFP3	-4.29518	8.93477e-05	0.00940349	Female
ARHGEF12	-4.28713	9.16865e-05	0.00950042	Female
ENTPD5	-4.28738	9.1614e-05	0.00950042	Female
MAP4K3	-4.2879	9.14607e-05	0.00950042	Female
EIF4G3	-4.27983	9.3861e-05	0.00967586	Female
CDK13	-4.27575	9.50956e-05	0.00970361	Female
SEC23A	-4.27651	9.48646e-05	0.00970361	Female
ALMS1	-4.2652	9.8368e-05	0.00988894	Female
DYRK1A	-4.26358	9.88796e-05	0.00988894	Female
RALGAPB	-4.26421	9.8679e-05	0.00988894	Female
FBXW8	-4.25387	0.000102001	0.0100021	Female
TEK	-4.25177	0.00010269	0.0100208	Female
ETS1	-4.24859	0.000103742	0.0100279	Female
SLAIN2	-4.24853	0.000103761	0.0100279	Female
EMX2OS	-4.23783	0.000107373	0.0100392	Female
PCDHGA2	-4.23813	0.000107271	0.0100392	Female
RACGAP1P	-4.24067	0.000106403	0.0100392	Female
UBAP2	-4.2418	0.000106018	0.0100392	Female
UBE2O	-4.24396	0.000105288	0.0100392	Female
PPIP5K2	-4.23258	0.000109191	0.0100686	Female
RANBP6	-4.23285	0.000109099	0.0100686	Female
ZNF594	-4.23379	0.00010877	0.0100686	Female
C1orf107	-4.22714	0.000111107	0.0100876	Female
PPM1D	-4.22843	0.000110647	0.0100876	Female
ASH1L	-4.22045	0.000113506	0.0101026	Female
C4orf42	-4.22231	0.000112834	0.0101026	Female
C5orf42	-4.2193	0.000113922	0.0101026	Female
CA5BP	-4.21337	0.000116098	0.0101026	Female
GABPA	-4.21609	0.000115095	0.0101026	Female
INTS2	-4.218	0.000114396	0.0101026	Female
JRKL	-4.20849	0.000117922	0.0101026	Female
PPFIBP1	-4.21058	0.000117138	0.0101026	Female
SIPA1L3	-4.22293	0.000112611	0.0101026	Female
SSH2	-4.21209	0.000116575	0.0101026	Female
GFPT1	-4.19114	0.000124626	0.0103537	Female
MYCBP2	-4.19311	0.000123845	0.0103537	Female
NCOA7	-4.19831	0.00012181	0.0103537	Female
PCDHGA11	-4.19021	0.000124994	0.0103537	Female
RNF169	-4.18966	0.000125213	0.0103537	Female
WHSC1	-4.19598	0.000122717	0.0103537	Female
KDM6B	-4.18275	0.000127998	0.0104171	Female
ZNF318	-4.18063	0.000128865	0.0104454	Female
KCNV2	-4.16778	0.00013424	0.0108103	Female
DIDO1	-4.16602	0.000134994	0.0108113	Female
DNAJC16	-4.16423	0.000135762	0.0108297	Female
TRIM68	-4.1614	0.000136988	0.0108843	Female
OFD1	-4.15667	0.000139062	0.0110056	Female
BRD4	-4.13943	0.000146881	0.0112694	Female
C1orf25	-4.13989	0.000146663	0.0112694	Female
FAM20B	-4.14652	0.000143613	0.0112694	Female
PIK3C2A	-4.14547	0.000144095	0.0112694	Female
TAF1	-4.14262	0.000145402	0.0112694	Female
CHD6	-4.13341	0.000149706	0.0113992	Female
EP300	-4.134	0.000149431	0.0113992	Female
RBM12	-4.13125	0.000150736	0.0114343	Female
HECTD1	-4.12591	0.00015331	0.0115526	Female
RPGRIP1L	-4.123	0.000154727	0.0115626	Female
STAU1	-4.12341	0.000154528	0.0115626	Female
C9orf45	-4.11791	0.000157237	0.0117066	Female
RBM4B	-4.11321	0.000159595	0.0117182	Female
TSSK4	-4.11445	0.00015897	0.0117182	Female
ZNF117	-4.11295	0.000159725	0.0117182	Female
DCAF17	-4.10849	0.000161995	0.0118416	Female
TTC17	-4.10237	0.000165157	0.0119424	Female
ATM	-4.09221	0.000170543	0.0121002	Female
KLHL38	-4.09566	0.000168695	0.0121002	Female
PCF11	-4.09108	0.000171152	0.0121002	Female
SEMA3G	-4.09034	0.000171553	0.0121002	Female
ZNF827	-4.09351	0.000169843	0.0121002	Female
ANO1	-4.08683	0.000173467	0.0121359	Female
HERC3	-4.08657	0.000173605	0.0121359	Female
NFXL1	-4.08609	0.00017387	0.0121359	Female
TCEANC	-4.08403	0.000175003	0.0121363	Female
STRBP	-4.08054	0.00017694	0.0122229	Female
CNST	-4.07852	0.000178072	0.0122589	Female
SUZ12	-4.07139	0.00018212	0.0124523	Female
RALGPS2	-4.06781	0.000184184	0.0125507	Female
KIAA2026	-4.06488	0.000185893	0.0126244	Female
ARID1B	-4.05837	0.000189741	0.0126896	Female
CCDC144C	-4.05827	0.000189801	0.0126896	Female
SETD5	-4.06171	0.000187757	0.0126896	Female
SOS2	-4.05792	0.000190009	0.0126896	Female
TRRAP	-4.06072	0.000188343	0.0126896	Female
ANGEL2	-4.04669	0.000196838	0.0127542	Female
CHORDC1	-4.0365	0.000203242	0.0127542	Female
FTO	-4.03916	0.000201556	0.0127542	Female
GPR34	-4.03824	0.000202136	0.0127542	Female
IFT80	-4.04808	0.000195979	0.0127542	Female
NCOA5	-4.03716	0.000202822	0.0127542	Female
NPEPPS	-4.0495	0.000195106	0.0127542	Female
SNX25	-4.03584	0.000203665	0.0127542	Female
TMEM123	-4.04212	0.000199685	0.0127542	Female
TRAF6	-4.04807	0.00019599	0.0127542	Female
TULP3	-4.04506	0.000197853	0.0127542	Female
USP6NL	-4.04589	0.000197334	0.0127542	Female
WNK3	-4.03912	0.000201576	0.0127542	Female
MED17	-4.03304	0.000205461	0.0128267	Female
FAM179B	-4.02995	0.000207465	0.0128718	Female
REV3L	-4.03004	0.000207409	0.0128718	Female
LRBA	-4.02107	0.000213329	0.0130344	Female
RCOR3	-4.02193	0.000212754	0.0130344	Female
LOC642852	-4.01464	0.000217673	0.0131797	Female
HNRNPK	-4.01271	0.000218993	0.0132198	Female
C11orf61	-4.00887	0.000221644	0.0133398	Female
KIAA1267	-4.00415	0.000224946	0.0134981	Female
APAF1	-4.00135	0.000226923	0.0135311	Female
ATXN2L	-3.99168	0.000233892	0.0135311	Female
C2CD3	-3.994	0.000232204	0.0135311	Female
DDX6	-3.99415	0.000232094	0.0135311	Female
EDIL3	-3.99821	0.000229165	0.0135311	Female
MED12	-3.98936	0.000235593	0.0135311	Female
POM121	-3.99034	0.000234874	0.0135311	Female
SRCAP	-3.999	0.000228599	0.0135311	Female
TOPORS	-3.99462	0.000231751	0.0135311	Female
WAC	-3.99103	0.000234371	0.0135311	Female
TBCK	-3.98787	0.000236692	0.0135555	Female
LOC284023	-3.97775	0.000244297	0.0138334	Female
FMR1	-3.9759	0.000245716	0.0138493	Female
TTC14	-3.97322	0.000247775	0.0139128	Female
BBX	-3.96761	0.000252157	0.0139638	Female
CYTSA	-3.96822	0.000251678	0.0139638	Female
MBTD1	-3.96781	0.000251994	0.0139638	Female
TNRC18	-3.97011	0.000250198	0.0139638	Female
RNF38	-3.965	0.000254213	0.0139736	Female
ZMYM4	-3.96474	0.00025442	0.0139736	Female
EDEM3	-3.963	0.000255802	0.0139778	Female
HP1BP3	-3.95758	0.000260166	0.0139778	Female
TOP1P1	-3.95685	0.000260754	0.0139778	Female
YTHDC2	-3.95979	0.000258378	0.0139778	Female
AVPR1A	-3.94952	0.00026678	0.014225	Female
C14orf45	-3.94481	0.00027072	0.0143111	Female
FLJ42627	-3.94251	0.000272667	0.0143111	Female
GZF1	-3.94324	0.000272042	0.0143111	Female
MTRR	-3.94379	0.00027158	0.0143111	Female
PHF8	-3.94591	0.000269796	0.0143111	Female
SOX15	-3.94398	0.000271423	0.0143111	Female
ASAP1	-3.93664	0.000277687	0.0145366	Female
TRIM67	-3.93386	0.000280099	0.0145869	Female
KIAA1731	-3.92919	0.000284197	0.0147621	Female
645851	-3.92538	0.000287576	0.0147778	Female
KIAA1191	-3.92389	0.00028891	0.0147778	Female
MIA3	-3.92478	0.000288118	0.0147778	Female
PTPLB	-3.92415	0.000288679	0.0147778	Female
SMG1	-3.92426	0.000288579	0.0147778	Female
TRAPPC2	-3.92539	0.00028757	0.0147778	Female
ARHGAP1	-3.92049	0.000291979	0.0147843	Female
TRIM37	-3.9209	0.000291607	0.0147843	Female
ZMYM3	-3.92159	0.00029098	0.0147843	Female
LOC647979	-3.91349	0.000298395	0.0149957	Female
RPRD2	-3.91269	0.000299138	0.0149957	Female
TMED7	-3.91386	0.000298048	0.0149957	Female
ATF7	-3.90841	0.000303132	0.0150935	Female
NARS2	-3.90819	0.000303342	0.0150935	Female
ARNT	-3.89957	0.000311552	0.0151018	Female
CACNA1C	-3.90398	0.00030732	0.0151018	Female
CBFA2T2	-3.90397	0.000307335	0.0151018	Female
CBLL1	-3.90233	0.000308899	0.0151018	Female
CP110	-3.90025	0.000310901	0.0151018	Female
LOC402377	-3.90034	0.000310807	0.0151018	Female
RASA1	-3.89909	0.000312012	0.0151018	Female
DYNC2H1	-3.89708	0.000313962	0.0151349	Female
PPWD1	-3.89519	0.000315805	0.0151511	Female
ERCC4	-3.89228	0.000318665	0.0152022	Female
IFT172	-3.8898	0.000321117	0.0152022	Female
KIF20A	-3.89078	0.000320151	0.0152022	Female
OTUD3	-3.89164	0.000319295	0.0152022	Female
SLC12A2	-3.88902	0.0003219	0.0152022	Female
KIF16B	-3.88235	0.000328608	0.0152286	Female
PRICKLE1	-3.88325	0.000327691	0.0152286	Female
QTRTD1	-3.88651	0.00032441	0.0152286	Female
WIPF2	-3.88246	0.000328495	0.0152286	Female
ZDHHC5	-3.88218	0.000328783	0.0152286	Female
CPSF7	-3.88126	0.000329723	0.015237	Female
ZEB1	-3.87785	0.000333211	0.0153218	Female
FRMD8	-3.87372	0.000337488	0.0153255	Female
KLHL12	-3.87445	0.00033673	0.0153255	Female
MARCH8	-3.8733	0.000337933	0.0153255	Female
ZNF354A	-3.87203	0.000339263	0.0153255	Female
ZNF493	-3.87438	0.000336802	0.0153255	Female
ZXDB	-3.87247	0.000338793	0.0153255	Female
AGGF1	-3.86929	0.000342145	0.0153368	Female
EIF2C1	-3.86861	0.000342867	0.0153368	Female
MDC1	-3.86871	0.000342758	0.0153368	Female
TSIX	-3.86821	0.000343289	0.0153368	Female
INTS7	-3.86422	0.000347538	0.0153604	Female
SEC31A	-3.86342	0.000348394	0.0153604	Female
ZNF236	-3.86338	0.000348439	0.0153604	Female
ARID1A	-3.86128	0.000350704	0.0153927	Female
EHBP1	-3.86146	0.000350514	0.0153927	Female
PRKD3	-3.86007	0.000352023	0.0153963	Female
STK36	-3.85839	0.000353851	0.0153963	Female
USP54	-3.85867	0.000353546	0.0153963	Female
LRRC8A	-3.85345	0.000359279	0.0154652	Female
OSBP	-3.8551	0.000357463	0.0154652	Female
SPAG1	-3.85563	0.00035687	0.0154652	Female
C11orf30	-3.84703	0.000366466	0.0154652	Female
CCDC21	-3.84649	0.000367069	0.0154652	Female
COPA	-3.84488	0.000368892	0.0154652	Female
DIMT1L	-3.84968	0.000363484	0.0154652	Female
DMD	-3.85062	0.000362428	0.0154652	Female
NDE1	-3.84993	0.000363197	0.0154652	Female
SOCS4	-3.84729	0.000366173	0.0154652	Female
STAU2	-3.84456	0.000369262	0.0154652	Female
TTLL5	-3.84831	0.000365015	0.0154652	Female
RHOT1	-3.84314	0.000370875	0.0154997	Female
PHF12	-3.84222	0.000371928	0.0155114	Female
CDC23	-3.83556	0.000379632	0.0156637	Female
GEMIN5	-3.83658	0.000378446	0.0156637	Female
KIAA0562	-3.83541	0.000379811	0.0156637	Female
NFYA	-3.83706	0.000377885	0.0156637	Female
PTER	-3.83436	0.000381034	0.0156637	Female
SMG7	-3.835	0.000380294	0.0156637	Female
ZNF646	-3.83819	0.000376571	0.0156637	Female
MLL2	-3.83206	0.000383749	0.015711	Female
NEK9	-3.83269	0.000383001	0.015711	Female
FNIP1	-3.83057	0.000385501	0.0157188	Female
PPP1R15B	-3.83121	0.000384746	0.0157188	Female
EVI5	-3.82716	0.00038957	0.0157906	Female
TRAF3IP1	-3.82843	0.000388058	0.0157906	Female
PHF3	-3.82525	0.000391863	0.0158496	Female
TXLNG	-3.82444	0.00039284	0.0158572	Female
UBR5	-3.82367	0.000393777	0.0158631	Female
PRKAR1A	-3.82281	0.000394818	0.0158643	Female
BICD1	-3.81925	0.000399153	0.0158676	Female
DBF4B	-3.81139	0.000408912	0.0158676	Female
FUBP3	-3.80928	0.000411559	0.0158676	Female
KDM3B	-3.80723	0.000414154	0.0158676	Female
KIAA0467	-3.80894	0.000411998	0.0158676	Female
KIAA1429	-3.80968	0.000411057	0.0158676	Female
MNT	-3.81932	0.000399072	0.0158676	Female
MORF4L2	-3.80743	0.000413902	0.0158676	Female
NUMA1	-3.80937	0.000411448	0.0158676	Female
PHF2	-3.81418	0.000405423	0.0158676	Female
SLC23A2	-3.81438	0.000405174	0.0158676	Female
TMEM131	-3.82058	0.000397534	0.0158676	Female
TTC30B	-3.81525	0.000404096	0.0158676	Female
USP47	-3.81028	0.000410302	0.0158676	Female
XYLT1	-3.81142	0.000408865	0.0158676	Female
ZFC3H1	-3.8155	0.000403776	0.0158676	Female
ALPK3	-3.80179	0.00042113	0.0158828	Female
BTBD10	-3.80221	0.000420583	0.0158828	Female
ELK1	-3.80487	0.000417173	0.0158828	Female
KDM4C	-3.80212	0.000420698	0.0158828	Female
LPGAT1	-3.80562	0.000416215	0.0158828	Female
PALB2	-3.80208	0.000420755	0.0158828	Female
PRDM5	-3.802	0.000420856	0.0158828	Female
USP33	-3.80483	0.000417214	0.0158828	Female
NIPSNAP3B	-3.80004	0.000423391	0.0158829	Female
NNT	-3.79937	0.000424258	0.0158829	Female
RANBP9	-3.79935	0.000424292	0.0158829	Female
LSM14B	-3.79814	0.000425862	0.0159121	Female
AHCTF1	-3.79229	0.000433561	0.0159359	Female
C1orf109	-3.79483	0.000430201	0.0159359	Female
CKAP5	-3.79307	0.000432534	0.0159359	Female
DOCK9	-3.79467	0.000430422	0.0159359	Female
HINT3	-3.79224	0.000433634	0.0159359	Female
KDM4A	-3.79311	0.000432483	0.0159359	Female
LANCL1	-3.79673	0.000427713	0.0159359	Female
PUM1	-3.7945	0.000430636	0.0159359	Female
KIAA0240	-3.79091	0.000435407	0.0159427	Female
HIATL1	-3.79028	0.000436241	0.0159442	Female
C22orf30	-3.78592	0.000442111	0.0159844	Female
CELF1	-3.78698	0.000440679	0.0159844	Female
GIGYF2	-3.78662	0.000441159	0.0159844	Female
GXYLT1	-3.78232	0.000447	0.0161321	Female
SMAD9	-3.78006	0.000450108	0.0162152	Female
MDM4	-3.7779	0.000453085	0.0162653	Female
ZNF213	-3.77788	0.000453118	0.0162653	Female
DLG1	-3.77627	0.000455344	0.0162667	Female
MICAL3	-3.7761	0.000455584	0.0162667	Female
RABL2B	-3.7765	0.000455036	0.0162667	Female
ELF2	-3.771	0.000462749	0.0163771	Female
IQGAP3	-3.76858	0.000466176	0.0164436	Female
FOXRED2	-3.7676	0.000467574	0.0164609	Female
PGAP1	-3.76494	0.000471388	0.0165528	Female
YTHDC1	-3.76427	0.000472353	0.0165528	Female
MYST2	-3.76284	0.00047442	0.0165857	Female
LOC100272217	-3.76159	0.000476236	0.0165915	Female
MLL3	-3.75921	0.000479704	0.0166587	Female
DCAF10	-3.75822	0.000481159	0.016672	Female
XPR1	-3.75744	0.000482301	0.016672	Female
BAT2	-3.75587	0.000484616	0.0167079	Female
TRIM23	-3.75488	0.000486079	0.0167079	Female
PKN2	-3.75267	0.000489363	0.0167299	Female
CXorf23	-3.75183	0.000490622	0.0167304	Female
KIAA0494	-3.75155	0.000491044	0.0167304	Female
CCDC88C	-3.75022	0.000493033	0.0167537	Female
TNRC6B	-3.74998	0.000493394	0.0167537	Female
LOC283267	-3.74759	0.000497003	0.016763	Female
TUG1	-3.74917	0.000494622	0.016763	Female
USP28	-3.74764	0.000496932	0.016763	Female
PTPN21	-3.74541	0.000500319	0.0167903	Female
RAD23B	-3.74622	0.000499081	0.0167903	Female
CEP110	-3.7419	0.000505702	0.0168027	Female
CNR2	-3.74307	0.000503896	0.0168027	Female
HACE1	-3.74397	0.000502511	0.0168027	Female
KLHL11	-3.74243	0.000504883	0.0168027	Female
MAML1	-3.74431	0.000501993	0.0168027	Female
MED13	-3.74262	0.000504595	0.0168027	Female
RNF4	-3.74103	0.000507032	0.0168191	Female
NCOA6	-3.7397	0.000509095	0.0168597	Female
MTX3	-3.73584	0.000515112	0.0169621	Female
PDCD7	-3.7362	0.000514543	0.0169621	Female
BRIP1	-3.72687	0.000529368	0.0169664	Female
CBX1	-3.73367	0.00051852	0.0169664	Female
CD22	-3.72763	0.000528138	0.0169664	Female
EPB41L2	-3.72392	0.000534136	0.0169664	Female
FAM161B	-3.72795	0.00052763	0.0169664	Female
FAT4	-3.72446	0.000533258	0.0169664	Female
FEM1C	-3.73175	0.000521562	0.0169664	Female
GPR75	-3.72941	0.000525296	0.0169664	Female
JMJD1C	-3.72228	0.000536795	0.0169664	Female
KITLG	-3.72793	0.000527664	0.0169664	Female
KLHL3	-3.72242	0.000536574	0.0169664	Female
MAP3K1	-3.72251	0.000536424	0.0169664	Female
PCDHGA12	-3.73183	0.000521435	0.0169664	Female
PDPK1	-3.72313	0.00053542	0.0169664	Female
PPFIA1	-3.72803	0.000527491	0.0169664	Female
PPME1	-3.72429	0.000533531	0.0169664	Female
RAB8B	-3.72458	0.000533063	0.0169664	Female
RABGAP1	-3.73419	0.00051771	0.0169664	Female
SAP130	-3.73306	0.000519488	0.0169664	Female
TTF2	-3.72783	0.000527823	0.0169664	Female
ZNF148	-3.72383	0.00053428	0.0169664	Female
DHFR	-3.71494	0.000548897	0.0170581	Female
DNAJB4	-3.71364	0.000551069	0.0170581	Female
FBXO21	-3.71455	0.000549545	0.0170581	Female
HEATR1	-3.71451	0.000549619	0.0170581	Female
KLHL32	-3.71233	0.000553271	0.0170581	Female
LOC100286844	-3.71812	0.000543625	0.0170581	Female
PAPD7	-3.71272	0.000552612	0.0170581	Female
RGS17	-3.71662	0.000546108	0.0170581	Female
RPGR	-3.71601	0.000547122	0.0170581	Female
SFRS14	-3.71997	0.000540581	0.0170581	Female
TSTD2	-3.71928	0.000541705	0.0170581	Female
WDTC1	-3.71882	0.000542466	0.0170581	Female
ALS2CR8	-3.71119	0.000555183	0.0170908	Female
KLHL15	-3.70891	0.000559028	0.0171699	Female
P2RY12	-3.70866	0.00055946	0.0171699	Female
NPAT	-3.70494	0.000565799	0.0171808	Female
PCDHGA10	-3.70621	0.000563635	0.0171808	Female
POM121C	-3.70588	0.000564199	0.0171808	Female
SLC35E2	-3.70543	0.000564972	0.0171808	Female
TUBGCP3	-3.70566	0.000564565	0.0171808	Female
ZNF709	-3.70552	0.000564814	0.0171808	Female
ZNF367	-3.70091	0.000572765	0.0173661	Female
GALNT3	-3.69991	0.000574503	0.0173812	Female
SUDS3	-3.69913	0.000575856	0.0173812	Female
ANUBL1	-3.69863	0.000576736	0.0173816	Female
MLL	-3.69755	0.00057863	0.0173958	Female
MS4A1	-3.6968	0.000579933	0.0173997	Female
CABLES2	-3.69272	0.000587156	0.0175379	Female
TROVE2	-3.69304	0.000586588	0.0175379	Female
PRIM2	-3.69117	0.00058991	0.017542	Female
KIAA0776	-3.6904	0.000591299	0.0175573	Female
ANKH	-3.68939	0.000593106	0.0175591	Female
EXOC5	-3.68846	0.000594773	0.0175825	Female
RC3H1	-3.68736	0.000596765	0.0176155	Female
ATP7A	-3.68506	0.000600931	0.0176254	Female
DCHS1	-3.68429	0.000602323	0.0176254	Female
FBXO3	-3.68396	0.000602928	0.0176254	Female
ZNF423	-3.68379	0.000603236	0.0176254	Female
ZNF70	-3.68457	0.000601818	0.0176254	Female
FAT1	-3.68072	0.000608856	0.017662	Female
HERC2	-3.67977	0.000610611	0.017662	Female
LMBR1	-3.68122	0.000607942	0.017662	Female
SLC38A1	-3.6823	0.000605958	0.017662	Female
VPRBP	-3.6789	0.000612232	0.017662	Female
ZCCHC11	-3.67947	0.000611178	0.017662	Female
ZYG11B	-3.67665	0.000616407	0.0177522	Female
GLYR1	-3.67434	0.000620717	0.0178089	Female
MSN	-3.67387	0.000621606	0.0178089	Female
TRIM33	-3.6737	0.000621921	0.0178089	Female
PCDHGA3	-3.67238	0.000624404	0.0178309	Female
DNAJC14	-3.66841	0.000631944	0.017968	Female
TMC7	-3.66267	0.000642971	0.0182042	Female
LOC100190986	-3.66167	0.000644924	0.0182338	Female
AP3M1	-3.65866	0.000650799	0.018246	Female
KIF24	-3.65888	0.000650367	0.018246	Female
RUNDC1	-3.65992	0.000648327	0.018246	Female
SPOPL	-3.65932	0.000649501	0.018246	Female
PARG	-3.65396	0.0006601	0.0184041	Female
PATL1	-3.65418	0.000659662	0.0184041	Female
MED1	-3.65233	0.000663335	0.0184686	Female
BBS10	-3.65179	0.000664414	0.0184731	Female
RETSAT	-3.65076	0.00066648	0.0185049	Female
SSH1	-3.65025	0.000667515	0.0185081	Female
MPDZ	-3.6485	0.000671049	0.0185302	Female
TESK2	-3.64757	0.000672921	0.0185302	Female
TRIM26	-3.64852	0.000671006	0.0185302	Female
APPL1	-3.64594	0.000676242	0.0185454	Female
PCDHGB1	-3.6428	0.000682654	0.0186743	Female
ATP11B	-3.63803	0.000692524	0.0189146	Female
LRRC37A4	-3.63716	0.000694351	0.0189161	Female
RALGAPA1	-3.6371	0.000694462	0.0189161	Female
CHERP	-3.63197	0.000705254	0.0190556	Female
PSMD10	-3.63322	0.000702613	0.0190556	Female
SMC5	-3.63168	0.00070587	0.0190556	Female
TTC30A	-3.63152	0.000706218	0.0190556	Female
USP31	-3.63232	0.000704512	0.0190556	Female
STX16	-3.63043	0.000708533	0.0190924	Female
EPB41	-3.62585	0.000718345	0.0191874	Female
GNRHR	-3.62693	0.000716019	0.0191874	Female
KIRREL	-3.62811	0.000713493	0.0191874	Female
LYRM7	-3.62567	0.000718738	0.0191874	Female
C17orf63	-3.62239	0.000725858	0.0192243	Female
DACT1	-3.62419	0.000721935	0.0192243	Female
HAUS3	-3.62354	0.000723345	0.0192243	Female
PCDHB4	-3.62352	0.000723388	0.0192243	Female
UBN1	-3.62323	0.000724036	0.0192243	Female
ZFR	-3.62268	0.00072522	0.0192243	Female
CAPRIN1	-3.6208	0.00072933	0.0192908	Female
TSC22D2	-3.61997	0.000731154	0.0193136	Female
POLR1A	-3.61839	0.000734616	0.0193796	Female
NUFIP2	-3.61608	0.000739729	0.0194804	Female
C9orf5	-3.61099	0.000751121	0.0196559	Female
DHX35	-3.61168	0.00074957	0.0196559	Female
LOC100271836	-3.61147	0.000750032	0.0196559	Female
ZNF638	-3.60977	0.000753872	0.0196559	Female
C5orf51	-3.60655	0.000761173	0.0197753	Female
PJA2	-3.60644	0.000761421	0.0197753	Female
SULT1C4	-3.60675	0.00076072	0.0197753	Female
MLL5	-3.60485	0.00076507	0.0197934	Female
TEX261	-3.60316	0.000768952	0.0198427	Female
SH3KBP1	-3.60054	0.000774998	0.0199365	Female
BDNFOS	-3.59962	0.000777135	0.0199514	Female
HELZ	-3.59797	0.000781	0.0199648	Female
SLC22A2	-3.59809	0.000780707	0.0199648	Female
TFB2M	-3.59845	0.000779869	0.0199648	Female
CHD8	-3.59541	0.000787002	0.0199705	Female
LARP1	-3.59494	0.000788108	0.0199705	Female
NUP160	-3.59672	0.000783906	0.0199705	Female
PCDHGB8P	-3.59536	0.000787126	0.0199705	Female
RBM27	-3.59688	0.000783552	0.0199705	Female
SENP6	-3.59464	0.000788807	0.0199705	Female
TOB2	-3.59379	0.000790829	0.0199719	Female
APC	-3.59072	0.00079811	0.0200148	Female
BIRC6	-3.59089	0.000797714	0.0200148	Female
ZNF507	-3.59055	0.000798522	0.0200148	Female
EP400	-3.58985	0.000800192	0.0200317	Female
AMMECR1L	-3.58806	0.000804489	0.020065	Female
GOLGA5	-3.587	0.000807036	0.020065	Female
THUMPD1	-3.58717	0.000806626	0.020065	Female
ZDBF2	-3.58809	0.000804412	0.020065	Female
DPY19L3	-3.58511	0.000811626	0.020068	Female
UBE3B	-3.58527	0.000811232	0.020068	Female
PIKFYVE	-3.5822	0.000818708	0.020181	Female
CEP290	-3.58106	0.000821493	0.0202006	Female
SAMD4B	-3.57987	0.000824428	0.0202006	Female
SASS6	-3.57926	0.000825922	0.0202006	Female
CEP350	-3.57879	0.000827079	0.0202016	Female
ZNF92	-3.57833	0.000828212	0.0202048	Female
C12orf66	-3.57571	0.000834731	0.0203145	Female
CCDC76	-3.57213	0.000843698	0.0204831	Female
HNRNPUL1	-3.56962	0.000850035	0.0205377	Female
POLR1B	-3.56974	0.000849718	0.0205377	Female
AMIGO1	-3.56842	0.000853077	0.0205855	Female
RCOR1	-3.56804	0.000854061	0.0205855	Female
TLN1	-3.56695	0.000856827	0.0206275	Female
PMS1	-3.56548	0.000860584	0.0206931	Female
TAOK2	-3.56154	0.000870771	0.0208632	Female
FRS2	-3.55836	0.000879053	0.0209866	Female
BCL9	-3.55249	0.000894546	0.0210214	Female
BIRC2	-3.55259	0.000894281	0.0210214	Female
C18orf45	-3.55264	0.000894134	0.0210214	Female
CCL28	-3.55226	0.000895152	0.0210214	Female
OR1J4	-3.55312	0.000892865	0.0210214	Female
PTK2	-3.55321	0.000892638	0.0210214	Female
RNPC3	-3.55289	0.000893472	0.0210214	Female
TNRC6A	-3.55414	0.000890173	0.0210214	Female
TSPAN12	-3.55625	0.000884595	0.0210214	Female
TXNDC16	-3.55593	0.000885428	0.0210214	Female
ZNF514	-3.5559	0.000885501	0.0210214	Female
LOC653501	-3.55092	0.000898735	0.0210574	Female
ZNF250	-3.55077	0.000899123	0.0210574	Female
ZNF37A	-3.55012	0.000900875	0.0210574	Female
SEPT7P2	-3.54965	0.000902126	0.0210622	Female
LRRC40	-3.54681	0.000909783	0.0211516	Female
NR3C1	-3.54625	0.000911303	0.0211516	Female
PPAT	-3.54691	0.000909521	0.0211516	Female
UBQLN2	-3.54561	0.000913042	0.0211516	Female
ZNF703	-3.54654	0.000910522	0.0211516	Female
C16orf81	-3.54501	0.000914687	0.0211524	Female
KIAA1147	-3.54472	0.000915459	0.0211524	Female
KBTBD7	-3.54301	0.000920126	0.0212296	Female
ALG10B	-3.54061	0.000926728	0.0213392	Female
PCDHGB6	-3.53775	0.000934629	0.0214719	Female
HIP1	-3.53573	0.000940236	0.0215269	Female
SLC5A4	-3.53583	0.00093998	0.0215269	Female
POLR2A	-3.5347	0.000943141	0.0215614	Female
RAB33B	-3.53405	0.000944961	0.0215614	Female
TOR1AIP2	-3.53414	0.000944686	0.0215614	Female
GPR173	-3.52904	0.000959119	0.0217733	Female
TRIM59	-3.52885	0.000959661	0.0217733	Female
ANKRD17	-3.52742	0.00096372	0.0217824	Female
MCART1	-3.52681	0.000965483	0.0217824	Female
NID1	-3.52787	0.000962445	0.0217824	Female
LOC339047	-3.52225	0.000978627	0.0219861	Female
NAV1	-3.5222	0.000978758	0.0219861	Female
TAOK3	-3.52164	0.000980394	0.0219954	Female
ANKRD40	-3.52083	0.000982744	0.0220044	Female
API5	-3.52075	0.000982985	0.0220044	Female
C1orf27	-3.51717	0.000993473	0.0220194	Female
COIL	-3.51678	0.000994608	0.0220194	Female
HERC4	-3.51782	0.00099156	0.0220194	Female
HSF2	-3.51687	0.000994343	0.0220194	Female
IPO7	-3.51894	0.000988265	0.0220194	Female
MIER1	-3.51775	0.000991758	0.0220194	Female
STXBP1	-3.51791	0.000991303	0.0220194	Female
ZNF146	-3.51965	0.000986195	0.0220194	Female
ATG2B	-3.51601	0.000996892	0.0220215	Female
SEMA6D	-3.51426	0.00100208	0.0221015	Female
KIAA2018	-3.50993	0.00101499	0.0222501	Female
OR2A1	-3.50788	0.00102116	0.0223125	Female
TOP2B	-3.50808	0.00102056	0.0223125	Female
EIF1AX	-3.50618	0.00102633	0.022401	Female
ARMC3	-3.50247	0.00103764	0.0225074	Female
CCDC39	-3.49866	0.00104941	0.0225074	Female
CDC7	-3.49882	0.0010489	0.0225074	Female
DMTF1	-3.49767	0.00105248	0.0225074	Female
FUBP1	-3.49967	0.00104627	0.0225074	Female
NEO1	-3.49784	0.00105196	0.0225074	Female
PLAGL2	-3.50358	0.00103425	0.0225074	Female
PUS7L	-3.50045	0.00104386	0.0225074	Female
TNPO2	-3.5019	0.0010394	0.0225074	Female
AFF4	-3.4972	0.00105393	0.0225145	Female
ACER2	-3.49339	0.00106586	0.0226615	Female
KIAA0586	-3.49243	0.00106889	0.0226615	Female
PI4KA	-3.49349	0.00106554	0.0226615	Female
RNASEN	-3.49213	0.00106983	0.0226615	Female
SRRM2	-3.49247	0.00106878	0.0226615	Female
STRN3	-3.49343	0.00106575	0.0226615	Female
ZNF654	-3.49245	0.00106884	0.0226615	Female
INVS	-3.49101	0.00107338	0.0227127	Female
RBBP6	-3.49003	0.00107648	0.0227305	Female
UBXN2A	-3.49014	0.00107615	0.0227305	Female
ATF1	-3.48815	0.00108247	0.0227908	Female
RBL1	-3.48807	0.00108274	0.0227908	Female
TMEM65	-3.48858	0.0010811	0.0227908	Female
ZNF813	-3.48763	0.00108415	0.0227966	Female
FZD8	-3.48648	0.00108783	0.0228082	Female
SP2	-3.4864	0.0010881	0.0228082	Female
GAPVD1	-3.48496	0.00109272	0.0228336	Female
ZBTB41	-3.48512	0.00109221	0.0228336	Female
ST6GAL2	-3.48431	0.00109482	0.0228536	Female
INSRR	-3.48273	0.00109995	0.0228894	Female
STAM2	-3.48289	0.00109943	0.0228894	Female
SLC10A7	-3.48203	0.0011022	0.0229125	Female
ARHGAP5	-3.48018	0.00110824	0.0229953	Female
FAM106A	-3.47915	0.00111162	0.0230303	Female
ITSN2	-3.47889	0.00111245	0.0230303	Female
PIP4K2A	-3.47817	0.00111483	0.0230323	Female
RNF44	-3.47843	0.00111396	0.0230323	Female
PCDHGB4	-3.47772	0.00111632	0.0230392	Female
RAB9B	-3.47727	0.00111778	0.0230457	Female
RBL2	-3.47627	0.0011211	0.0230727	Female
WNK1	-3.47618	0.00112138	0.0230727	Female
ARHGAP23	-3.47542	0.00112391	0.0230774	Female
ZFYVE9	-3.47543	0.00112385	0.0230774	Female
CCDC91	-3.47386	0.00112907	0.0231266	Female
PWWP2A	-3.47351	0.00113024	0.0231266	Female
DOK6	-3.47266	0.00113307	0.0231474	Female
RFXAP	-3.47168	0.00113634	0.023167	Female
UBR3	-3.47195	0.00113544	0.023167	Female
MTR	-3.47077	0.00113939	0.0232057	Female
ACAP2	-3.46832	0.00114763	0.0232792	Female
WDFY4	-3.46899	0.00114537	0.0232792	Female
ACACA	-3.46645	0.00115397	0.023349	Female
MCC	-3.46628	0.00115456	0.023349	Female
WDR45L	-3.46436	0.0011611	0.0234342	Female
SUN1	-3.46357	0.00116378	0.0234647	Female
ZNF425	-3.46294	0.00116596	0.0234852	Female
KCTD21	-3.46088	0.00117303	0.0235331	Female
MON2	-3.46111	0.00117226	0.0235331	Female
NSD1	-3.46147	0.001171	0.0235331	Female
SP3	-3.46175	0.00117005	0.0235331	Female
TSSK3	-3.46005	0.0011759	0.0235671	Female
PER2	-3.45945	0.00117798	0.0235855	Female
PTPN11	-3.4575	0.00118477	0.0236506	Female
RAPGEF5	-3.45782	0.00118364	0.0236506	Female
UBN2	-3.45801	0.00118297	0.0236506	Female
ZNF687	-3.45646	0.00118837	0.023699	Female
MLLT4	-3.45476	0.00119433	0.0237943	Female
C6orf204	-3.45377	0.00119782	0.0238401	Female
ZNF644	-3.45286	0.00120101	0.02388	Female
NCOR2	-3.45116	0.00120703	0.0239761	Female
ATP2C1	-3.44978	0.00121193	0.024017	Female
FBXO38	-3.45013	0.0012107	0.024017	Female
GOPC	-3.4474	0.00122043	0.0241468	Female
DMXL1	-3.44444	0.00123108	0.0242145	Female
THRAP3	-3.44462	0.00123044	0.0242145	Female
SPATA1	-3.44371	0.00123372	0.0242357	Female
BTRC	-3.44283	0.00123692	0.0242399	Female
C5orf28	-3.44	0.0012472	0.0242399	Female
CASP8AP2	-3.44063	0.0012449	0.0242399	Female
CRKL	-3.44205	0.00123975	0.0242399	Female
DYNLT3	-3.43984	0.0012478	0.0242399	Female
HUWE1	-3.44076	0.00124443	0.0242399	Female
PDS5A	-3.44027	0.00124621	0.0242399	Female
RBMXL1	-3.44209	0.0012396	0.0242399	Female
ZC3H12D	-3.43977	0.00124805	0.0242399	Female
RG9MTD2	-3.43886	0.00125137	0.0242576	Female
RNF6	-3.43892	0.00125116	0.0242576	Female
PCNP	-3.43759	0.00125605	0.0243248	Female
FAM13C	-3.43716	0.00125763	0.024332	Female
FKTN	-3.43616	0.00126134	0.0243536	Female
WDR20	-3.43598	0.00126199	0.0243536	Female
ZC3H11A	-3.43588	0.00126238	0.0243536	Female
MIER3	-3.43531	0.00126447	0.0243667	Female
TMSB15B	-3.43504	0.00126549	0.0243667	Female
TTC21B	-3.43394	0.00126956	0.0244216	Female
CDR2	-3.43323	0.00127222	0.0244226	Female
ZCCHC3	-3.43295	0.00127325	0.0244226	Female
BAT2L2	-3.43183	0.00127743	0.0244793	Female
IMPG2	-3.43068	0.00128175	0.0245387	Female
GPATCH8	-3.4303	0.00128316	0.0245425	Female
ABI2	-3.42924	0.00128715	0.0245719	Female
PIP4K2B	-3.42928	0.00128703	0.0245719	Female
PIGK	-3.42888	0.00128851	0.0245746	Female
ZCCHC4	-3.42851	0.00128992	0.0245781	Female
CCNE2	-3.42809	0.00129152	0.0245853	Female
KPNA6	-3.42698	0.00129572	0.0246187	Female
FAM172A	-3.42501	0.0013032	0.0247375	Female
TRAK1	-3.42463	0.00130463	0.0247413	Female
TMTC4	-3.42296	0.00131105	0.0248394	Female
KIAA1432	-3.42057	0.00132025	0.0249667	Female
CNTN4	-3.41916	0.00132571	0.025023	Female
SFRS2IP	-3.41928	0.00132522	0.025023	Female
SEPT6	-3.41427	0.00134477	0.0253588	Female
USP37	-3.41351	0.00134778	0.0253918	Female
GREB1L	-3.41293	0.00135006	0.0254109	Female
ORC3L	-3.41193	0.00135401	0.0254288	Female
C1orf58	-3.40989	0.00136209	0.0254305	Female
CIT	-3.40929	0.00136448	0.0254305	Female
IRS1	-3.4098	0.00136245	0.0254305	Female
MDM1	-3.41032	0.00136038	0.0254305	Female
TAF4B	-3.40862	0.00136715	0.0254305	Female
TLR10	-3.40852	0.00136754	0.0254305	Female
ULBP1	-3.40971	0.0013628	0.0254305	Female
NBPF16	-3.40716	0.00137301	0.025438	Female
TOPBP1	-3.40774	0.00137069	0.025438	Female
ZNF878	-3.40724	0.00137267	0.025438	Female
KCTD16	-3.40614	0.00137709	0.0254667	Female
TRIM32	-3.40618	0.00137694	0.0254667	Female
BRWD3	-3.40561	0.00137923	0.0254829	Female
AXIN2	-3.40488	0.00138217	0.0254952	Female
BRCC3	-3.40481	0.00138244	0.0254952	Female
SFRS1	-3.40449	0.00138373	0.0254957	Female
PIWIL2	-3.40221	0.00139296	0.0255953	Female
ZCCHC8	-3.40238	0.00139226	0.0255953	Female
THAP2	-3.40174	0.00139487	0.025607	Female
ZNF37B	-3.39894	0.00140633	0.0257234	Female
ZNF551	-3.39844	0.00140836	0.0257371	Female
CLCN6	-3.3968	0.00141511	0.0257461	Female
ELK4	-3.39677	0.00141525	0.0257461	Female
STS	-3.39526	0.00142148	0.0258359	Female
BMP8B	-3.39474	0.00142365	0.0258521	Female
CACNA2D1	-3.39368	0.00142806	0.0258854	Female
KCNQ5	-3.39388	0.0014272	0.0258854	Female
DNAJC10	-3.39208	0.00143473	0.0259127	Female
EFCAB7	-3.39238	0.00143345	0.0259127	Female
ITPR3	-3.39245	0.00143316	0.0259127	Female
C8orf37	-3.38991	0.0014438	0.0259715	Female
LOC200030	-3.38976	0.00144444	0.0259715	Female
LOC285696	-3.38853	0.00144963	0.0260322	Female
ZNF397OS	-3.38834	0.00145041	0.0260322	Female
DIP2A	-3.38586	0.00146093	0.0261278	Female
MS4A14	-3.38604	0.00146019	0.0261278	Female
HSPA13	-3.38186	0.00147805	0.0263636	Female
PHC3	-3.38188	0.00147796	0.0263636	Female
CWC22	-3.37992	0.0014864	0.0264594	Female
STT3A	-3.3797	0.00148737	0.0264594	Female
ZNF747	-3.3785	0.00149257	0.0265049	Female
PRDM2	-3.37639	0.00150172	0.0266205	Female
MYST4	-3.37597	0.00150359	0.02663	Female
ZNF800	-3.37485	0.00150846	0.0266929	Female
SLC15A2	-3.37393	0.00151252	0.0267303	Female
CLASP1	-3.37331	0.00151522	0.0267418	Female
CASP2	-3.3712	0.00152453	0.0267886	Female
DCAF5	-3.37136	0.00152384	0.0267886	Female
KIAA0406	-3.37123	0.00152443	0.0267886	Female
KIAA1712	-3.37152	0.00152314	0.0267886	Female
RAB5B	-3.37157	0.00152291	0.0267886	Female
DNAJC21	-3.37002	0.00152979	0.026834	Female
R3HDM1	-3.3694	0.00153252	0.0268585	Female
ANKRD42	-3.36671	0.00154455	0.0268649	Female
MAPK1IP1L	-3.36682	0.00154406	0.0268649	Female
PEX3	-3.36778	0.00153975	0.0268649	Female
RNF160	-3.36836	0.00153719	0.0268649	Female
SBF2	-3.36858	0.0015362	0.0268649	Female
RAI1	-3.36546	0.00155018	0.0268907	Female
TMEM184C	-3.36563	0.00154938	0.0268907	Female
[truncated: 1,422 more rows]

## Sheet: ESCA
gene	stat	p	fdr	direction
[truncated: 1,578 more rows]

[truncated: 21 more sheets: GBM, GBM525, HNSC, KICH, KIRC, KIRP, LAML, LGG, LIHC, LUAD, LUSC, MESO, PAAD, PCPG, READ, SARC, SKCM, STAD, THCA, THYM …]
